# Supplementary material for: Emerging cooperativity between Oct4 and Sox2 governs the pluripotency network in early mouse embryos
Source: bioRxiv preprint, doi:10.1101/2023.10.18.562912, version 3 (2024-11-20)
Supplement: Dataset supplement 1. DESeq2 of ATAC-seq peaks [file 562912_file06.xlsx]

## Sheet: res.all
chr	start	end	name	baseMean	Oct4_KO_Morula_vs_Oct4_Ctrl_Morula.log2FoldChange	Oct4_KO_Morula_vs_Oct4_Ctrl_Morula.significance	Oct4_KO_LateMorula_vs_Oct4_Ctrl_LateMorula.log2FoldChange	Oct4_KO_LateMorula_vs_Oct4_Ctrl_LateMorula.significance	Oct4_KO_EarlyICM_vs_Oct4_Ctrl_EarlyICM.log2FoldChange	Oct4_KO_EarlyICM_vs_Oct4_Ctrl_EarlyICM.significance	Oct4_KO_LateICM_vs_Oct4_Ctrl_LateICM.log2FoldChange	Oct4_KO_LateICM_vs_Oct4_Ctrl_LateICM.significance	Sox2_KO_EarlyICM_vs_Sox2_Ctrl_EarlyICM.log2FoldChange	Sox2_KO_EarlyICM_vs_Sox2_Ctrl_EarlyICM.significance	Sox2_KO_LateICM_vs_Sox2_Ctrl_LateICM.log2FoldChange	Sox2_KO_LateICM_vs_Sox2_Ctrl_LateICM.significance
chr1	3045056	3045083	chr1:3045056-3045083	1.47856	-1.13406	FALSE	0.180158	FALSE	1.39551	FALSE	0.995024	FALSE	2.10335	FALSE	1.56148	FALSE
chr1	3046456	3046670	chr1:3046456-3046670	6.68911	-0.520341	FALSE	-2.14412	FALSE	0.00500201	FALSE	0.799403	FALSE	-1.31035	FALSE	0.352173	FALSE
chr1	3054436	3054650	chr1:3054436-3054650	1.81522	1.68755	FALSE	-0.0898631	FALSE	-2.00799	FALSE	0.367944	FALSE	-1.82406	FALSE	0.742471	FALSE
chr1	3058390	3058565	chr1:3058390-3058565	9.82514	-0.0206839	FALSE	0.380171	FALSE	-0.272459	FALSE	0.416454	FALSE	-0.552172	FALSE	0.54416	FALSE
chr1	3062632	3062668	chr1:3062632-3062668	3.28401	-3.06222	FALSE	-1.82252	FALSE	-2.21786	FALSE	-1.87737	FALSE	-0.31236	FALSE	-3.14878	Down
chr1	3062890	3062958	chr1:3062890-3062958	6.68878	-1.12564	FALSE	0.474632	FALSE	-1.84854	FALSE	-2.14289	Down	-5.01518	Down	-4.49318	Down
chr1	3072540	3072730	chr1:3072540-3072730	5.54317	0.9035	FALSE	-0.287462	FALSE	0.603575	FALSE	0.964675	FALSE	-3.44779	FALSE	-1.75056	FALSE
chr1	3399992	3400382	chr1:3399992-3400382	13.8464	-5.11937	FALSE	-1.5396	FALSE	-2.13383	Down	-2.88218	Down	-0.343238	FALSE	-0.44826	FALSE
chr1	3423785	3423830	chr1:3423785-3423830	2.93327	1.00399	FALSE	1.95813	FALSE	-1.04094	FALSE	-1.70568	FALSE	-1.95385	FALSE	-0.0383509	FALSE
chr1	3435368	3435493	chr1:3435368-3435493	1.70039	0.790175	FALSE	0.975429	FALSE	-2.0769	FALSE	-4.36795	Down	-0.0909597	FALSE	2.15706	FALSE
chr1	3445009	3445111	chr1:3445009-3445111	15.6419	-0.186038	FALSE	-0.5164	FALSE	-1.46679	Down	-1.05389	FALSE	-0.208386	FALSE	0.265171	FALSE
chr1	3445595	3445701	chr1:3445595-3445701	26.6218	0.141129	FALSE	-0.0409373	FALSE	-0.287617	FALSE	-0.807893	FALSE	-0.84014	FALSE	-0.156527	FALSE
chr1	3445935	3446181	chr1:3445935-3446181	28.1431	0.0936097	FALSE	-0.60606	FALSE	-0.870528	FALSE	-1.1672	Down	-0.429093	FALSE	-0.208765	FALSE
chr1	3593072	3593158	chr1:3593072-3593158	3.18377	-1.17662	FALSE	-1.86849	FALSE	-0.360394	FALSE	0.346051	FALSE	-0.602277	FALSE	0.296284	FALSE
chr1	3671417	3671429	chr1:3671417-3671429	7.85032	0.304012	FALSE	-0.195186	FALSE	0.108462	FALSE	0.140597	FALSE	-0.460856	FALSE	0.448726	FALSE
chr1	3671686	3671841	chr1:3671686-3671841	12.6836	0.489308	FALSE	0.423795	FALSE	-0.0697015	FALSE	-0.216577	FALSE	0.0017253	FALSE	0.985127	FALSE
chr1	3672158	3672239	chr1:3672158-3672239	7.60827	-0.305301	FALSE	0.0564247	FALSE	-0.110065	FALSE	0.243807	FALSE	-1.15015	FALSE	0.0450837	FALSE
chr1	3727677	3727873	chr1:3727677-3727873	4.49513	-0.505998	FALSE	0.420015	FALSE	1.19656	FALSE	1.35004	FALSE	-1.16939	FALSE	-0.512692	FALSE
chr1	3728090	3728121	chr1:3728090-3728121	3.103	-1.54199	FALSE	-1.32488	FALSE	-0.0969341	FALSE	0.868721	FALSE	-1.0075	FALSE	1.40469	FALSE
chr1	3798952	3798968	chr1:3798952-3798968	3.11538	-0.189682	FALSE	1.05015	FALSE	-2.18471	FALSE	1.55066	FALSE	-1.01347	FALSE	0.29957	FALSE
chr1	3799243	3799244	chr1:3799243-3799244	2.9676	1.01674	FALSE	0.132735	FALSE	-2.52794	FALSE	-0.579995	FALSE	-2.11081	FALSE	-0.193082	FALSE
chr1	3916284	3916309	chr1:3916284-3916309	3.44768	-3.55997	FALSE	2.84504	FALSE	-2.17428	FALSE	-0.734252	FALSE	-1.04962	FALSE	-0.915043	FALSE
chr1	3931060	3931297	chr1:3931060-3931297	3.7764	-2.03907	FALSE	0.337925	FALSE	-0.890953	FALSE	0.202185	FALSE	-0.293963	FALSE	-0.381223	FALSE
chr1	3934310	3934410	chr1:3934310-3934410	3.5594	1.26126	FALSE	-1.66209	FALSE	-3.7684	FALSE	0.485363	FALSE	-0.300192	FALSE	0.612067	FALSE
chr1	3949178	3949375	chr1:3949178-3949375	7.16998	-0.886051	FALSE	0.0180744	FALSE	0.868379	FALSE	1.50448	FALSE	0.175736	FALSE	0.878077	FALSE
chr1	3953719	3953839	chr1:3953719-3953839	18.9561	0.482948	FALSE	0.0307277	FALSE	-1.0077	FALSE	-1.51846	Down	-1.44975	FALSE	-1.44565	Down
chr1	3956410	3956551	chr1:3956410-3956551	28.283	-0.375193	FALSE	-0.6482	FALSE	-2.23735	Down	-1.51334	Down	-0.485631	FALSE	-0.0688254	FALSE
chr1	3957653	3957661	chr1:3957653-3957661	8.26781	-0.164647	FALSE	-0.0918115	FALSE	-1.29584	FALSE	-0.624432	FALSE	-0.198564	FALSE	0.722061	FALSE
chr1	3959101	3959301	chr1:3959101-3959301	33.2398	0.419815	FALSE	0.0165149	FALSE	0.0387074	FALSE	0.4793	FALSE	0.11578	FALSE	0.687379	FALSE
chr1	3982097	3982276	chr1:3982097-3982276	5.32499	1.28792	FALSE	-1.35217	FALSE	-4.405	Down	-4.56673	Down	-6.61365	Down	-4.35761	Down
chr1	3982744	3982839	chr1:3982744-3982839	5.74085	-0.869097	FALSE	-1.98074	FALSE	-2.63619	Down	-1.7998	FALSE	-2.31635	FALSE	-1.67667	FALSE
chr1	3983903	3983959	chr1:3983903-3983959	12.7175	0.147599	FALSE	-0.625317	FALSE	-0.627781	FALSE	1.42184	FALSE	0.357287	FALSE	0.589646	FALSE
chr1	3986005	3986026	chr1:3986005-3986026	5.58832	3.26627	FALSE	0.550683	FALSE	-0.317238	FALSE	2.0265	Up	-0.28248	FALSE	0.262828	FALSE
chr1	3988458	3988502	chr1:3988458-3988502	6.24663	0.412321	FALSE	-1.19628	FALSE	0.960561	FALSE	0.67488	FALSE	-0.085819	FALSE	1.08012	FALSE
chr1	3988993	3989086	chr1:3988993-3989086	6.3856	-0.516666	FALSE	-0.659341	FALSE	-1.37065	FALSE	-1.06223	FALSE	-0.528227	FALSE	0.00762808	FALSE
chr1	3994290	3994310	chr1:3994290-3994310	2.69819	0.236064	FALSE	-1.82496	FALSE	-3.079	FALSE	-4.57013	Down	-2.29997	FALSE	-0.789734	FALSE
chr1	4015089	4015284	chr1:4015089-4015284	3.85956	-0.637919	FALSE	-1.43703	FALSE	1.26331	FALSE	0.730221	FALSE	-1.09461	FALSE	2.4718	FALSE
chr1	4029156	4029412	chr1:4029156-4029412	7.65181	-2.50537	FALSE	-0.708629	FALSE	0.0433932	FALSE	1.83905	Up	-0.578377	FALSE	0.819403	FALSE
chr1	4059424	4059482	chr1:4059424-4059482	3.49697	-0.651213	FALSE	-0.743243	FALSE	-1.36853	FALSE	-1.76863	FALSE	-1.0091	FALSE	-1.19384	FALSE
chr1	4326714	4326716	chr1:4326714-4326716	6.69193	-2.11778	FALSE	-0.151638	FALSE	1.87228	FALSE	4.23876	Up	-0.649768	FALSE	0.674904	FALSE
chr1	4327050	4327274	chr1:4327050-4327274	38.5362	-0.643392	FALSE	-0.285373	FALSE	0.907575	FALSE	1.66073	Up	-0.183235	FALSE	1.09487	Up
chr1	4327491	4327583	chr1:4327491-4327583	17.4797	-0.652175	FALSE	-0.309218	FALSE	1.03309	FALSE	1.77532	Up	0.023225	FALSE	1.54444	Up
chr1	4332599	4332608	chr1:4332599-4332608	1.68119	-0.747368	FALSE	-2.11819	FALSE	-1.61531	FALSE	0.380964	FALSE	-2.03773	FALSE	0.863969	FALSE
chr1	4396966	4397169	chr1:4396966-4397169	5.67762	-1.20839	FALSE	-2.11298	FALSE	-1.40636	FALSE	-2.08793	Down	-3.10758	Down	-1.8602	FALSE
chr1	4399851	4400070	chr1:4399851-4400070	1.68729	1.21316	FALSE	0.951954	FALSE	0.307068	FALSE	0.906037	FALSE	-0.926283	FALSE	-0.223663	FALSE
chr1	4416838	4416923	chr1:4416838-4416923	4.46996	2.07262	FALSE	0.278425	FALSE	-1.07083	FALSE	0.984535	FALSE	0.415993	FALSE	-0.419162	FALSE
chr1	4422558	4422700	chr1:4422558-4422700	22.5253	-0.254784	FALSE	-0.0603555	FALSE	0.406691	FALSE	0.569423	FALSE	-0.792363	FALSE	-0.536505	FALSE
chr1	4424542	4424906	chr1:4424542-4424906	9.89453	-0.40995	FALSE	0.722122	FALSE	0.0861526	FALSE	0.126627	FALSE	-0.944135	FALSE	-1.33261	FALSE
chr1	4432710	4432996	chr1:4432710-4432996	9.18661	-0.421935	FALSE	0.328384	FALSE	0.527496	FALSE	0.631223	FALSE	0.0567344	FALSE	-0.217371	FALSE
chr1	4448105	4448299	chr1:4448105-4448299	21.7254	0.263076	FALSE	-0.160978	FALSE	-0.355909	FALSE	-0.753521	FALSE	-0.556365	FALSE	-0.300184	FALSE
chr1	4453792	4453959	chr1:4453792-4453959	4.06965	-1.21279	FALSE	-0.347168	FALSE	0.731126	FALSE	0.298035	FALSE	0.116363	FALSE	0.229402	FALSE
chr1	4457090	4457111	chr1:4457090-4457111	3.00191	1.7318	FALSE	-0.845979	FALSE	-0.764302	FALSE	-1.91644	FALSE	-0.0789581	FALSE	-2.88015	FALSE
chr1	4471467	4471580	chr1:4471467-4471580	10.9971	-0.239824	FALSE	-1.67668	FALSE	-3.92368	Down	-2.77388	Down	-0.376797	FALSE	0.0222395	FALSE
chr1	4471953	4472025	chr1:4471953-4472025	5.79702	-1.57191	FALSE	-2.50275	FALSE	-3.88646	Down	-4.44935	Down	-0.631818	FALSE	-0.203016	FALSE
chr1	4492581	4492723	chr1:4492581-4492723	6.69222	-2.34319	FALSE	-0.59495	FALSE	-2.09805	Down	-1.20789	FALSE	-0.351764	FALSE	-0.385453	FALSE
chr1	4493548	4493751	chr1:4493548-4493751	10.0314	0.811641	FALSE	-0.661414	FALSE	-0.20188	FALSE	-0.588837	FALSE	-0.228735	FALSE	-0.506025	FALSE
chr1	4537455	4537795	chr1:4537455-4537795	12.7979	-1.50816	FALSE	-0.664496	FALSE	-1.82041	FALSE	-0.0544364	FALSE	0.0391105	FALSE	0.266928	FALSE
chr1	4538379	4538573	chr1:4538379-4538573	8.91305	-2.34189	FALSE	-1.60594	FALSE	-5.25847	Down	-0.192207	FALSE	-0.193704	FALSE	-0.215073	FALSE
chr1	4571642	4571908	chr1:4571642-4571908	14.3338	0.497807	FALSE	1.27407	FALSE	1.0816	FALSE	0.444287	FALSE	0.0647712	FALSE	-0.12841	FALSE
chr1	4628352	4628484	chr1:4628352-4628484	4.22949	-0.352137	FALSE	-0.468177	FALSE	0.916524	FALSE	-0.182537	FALSE	1.76385	FALSE	0.0359663	FALSE
chr1	4629486	4629524	chr1:4629486-4629524	3.00202	2.10228	FALSE	0.625766	FALSE	-1.05923	FALSE	-1.50606	FALSE	0.076196	FALSE	-1.04638	FALSE
chr1	4660269	4660340	chr1:4660269-4660340	7.20899	0.411818	FALSE	0.917672	FALSE	-0.866283	FALSE	-2.57835	Down	-1.37759	FALSE	-2.91512	Down
chr1	4660726	4660917	chr1:4660726-4660917	6.39708	0.148074	FALSE	0.647849	FALSE	-0.86714	FALSE	-0.378667	FALSE	-0.138522	FALSE	-1.84249	Down
chr1	4671173	4671390	chr1:4671173-4671390	6.83364	-2.06738	FALSE	-2.05669	FALSE	-0.000879409	FALSE	0.670794	FALSE	-0.148108	FALSE	-0.0853765	FALSE
chr1	4671685	4671713	chr1:4671685-4671713	2.85451	-0.945734	FALSE	1.38251	FALSE	-0.163595	FALSE	-0.148271	FALSE	-0.486663	FALSE	0.338799	FALSE
chr1	4673031	4673114	chr1:4673031-4673114	3.26913	0.764035	FALSE	-0.497034	FALSE	1.96317	FALSE	1.12293	FALSE	0.727114	FALSE	-0.645647	FALSE
chr1	4674545	4674676	chr1:4674545-4674676	5.08267	-1.26219	FALSE	-0.0838042	FALSE	1.02334	FALSE	0.87251	FALSE	-0.13388	FALSE	0.0885953	FALSE
chr1	4712602	4712706	chr1:4712602-4712706	3.66901	0.156653	FALSE	0.405555	FALSE	1.84946	FALSE	0.779123	FALSE	0.703219	FALSE	2.04165	FALSE
chr1	4739369	4739467	chr1:4739369-4739467	5.39626	-1.26019	FALSE	-0.233347	FALSE	-0.686277	FALSE	0.308503	FALSE	-0.346203	FALSE	-0.791766	FALSE
chr1	4761568	4761604	chr1:4761568-4761604	3.28314	0.655784	FALSE	-1.30253	FALSE	-0.832898	FALSE	-3.3946	Down	0.62356	FALSE	-0.253794	FALSE
chr1	4762361	4762423	chr1:4762361-4762423	11.3125	0.147197	FALSE	0.512948	FALSE	0.447808	FALSE	1.91416	Up	-0.384667	FALSE	0.0566124	FALSE
chr1	4765145	4765163	chr1:4765145-4765163	3.70821	-0.121719	FALSE	-0.627321	FALSE	1.54473	FALSE	-0.228621	FALSE	0.998726	FALSE	-2.28954	FALSE
chr1	4770518	4770521	chr1:4770518-4770521	3.48502	-0.24526	FALSE	-0.449345	FALSE	-0.206488	FALSE	-0.893585	FALSE	-0.480514	FALSE	0.44258	FALSE
chr1	4779829	4779851	chr1:4779829-4779851	7.62332	-1.24325	FALSE	-3.29943	FALSE	-1.08978	FALSE	-2.19243	FALSE	0.739429	FALSE	-0.984993	FALSE
chr1	4784354	4784366	chr1:4784354-4784366	5.64843	0.626014	FALSE	-0.273571	FALSE	-1.29244	FALSE	-1.14069	FALSE	0.0739201	FALSE	-1.2218	FALSE
chr1	4785660	4785798	chr1:4785660-4785798	14.39	0.594952	FALSE	0.313058	FALSE	-0.324815	FALSE	-1.14003	Down	-0.12609	FALSE	0.0707791	FALSE
chr1	4788017	4788230	chr1:4788017-4788230	35.748	0.678288	FALSE	-0.190262	FALSE	-0.33463	FALSE	-1.07785	Down	0.0190783	FALSE	-1.02314	Down
chr1	4788565	4788694	chr1:4788565-4788694	11.0107	-0.0933016	FALSE	0.156783	FALSE	0.167627	FALSE	-1.28989	Down	-1.32681	FALSE	-0.511127	FALSE
chr1	4800371	4800707	chr1:4800371-4800707	8.47115	-1.4765	FALSE	-0.84469	FALSE	-1.07218	FALSE	-0.484292	FALSE	-0.933878	FALSE	-0.194372	FALSE
chr1	4801649	4801661	chr1:4801649-4801661	8.19732	0.108407	FALSE	-0.186397	FALSE	-0.813138	FALSE	-0.446748	FALSE	0.183913	FALSE	-0.228467	FALSE
chr1	4802656	4802803	chr1:4802656-4802803	26.1996	0.0570622	FALSE	0.138609	FALSE	-1.07377	FALSE	-1.87076	Down	-1.95679	Down	-3.33373	Down
chr1	4806010	4806028	chr1:4806010-4806028	4.22256	-1.34806	FALSE	-1.02187	FALSE	-2.94366	FALSE	-2.68041	Down	0.382388	FALSE	-0.869506	FALSE
chr1	4807672	4808145	chr1:4807672-4808145	10.9507	0.0538863	FALSE	-0.707299	FALSE	0.402962	FALSE	-0.438517	FALSE	-1.17989	FALSE	-0.286801	FALSE
chr1	4814103	4814165	chr1:4814103-4814165	4.09544	1.11379	FALSE	0.808992	FALSE	1.1217	FALSE	0.177683	FALSE	-0.118466	FALSE	-1.50114	FALSE
chr1	4816106	4816184	chr1:4816106-4816184	4.8045	-0.0807881	FALSE	1.4376	FALSE	-1.35373	FALSE	-0.2109	FALSE	-0.731354	FALSE	0.916844	FALSE
chr1	4819516	4819750	chr1:4819516-4819750	29.9291	0.30123	FALSE	0.382026	FALSE	-0.626334	FALSE	-0.44481	FALSE	-0.0526301	FALSE	-0.680972	FALSE
chr1	4820936	4821076	chr1:4820936-4821076	15.0119	-0.607196	FALSE	-0.0429848	FALSE	0.335903	FALSE	0.194733	FALSE	0.604309	FALSE	-0.337475	FALSE
chr1	4842041	4842401	chr1:4842041-4842401	17.011	0.450383	FALSE	-0.229515	FALSE	0.0544173	FALSE	0.588643	FALSE	0.573056	FALSE	0.858167	FALSE
chr1	4850438	4850499	chr1:4850438-4850499	4.93178	3.01862	FALSE	1.32086	FALSE	-0.186353	FALSE	-1.75818	FALSE	0.626205	FALSE	-0.854685	FALSE
chr1	4852186	4852257	chr1:4852186-4852257	16.725	0.582824	FALSE	-0.281339	FALSE	-0.741238	FALSE	-1.21803	Down	-0.775156	FALSE	-0.946735	FALSE
chr1	4855598	4855831	chr1:4855598-4855831	110.185	0.276456	FALSE	0.0241888	FALSE	-0.0724044	FALSE	-0.118905	FALSE	-0.920887	Down	-0.28535	FALSE
chr1	4856540	4856546	chr1:4856540-4856546	14.707	-0.594373	FALSE	-0.521622	FALSE	0.276896	FALSE	0.67279	FALSE	-0.396489	FALSE	0.793397	FALSE
chr1	4857543	4857663	chr1:4857543-4857663	81.3958	0.48344	FALSE	0.0422447	FALSE	0.033339	FALSE	-0.109512	FALSE	-0.113852	FALSE	0.322913	FALSE
chr1	4862973	4863021	chr1:4862973-4863021	7.44183	-0.113678	FALSE	0.397141	FALSE	-0.966788	FALSE	-2.35231	Down	-0.633915	FALSE	-1.17153	FALSE
chr1	4866319	4866535	chr1:4866319-4866535	13.4436	0.34511	FALSE	0.48037	FALSE	-0.0163776	FALSE	0.0682034	FALSE	-0.823235	FALSE	0.0791865	FALSE
chr1	4873004	4873017	chr1:4873004-4873017	2.36097	0	FALSE	0	FALSE	-1.62753	FALSE	-1.69482	FALSE	-1.30385	FALSE	-1.86437	FALSE
chr1	4883623	4883810	chr1:4883623-4883810	3.11206	1.36377	FALSE	1.46517	FALSE	1.22621	FALSE	-0.396431	FALSE	1.49411	FALSE	0.429229	FALSE
chr1	4886883	4886895	chr1:4886883-4886895	2.35686	-1.13017	FALSE	-1.91094	FALSE	-0.887959	FALSE	-1.54597	FALSE	-0.382638	FALSE	-0.522981	FALSE
chr1	4900449	4900576	chr1:4900449-4900576	10.8741	-0.086758	FALSE	1.02842	FALSE	0.548006	FALSE	0.847262	FALSE	-0.512525	FALSE	-0.433206	FALSE
chr1	4900869	4901078	chr1:4900869-4901078	6.46743	-1.42412	FALSE	0.344237	FALSE	-1.07739	FALSE	0.157137	FALSE	-0.476878	FALSE	0.631868	FALSE
chr1	4906688	4907009	chr1:4906688-4907009	7.86498	-0.445014	FALSE	0.0872581	FALSE	-0.744692	FALSE	0.264353	FALSE	0.444419	FALSE	-0.230678	FALSE
chr1	4916196	4916207	chr1:4916196-4916207	3.7139	-0.976667	FALSE	1.48826	FALSE	0.682971	FALSE	-0.499804	FALSE	0.0920401	FALSE	-0.89558	FALSE
chr1	4931998	4932149	chr1:4931998-4932149	4.00816	-0.194848	FALSE	0.54587	FALSE	1.35768	FALSE	-1.19693	FALSE	1.00216	FALSE	0.527761	FALSE
chr1	4941632	4941694	chr1:4941632-4941694	14.6364	-0.974438	FALSE	-0.527074	FALSE	0.298782	FALSE	0.778333	FALSE	0.0571117	FALSE	0.31605	FALSE
chr1	4972548	4972594	chr1:4972548-4972594	2.02381	-0.760592	FALSE	-0.771029	FALSE	-0.554329	FALSE	-1.32042	FALSE	-1.63587	FALSE	-4.16647	Down
chr1	4998343	4998374	chr1:4998343-4998374	1.55306	0.403183	FALSE	2.45043	FALSE	2.54689	FALSE	-1.21431	FALSE	-0.279138	FALSE	0.457887	FALSE
chr1	5008083	5008109	chr1:5008083-5008109	4.98526	0.702087	FALSE	0.91042	FALSE	0.150845	FALSE	0.793959	FALSE	-0.359323	FALSE	-0.720371	FALSE
chr1	5008338	5008415	chr1:5008338-5008415	4.72467	0.676981	FALSE	1.39672	FALSE	0.875408	FALSE	0.858425	FALSE	1.32818	FALSE	-0.401791	FALSE
chr1	5019361	5019600	chr1:5019361-5019600	8.3569	-0.239518	FALSE	0.548126	FALSE	-0.359514	FALSE	0.188065	FALSE	-0.38991	FALSE	-0.465132	FALSE
chr1	5020052	5020251	chr1:5020052-5020251	4.6496	-0.442953	FALSE	0.455848	FALSE	0.203947	FALSE	-1.56098	FALSE	-0.318609	FALSE	0.404577	FALSE
chr1	5052470	5052558	chr1:5052470-5052558	3.55253	-0.337002	FALSE	0.767042	FALSE	-1.05388	FALSE	-0.350525	FALSE	1.40265	FALSE	2.84798	FALSE
chr1	5070352	5070435	chr1:5070352-5070435	4.70297	-0.956391	FALSE	-0.410811	FALSE	0.526948	FALSE	0.0222561	FALSE	-0.937437	FALSE	-2.00831	FALSE
chr1	5083026	5083574	chr1:5083026-5083574	10.6878	-0.401005	FALSE	0.774491	FALSE	-0.459984	FALSE	-0.671633	FALSE	0.283632	FALSE	-0.221849	FALSE
chr1	5102903	5102974	chr1:5102903-5102974	3.92318	0.51316	FALSE	0.503431	FALSE	0.543241	FALSE	-0.459329	FALSE	1.07113	FALSE	0.149023	FALSE
chr1	5108627	5108906	chr1:5108627-5108906	45.7085	0.265337	FALSE	-0.265445	FALSE	-0.901174	Down	-0.753018	Down	-0.090683	FALSE	0.547588	FALSE
chr1	5109338	5109657	chr1:5109338-5109657	19.8126	-0.731287	FALSE	-0.372156	FALSE	-0.18599	FALSE	-0.202085	FALSE	0.383262	FALSE	0.654489	FALSE
chr1	5110135	5110282	chr1:5110135-5110282	14.724	0.461496	FALSE	0.20222	FALSE	0.0523956	FALSE	0.53737	FALSE	-0.146766	FALSE	0.64043	FALSE
chr1	5110564	5110626	chr1:5110564-5110626	27.2506	0.0680432	FALSE	0.141921	FALSE	-0.479318	FALSE	0.0963147	FALSE	0.00792013	FALSE	-0.177125	FALSE
chr1	5129578	5129797	chr1:5129578-5129797	7.94998	-0.970575	FALSE	-0.0145354	FALSE	-0.737674	FALSE	-1.53913	FALSE	-0.59085	FALSE	0.766685	FALSE
chr1	5134956	5134961	chr1:5134956-5134961	2.67098	-2.74644	FALSE	-2.30134	FALSE	-1.77327	FALSE	-2.26264	FALSE	-2.60963	FALSE	-2.69012	FALSE
chr1	5137167	5137257	chr1:5137167-5137257	9.19837	-1.00246	FALSE	0.620298	FALSE	0.441663	FALSE	-0.492602	FALSE	-0.849458	FALSE	-0.972691	FALSE
chr1	5152328	5152436	chr1:5152328-5152436	2.89171	1.02158	FALSE	0.286016	FALSE	-0.525168	FALSE	0.849547	FALSE	-1.5072	FALSE	0.106326	FALSE
chr1	5158817	5158915	chr1:5158817-5158915	5.75377	-0.488695	FALSE	-1.77238	FALSE	-0.55277	FALSE	-0.328963	FALSE	-0.162834	FALSE	-0.431039	FALSE
chr1	5256523	5256547	chr1:5256523-5256547	1.94941	-0.0449311	FALSE	1.92796	FALSE	1.22021	FALSE	1.35865	FALSE	-0.181414	FALSE	0.994298	FALSE
chr1	5261061	5261121	chr1:5261061-5261121	4.32175	-2.19223	FALSE	0.553284	FALSE	-2.18177	FALSE	-1.39095	FALSE	-1.36334	FALSE	-1.83737	FALSE
chr1	5261382	5261532	chr1:5261382-5261532	6.43952	-2.38701	FALSE	-2.9163	FALSE	-5.59101	Down	-3.62973	Down	-2.38383	FALSE	-1.67948	FALSE
chr1	5261940	5261945	chr1:5261940-5261945	2.8878	1.38556	FALSE	-1.22072	FALSE	-3.0944	FALSE	-2.23247	FALSE	-1.28859	FALSE	-1.75125	FALSE
chr1	5295558	5295652	chr1:5295558-5295652	7.13225	-0.517624	FALSE	-0.659239	FALSE	0.348711	FALSE	0.685755	FALSE	0.0634846	FALSE	2.78849	Up
chr1	5299274	5299350	chr1:5299274-5299350	2.26189	0.710488	FALSE	-0.532724	FALSE	-0.455743	FALSE	-0.0764243	FALSE	-0.595733	FALSE	2.48758	FALSE
chr1	5307602	5307605	chr1:5307602-5307605	2.88299	0.736196	FALSE	0.945971	FALSE	3.97865	Up	1.9473	FALSE	2.60957	FALSE	0.412053	FALSE
chr1	5308524	5308549	chr1:5308524-5308549	2.53338	-0.781235	FALSE	0.813995	FALSE	0.279791	FALSE	0.456885	FALSE	1.34757	FALSE	0.796983	FALSE
chr1	5309723	5309813	chr1:5309723-5309813	4.98292	1.11737	FALSE	0.279419	FALSE	2.07587	FALSE	1.20583	FALSE	0.724892	FALSE	0.528686	FALSE
chr1	5461695	5461866	chr1:5461695-5461866	23.0259	-1.05475	FALSE	-2.48461	Down	-3.22961	Down	-1.98969	Down	-0.342293	FALSE	-0.0439769	FALSE
chr1	5484990	5485193	chr1:5484990-5485193	4.17016	0.560899	FALSE	0.966222	FALSE	0.23108	FALSE	-0.311367	FALSE	0.363399	FALSE	-0.0557019	FALSE
chr1	5491072	5491197	chr1:5491072-5491197	6.5488	-0.191454	FALSE	1.02271	FALSE	-1.43641	FALSE	-1.34506	FALSE	-1.16708	FALSE	0.482562	FALSE
chr1	5491448	5491503	chr1:5491448-5491503	2.59815	-1.12624	FALSE	-0.80665	FALSE	-1.08546	FALSE	-0.849764	FALSE	-1.06256	FALSE	1.43293	FALSE
chr1	5571141	5571233	chr1:5571141-5571233	5.42929	1.58059	FALSE	0.610829	FALSE	0.633305	FALSE	1.59885	FALSE	-0.0824041	FALSE	-0.778431	FALSE
chr1	5588400	5588421	chr1:5588400-5588421	3.40918	0.274159	FALSE	-0.776403	FALSE	-2.66411	FALSE	-1.26007	FALSE	0.306141	FALSE	-0.741291	FALSE
chr1	5594407	5594491	chr1:5594407-5594491	5.26904	0.015772	FALSE	-0.0768814	FALSE	1.91259	Up	0.864519	FALSE	1.55255	FALSE	0.996542	FALSE
chr1	5619439	5619502	chr1:5619439-5619502	5.07333	-2.81305	FALSE	-0.861433	FALSE	-0.48859	FALSE	-0.545491	FALSE	1.14337	FALSE	0.668108	FALSE
chr1	5681807	5681977	chr1:5681807-5681977	2.98379	0.329471	FALSE	-0.225248	FALSE	-1.75892	FALSE	-2.81874	Down	-3.04498	Down	-3.02345	FALSE
chr1	5704768	5704778	chr1:5704768-5704778	2.91573	1.61977	FALSE	2.4757	FALSE	2.15799	FALSE	1.34533	FALSE	-3.43496	FALSE	-0.701543	FALSE
chr1	5782633	5782859	chr1:5782633-5782859	8.51023	-1.45768	FALSE	-1.14957	FALSE	-0.738235	FALSE	0.668813	FALSE	-1.3751	FALSE	-0.245414	FALSE
chr1	5879437	5879491	chr1:5879437-5879491	4.22693	-1.40845	FALSE	-2.35782	FALSE	-0.0346936	FALSE	-0.950516	FALSE	-1.60028	FALSE	-0.929665	FALSE
chr1	5915495	5915552	chr1:5915495-5915552	6.29309	-0.326805	FALSE	0.248843	FALSE	0.591278	FALSE	0.251701	FALSE	0.747075	FALSE	-0.215739	FALSE
chr1	5916112	5916189	chr1:5916112-5916189	4.95259	-0.138951	FALSE	-0.14379	FALSE	0.0438775	FALSE	-0.0425789	FALSE	-0.488196	FALSE	-0.63133	FALSE
chr1	5917700	5917718	chr1:5917700-5917718	3.87189	-1.87342	FALSE	-1.1531	FALSE	-1.5972	FALSE	-1.47872	FALSE	-0.602046	FALSE	-0.471548	FALSE
chr1	6005848	6006056	chr1:6005848-6006056	17.3902	-1.97374	FALSE	-1.59851	FALSE	-2.01092	Down	-1.66379	Down	0.107913	FALSE	0.0129598	FALSE
chr1	6006301	6006567	chr1:6006301-6006567	15.1837	-0.893739	FALSE	-0.511395	FALSE	-2.24885	Down	-2.92197	Down	-0.250798	FALSE	-0.358851	FALSE
chr1	6017716	6017755	chr1:6017716-6017755	5.46324	-0.209232	FALSE	0.831658	FALSE	1.58901	FALSE	0.248068	FALSE	-0.337039	FALSE	0.514618	FALSE
chr1	6034951	6035093	chr1:6034951-6035093	10.0945	-0.414572	FALSE	-0.0690786	FALSE	-2.86976	Down	-2.4481	Down	-1.51027	FALSE	-1.10809	FALSE
chr1	6040180	6040318	chr1:6040180-6040318	8.26355	-1.02062	FALSE	-0.901814	FALSE	-0.62186	FALSE	-0.631263	FALSE	-0.576008	FALSE	0.623904	FALSE
chr1	6052233	6052282	chr1:6052233-6052282	2.62922	-0.131736	FALSE	2.49044	FALSE	-0.895284	FALSE	-2.28681	FALSE	0.415654	FALSE	-0.388135	FALSE
chr1	6059197	6059322	chr1:6059197-6059322	7.73956	-0.15725	FALSE	-1.70713	FALSE	-4.04974	Down	-5.01008	Down	-2.30528	Down	-2.16888	Down
chr1	6061400	6061652	chr1:6061400-6061652	23.6942	-0.0899998	FALSE	0.225259	FALSE	-0.547318	FALSE	-1.17722	Down	-0.857307	FALSE	-0.934612	FALSE
chr1	6091798	6091964	chr1:6091798-6091964	5.65276	1.03361	FALSE	0.781497	FALSE	-0.0314249	FALSE	-0.267794	FALSE	0.989654	FALSE	0.122034	FALSE
chr1	6117661	6117766	chr1:6117661-6117766	2.16722	0.929208	FALSE	-0.494782	FALSE	-3.42912	FALSE	-1.39728	FALSE	-0.0100867	FALSE	-2.64252	FALSE
chr1	6133018	6133218	chr1:6133018-6133218	13.6969	0.15479	FALSE	1.56982	FALSE	-0.202508	FALSE	1.14722	Up	-0.196658	FALSE	0.310671	FALSE
chr1	6135246	6135288	chr1:6135246-6135288	5.12856	-0.296105	FALSE	-1.10033	FALSE	-1.00873	FALSE	-1.30261	FALSE	-0.275186	FALSE	0.601629	FALSE
chr1	6142922	6143100	chr1:6142922-6143100	13.2265	-1.19436	FALSE	-1.00477	FALSE	-1.79116	Down	-2.82961	Down	-1.17137	FALSE	-1.07843	Down
chr1	6152630	6152641	chr1:6152630-6152641	6.23499	0.641462	FALSE	0.297884	FALSE	1.08157	FALSE	0.551263	FALSE	-0.5604	FALSE	0.337195	FALSE
chr1	6156389	6156404	chr1:6156389-6156404	5.13234	-0.720841	FALSE	-0.663669	FALSE	0.648509	FALSE	0.207414	FALSE	-0.730796	FALSE	1.24764	FALSE
chr1	6157829	6158282	chr1:6157829-6158282	7.51349	-0.222837	FALSE	0.979192	FALSE	0.0605841	FALSE	1.29506	FALSE	0.439764	FALSE	-1.92514	FALSE
chr1	6161091	6161481	chr1:6161091-6161481	21.7845	0.133508	FALSE	0.742603	FALSE	0.420907	FALSE	0.519973	FALSE	-0.532223	FALSE	-0.859091	FALSE
chr1	6166802	6166843	chr1:6166802-6166843	5.40196	0.105839	FALSE	0.516351	FALSE	0.412025	FALSE	-0.0163019	FALSE	0.961639	FALSE	-0.316947	FALSE
chr1	6188438	6188704	chr1:6188438-6188704	52.5026	-0.224719	FALSE	-0.140592	FALSE	0.862275	Up	0.195054	FALSE	0.419523	FALSE	0.630066	FALSE
chr1	6194877	6195059	chr1:6194877-6195059	13.9598	0.213088	FALSE	0.783432	FALSE	0.797186	FALSE	1.75011	Up	0.240194	FALSE	1.29967	FALSE
chr1	6195432	6195674	chr1:6195432-6195674	10.0111	-0.853799	FALSE	0.566119	FALSE	1.01603	FALSE	0.697585	FALSE	1.11694	FALSE	0.0904288	FALSE
chr1	6210841	6210997	chr1:6210841-6210997	31.8245	0.12183	FALSE	0.49552	FALSE	0.820141	FALSE	0.54617	FALSE	-0.299515	FALSE	0.486583	FALSE
chr1	6214193	6214659	chr1:6214193-6214659	21.2625	0.0297532	FALSE	0.336094	FALSE	-0.0212974	FALSE	-0.500291	FALSE	0.0868078	FALSE	-0.0154589	FALSE
chr1	6214923	6214947	chr1:6214923-6214947	14.7259	0.00742543	FALSE	0.450476	FALSE	-0.493027	FALSE	-0.81999	FALSE	-0.434058	FALSE	0.0725078	FALSE
chr1	6218776	6218827	chr1:6218776-6218827	11.0213	0.450371	FALSE	0.688325	FALSE	-0.220973	FALSE	-0.119376	FALSE	0.090953	FALSE	-0.357352	FALSE
chr1	6222753	6222892	chr1:6222753-6222892	32.8541	-0.435189	FALSE	0.642899	FALSE	0.57645	FALSE	1.20912	Up	-0.225201	FALSE	0.637957	FALSE
chr1	6246658	6246751	chr1:6246658-6246751	2.12531	2.48251	FALSE	-0.790398	FALSE	-0.547524	FALSE	-1.90115	FALSE	-1.18578	FALSE	3.0103	FALSE
chr1	6262430	6262518	chr1:6262430-6262518	5.04791	-1.41224	FALSE	0.116592	FALSE	-0.109161	FALSE	0.233506	FALSE	0.162366	FALSE	0.781768	FALSE
chr1	6272390	6272468	chr1:6272390-6272468	6.10521	0.75681	FALSE	-0.153276	FALSE	0.0419035	FALSE	0.128661	FALSE	-0.550395	FALSE	-0.78002	FALSE
chr1	6282632	6282695	chr1:6282632-6282695	5.47169	-0.20986	FALSE	-0.719039	FALSE	-1.24912	FALSE	-0.458684	FALSE	-0.359213	FALSE	-0.534645	FALSE
chr1	6283074	6283077	chr1:6283074-6283077	3.62211	-3.75224	FALSE	-0.692871	FALSE	-0.437153	FALSE	-0.108026	FALSE	-0.357034	FALSE	0.0250527	FALSE
chr1	6293261	6293296	chr1:6293261-6293296	3.51079	0.219524	FALSE	1.26586	FALSE	-1.05093	FALSE	-0.294863	FALSE	1.90165	FALSE	1.04023	FALSE
chr1	6293553	6293569	chr1:6293553-6293569	2.70465	2.6504	FALSE	0.521629	FALSE	0.444402	FALSE	-1.66785	FALSE	0.491533	FALSE	-3.39164	FALSE
chr1	6309711	6309721	chr1:6309711-6309721	2.55714	4.67182	FALSE	1.89424	FALSE	-0.756012	FALSE	1.68248	FALSE	0.0713968	FALSE	-1.04063	FALSE
chr1	6312104	6312145	chr1:6312104-6312145	3.12873	0.461214	FALSE	-0.275093	FALSE	-1.11559	FALSE	-2.12473	FALSE	0.328028	FALSE	0.805099	FALSE
chr1	6382722	6382962	chr1:6382722-6382962	8.81279	1.71487	FALSE	-0.442532	FALSE	0.292461	FALSE	0.047511	FALSE	-0.712031	FALSE	0.152664	FALSE
chr1	6424029	6424075	chr1:6424029-6424075	2.3382	-0.2929	FALSE	0.755229	FALSE	1.00114	FALSE	-1.02663	FALSE	1.42348	FALSE	0.750272	FALSE
chr1	6441613	6441650	chr1:6441613-6441650	3.58783	-0.64882	FALSE	0.28241	FALSE	1.16829	FALSE	0.294692	FALSE	-0.870119	FALSE	-0.305046	FALSE
chr1	6448944	6449248	chr1:6448944-6449248	5.04128	-3.53789	FALSE	-2.04244	FALSE	-5.13365	Down	-3.71509	Down	-1.69571	FALSE	-2.56786	Down
chr1	6465085	6465165	chr1:6465085-6465165	2.79897	-1.44949	FALSE	1.28398	FALSE	-1.04789	FALSE	-0.469415	FALSE	0.0288479	FALSE	-0.87597	FALSE
chr1	6471252	6471333	chr1:6471252-6471333	2.84697	0.857842	FALSE	0.252109	FALSE	1.00114	FALSE	-1.11005	FALSE	0.290395	FALSE	-1.10551	FALSE
chr1	6928339	6928371	chr1:6928339-6928371	2.22082	1.60225	FALSE	-0.777849	FALSE	1.2372	FALSE	2.20036	FALSE	-0.121368	FALSE	0.36292	FALSE
chr1	6939859	6939904	chr1:6939859-6939904	4.75405	0.53496	FALSE	0.211175	FALSE	0.816773	FALSE	0.55389	FALSE	-0.905954	FALSE	-0.999092	FALSE
chr1	6959822	6960006	chr1:6959822-6960006	3.99166	0.176545	FALSE	0.452616	FALSE	1.43925	FALSE	0.604507	FALSE	1.20582	FALSE	-1.45315	FALSE
chr1	6973900	6973926	chr1:6973900-6973926	2.56247	0	FALSE	-2.22991	FALSE	1.0829	FALSE	0.0903512	FALSE	-1.42964	FALSE	-1.37723	FALSE
chr1	6984265	6984608	chr1:6984265-6984608	10.2331	-1.93315	FALSE	-1.39639	FALSE	-0.693386	FALSE	-2.17709	Down	-2.01443	FALSE	-1.60046	FALSE
chr1	6985163	6985195	chr1:6985163-6985195	5.07805	-0.954488	FALSE	-2.62958	FALSE	0.600858	FALSE	0.210302	FALSE	1.12906	FALSE	-0.487237	FALSE
chr1	6990158	6990178	chr1:6990158-6990178	104.126	0.384936	FALSE	0.287272	FALSE	0.299242	FALSE	-0.122944	FALSE	-0.353524	FALSE	-0.43532	FALSE
chr1	6997714	6997820	chr1:6997714-6997820	8.85748	-0.501047	FALSE	-0.334864	FALSE	0.485907	FALSE	-0.635841	FALSE	0.0756785	FALSE	-1.04416	FALSE
chr1	6998329	6998638	chr1:6998329-6998638	15.123	0.043938	FALSE	-0.137565	FALSE	1.14919	FALSE	1.1145	Up	-0.203865	FALSE	0.37421	FALSE
chr1	7010294	7010474	chr1:7010294-7010474	10.7865	-1.12026	FALSE	-1.12952	FALSE	-0.83947	FALSE	-0.923713	FALSE	-1.60992	FALSE	-1.28044	FALSE
chr1	7010957	7011088	chr1:7010957-7011088	9.83353	-0.417508	FALSE	-0.648461	FALSE	-2.02658	Down	-1.45586	Down	-1.07677	FALSE	-1.99454	Down
chr1	7012657	7012750	chr1:7012657-7012750	17.0241	-0.532581	FALSE	-0.533266	FALSE	0.0032457	FALSE	-0.940982	FALSE	-1.22362	FALSE	-2.48384	Down
chr1	7013633	7013673	chr1:7013633-7013673	5.62924	-1.22202	FALSE	-0.626836	FALSE	0.209415	FALSE	-0.923706	FALSE	0.483739	FALSE	-1.25318	FALSE
chr1	7026728	7026768	chr1:7026728-7026768	2.52988	-0.762567	FALSE	-2.04919	FALSE	0.152013	FALSE	0.510687	FALSE	-0.961763	FALSE	0.603577	FALSE
chr1	7031153	7031273	chr1:7031153-7031273	8.50308	-1.55801	FALSE	-0.85097	FALSE	-1.4963	FALSE	-1.67277	Down	-1.36529	FALSE	-0.85046	FALSE
chr1	7032199	7032245	chr1:7032199-7032245	3.91203	1.12686	FALSE	0.622219	FALSE	-0.340913	FALSE	-0.450384	FALSE	0.593465	FALSE	-0.6951	FALSE
chr1	7032504	7032695	chr1:7032504-7032695	5.10526	1.99448	FALSE	-0.526006	FALSE	-0.499279	FALSE	-2.10756	Down	-0.622171	FALSE	1.04278	FALSE
chr1	7045043	7045223	chr1:7045043-7045223	34.9461	-0.831734	FALSE	-0.112686	FALSE	-0.436904	FALSE	0.0959334	FALSE	-0.429443	FALSE	0.329762	FALSE
chr1	7045445	7045509	chr1:7045445-7045509	44.6055	-0.252338	FALSE	0.135491	FALSE	0.135364	FALSE	0.397856	FALSE	-0.666025	FALSE	-0.0199023	FALSE
chr1	7047410	7047503	chr1:7047410-7047503	12.8583	-2.2706	FALSE	-3.30003	Down	-1.74861	Down	-2.18932	Down	-0.755151	FALSE	-0.78279	FALSE
chr1	7050488	7050688	chr1:7050488-7050688	25.626	-0.21418	FALSE	-0.111	FALSE	-0.644056	FALSE	0.102574	FALSE	-0.903212	FALSE	0.932817	FALSE
chr1	7051334	7051392	chr1:7051334-7051392	8.195	0.529487	FALSE	0.479757	FALSE	0.0146147	FALSE	1.11059	FALSE	-0.72274	FALSE	1.25527	FALSE
chr1	7052507	7052548	chr1:7052507-7052548	3.17757	-1.12523	FALSE	-3.4062	FALSE	-1.4045	FALSE	-0.912512	FALSE	-1.91287	FALSE	-1.33948	FALSE
chr1	7052862	7053013	chr1:7052862-7053013	8.49382	-0.1644	FALSE	-1.55964	FALSE	-1.0314	FALSE	-0.122932	FALSE	-1.02122	FALSE	0.796358	FALSE
chr1	7068718	7069048	chr1:7068718-7069048	17.3124	-2.23785	FALSE	-3.78764	Down	-2.37825	Down	-4.06202	Down	-2.53723	Down	-1.82824	Down
chr1	7070211	7070279	chr1:7070211-7070279	7.33164	-3.23083	FALSE	-5.25019	Down	-2.27174	Down	-5.41208	Down	-1.18695	FALSE	-2.55686	Down
chr1	7073104	7073197	chr1:7073104-7073197	8.6739	0.153049	FALSE	-1.2119	FALSE	-1.76764	Down	-1.81498	Down	-1.09664	FALSE	-1.20054	FALSE
chr1	7088735	7088942	chr1:7088735-7088942	86.8246	-0.211773	FALSE	-0.117815	FALSE	0.337724	FALSE	0.186523	FALSE	-0.212946	FALSE	0.172636	FALSE
chr1	7094401	7094524	chr1:7094401-7094524	16.112	-0.487161	FALSE	-0.993394	FALSE	-0.360903	FALSE	0.828243	FALSE	-0.118938	FALSE	0.0833115	FALSE
chr1	7098391	7098499	chr1:7098391-7098499	7.85116	0.761662	FALSE	-1.48376	FALSE	-0.867332	FALSE	0.0752959	FALSE	0.641051	FALSE	-1.45327	FALSE
chr1	7101666	7101700	chr1:7101666-7101700	2.92048	1.82699	FALSE	-1.50148	FALSE	-0.504623	FALSE	-2.40837	FALSE	-2.26426	FALSE	-1.74076	FALSE
chr1	7103805	7103828	chr1:7103805-7103828	4.64328	-1.48703	FALSE	-1.27937	FALSE	-4.8891	Down	-1.29708	FALSE	-2.1413	FALSE	-1.40702	FALSE
chr1	7105954	7106169	chr1:7105954-7106169	4.83671	0.257275	FALSE	-0.95358	FALSE	-2.68339	Down	-2.28471	Down	-2.19223	FALSE	-1.73066	FALSE
chr1	7109844	7109876	chr1:7109844-7109876	4.06889	-0.968544	FALSE	1.444	FALSE	-1.00295	FALSE	0.948491	FALSE	-1.43912	FALSE	0.0903877	FALSE
chr1	7114673	7114825	chr1:7114673-7114825	8.46969	-0.624439	FALSE	-0.0942308	FALSE	1.53336	FALSE	0.303253	FALSE	0.293724	FALSE	1.35831	FALSE
chr1	7116907	7116988	chr1:7116907-7116988	6.49878	-4.64835	FALSE	1.45818	FALSE	-1.92512	FALSE	-1.48853	FALSE	0.034949	FALSE	-0.216912	FALSE
chr1	7119578	7119580	chr1:7119578-7119580	3.6659	0	FALSE	2.1353	FALSE	-1.10115	FALSE	-2.1445	FALSE	-0.0334566	FALSE	-1.64467	FALSE
chr1	7124885	7124971	chr1:7124885-7124971	29.2637	-0.312722	FALSE	-1.33704	FALSE	-1.10182	FALSE	-2.9689	Down	-1.84642	Down	-2.2614	Down
chr1	7125181	7125285	chr1:7125181-7125285	14.8034	-0.402504	FALSE	-3.67026	Down	-3.28897	Down	-3.86872	Down	-2.84052	Down	-2.15643	Down
chr1	7126055	7126283	chr1:7126055-7126283	51.8044	-0.634818	FALSE	-1.87777	Down	-1.51911	Down	-2.16111	Down	-0.754452	FALSE	-0.502091	FALSE
chr1	7126486	7126524	chr1:7126486-7126524	6.56953	-0.368481	FALSE	-1.90937	FALSE	-0.790754	FALSE	-2.0678	FALSE	-0.251313	FALSE	-0.618921	FALSE
chr1	7129978	7130073	chr1:7129978-7130073	23.3228	-0.31434	FALSE	0.429112	FALSE	-2.50255	Down	-2.35812	Down	-2.10735	Down	-2.66694	Down
chr1	7133457	7133491	chr1:7133457-7133491	5.34341	-1.13198	FALSE	-0.201291	FALSE	-1.48703	FALSE	-2.27597	Down	-2.66494	FALSE	-2.60367	Down
chr1	7138441	7138485	chr1:7138441-7138485	4.10558	2.86121	FALSE	-2.29631	FALSE	-1.64581	FALSE	-1.89888	Down	-0.438628	FALSE	0.0423326	FALSE
chr1	7139671	7139765	chr1:7139671-7139765	3.47379	-1.58414	FALSE	0.0038699	FALSE	-0.827066	FALSE	-1.89549	FALSE	-1.09292	FALSE	-1.48769	FALSE
chr1	7143669	7143730	chr1:7143669-7143730	3.2058	-0.803647	FALSE	-0.276657	FALSE	-2.40954	FALSE	-1.94039	FALSE	-3.10278	FALSE	0.0550961	FALSE
chr1	7148432	7148487	chr1:7148432-7148487	2.59257	-0.277354	FALSE	-0.221435	FALSE	-0.0447324	FALSE	-1.69353	FALSE	-2.44787	FALSE	-0.520206	FALSE
chr1	7152770	7152921	chr1:7152770-7152921	5.52358	-0.423215	FALSE	-1.59193	FALSE	0.483967	FALSE	-0.203475	FALSE	-0.180023	FALSE	-0.192526	FALSE
chr1	7158784	7158824	chr1:7158784-7158824	1.87841	0	FALSE	2.63485	FALSE	-1.6582	FALSE	-3.34321	FALSE	-1.38099	FALSE	-0.958006	FALSE
chr1	7164532	7164679	chr1:7164532-7164679	24.0361	-0.182943	FALSE	-0.679327	FALSE	-0.531844	FALSE	-0.640957	FALSE	-0.805444	FALSE	0.371383	FALSE
chr1	7165452	7165520	chr1:7165452-7165520	4.38907	0.19141	FALSE	-1.75402	FALSE	-0.857922	FALSE	-0.889314	FALSE	-1.24806	FALSE	1.6821	FALSE
chr1	7175943	7176029	chr1:7175943-7176029	4.34633	-1.06453	FALSE	-3.59366	FALSE	-0.996182	FALSE	-3.07241	Down	-1.76626	FALSE	-1.82399	FALSE
chr1	7206199	7206849	chr1:7206199-7206849	16.4315	-0.852167	FALSE	-0.908479	FALSE	-1.4785	Down	-1.82999	Down	-0.031134	FALSE	-0.564755	FALSE
chr1	7207241	7207348	chr1:7207241-7207348	29.1895	-0.704287	FALSE	-1.96994	Down	-1.99644	Down	-2.34916	Down	-0.490379	FALSE	-0.790426	FALSE
chr1	7207806	7207823	chr1:7207806-7207823	7.41556	-1.36047	FALSE	-1.49124	FALSE	-2.07043	Down	-4.8123	Down	-2.08999	FALSE	-2.3813	Down
chr1	7217266	7217476	chr1:7217266-7217476	6.33518	1.71945	FALSE	-0.462482	FALSE	-0.937386	FALSE	-0.44127	FALSE	-1.15333	FALSE	-0.192477	FALSE
chr1	7291825	7291892	chr1:7291825-7291892	12.8536	0.0534687	FALSE	0.44094	FALSE	0.0825681	FALSE	-0.174384	FALSE	-0.783596	FALSE	-0.126317	FALSE
chr1	7298985	7299519	chr1:7298985-7299519	5.78052	0.141053	FALSE	1.12923	FALSE	-0.0965303	FALSE	-1.30028	FALSE	-2.58573	Down	-1.95013	FALSE
chr1	7312559	7312677	chr1:7312559-7312677	14.7996	-0.241551	FALSE	0.946723	FALSE	-1.20119	FALSE	-1.52277	Down	-2.15586	Down	-2.93453	Down
chr1	7338812	7338816	chr1:7338812-7338816	2.27563	1.15511	FALSE	-0.423879	FALSE	1.53793	FALSE	-0.512215	FALSE	-1.0902	FALSE	-0.26306	FALSE
chr1	7373357	7373559	chr1:7373357-7373559	6.41091	-0.378019	FALSE	-0.469413	FALSE	0.539574	FALSE	1.5298	Up	0.851202	FALSE	1.54955	FALSE
chr1	7392051	7392081	chr1:7392051-7392081	4.0441	1.28393	FALSE	1.96221	FALSE	0.505524	FALSE	-1.2922	FALSE	-1.25105	FALSE	-1.66325	FALSE
chr1	7397671	7397711	chr1:7397671-7397711	22.5564	0.662617	FALSE	-0.398062	FALSE	0.00478475	FALSE	-0.151078	FALSE	-0.0540772	FALSE	0.605989	FALSE
chr1	7397936	7398149	chr1:7397936-7398149	80.7436	-0.212533	FALSE	-0.00495607	FALSE	0.206785	FALSE	-0.0708033	FALSE	0.317024	FALSE	0.325711	FALSE
chr1	7451729	7452005	chr1:7451729-7452005	3.16104	1.23603	FALSE	1.69859	FALSE	-2.49076	FALSE	-6.06563	Down	-3.5329	FALSE	-5.80636	Down
chr1	7464261	7464298	chr1:7464261-7464298	2.99984	0.485746	FALSE	0.269439	FALSE	-0.23842	FALSE	-0.671898	FALSE	-0.695877	FALSE	0.624358	FALSE
chr1	7488454	7488627	chr1:7488454-7488627	3.15507	1.54145	FALSE	-1.18455	FALSE	-1.24931	FALSE	0.0233939	FALSE	-0.132733	FALSE	-0.85495	FALSE
chr1	7494254	7494286	chr1:7494254-7494286	4.4373	0	FALSE	-2.82346	FALSE	-3.2091	FALSE	-5.95731	Down	-1.68132	FALSE	-2.75525	Down
chr1	7497671	7497785	chr1:7497671-7497785	27.5709	-1.22077	FALSE	-1.98179	Down	-2.13488	Down	-2.47187	Down	-0.562731	FALSE	-0.557053	FALSE
chr1	7498665	7498811	chr1:7498665-7498811	18.423	-0.896803	FALSE	-0.0128349	FALSE	-1.25165	Down	-0.643944	FALSE	-0.474829	FALSE	-0.0913832	FALSE
chr1	7499156	7499236	chr1:7499156-7499236	10.4468	0.246255	FALSE	0.500093	FALSE	-1.26537	FALSE	-0.402449	FALSE	-0.886095	FALSE	-0.144967	FALSE
chr1	7502506	7502679	chr1:7502506-7502679	16.5694	-1.73403	FALSE	-2.37171	Down	-0.881438	FALSE	-0.464423	FALSE	-1.13172	FALSE	0.330015	FALSE
chr1	7508891	7508967	chr1:7508891-7508967	3.18547	-0.243386	FALSE	0.425797	FALSE	-1.30337	FALSE	-0.295361	FALSE	0.586441	FALSE	-1.33946	FALSE
chr1	7518889	7518991	chr1:7518889-7518991	5.71858	-0.916263	FALSE	1.01587	FALSE	-2.32422	FALSE	-2.65294	Down	-1.57417	FALSE	-2.21843	Down
chr1	7533685	7533708	chr1:7533685-7533708	4.23028	-3.4735	FALSE	-1.5931	FALSE	-3.04488	FALSE	-2.58584	FALSE	-0.00897585	FALSE	-2.46985	FALSE
chr1	7542997	7543086	chr1:7542997-7543086	2.78288	0.212882	FALSE	-0.535051	FALSE	0.707961	FALSE	-0.527305	FALSE	-0.759066	FALSE	-3.0227	Down
chr1	7620560	7620768	chr1:7620560-7620768	3.44606	0.632595	FALSE	-0.945678	FALSE	-3.22541	FALSE	-3.06578	FALSE	-2.81504	FALSE	-2.70601	Down
chr1	7637992	7638097	chr1:7637992-7638097	3.79146	0.122722	FALSE	-0.561399	FALSE	-0.0613858	FALSE	0.987572	FALSE	0.181297	FALSE	1.03587	FALSE
chr1	7638320	7638540	chr1:7638320-7638540	17.1738	-0.0462933	FALSE	0.0454823	FALSE	-0.186244	FALSE	0.160629	FALSE	-0.409564	FALSE	0.608765	FALSE
chr1	7668637	7668657	chr1:7668637-7668657	3.29703	0.634483	FALSE	-0.19408	FALSE	-0.578608	FALSE	-3.84545	Down	0.220182	FALSE	-2.03677	FALSE
chr1	7671657	7671918	chr1:7671657-7671918	7.32413	-1.66339	FALSE	0.631333	FALSE	-2.60272	Down	-4.64581	Down	-2.48313	FALSE	-5.51058	Down
chr1	7725585	7725609	chr1:7725585-7725609	2.99813	-0.155184	FALSE	0.092096	FALSE	-0.29173	FALSE	1.51655	FALSE	-1.09304	FALSE	0.74685	FALSE
chr1	7785686	7785697	chr1:7785686-7785697	1.76898	-1.90875	FALSE	-2.27908	FALSE	2.67064	FALSE	-2.24	FALSE	-0.182065	FALSE	-0.724275	FALSE
chr1	7971423	7971639	chr1:7971423-7971639	5.25405	-3.2888	FALSE	-1.97405	FALSE	0.483489	FALSE	1.34139	FALSE	-1.75197	FALSE	0.855894	FALSE
chr1	8097157	8097295	chr1:8097157-8097295	3.5067	0.756789	FALSE	-0.71957	FALSE	-0.0322471	FALSE	-1.06055	FALSE	-1.28695	FALSE	-2.82208	Down
chr1	8134587	8134659	chr1:8134587-8134659	2.4486	-0.357185	FALSE	-1.28586	FALSE	0.991893	FALSE	1.2342	FALSE	-2.40972	FALSE	1.49191	FALSE
chr1	8261885	8261921	chr1:8261885-8261921	3.33066	-0.118176	FALSE	-0.355807	FALSE	-0.0110027	FALSE	1.86689	FALSE	-0.901516	FALSE	1.1779	FALSE
chr1	8270575	8270642	chr1:8270575-8270642	9.95193	0.838527	FALSE	0.401674	FALSE	0.66324	FALSE	1.84989	Up	-1.84975	FALSE	-0.435364	FALSE
chr1	8271330	8271377	chr1:8271330-8271377	2.67894	0.18945	FALSE	0.380038	FALSE	1.05128	FALSE	-0.226665	FALSE	0.731979	FALSE	2.67166	FALSE
chr1	8432018	8432042	chr1:8432018-8432042	2.80583	-0.0289888	FALSE	0.850701	FALSE	0.24368	FALSE	0.862149	FALSE	-0.289018	FALSE	0.432883	FALSE
chr1	8477368	8477436	chr1:8477368-8477436	1.74053	-1.10294	FALSE	-1.97843	FALSE	-2.04637	FALSE	-2.20361	FALSE	-0.393639	FALSE	-4.0331	FALSE
chr1	8533638	8534033	chr1:8533638-8534033	2.61619	-3.3858	FALSE	-0.783024	FALSE	-1.53775	FALSE	-2.12767	Down	-2.26925	FALSE	-2.1502	FALSE
chr1	8536276	8536362	chr1:8536276-8536362	6.53828	-1.95437	FALSE	-2.19757	FALSE	-1.42599	FALSE	-2.28838	Down	-0.0408754	FALSE	-0.331176	FALSE
chr1	8573841	8573899	chr1:8573841-8573899	3.28285	1.51568	FALSE	0.652641	FALSE	-3.12436	FALSE	-5.07993	Down	-1.1635	FALSE	-2.07009	FALSE
chr1	8581934	8582162	chr1:8581934-8582162	22.0459	-0.890343	FALSE	-2.9099	FALSE	-2.61121	Down	-4.15023	Down	-4.99007	Down	-4.3999	Down
chr1	8613749	8613822	chr1:8613749-8613822	3.36745	2.16262	FALSE	0.790981	FALSE	-0.864516	FALSE	-2.5453	FALSE	1.22029	FALSE	-1.49465	FALSE
chr1	8625652	8625704	chr1:8625652-8625704	2.72711	0.344726	FALSE	-0.152721	FALSE	0.501917	FALSE	-4.24577	Down	1.50376	FALSE	-2.94277	FALSE
chr1	8757566	8757716	chr1:8757566-8757716	9.16341	1.12255	FALSE	1.10791	FALSE	0.950362	FALSE	0.716411	FALSE	-1.20113	FALSE	-1.04481	FALSE
chr1	8758570	8758588	chr1:8758570-8758588	1.8451	0.503447	FALSE	2.18195	FALSE	-0.306941	FALSE	-0.999337	FALSE	-1.86722	FALSE	2.2191	FALSE
chr1	8770220	8770313	chr1:8770220-8770313	6.0736	1.47754	FALSE	0.642396	FALSE	-0.254	FALSE	0.936837	FALSE	-0.790975	FALSE	-0.916664	FALSE
chr1	8775601	8775777	chr1:8775601-8775777	13.4967	0.147712	FALSE	0.463548	FALSE	-0.580167	FALSE	-1.81822	Down	-2.32933	Down	-1.65306	Down
chr1	8848853	8848910	chr1:8848853-8848910	3.32106	0.675917	FALSE	1.43026	FALSE	1.10589	FALSE	1.0231	FALSE	-0.55119	FALSE	3.29276	FALSE
chr1	8859304	8859435	chr1:8859304-8859435	5.45099	-0.7647	FALSE	-0.550389	FALSE	0.0498765	FALSE	-0.488977	FALSE	0.250071	FALSE	-0.0435106	FALSE
chr1	8913884	8914004	chr1:8913884-8914004	6.05682	-0.790142	FALSE	-0.736999	FALSE	0.085023	FALSE	-0.691573	FALSE	0.048145	FALSE	0.340142	FALSE
chr1	8925088	8925257	chr1:8925088-8925257	20.0877	-0.857317	FALSE	-0.0321468	FALSE	-0.576298	FALSE	-1.37989	Down	-0.749638	FALSE	-0.925919	FALSE
chr1	8936160	8936289	chr1:8936160-8936289	58.3828	0.458276	FALSE	0.32973	FALSE	0.0803229	FALSE	-0.218523	FALSE	-0.521497	FALSE	-0.11791	FALSE
chr1	8938037	8938094	chr1:8938037-8938094	13.054	-0.0108087	FALSE	0.351527	FALSE	-0.368945	FALSE	-0.860954	FALSE	-1.62582	FALSE	-1.07744	FALSE
chr1	8940894	8941047	chr1:8940894-8941047	27.1075	-0.46451	FALSE	-2.81526	Down	-2.25438	Down	-3.46339	Down	-1.34099	FALSE	-1.42373	FALSE
chr1	8941511	8941647	chr1:8941511-8941647	23.8718	-0.223068	FALSE	0.00618566	FALSE	-0.4634	FALSE	-1.23289	Down	-0.314877	FALSE	-0.785906	FALSE
chr1	8946588	8946755	chr1:8946588-8946755	5.22608	-1.9963	FALSE	2.96997	FALSE	-1.52184	FALSE	-1.45227	FALSE	-1.4854	FALSE	-1.42386	FALSE
chr1	8946966	8947307	chr1:8946966-8947307	6.0544	-2.12243	FALSE	-0.405841	FALSE	-1.22303	FALSE	-1.95824	Down	-0.199735	FALSE	-1.46643	FALSE
chr1	8948319	8948432	chr1:8948319-8948432	6.22	3.06278	FALSE	-0.571858	FALSE	-1.58881	FALSE	-2.75449	Down	-1.32799	FALSE	-2.78503	Down
chr1	8960023	8960143	chr1:8960023-8960143	6.18642	-0.114773	FALSE	0.525626	FALSE	-0.367698	FALSE	-1.07268	FALSE	-0.833039	FALSE	-0.17321	FALSE
chr1	9127901	9128003	chr1:9127901-9128003	5.28106	-0.542448	FALSE	-1.40677	FALSE	0.220795	FALSE	1.10756	FALSE	-0.0793145	FALSE	0.415688	FALSE
chr1	9298529	9298593	chr1:9298529-9298593	3.11434	1.48568	FALSE	-0.645902	FALSE	-3.33614	FALSE	-1.50359	FALSE	0.247018	FALSE	-0.749399	FALSE
chr1	9299332	9299358	chr1:9299332-9299358	3.24072	-0.533329	FALSE	-0.373163	FALSE	-0.692798	FALSE	-0.0154332	FALSE	-0.660365	FALSE	-0.322006	FALSE
chr1	9313200	9313832	chr1:9313200-9313832	6.45585	-1.68846	FALSE	1.30241	FALSE	-0.300047	FALSE	-0.551445	FALSE	0.21936	FALSE	-0.802079	FALSE
chr1	9347449	9347588	chr1:9347449-9347588	51.1551	0.373652	FALSE	0.358141	FALSE	0.603426	FALSE	0.111991	FALSE	-0.0256444	FALSE	0.00194638	FALSE
chr1	9350111	9350344	chr1:9350111-9350344	20.6449	0.598795	FALSE	-0.0489657	FALSE	0.285694	FALSE	-0.105652	FALSE	-1.39416	FALSE	-0.284252	FALSE
chr1	9365734	9365803	chr1:9365734-9365803	9.85852	0.423778	FALSE	-1.45783	FALSE	-1.77271	Down	-1.74015	Down	-0.10626	FALSE	-0.368478	FALSE
chr1	9367393	9367642	chr1:9367393-9367642	57.5254	0.338197	FALSE	-0.137108	FALSE	-0.743837	FALSE	-0.985816	Down	0.0568757	FALSE	-0.12913	FALSE
chr1	9372330	9372441	chr1:9372330-9372441	22.4222	-0.700902	FALSE	-0.682518	FALSE	-1.47232	Down	-0.0232578	FALSE	-0.172293	FALSE	-0.546924	FALSE
chr1	9374020	9374103	chr1:9374020-9374103	4.14765	0.389676	FALSE	0.269685	FALSE	-0.525411	FALSE	0.604	FALSE	-1.01401	FALSE	-0.82588	FALSE
chr1	9380354	9380516	chr1:9380354-9380516	7.16983	0.961159	FALSE	-0.788687	FALSE	2.26547	FALSE	1.47901	FALSE	0.396118	FALSE	0.0382729	FALSE
chr1	9381084	9381169	chr1:9381084-9381169	4.21112	1.30194	FALSE	-0.544304	FALSE	-0.450764	FALSE	0.835884	FALSE	0.678139	FALSE	1.61117	FALSE
chr1	9397646	9397749	chr1:9397646-9397749	2.64257	-0.628038	FALSE	0.0807602	FALSE	-0.166014	FALSE	-3.53085	Down	0.0583126	FALSE	-1.50733	FALSE
chr1	9408307	9408338	chr1:9408307-9408338	2.50239	1.84784	FALSE	-1.3485	FALSE	0.642055	FALSE	1.11001	FALSE	-1.30056	FALSE	-0.550071	FALSE
chr1	9432778	9432923	chr1:9432778-9432923	3.36784	-0.640195	FALSE	0.548909	FALSE	-2.67248	FALSE	-3.88748	Down	-1.71828	FALSE	-0.214631	FALSE
chr1	9441795	9441900	chr1:9441795-9441900	19.2123	-0.958435	FALSE	-1.82889	FALSE	-3.71037	Down	-2.64765	Down	-0.701612	FALSE	-0.491562	FALSE
chr1	9442145	9442218	chr1:9442145-9442218	27.7741	-1.15971	FALSE	0.232837	FALSE	-4.18373	Down	-3.8101	Down	-1.32955	Down	-0.924284	Down
chr1	9442757	9442794	chr1:9442757-9442794	4.3251	2.2546	FALSE	-0.720014	FALSE	-5.3534	Down	-5.52737	Down	-2.23797	FALSE	-2.90408	Down
chr1	9443062	9443175	chr1:9443062-9443175	8.25919	-1.37971	FALSE	-1.05741	FALSE	-4.70372	Down	-3.96702	Down	-1.99543	Down	-2.33704	Down
chr1	9446180	9446192	chr1:9446180-9446192	1.86385	0.616298	FALSE	2.28668	FALSE	-0.782583	FALSE	-1.87759	FALSE	-0.279138	FALSE	-1.85884	FALSE
chr1	9449059	9449226	chr1:9449059-9449226	3.67268	-0.128275	FALSE	0.204146	FALSE	-1.94936	FALSE	-0.122831	FALSE	-0.744057	FALSE	-2.04354	FALSE
chr1	9469651	9469882	chr1:9469651-9469882	8.1423	-0.0171411	FALSE	0.501902	FALSE	-0.59422	FALSE	-1.62774	Down	-0.656924	FALSE	-2.09676	Down
chr1	9470085	9470240	chr1:9470085-9470240	21.0674	0.0808401	FALSE	-0.236827	FALSE	-1.62648	Down	-2.71201	Down	-0.482016	FALSE	-2.20766	Down
chr1	9470742	9470812	chr1:9470742-9470812	9.86669	-0.0550426	FALSE	0.349055	FALSE	-1.04321	FALSE	-0.177584	FALSE	-0.983511	FALSE	-2.3093	Down
chr1	9475371	9475674	chr1:9475371-9475674	4.09112	-0.056499	FALSE	-0.48936	FALSE	0.0674336	FALSE	1.33833	FALSE	-0.873783	FALSE	0.206588	FALSE
chr1	9520231	9520670	chr1:9520231-9520670	10.1405	-0.416154	FALSE	-0.804419	FALSE	-0.639749	FALSE	-1.14946	FALSE	0.863691	FALSE	0.284029	FALSE
chr1	9524522	9524677	chr1:9524522-9524677	8.07082	-0.96991	FALSE	-1.85694	FALSE	-0.458237	FALSE	-0.365123	FALSE	-0.0848506	FALSE	0.304273	FALSE
chr1	9535927	9536129	chr1:9535927-9536129	7.50154	0.69165	FALSE	-1.61306	FALSE	-2.49395	Down	-2.91984	Down	-0.561673	FALSE	-0.952636	FALSE
chr1	9541407	9541506	chr1:9541407-9541506	14.6501	-0.0673831	FALSE	-0.0578013	FALSE	0.716825	FALSE	-0.389341	FALSE	-0.11545	FALSE	-0.931774	FALSE
chr1	9545208	9545415	chr1:9545208-9545415	80.1233	-0.44763	FALSE	-0.0463608	FALSE	-0.240767	FALSE	-0.186573	FALSE	0.067185	FALSE	-0.134358	FALSE
chr1	9547994	9548074	chr1:9547994-9548074	16.0602	-0.21861	FALSE	0.0157551	FALSE	0.336521	FALSE	0.306779	FALSE	-0.165237	FALSE	-0.091438	FALSE
chr1	9559791	9559860	chr1:9559791-9559860	4.70934	0.134646	FALSE	0.638374	FALSE	2.47502	FALSE	1.50768	FALSE	0.573033	FALSE	-0.133629	FALSE
chr1	9566917	9567030	chr1:9566917-9567030	18.2451	1.01196	FALSE	0.0240929	FALSE	0.280906	FALSE	1.40471	Up	-0.45282	FALSE	-0.734553	FALSE
chr1	9621599	9621617	chr1:9621599-9621617	2.64084	0.796826	FALSE	0.551841	FALSE	0.903505	FALSE	-1.63947	FALSE	1.01427	FALSE	-0.921907	FALSE
chr1	9675578	9675647	chr1:9675578-9675647	2.98087	-1.12984	FALSE	0.650933	FALSE	-3.96323	Down	-3.47851	Down	-2.43383	FALSE	-1.28771	FALSE
chr1	9699960	9700525	chr1:9699960-9700525	17.6057	-0.636982	FALSE	0.488018	FALSE	-0.525024	FALSE	-0.524744	FALSE	0.222577	FALSE	0.065897	FALSE
chr1	9700782	9700825	chr1:9700782-9700825	11.2506	-0.450755	FALSE	-0.487617	FALSE	-0.606506	FALSE	-0.444931	FALSE	0.556358	FALSE	-0.382165	FALSE
chr1	9703242	9703268	chr1:9703242-9703268	7.28573	0.324185	FALSE	0.253692	FALSE	0.146509	FALSE	-0.336454	FALSE	0.411423	FALSE	-0.665528	FALSE
chr1	9711802	9711882	chr1:9711802-9711882	4.7604	-0.168753	FALSE	0.00575674	FALSE	-0.445508	FALSE	-0.115171	FALSE	0.623227	FALSE	-0.311405	FALSE
chr1	9717084	9717136	chr1:9717084-9717136	2.77754	-0.217542	FALSE	-0.379101	FALSE	1.23485	FALSE	-1.31018	FALSE	0.89047	FALSE	-0.162723	FALSE
chr1	9740731	9740758	chr1:9740731-9740758	2.23084	1.6148	FALSE	0.503387	FALSE	-1.12236	FALSE	-0.305379	FALSE	0.947959	FALSE	-1.66518	FALSE
chr1	9748423	9748572	chr1:9748423-9748572	98.4997	-0.0687958	FALSE	0.111587	FALSE	-0.123382	FALSE	-0.152409	FALSE	0.00358724	FALSE	0.305802	FALSE
chr1	9755740	9755876	chr1:9755740-9755876	19.902	0.594457	FALSE	-0.686967	FALSE	1.70837	Up	2.60323	Up	0.00583575	FALSE	0.858694	FALSE
chr1	9756229	9756367	chr1:9756229-9756367	9.47644	0.447782	FALSE	0.541671	FALSE	1.41746	FALSE	1.9258	Up	-0.715121	FALSE	0.207793	FALSE
chr1	9762102	9762189	chr1:9762102-9762189	2.45486	-1.01589	FALSE	0.588562	FALSE	1.08848	FALSE	0.345061	FALSE	-0.36086	FALSE	-1.2392	FALSE
chr1	9767824	9767878	chr1:9767824-9767878	18.8061	-0.509571	FALSE	-0.513535	FALSE	0.867772	FALSE	2.13181	Up	0.539324	FALSE	0.919659	FALSE
chr1	9768463	9768553	chr1:9768463-9768553	20.5309	-0.152668	FALSE	-0.125264	FALSE	0.285877	FALSE	0.40475	FALSE	0.0549002	FALSE	0.550185	FALSE
chr1	9768814	9769084	chr1:9768814-9769084	42.0962	0.102459	FALSE	0.237661	FALSE	0.631369	FALSE	0.430749	FALSE	0.606628	FALSE	0.580163	FALSE
chr1	9772884	9772964	chr1:9772884-9772964	14.2667	-0.287672	FALSE	-0.0494568	FALSE	0.932906	FALSE	0.737781	FALSE	-0.633559	FALSE	0.405974	FALSE
chr1	9786496	9786502	chr1:9786496-9786502	4.41253	2.06815	FALSE	1.14375	FALSE	-0.185634	FALSE	0.0475527	FALSE	0.00241367	FALSE	0.20292	FALSE
chr1	9787718	9787739	chr1:9787718-9787739	4.88088	0.314446	FALSE	2.23618	FALSE	0.465725	FALSE	0.0332552	FALSE	-0.178471	FALSE	1.84108	FALSE
chr1	9789020	9789189	chr1:9789020-9789189	8.70266	0.95315	FALSE	0.276909	FALSE	0.567213	FALSE	1.16799	FALSE	0.442707	FALSE	0.198275	FALSE
chr1	9792477	9792625	chr1:9792477-9792625	10.2303	0.588804	FALSE	-0.182553	FALSE	0.491897	FALSE	0.429129	FALSE	-0.0160876	FALSE	0.209701	FALSE
chr1	9795411	9795423	chr1:9795411-9795423	2.57747	-1.57565	FALSE	1.56604	FALSE	-0.277947	FALSE	0.258791	FALSE	0.0250396	FALSE	-0.271879	FALSE
chr1	9795630	9795676	chr1:9795630-9795676	4.29846	-0.0928925	FALSE	0.559024	FALSE	0.902988	FALSE	-0.678669	FALSE	0.144903	FALSE	-0.156124	FALSE
chr1	9799097	9799264	chr1:9799097-9799264	40.2272	0.25122	FALSE	-0.0713976	FALSE	0.11165	FALSE	0.28043	FALSE	-0.123191	FALSE	0.177181	FALSE
chr1	9800033	9800115	chr1:9800033-9800115	11.3861	-0.222167	FALSE	1.18101	FALSE	1.20838	FALSE	0.0464192	FALSE	0.757516	FALSE	0.745201	FALSE
chr1	9801448	9801530	chr1:9801448-9801530	5.60772	-0.340486	FALSE	-0.31397	FALSE	-1.64872	FALSE	-0.739494	FALSE	-2.19507	FALSE	-1.77119	FALSE
chr1	9806093	9806096	chr1:9806093-9806096	3.29449	1.33194	FALSE	0.858984	FALSE	0.387673	FALSE	-0.236874	FALSE	0.913865	FALSE	-0.480188	FALSE
chr1	9816384	9816535	chr1:9816384-9816535	5.64916	-0.167818	FALSE	-1.62879	FALSE	0.928545	FALSE	2.22314	Up	-1.41964	FALSE	-1.36945	FALSE
chr1	9817289	9817705	chr1:9817289-9817705	4.61909	0.723209	FALSE	-0.727987	FALSE	0.11038	FALSE	0.5425	FALSE	-0.0475043	FALSE	0.585101	FALSE
chr1	9825196	9825364	chr1:9825196-9825364	8.01632	0.0954368	FALSE	0.304091	FALSE	0.473073	FALSE	2.98431	Up	-0.794089	FALSE	-0.592945	FALSE
chr1	9825723	9826019	chr1:9825723-9826019	12.3023	0.0767128	FALSE	0.665444	FALSE	0.773392	FALSE	1.54229	Up	0.168742	FALSE	0.0420094	FALSE
chr1	9830564	9830736	chr1:9830564-9830736	4.82946	-2.4614	FALSE	-0.7256	FALSE	1.48615	FALSE	1.53378	FALSE	0.665223	FALSE	0.39005	FALSE
chr1	9830986	9831145	chr1:9830986-9831145	3.58505	0.732408	FALSE	-0.172043	FALSE	0.416868	FALSE	-1.44042	FALSE	0.389706	FALSE	-0.0620592	FALSE
chr1	9842243	9842382	chr1:9842243-9842382	5.36388	-0.29331	FALSE	-0.0831775	FALSE	0.50588	FALSE	2.2403	FALSE	0.115908	FALSE	0.0766782	FALSE
chr1	9848292	9848570	chr1:9848292-9848570	15.0033	0.113447	FALSE	-0.592687	FALSE	-0.320502	FALSE	-0.761809	FALSE	-0.369582	FALSE	-0.10505	FALSE
chr1	9853222	9853231	chr1:9853222-9853231	4.08269	0.0449879	FALSE	0.109686	FALSE	0.357431	FALSE	2.33397	FALSE	-0.835592	FALSE	-0.794724	FALSE
chr1	9865509	9865596	chr1:9865509-9865596	12.3815	-0.169301	FALSE	0.180083	FALSE	-1.09946	FALSE	-0.0797179	FALSE	-0.376614	FALSE	-0.818356	FALSE
chr1	9875261	9875544	chr1:9875261-9875544	15.1171	-0.30604	FALSE	0.486879	FALSE	1.78071	Up	2.49667	Up	0.499956	FALSE	1.60134	Up
chr1	9883569	9883785	chr1:9883569-9883785	6.03089	-0.032212	FALSE	-0.150451	FALSE	0.393879	FALSE	0.182275	FALSE	0.975083	FALSE	0.291921	FALSE
chr1	9884403	9884516	chr1:9884403-9884516	7.32946	-0.154817	FALSE	-0.214227	FALSE	-0.301592	FALSE	0.31003	FALSE	-0.114396	FALSE	0.414258	FALSE
chr1	9887176	9887573	chr1:9887176-9887573	25.4545	-0.461896	FALSE	-0.517759	FALSE	0.101035	FALSE	-0.393142	FALSE	0.152048	FALSE	0.193573	FALSE
chr1	9888324	9888475	chr1:9888324-9888475	6.13201	-0.691979	FALSE	-1.38825	FALSE	0.24912	FALSE	0.697591	FALSE	0.44409	FALSE	0.416841	FALSE
chr1	9897539	9897704	chr1:9897539-9897704	8.88922	-0.365992	FALSE	0.171731	FALSE	-0.227673	FALSE	0.506008	FALSE	-0.597134	FALSE	-1.12995	FALSE
chr1	9908530	9908604	chr1:9908530-9908604	6.21309	-0.0173154	FALSE	0.0870878	FALSE	-2.13893	FALSE	-2.1869	Down	-0.871386	FALSE	-0.91202	FALSE
chr1	9909254	9909402	chr1:9909254-9909402	7.20275	-0.963408	FALSE	-2.22079	FALSE	-2.27766	Down	-3.30454	Down	-2.50568	Down	-3.88272	Down
chr1	9920107	9920242	chr1:9920107-9920242	5.6892	-0.455319	FALSE	-0.869499	FALSE	-1.12176	FALSE	0.538479	FALSE	-0.384172	FALSE	-0.736043	FALSE
chr1	9924340	9924347	chr1:9924340-9924347	1.94735	-0.297576	FALSE	0.322418	FALSE	1.38866	FALSE	2.07933	FALSE	1.54444	FALSE	0	FALSE
chr1	9925236	9925338	chr1:9925236-9925338	4.09614	-2.72657	FALSE	-1.04663	FALSE	0.694638	FALSE	1.52169	FALSE	1.50517	FALSE	1.55202	FALSE
chr1	9944113	9944231	chr1:9944113-9944231	44.6111	0.0144751	FALSE	0.492178	FALSE	0.189801	FALSE	-0.112475	FALSE	-0.236044	FALSE	0.258255	FALSE
chr1	9944746	9944747	chr1:9944746-9944747	9.34501	0.0893135	FALSE	0.442838	FALSE	0.796161	FALSE	0.962111	FALSE	1.02963	FALSE	-0.741748	FALSE
chr1	9947403	9947411	chr1:9947403-9947411	7.67677	-0.216239	FALSE	-0.513753	FALSE	0.8726	FALSE	0.473219	FALSE	0.306161	FALSE	0.296851	FALSE
chr1	9947650	9947892	chr1:9947650-9947892	28.8745	0.0816046	FALSE	0.368991	FALSE	0.872896	FALSE	1.18992	Up	0.576804	FALSE	1.0435	Up
chr1	9949194	9949345	chr1:9949194-9949345	14.536	-1.03016	FALSE	0.496651	FALSE	1.42535	Up	1.43507	Up	1.09509	FALSE	1.63717	Up
chr1	9951526	9951597	chr1:9951526-9951597	19.9556	0.323451	FALSE	-0.283532	FALSE	-0.346618	FALSE	-0.620573	FALSE	-0.107689	FALSE	-0.550463	FALSE
chr1	9955091	9955113	chr1:9955091-9955113	4.61081	-0.741613	FALSE	-1.28865	FALSE	-3.33287	FALSE	-3.23924	Down	-1.47939	FALSE	-2.94967	Down
chr1	9967856	9968271	chr1:9967856-9968271	10.6761	-0.245546	FALSE	-0.68527	FALSE	-0.267624	FALSE	-0.619158	FALSE	0.478612	FALSE	0.147678	FALSE
chr1	9969532	9969606	chr1:9969532-9969606	1.78804	-0.139406	FALSE	-0.82246	FALSE	1.54414	FALSE	0.632747	FALSE	0.842137	FALSE	-0.171382	FALSE
chr1	9983169	9983181	chr1:9983169-9983181	4.18597	0.582978	FALSE	0.119803	FALSE	0.970549	FALSE	0.804184	FALSE	2.11014	FALSE	0.55999	FALSE
chr1	9987612	9987664	chr1:9987612-9987664	2.67968	1.21922	FALSE	2.52401	FALSE	1.65376	FALSE	0.27376	FALSE	-1.0585	FALSE	1.80031	FALSE
chr1	9990109	9990228	chr1:9990109-9990228	11.6202	0.534772	FALSE	-0.241288	FALSE	-0.0472967	FALSE	0.0498543	FALSE	-0.331755	FALSE	-0.237847	FALSE
chr1	9995749	9995811	chr1:9995749-9995811	3.24783	1.07268	FALSE	-0.260132	FALSE	1.61179	FALSE	0.687541	FALSE	-0.949431	FALSE	-0.540261	FALSE
chr1	10008938	10009252	chr1:10008938-10009252	8.88768	3.68356	FALSE	-0.410901	FALSE	0.192446	FALSE	-0.347115	FALSE	-0.460986	FALSE	0.729712	FALSE
chr1	10012287	10012353	chr1:10012287-10012353	7.30545	0.403121	FALSE	0.195524	FALSE	1.31118	FALSE	-0.0289441	FALSE	-0.192986	FALSE	-0.352315	FALSE
chr1	10016600	10016615	chr1:10016600-10016615	3.239	1.0631	FALSE	2.44167	FALSE	2.68028	FALSE	0.617596	FALSE	0.282489	FALSE	-1.82041	FALSE
chr1	10022130	10022214	chr1:10022130-10022214	4.35847	1.04698	FALSE	-0.373324	FALSE	-1.06373	FALSE	0.73077	FALSE	-1.77923	FALSE	1.45849	FALSE
chr1	10031779	10031910	chr1:10031779-10031910	3.06698	-1.43357	FALSE	-0.772132	FALSE	-2.27628	FALSE	-3.73332	Down	-1.10699	FALSE	-3.91173	Down
chr1	10037896	10037942	chr1:10037896-10037942	20.1423	0.0338293	FALSE	0.190147	FALSE	-0.0556585	FALSE	-0.680045	FALSE	-0.192065	FALSE	-0.0223542	FALSE
chr1	10038154	10038216	chr1:10038154-10038216	21.392	-0.0117463	FALSE	0.100958	FALSE	0.34742	FALSE	-0.24585	FALSE	-0.224017	FALSE	-0.223133	FALSE
chr1	10039598	10040144	chr1:10039598-10040144	26.9102	-0.533288	FALSE	-0.0362855	FALSE	0.111486	FALSE	0.064764	FALSE	-0.158085	FALSE	0.142679	FALSE
chr1	10040769	10040855	chr1:10040769-10040855	12.0118	-1.07243	FALSE	-1.12737	FALSE	-0.0830398	FALSE	0.821068	FALSE	-0.392377	FALSE	1.52546	Up
chr1	10049512	10049634	chr1:10049512-10049634	16.0676	-0.985209	FALSE	-0.906773	FALSE	-0.450489	FALSE	-0.631618	FALSE	0.0921675	FALSE	0.172013	FALSE
chr1	10089668	10089745	chr1:10089668-10089745	5.96543	-0.257008	FALSE	-0.470759	FALSE	0.766327	FALSE	0.0977758	FALSE	-0.0618603	FALSE	-0.56707	FALSE
chr1	10096519	10096633	chr1:10096519-10096633	3.54624	-0.771519	FALSE	0.0723637	FALSE	0.745874	FALSE	1.26918	FALSE	-0.28194	FALSE	0.488854	FALSE
chr1	10107309	10107317	chr1:10107309-10107317	2.92875	-0.717049	FALSE	0.235161	FALSE	3.3731	FALSE	1.43406	FALSE	-1.43556	FALSE	0.689005	FALSE
chr1	10109241	10109315	chr1:10109241-10109315	8.78502	-0.698818	FALSE	-0.759959	FALSE	0.582665	FALSE	2.96566	Up	-0.387956	FALSE	1.12096	FALSE
chr1	10147792	10148069	chr1:10147792-10148069	10.569	-1.0616	FALSE	-0.28378	FALSE	1.60564	FALSE	0.665542	FALSE	1.72406	FALSE	-0.929713	FALSE
chr1	10150709	10150806	chr1:10150709-10150806	4.40612	0.257384	FALSE	0.219935	FALSE	-0.415113	FALSE	0.241627	FALSE	-0.138685	FALSE	0.915317	FALSE
chr1	10162682	10162767	chr1:10162682-10162767	5.5078	-1.23412	FALSE	-3.00208	FALSE	-1.52186	FALSE	-0.314529	FALSE	-0.658903	FALSE	-0.491466	FALSE
chr1	10169166	10169235	chr1:10169166-10169235	20.0656	0.168168	FALSE	0.636408	FALSE	0.572582	FALSE	-0.582012	FALSE	0.861082	FALSE	1.09177	FALSE
chr1	10170356	10170578	chr1:10170356-10170578	56.8354	-0.557581	FALSE	-0.464663	FALSE	-0.141269	FALSE	-0.146591	FALSE	-0.168275	FALSE	-0.140333	FALSE
chr1	10171171	10171296	chr1:10171171-10171296	16.8427	-0.406039	FALSE	-0.161749	FALSE	-0.336864	FALSE	-0.732761	FALSE	-1.82677	Down	-1.07819	FALSE
chr1	10177781	10178085	chr1:10177781-10178085	6.33029	-0.266121	FALSE	-0.0497148	FALSE	0.159899	FALSE	-0.752434	FALSE	-0.152578	FALSE	0.3119	FALSE
chr1	10207082	10207170	chr1:10207082-10207170	3.23731	0.271059	FALSE	0.0241795	FALSE	2.24399	FALSE	1.15393	FALSE	2.33879	FALSE	0.241515	FALSE
chr1	10212281	10212360	chr1:10212281-10212360	2.88711	-0.560156	FALSE	1.71388	FALSE	1.01783	FALSE	2.47672	FALSE	-0.177744	FALSE	0.273337	FALSE
chr1	10227020	10227135	chr1:10227020-10227135	38.3604	-0.153516	FALSE	-0.170354	FALSE	-0.257601	FALSE	-0.226877	FALSE	-0.625483	FALSE	-0.067583	FALSE
chr1	10233005	10233405	chr1:10233005-10233405	11.8832	-1.00503	FALSE	-0.00515348	FALSE	-0.560028	FALSE	-0.325928	FALSE	-0.128025	FALSE	-0.493892	FALSE
chr1	10247288	10247294	chr1:10247288-10247294	2.81341	-2.34403	FALSE	-0.603847	FALSE	-0.865572	FALSE	0.789645	FALSE	0.357993	FALSE	1.09925	FALSE
chr1	10257380	10257414	chr1:10257380-10257414	2.00222	0.792477	FALSE	0.454574	FALSE	0.9777	FALSE	-1.50284	FALSE	-0.102387	FALSE	2.02702	FALSE
chr1	10259634	10259851	chr1:10259634-10259851	29.9048	1.01436	FALSE	-0.427716	FALSE	0.14562	FALSE	0.34039	FALSE	0.147635	FALSE	0.960312	FALSE
chr1	10284703	10284873	chr1:10284703-10284873	14.1249	-0.302922	FALSE	-0.670108	FALSE	-1.03906	FALSE	-1.69192	Down	-0.634632	FALSE	-1.30474	FALSE
chr1	10285572	10285731	chr1:10285572-10285731	82.3862	-0.120237	FALSE	0.14515	FALSE	-0.104172	FALSE	-0.181668	FALSE	-0.217049	FALSE	0.233517	FALSE
chr1	10286222	10286291	chr1:10286222-10286291	19.5681	0.329451	FALSE	0.0345851	FALSE	-0.488315	FALSE	-1.00469	Down	0.124346	FALSE	0.622666	FALSE
chr1	10289652	10289677	chr1:10289652-10289677	6.44407	-0.169564	FALSE	-3.05407	FALSE	-2.15444	FALSE	-2.86513	Down	-1.18949	FALSE	-3.36132	Down
chr1	10291046	10291075	chr1:10291046-10291075	5.77761	-4.43964	FALSE	-1.81497	FALSE	-2.18239	FALSE	-4.02671	Down	-0.18733	FALSE	1.04715	FALSE
chr1	10291938	10292040	chr1:10291938-10292040	6.27344	-1.03718	FALSE	-2.69334	FALSE	-2.04062	FALSE	-1.31249	FALSE	0.237167	FALSE	0.213058	FALSE
chr1	10294811	10294958	chr1:10294811-10294958	10.3439	-0.263677	FALSE	-1.13194	FALSE	-0.406468	FALSE	-0.664692	FALSE	-1.37995	FALSE	0.169154	FALSE
chr1	10300669	10300677	chr1:10300669-10300677	1.76678	-0.180879	FALSE	-1.94589	FALSE	0.318507	FALSE	-1.79944	FALSE	0.340185	FALSE	0.555063	FALSE
chr1	10361314	10361371	chr1:10361314-10361371	2.25987	2.68158	FALSE	-1.19704	FALSE	2.63437	FALSE	-0.804572	FALSE	0.452538	FALSE	3.18089	FALSE
chr1	10395721	10395761	chr1:10395721-10395761	4.14072	-1.02705	FALSE	1.14942	FALSE	-0.0998011	FALSE	0.143358	FALSE	-0.06659	FALSE	-2.63371	Down
chr1	10484878	10484880	chr1:10484878-10484880	1.86607	-0.131139	FALSE	-1.38414	FALSE	1.47292	FALSE	1.77215	FALSE	0.795971	FALSE	0.399723	FALSE
chr1	10488356	10488402	chr1:10488356-10488402	3.2211	1.61775	FALSE	0.492349	FALSE	0.851909	FALSE	1.06925	FALSE	-0.924979	FALSE	-1.40104	FALSE
chr1	10513444	10513479	chr1:10513444-10513479	1.68912	-0.97464	FALSE	-1.59316	FALSE	2.41215	FALSE	-0.831666	FALSE	0.439494	FALSE	1.39075	FALSE
chr1	10650821	10650985	chr1:10650821-10650985	2.01723	-0.154697	FALSE	-2.98012	FALSE	-2.38021	FALSE	-3.82705	Down	-4.99008	FALSE	-2.60012	FALSE
chr1	10798061	10798260	chr1:10798061-10798260	7.1976	-0.652909	FALSE	-2.09748	FALSE	-1.19491	FALSE	0.689858	FALSE	-2.08803	Down	-0.427669	FALSE
chr1	10815127	10815183	chr1:10815127-10815183	3.25388	-0.286668	FALSE	0.766864	FALSE	-1.02665	FALSE	-3.43075	Down	-1.3351	FALSE	-1.5879	FALSE
chr1	10816258	10816322	chr1:10816258-10816322	5.19571	-0.176648	FALSE	-1.23567	FALSE	-0.362027	FALSE	-1.22149	FALSE	-0.344755	FALSE	0.43202	FALSE
chr1	10816540	10816633	chr1:10816540-10816633	3.7151	-1.65506	FALSE	-0.236619	FALSE	-3.55025	Down	-1.77865	FALSE	-2.04562	FALSE	0.142868	FALSE
chr1	10822383	10822422	chr1:10822383-10822422	8.95441	-0.771442	FALSE	-0.293735	FALSE	-1.56486	FALSE	-0.985073	FALSE	-0.534042	FALSE	-0.256412	FALSE
chr1	10857436	10857489	chr1:10857436-10857489	2.60754	0	FALSE	-0.561256	FALSE	-2.69597	FALSE	-5.46025	Down	-1.23398	FALSE	-0.88881	FALSE
chr1	10874429	10874442	chr1:10874429-10874442	4.24996	-0.884486	FALSE	-0.0131838	FALSE	-1.22646	FALSE	-4.05152	Down	-4.1816	Down	-1.37858	FALSE
chr1	10878187	10878549	chr1:10878187-10878549	14.5484	-3.99975	FALSE	-0.953259	FALSE	-5.08955	Down	-3.20116	Down	-1.90917	Down	-1.03692	FALSE
chr1	10880052	10880173	chr1:10880052-10880173	11.3692	-0.70417	FALSE	-1.16584	FALSE	-1.71247	FALSE	-1.57069	Down	-0.764182	FALSE	-0.662953	FALSE
chr1	10902823	10903024	chr1:10902823-10903024	11.3284	-0.387499	FALSE	-0.835906	FALSE	-0.81653	FALSE	0.860984	FALSE	-0.509306	FALSE	-0.569155	FALSE
chr1	10932534	10932668	chr1:10932534-10932668	7.53325	-2.31196	FALSE	-3.82009	FALSE	-1.08617	FALSE	-1.71958	FALSE	-1.18722	FALSE	0.925246	FALSE
chr1	11082303	11082336	chr1:11082303-11082336	3.23355	-0.172	FALSE	-1.83775	FALSE	-5.19061	Down	-6.04178	Down	-2.12112	FALSE	-5.12207	Down
chr1	11088078	11088116	chr1:11088078-11088116	3.15431	-2.38114	FALSE	-0.132017	FALSE	0.460596	FALSE	-1.07086	FALSE	-1.28021	FALSE	-0.517009	FALSE
chr1	11096803	11096912	chr1:11096803-11096912	5.14596	-1.10302	FALSE	0	FALSE	-4.03851	Down	-4.8194	Down	-5.06077	Down	-5.50505	Down
chr1	11097444	11097502	chr1:11097444-11097502	5.43192	-0.966103	FALSE	-1.76882	FALSE	-1.39638	FALSE	-1.91031	FALSE	-1.78407	FALSE	-3.4217	Down
chr1	11147652	11147772	chr1:11147652-11147772	3.50087	0.0441352	FALSE	-4.07183	FALSE	-2.47356	FALSE	-0.987162	FALSE	0.0989465	FALSE	-1.73817	FALSE
chr1	11214356	11214428	chr1:11214356-11214428	3.09558	-1.29628	FALSE	1.33286	FALSE	-1.13743	FALSE	0.195717	FALSE	-0.566931	FALSE	-0.56558	FALSE
chr1	11255578	11255647	chr1:11255578-11255647	2.79019	-0.0848346	FALSE	1.09416	FALSE	-2.9817	FALSE	-2.89862	Down	-2.84182	FALSE	-0.225072	FALSE
chr1	11257700	11257702	chr1:11257700-11257702	3.46657	-3.12532	FALSE	-0.44889	FALSE	-2.12639	FALSE	0.275798	FALSE	-0.0606368	FALSE	0.0610228	FALSE
chr1	11266515	11266625	chr1:11266515-11266625	5.76535	1.55906	FALSE	-1.56726	FALSE	-3.23554	Down	-1.14187	FALSE	-0.316557	FALSE	0.210327	FALSE
chr1	11277269	11277358	chr1:11277269-11277358	10.6951	-0.190694	FALSE	0.0601727	FALSE	-3.20196	Down	-4.56395	Down	-0.760342	FALSE	-0.346419	FALSE
chr1	11278001	11278097	chr1:11278001-11278097	35.5958	-2.16858	FALSE	-4.45644	Down	-4.33544	Down	-5.03412	Down	-1.56611	Down	-1.14627	Down
chr1	11293841	11293847	chr1:11293841-11293847	3.39893	0.776099	FALSE	0.357708	FALSE	-0.747729	FALSE	-1.68873	FALSE	-1.2738	FALSE	0.423479	FALSE
chr1	11295947	11295996	chr1:11295947-11295996	2.49528	0	FALSE	2.08387	FALSE	-0.683615	FALSE	-4.79697	Down	0.155125	FALSE	-1.19177	FALSE
chr1	11304780	11304920	chr1:11304780-11304920	33.0474	-0.403043	FALSE	0.896166	FALSE	-0.441335	FALSE	-0.373924	FALSE	-0.152369	FALSE	-0.0459408	FALSE
chr1	11324536	11324538	chr1:11324536-11324538	3.41448	-1.11012	FALSE	-0.898499	FALSE	-2.64699	FALSE	-3.13072	Down	0.570773	FALSE	-0.857743	FALSE
chr1	11329608	11329734	chr1:11329608-11329734	10.5869	-0.453266	FALSE	-1.07844	FALSE	-1.86214	Down	-2.28381	Down	-0.0445227	FALSE	-0.298276	FALSE
chr1	11330429	11330504	chr1:11330429-11330504	53.4469	-0.210903	FALSE	-0.431805	FALSE	-0.934176	Down	-0.841028	Down	-0.0974938	FALSE	0.015567	FALSE
chr1	11330731	11330810	chr1:11330731-11330810	12.0533	0.537422	FALSE	-0.583066	FALSE	-0.855959	FALSE	-1.0122	FALSE	-0.298977	FALSE	-0.399805	FALSE
chr1	11336805	11336891	chr1:11336805-11336891	3.48354	-0.352914	FALSE	-0.284313	FALSE	1.39668	FALSE	-1.19263	FALSE	-0.0715223	FALSE	0.334121	FALSE
chr1	11395563	11395646	chr1:11395563-11395646	3.71584	1.37741	FALSE	-2.0988	FALSE	-1.68088	FALSE	-3.40089	Down	-0.26805	FALSE	-3.68725	Down
chr1	11396116	11396223	chr1:11396116-11396223	7.07584	-3.23127	FALSE	-2.08384	FALSE	-4.60101	Down	-6.10258	Down	-4.23853	Down	-6.57159	Down
chr1	11401279	11401428	chr1:11401279-11401428	5.02048	-0.032302	FALSE	-0.942483	FALSE	-1.25056	FALSE	-3.37597	Down	-1.45825	FALSE	-3.36968	Down
chr1	11413972	11414264	chr1:11413972-11414264	15.4233	-0.410394	FALSE	-0.853504	FALSE	-1.41579	Down	-1.48243	Down	-1.01281	FALSE	-0.599677	FALSE
chr1	11427605	11427656	chr1:11427605-11427656	3.03248	-1.8654	FALSE	0.692509	FALSE	-0.977671	FALSE	-1.66815	FALSE	-2.14905	FALSE	-3.43142	Down
chr1	11451909	11451932	chr1:11451909-11451932	2.49497	3.00953	FALSE	-0.478909	FALSE	-1.98426	FALSE	0.317118	FALSE	0.39558	FALSE	0.547096	FALSE
chr1	11457765	11457856	chr1:11457765-11457856	5.24163	1.21178	FALSE	0.180716	FALSE	-3.2055	Down	-2.07636	Down	-0.772818	FALSE	-1.07099	FALSE
chr1	11461908	11461972	chr1:11461908-11461972	4.82156	-0.243324	FALSE	2.69272	FALSE	-3.32175	Down	-3.88445	Down	-2.72124	FALSE	-3.76599	Down
chr1	11462239	11462282	chr1:11462239-11462282	6.58576	-2.02412	FALSE	-0.255069	FALSE	-2.87443	Down	-2.84909	Down	-1.05541	FALSE	-1.69616	FALSE
chr1	11462613	11462643	chr1:11462613-11462643	9.25045	-0.654965	FALSE	0.283615	FALSE	-1.27333	FALSE	-2.66786	Down	-1.32482	FALSE	-1.59629	FALSE
chr1	11465127	11465202	chr1:11465127-11465202	12.5493	-0.0980192	FALSE	1.30004	FALSE	0.484477	FALSE	0.0282113	FALSE	-1.51713	FALSE	-0.406974	FALSE
chr1	11467281	11467370	chr1:11467281-11467370	87.5961	0.0014583	FALSE	0.119019	FALSE	-0.0729786	FALSE	-0.26527	FALSE	0.0703774	FALSE	0.0456271	FALSE
chr1	11473254	11473312	chr1:11473254-11473312	3.93375	1.78156	FALSE	-3.45941	FALSE	-0.0913122	FALSE	-6.29645	Down	0.149905	FALSE	0.405558	FALSE
chr1	11492619	11492823	chr1:11492619-11492823	10.5071	-0.0842045	FALSE	-0.617494	FALSE	0.843718	FALSE	1.62568	Up	0.101522	FALSE	1.32864	FALSE
chr1	11493115	11493361	chr1:11493115-11493361	46.3324	0.0366452	FALSE	0.110008	FALSE	0.118601	FALSE	-0.705641	FALSE	-0.858527	FALSE	0.158431	FALSE
chr1	11499638	11499849	chr1:11499638-11499849	18.4615	-0.0314334	FALSE	-0.1318	FALSE	0.207877	FALSE	-0.316594	FALSE	-0.228946	FALSE	0.328947	FALSE
chr1	11501649	11501936	chr1:11501649-11501936	35.9587	-1.10877	FALSE	-0.532301	FALSE	-0.23323	FALSE	-0.872072	Down	-0.779699	FALSE	-0.314125	FALSE
chr1	11521722	11521785	chr1:11521722-11521785	3.80076	1.94903	FALSE	0.70589	FALSE	-1.85928	FALSE	-2.2595	Down	-0.379204	FALSE	-0.33695	FALSE
chr1	11606350	11606360	chr1:11606350-11606360	2.81136	1.7048	FALSE	-0.208007	FALSE	0.298501	FALSE	-0.690248	FALSE	0.572692	FALSE	1.15758	FALSE
chr1	11619768	11619807	chr1:11619768-11619807	6.84611	-0.868808	FALSE	-4.54927	FALSE	-1.45126	FALSE	-1.39818	FALSE	-0.412654	FALSE	-0.76296	FALSE
chr1	11631800	11631805	chr1:11631800-11631805	3.27721	-3.25646	FALSE	0.427653	FALSE	-0.295365	FALSE	-1.72288	FALSE	0.199485	FALSE	-1.72343	FALSE
chr1	11645225	11645338	chr1:11645225-11645338	7.32014	0.82754	FALSE	-0.417912	FALSE	0.421104	FALSE	0.234173	FALSE	0.966406	FALSE	0.0352555	FALSE
chr1	11647285	11647444	chr1:11647285-11647444	5.7025	-0.106954	FALSE	0.0174474	FALSE	1.14975	FALSE	-0.725617	FALSE	-0.861803	FALSE	-0.194365	FALSE
chr1	11660370	11660381	chr1:11660370-11660381	4.0556	-2.36038	FALSE	-0.433539	FALSE	0.167029	FALSE	0.858388	FALSE	-0.382318	FALSE	0.472014	FALSE
chr1	11749644	11749768	chr1:11749644-11749768	2.43455	-0.127589	FALSE	0.665949	FALSE	-0.34618	FALSE	-1.22662	FALSE	-1.851	FALSE	-2.40592	FALSE
chr1	11763156	11763179	chr1:11763156-11763179	2.92988	3.62115	FALSE	-0.339121	FALSE	2.32088	FALSE	1.42865	FALSE	0.625081	FALSE	0.606266	FALSE
chr1	11846757	11846884	chr1:11846757-11846884	6.05944	-0.0136943	FALSE	0.639044	FALSE	1.29063	FALSE	-2.92987	FALSE	-0.986497	FALSE	0.3992	FALSE
chr1	11864479	11864576	chr1:11864479-11864576	4.15082	-3.98975	FALSE	-2.13939	FALSE	-1.24593	FALSE	-0.0648544	FALSE	-2.86557	Down	1.19101	FALSE
chr1	12060816	12060862	chr1:12060816-12060862	3.4227	-2.70045	FALSE	-2.12621	FALSE	0.175984	FALSE	-1.72633	FALSE	-1.07766	FALSE	-2.37338	FALSE
chr1	12126743	12126896	chr1:12126743-12126896	11.9152	1.68565	FALSE	1.02074	FALSE	-1.91811	Down	-1.18441	FALSE	-2.05533	FALSE	-2.93055	Down
chr1	12147906	12148104	chr1:12147906-12148104	5.76914	-0.339686	FALSE	-1.32832	FALSE	0.366538	FALSE	0.517466	FALSE	-0.674991	FALSE	-0.56773	FALSE
chr1	12204499	12204685	chr1:12204499-12204685	17.4625	0.204595	FALSE	0.425155	FALSE	0.909442	FALSE	1.00962	FALSE	-0.713877	FALSE	0.208276	FALSE
chr1	12344826	12344925	chr1:12344826-12344925	9.57505	-0.343032	FALSE	1.47167	FALSE	3.11779	Up	1.54412	FALSE	-0.586724	FALSE	0.734731	FALSE
chr1	12351327	12351453	chr1:12351327-12351453	35.9365	-0.153803	FALSE	-1.20145	FALSE	-0.359145	FALSE	0.5891	FALSE	-0.574274	FALSE	0.279157	FALSE
chr1	12354588	12354787	chr1:12354588-12354787	15.7953	-0.439047	FALSE	-1.00276	FALSE	-0.371501	FALSE	0.0490747	FALSE	-1.50254	Down	-0.459794	FALSE
chr1	12373070	12373210	chr1:12373070-12373210	10.0938	0.222518	FALSE	0.109083	FALSE	0.357532	FALSE	-0.443015	FALSE	-1.57117	FALSE	-0.98015	FALSE
chr1	12394878	12395096	chr1:12394878-12395096	3.42534	0.897354	FALSE	2.29203	FALSE	-1.38903	FALSE	-1.09985	FALSE	-1.459	FALSE	-0.76395	FALSE
chr1	12424647	12424798	chr1:12424647-12424798	23.8655	0.0816778	FALSE	-0.397268	FALSE	0.493531	FALSE	1.3729	Up	-0.737924	FALSE	0.464647	FALSE
chr1	12433803	12433988	chr1:12433803-12433988	2.30423	0.821562	FALSE	-1.22747	FALSE	0.324167	FALSE	-0.633479	FALSE	-0.704954	FALSE	1.4346	FALSE
chr1	12436349	12436482	chr1:12436349-12436482	2.8428	-0.16329	FALSE	-1.53729	FALSE	1.0017	FALSE	0.90528	FALSE	-1.13106	FALSE	-1.23053	FALSE
chr1	12466356	12466481	chr1:12466356-12466481	14.8429	-0.125595	FALSE	0.154139	FALSE	0.955924	FALSE	1.58057	Up	-1.29703	FALSE	1.10089	FALSE
chr1	12472443	12472518	chr1:12472443-12472518	6.63379	-1.26884	FALSE	0.0765431	FALSE	1.11359	FALSE	0.762719	FALSE	-0.197588	FALSE	0.384397	FALSE
chr1	12572873	12572978	chr1:12572873-12572978	7.08938	-1.61444	FALSE	-0.979638	FALSE	1.71065	Up	0.817727	FALSE	-0.0423894	FALSE	1.40217	FALSE
chr1	12580487	12580530	chr1:12580487-12580530	3.46264	-1.83793	FALSE	0.0703499	FALSE	0.91583	FALSE	1.2066	FALSE	0.796803	FALSE	0.49394	FALSE
chr1	12587098	12587166	chr1:12587098-12587166	17.3332	0.320656	FALSE	0.44364	FALSE	1.26059	FALSE	1.13217	FALSE	-1.6296	FALSE	-2.61722	Down
chr1	12587403	12587411	chr1:12587403-12587411	2.6674	-0.978231	FALSE	1.86444	FALSE	-0.511844	FALSE	1.32859	FALSE	1.43954	FALSE	-0.500187	FALSE
chr1	12587649	12587993	chr1:12587649-12587993	4.21639	0.712442	FALSE	0.559766	FALSE	1.96103	Up	1.44332	FALSE	-1.9081	FALSE	-1.41603	FALSE
chr1	12724654	12724864	chr1:12724654-12724864	3.18805	-3.9641	FALSE	-4.1013	FALSE	-1.02739	FALSE	1.32795	FALSE	-0.193876	FALSE	-0.308657	FALSE
chr1	12744802	12744972	chr1:12744802-12744972	2.17605	0.111216	FALSE	1.64539	FALSE	-0.312006	FALSE	-0.57259	FALSE	-1.63811	FALSE	-3.06375	Down
chr1	12776819	12777037	chr1:12776819-12777037	2.82072	-0.135421	FALSE	-1.00608	FALSE	1.48368	FALSE	2.22823	FALSE	0.347588	FALSE	0.689203	FALSE
chr1	12778880	12778950	chr1:12778880-12778950	3.02908	-1.19342	FALSE	-0.0788853	FALSE	1.29371	FALSE	0.584274	FALSE	2.53739	FALSE	0.293818	FALSE
chr1	12816889	12817176	chr1:12816889-12817176	6.72806	0.0216375	FALSE	-0.508118	FALSE	1.55297	FALSE	2.08815	Up	0.364074	FALSE	0.924171	FALSE
chr1	12821675	12821733	chr1:12821675-12821733	3.55678	-0.755775	FALSE	-0.893951	FALSE	-1.68936	FALSE	1.01692	FALSE	0.646086	FALSE	0.444162	FALSE
chr1	12831733	12831785	chr1:12831733-12831785	3.93485	-2.12883	FALSE	-0.111812	FALSE	0.374958	FALSE	2.24861	Up	1.09797	FALSE	0.811223	FALSE
chr1	12832210	12832449	chr1:12832210-12832449	6.40808	-1.00868	FALSE	-1.57687	FALSE	-0.304283	FALSE	1.65683	FALSE	0.0182626	FALSE	1.87546	FALSE
chr1	12858862	12858923	chr1:12858862-12858923	1.4936	0	FALSE	2.26314	FALSE	1.67256	FALSE	1.02705	FALSE	-0.108934	FALSE	1.33907	FALSE
chr1	12864222	12864231	chr1:12864222-12864231	5.92097	0.808192	FALSE	-0.636649	FALSE	-0.663361	FALSE	0.00941157	FALSE	-0.013977	FALSE	-1.1466	FALSE
chr1	12865484	12865632	chr1:12865484-12865632	13.4302	0.166209	FALSE	0.250565	FALSE	-0.700281	FALSE	0.142751	FALSE	-0.653542	FALSE	-0.538375	FALSE
chr1	12866125	12866192	chr1:12866125-12866192	3.34501	-0.373098	FALSE	-0.455412	FALSE	3.90433	Up	1.71705	FALSE	-0.346619	FALSE	0.277084	FALSE
chr1	12873904	12873920	chr1:12873904-12873920	4.3201	-3.12604	FALSE	-1.312	FALSE	-1.53611	FALSE	-2.29948	FALSE	-0.719086	FALSE	-2.50886	FALSE
chr1	12874431	12874578	chr1:12874431-12874578	18.377	-0.0381244	FALSE	-0.169777	FALSE	0.520277	FALSE	1.45312	Up	0.455348	FALSE	-0.370587	FALSE
chr1	12885989	12886062	chr1:12885989-12886062	4.21957	-0.727808	FALSE	-1.04424	FALSE	0.901756	FALSE	0.0264408	FALSE	-0.789618	FALSE	-2.5453	FALSE
chr1	12886626	12886773	chr1:12886626-12886773	8.48107	-1.17218	FALSE	-2.34191	FALSE	-1.48075	FALSE	-3.91988	Down	0.0637352	FALSE	-1.00768	FALSE
chr1	12893316	12893408	chr1:12893316-12893408	2.50156	-1.50169	FALSE	0.524026	FALSE	0.846998	FALSE	1.55341	FALSE	1.52573	FALSE	0.309778	FALSE
chr1	12930830	12930870	chr1:12930830-12930870	3.26374	-0.400019	FALSE	-0.106986	FALSE	-1.71341	FALSE	-0.899634	FALSE	1.52451	FALSE	-0.124415	FALSE
chr1	12954312	12954390	chr1:12954312-12954390	7.36642	-1.45999	FALSE	-1.93396	FALSE	-2.90168	Down	-4.0434	Down	-0.944522	FALSE	0.142344	FALSE
chr1	12990296	12990445	chr1:12990296-12990445	13.1762	-0.025348	FALSE	-0.465009	FALSE	0.222884	FALSE	-1.19991	FALSE	-0.305685	FALSE	-0.361495	FALSE
chr1	12991126	12991139	chr1:12991126-12991139	5.23717	-1.15216	FALSE	-2.08747	FALSE	-1.3261	FALSE	-2.97782	Down	-0.762505	FALSE	-1.92345	FALSE
chr1	12992438	12992867	chr1:12992438-12992867	12.5512	0.105307	FALSE	-0.331756	FALSE	-0.368465	FALSE	-0.575924	FALSE	-0.0833469	FALSE	-0.778289	FALSE
chr1	12995885	12995925	chr1:12995885-12995925	4.35007	-1.12619	FALSE	-1.12726	FALSE	-0.485826	FALSE	1.06832	FALSE	0.960034	FALSE	0.267655	FALSE
chr1	12998828	12998892	chr1:12998828-12998892	7.55135	0.762882	FALSE	0.670338	FALSE	1.42676	FALSE	-0.160539	FALSE	-0.015389	FALSE	1.35573	FALSE
chr1	13009397	13009635	chr1:13009397-13009635	3.84688	0.0898489	FALSE	0.127752	FALSE	-0.0530931	FALSE	-1.56776	FALSE	0.72605	FALSE	-2.13002	FALSE
chr1	13015671	13015993	chr1:13015671-13015993	5.26601	3.47985	FALSE	-0.683219	FALSE	-1.13519	FALSE	-2.39621	Down	-0.57459	FALSE	-1.43471	FALSE
chr1	13040854	13040864	chr1:13040854-13040864	2.48879	0.236898	FALSE	0.376325	FALSE	2.75984	FALSE	0.0860026	FALSE	-0.599028	FALSE	-0.857194	FALSE
chr1	13045347	13045427	chr1:13045347-13045427	9.17606	-0.241069	FALSE	-0.384323	FALSE	1.30285	FALSE	-0.247232	FALSE	-0.231349	FALSE	0.411637	FALSE
chr1	13052210	13052248	chr1:13052210-13052248	4.35786	0.571127	FALSE	0.0859261	FALSE	0.0865581	FALSE	-0.230611	FALSE	1.07849	FALSE	0.633256	FALSE
chr1	13058818	13058841	chr1:13058818-13058841	2.60139	-2.30526	FALSE	-0.779155	FALSE	-2.03505	FALSE	-4.85097	Down	-0.0327511	FALSE	-1.95989	FALSE
chr1	13059788	13059888	chr1:13059788-13059888	8.7765	-0.428816	FALSE	-1.98374	FALSE	-3.19538	Down	-3.4115	Down	-2.26501	Down	-2.49709	Down
chr1	13060143	13060213	chr1:13060143-13060213	5.74297	-0.0469832	FALSE	0.717838	FALSE	-3.13579	Down	-5.78185	Down	-1.49414	FALSE	-2.01136	Down
chr1	13064538	13064683	chr1:13064538-13064683	22.2454	1.61694	FALSE	0.0492368	FALSE	-1.45069	Down	-1.59995	Down	-0.544646	FALSE	-1.2247	Down
chr1	13065428	13065790	chr1:13065428-13065790	21.4309	0.0226219	FALSE	-0.0581852	FALSE	-0.541736	FALSE	0.142001	FALSE	-0.115005	FALSE	0.233747	FALSE
chr1	13069781	13069910	chr1:13069781-13069910	15.9298	-0.654215	FALSE	-1.07421	FALSE	-1.27317	FALSE	-1.9094	Down	0.291996	FALSE	-0.932367	FALSE
chr1	13071448	13071571	chr1:13071448-13071571	14.0461	0.913679	FALSE	-0.0558664	FALSE	-1.08004	FALSE	-1.40891	Down	0.319584	FALSE	-1.03467	FALSE
chr1	13073845	13074112	chr1:13073845-13074112	17.4091	0.481923	FALSE	0.757032	FALSE	-0.145208	FALSE	-1.47296	Down	-0.438673	FALSE	-0.116099	FALSE
chr1	13074693	13074936	chr1:13074693-13074936	15.3951	-0.48937	FALSE	0.079485	FALSE	-1.40615	Down	-2.10391	Down	-1.19482	FALSE	-1.18361	FALSE
chr1	13076445	13076510	chr1:13076445-13076510	11.3353	-0.423588	FALSE	1.18788	FALSE	-1.25791	Down	-0.902831	FALSE	-0.180664	FALSE	-0.2355	FALSE
chr1	13077288	13077403	chr1:13077288-13077403	15.6867	0.495372	FALSE	0.638007	FALSE	-0.0440356	FALSE	0.149654	FALSE	-0.132147	FALSE	0.126131	FALSE
chr1	13078415	13078416	chr1:13078415-13078416	9.63291	0.674654	FALSE	0.530092	FALSE	0.882438	FALSE	-0.239513	FALSE	-1.00482	FALSE	-0.899834	FALSE
chr1	13079702	13079705	chr1:13079702-13079705	8.13979	0.51802	FALSE	1.49709	FALSE	-0.15558	FALSE	-0.382575	FALSE	-0.773456	FALSE	-0.994303	FALSE
chr1	13082018	13082167	chr1:13082018-13082167	9.90117	0.615405	FALSE	0.765829	FALSE	-0.754253	FALSE	-1.10979	FALSE	0.131534	FALSE	-1.27178	FALSE
chr1	13085084	13085276	chr1:13085084-13085276	9.56952	-1.57374	FALSE	0.254145	FALSE	-1.66112	FALSE	-2.76653	Down	-2.09305	FALSE	-3.05578	Down
chr1	13088150	13088315	chr1:13088150-13088315	8.37021	0.373362	FALSE	0.254905	FALSE	-2.82588	Down	-4.92577	Down	-1.85963	FALSE	-3.9011	Down
chr1	13092535	13092704	chr1:13092535-13092704	9.29273	-2.49868	FALSE	-1.9906	FALSE	-1.83088	Down	-3.4084	Down	0.00724555	FALSE	-0.0131998	FALSE
chr1	13101550	13101641	chr1:13101550-13101641	4.65304	1.75927	FALSE	-0.36662	FALSE	-0.334613	FALSE	-1.02894	FALSE	0.448404	FALSE	0.0961648	FALSE
chr1	13104088	13104160	chr1:13104088-13104160	14.4761	0.228464	FALSE	0.959825	FALSE	-0.481	FALSE	-0.78574	FALSE	-0.407798	FALSE	-0.402239	FALSE
chr1	13108673	13108826	chr1:13108673-13108826	70.5573	-0.264194	FALSE	-0.00955454	FALSE	0.114714	FALSE	0.0175028	FALSE	-0.362045	FALSE	-0.392477	FALSE
chr1	13111758	13111804	chr1:13111758-13111804	5.0328	-1.77697	FALSE	-1.91817	FALSE	-2.48427	FALSE	-1.58589	FALSE	-0.722977	FALSE	-0.392795	FALSE
chr1	13117874	13117919	chr1:13117874-13117919	9.72094	-0.115088	FALSE	-0.342741	FALSE	0.695806	FALSE	-0.258376	FALSE	-0.476898	FALSE	0.114204	FALSE
chr1	13118452	13119022	chr1:13118452-13119022	7.22529	-0.423187	FALSE	0.975729	FALSE	0.326232	FALSE	-1.13767	FALSE	0.36936	FALSE	-1.10671	FALSE
chr1	13125655	13125799	chr1:13125655-13125799	11.4397	-1.0481	FALSE	-0.383294	FALSE	-1.17117	FALSE	-0.71909	FALSE	-0.804077	FALSE	-0.499588	FALSE
chr1	13127154	13127231	chr1:13127154-13127231	9.73805	1.67419	FALSE	1.24192	FALSE	-1.66223	FALSE	-1.77353	Down	-1.05898	FALSE	-2.74021	Down
chr1	13128114	13128317	chr1:13128114-13128317	9.1286	0.423615	FALSE	0.238357	FALSE	-2.28812	Down	-1.83416	Down	-0.276118	FALSE	-1.11472	FALSE
chr1	13132098	13132423	chr1:13132098-13132423	27.2549	-0.249997	FALSE	0.36393	FALSE	-0.63421	FALSE	-0.803148	FALSE	-0.443444	FALSE	-0.292496	FALSE
chr1	13133729	13133920	chr1:13133729-13133920	9.36566	0.291878	FALSE	0.776416	FALSE	-0.12402	FALSE	-0.00190956	FALSE	-1.59089	FALSE	-0.622608	FALSE
chr1	13146462	13146752	chr1:13146462-13146752	6.41951	-0.0118801	FALSE	-0.387476	FALSE	-1.13328	FALSE	-0.119651	FALSE	0.171221	FALSE	-3.34975	FALSE
chr1	13159275	13159441	chr1:13159275-13159441	2.5387	3.37396	FALSE	0.310324	FALSE	0.780578	FALSE	-1.02897	FALSE	1.96589	FALSE	1.16545	FALSE
chr1	13161718	13161768	chr1:13161718-13161768	2.28744	-1.10986	FALSE	0.416308	FALSE	-1.46645	FALSE	1.45068	FALSE	-0.816119	FALSE	2.22023	FALSE
chr1	13199738	13199825	chr1:13199738-13199825	7.17696	-0.0621081	FALSE	0.0986335	FALSE	0.205438	FALSE	2.15861	FALSE	0.457977	FALSE	0.078883	FALSE
chr1	13207459	13207500	chr1:13207459-13207500	5.66713	0.0231041	FALSE	-0.353271	FALSE	0.0014784	FALSE	0.0315969	FALSE	0.353012	FALSE	1.28478	FALSE
chr1	13223466	13223470	chr1:13223466-13223470	4.89282	0.743108	FALSE	0.128288	FALSE	-0.825568	FALSE	0.12494	FALSE	1.68964	FALSE	-0.0952642	FALSE
chr1	13225891	13226143	chr1:13225891-13226143	4.2537	1.63412	FALSE	-0.774829	FALSE	-0.244234	FALSE	0.237395	FALSE	1.38273	FALSE	-0.220751	FALSE
chr1	13228097	13228258	chr1:13228097-13228258	10.9157	-1.14033	FALSE	-0.0957677	FALSE	0.911114	FALSE	1.39587	FALSE	0.642104	FALSE	0.916223	FALSE
chr1	13228472	13228616	chr1:13228472-13228616	18.8742	-0.772977	FALSE	-0.553477	FALSE	0.775749	FALSE	0.806859	FALSE	0.823485	FALSE	1.80074	Up
chr1	13228877	13228882	chr1:13228877-13228882	7.29409	-0.902308	FALSE	-0.918255	FALSE	1.60872	FALSE	1.03346	FALSE	0.946044	FALSE	1.7152	Up
chr1	13231378	13231514	chr1:13231378-13231514	9.34747	1.15032	FALSE	0.598833	FALSE	1.31631	FALSE	1.07808	FALSE	0.32385	FALSE	0.425797	FALSE
chr1	13240102	13240139	chr1:13240102-13240139	4.93895	0.784156	FALSE	-0.106646	FALSE	-0.358592	FALSE	0.950099	FALSE	-0.129014	FALSE	1.56673	FALSE
chr1	13240503	13240582	chr1:13240503-13240582	3.77673	-0.886744	FALSE	-0.920798	FALSE	-0.330196	FALSE	1.06503	FALSE	-0.682128	FALSE	0.296963	FALSE
chr1	13245818	13245981	chr1:13245818-13245981	29.8738	-0.252796	FALSE	0.323982	FALSE	-0.20615	FALSE	-0.213568	FALSE	-0.664165	FALSE	-0.153198	FALSE
chr1	13256362	13256501	chr1:13256362-13256501	38.1769	-0.224019	FALSE	-0.167577	FALSE	-0.400206	FALSE	0.302067	FALSE	-0.500544	FALSE	-0.138002	FALSE
chr1	13259597	13259756	chr1:13259597-13259756	16.5004	0.564892	FALSE	0.254496	FALSE	0.680869	FALSE	0.639654	FALSE	0.195609	FALSE	0.376547	FALSE
chr1	13259980	13260168	chr1:13259980-13260168	19.0927	0.441609	FALSE	0.143671	FALSE	0.292655	FALSE	0.246716	FALSE	0.0122996	FALSE	0.330326	FALSE
chr1	13260538	13260698	chr1:13260538-13260698	6.66901	-1.19832	FALSE	-0.253848	FALSE	-0.234478	FALSE	1.96535	Up	-0.166334	FALSE	0.926893	FALSE
chr1	13281137	13281231	chr1:13281137-13281231	17.3996	0.702856	FALSE	0.125311	FALSE	2.47979	Up	2.58572	Up	-1.26406	FALSE	0.986863	FALSE
chr1	13283795	13283898	chr1:13283795-13283898	11.0223	0.322656	FALSE	0.361533	FALSE	2.00952	Up	2.24122	Up	-0.589839	FALSE	0.709626	FALSE
chr1	13291067	13291075	chr1:13291067-13291075	3.61674	-1.12372	FALSE	-0.820757	FALSE	0.55668	FALSE	2.2811	Up	1.26661	FALSE	0.871357	FALSE
chr1	13291374	13291464	chr1:13291374-13291464	7.41664	-1.82694	FALSE	-0.246895	FALSE	0.847151	FALSE	2.77285	Up	1.1294	FALSE	1.41558	FALSE
chr1	13302652	13302742	chr1:13302652-13302742	7.27197	-0.0361326	FALSE	0.095299	FALSE	0.459415	FALSE	0.861367	FALSE	-0.874314	FALSE	-0.908931	FALSE
chr1	13309034	13309204	chr1:13309034-13309204	6.75514	-3.09843	FALSE	-1.92904	FALSE	0.0900583	FALSE	0.940681	FALSE	0.32202	FALSE	1.02441	FALSE
chr1	13309667	13309684	chr1:13309667-13309684	2.58813	-1.12461	FALSE	-1.18625	FALSE	1.79285	FALSE	2.07722	FALSE	0.349502	FALSE	1.45823	FALSE
chr1	13336681	13336732	chr1:13336681-13336732	4.04995	-2.33812	FALSE	-1.89541	FALSE	-0.587212	FALSE	1.08005	FALSE	1.64067	FALSE	-0.037241	FALSE
chr1	13347515	13347536	chr1:13347515-13347536	2.07921	0	FALSE	-1.85746	FALSE	-0.6408	FALSE	1.39641	FALSE	0.765383	FALSE	0.166654	FALSE
chr1	13355878	13355889	chr1:13355878-13355889	4.59021	-0.526363	FALSE	-0.632121	FALSE	0.596187	FALSE	0.0443161	FALSE	-0.887212	FALSE	-0.592349	FALSE
chr1	13356299	13356436	chr1:13356299-13356436	7.46555	-4.07168	FALSE	-1.91528	FALSE	0.847118	FALSE	1.01848	FALSE	0.0237885	FALSE	0.495616	FALSE
chr1	13360782	13360905	chr1:13360782-13360905	18.4411	-0.711937	FALSE	-0.208465	FALSE	-0.688058	FALSE	0.56036	FALSE	0.433677	FALSE	-0.41312	FALSE
chr1	13372499	13372610	chr1:13372499-13372610	93.7195	-0.220792	FALSE	0.197896	FALSE	0.260208	FALSE	0.139373	FALSE	-0.0151968	FALSE	0.47183	FALSE
chr1	13374085	13374139	chr1:13374085-13374139	10.1819	-1.20279	FALSE	-1.57665	FALSE	0.306565	FALSE	-0.398555	FALSE	-1.01271	FALSE	0.00118263	FALSE
chr1	13390078	13390358	chr1:13390078-13390358	7.42697	-0.65153	FALSE	0.446099	FALSE	1.25927	FALSE	1.56071	FALSE	1.05816	FALSE	0.539762	FALSE
chr1	13405468	13405655	chr1:13405468-13405655	2.45849	1.33038	FALSE	-0.423853	FALSE	1.90585	FALSE	-0.50266	FALSE	0.366638	FALSE	-0.058392	FALSE
chr1	13427001	13427133	chr1:13427001-13427133	3.77116	1.69497	FALSE	0.971321	FALSE	-2.5865	FALSE	-1.52578	FALSE	0.446824	FALSE	0.57114	FALSE
chr1	13455665	13455854	chr1:13455665-13455854	5.59662	0	FALSE	0.988169	FALSE	-2.66582	Down	-4.05239	Down	-4.58306	Down	-3.15342	Down
chr1	13456931	13457215	chr1:13456931-13457215	22.4278	-1.02306	FALSE	-1.76133	Down	-1.6118	Down	-0.60339	FALSE	-0.271939	FALSE	0.431665	FALSE
chr1	13465333	13465618	chr1:13465333-13465618	9.72165	0.798803	FALSE	-1.63769	FALSE	-4.73849	Down	-3.02742	Down	-0.275329	FALSE	-0.528185	FALSE
chr1	13468320	13468486	chr1:13468320-13468486	7.36365	-0.142789	FALSE	-0.914085	FALSE	-2.06574	FALSE	-1.60527	FALSE	-0.0822265	FALSE	-0.91296	FALSE
chr1	13487918	13488078	chr1:13487918-13488078	9.50652	0.0378833	FALSE	1.14578	FALSE	0.730284	FALSE	0.433176	FALSE	-0.331942	FALSE	-1.63899	FALSE
chr1	13488352	13488399	chr1:13488352-13488399	6.23912	0.0677881	FALSE	1.03653	FALSE	2.06114	FALSE	1.21888	FALSE	-0.205249	FALSE	-1.01755	FALSE
chr1	13493843	13494104	chr1:13493843-13494104	4.90951	-1.12219	FALSE	-1.62137	FALSE	-0.59524	FALSE	1.89057	Up	0.610716	FALSE	1.22325	FALSE
chr1	13496546	13496718	chr1:13496546-13496718	3.67008	-2.34071	FALSE	-0.885224	FALSE	1.80726	FALSE	1.49232	FALSE	0.386584	FALSE	1.09352	FALSE
chr1	13502130	13502321	chr1:13502130-13502321	8.68673	-1.17501	FALSE	0.491174	FALSE	2.00649	Up	1.44519	Up	0.545094	FALSE	0.622819	FALSE
chr1	13506986	13507147	chr1:13506986-13507147	4.91287	-2.48541	FALSE	-3.69023	FALSE	-4.60887	Down	-4.49806	Down	-2.91174	Down	-4.87753	Down
chr1	13507724	13507754	chr1:13507724-13507754	1.87076	0	FALSE	-2.69921	FALSE	-2.77388	FALSE	-4.4115	FALSE	-2.58877	FALSE	-5.37061	FALSE
chr1	13514704	13514777	chr1:13514704-13514777	5.59814	1.51338	FALSE	0.909204	FALSE	-1.14003	FALSE	0.324393	FALSE	-0.583226	FALSE	-0.322989	FALSE
chr1	13518533	13518543	chr1:13518533-13518543	2.75921	0.793371	FALSE	0.124431	FALSE	-1.16216	FALSE	-2.52542	FALSE	-1.07666	FALSE	-3.59658	Down
chr1	13531677	13531758	chr1:13531677-13531758	5.88707	0.694231	FALSE	-1.85718	FALSE	-0.505833	FALSE	0.0430637	FALSE	-0.658561	FALSE	0.541678	FALSE
chr1	13535062	13535264	chr1:13535062-13535264	20.9395	0.816531	FALSE	0.27375	FALSE	-0.0576812	FALSE	-0.129776	FALSE	-0.516872	FALSE	-0.147196	FALSE
chr1	13546580	13546689	chr1:13546580-13546689	8.36375	0.000644083	FALSE	-0.363351	FALSE	0.285402	FALSE	0.0891364	FALSE	0.230407	FALSE	-0.189703	FALSE
chr1	13561751	13561757	chr1:13561751-13561757	3.18496	0.949611	FALSE	-0.271293	FALSE	-1.49057	FALSE	-0.680573	FALSE	0.806444	FALSE	1.6078	FALSE
chr1	13574267	13574405	chr1:13574267-13574405	4.58804	1.68818	FALSE	0.891723	FALSE	-3.56555	Down	-4.37854	Down	0.205938	FALSE	-0.781861	FALSE
chr1	13588346	13588430	chr1:13588346-13588430	4.69552	-1.12254	FALSE	-2.31767	FALSE	1.21542	FALSE	-0.765605	FALSE	-0.418599	FALSE	1.2825	FALSE
chr1	13589411	13589468	chr1:13589411-13589468	4.53812	-0.619732	FALSE	-1.04356	FALSE	-1.08603	FALSE	-0.894237	FALSE	1.17469	FALSE	0.615766	FALSE
chr1	13589806	13590110	chr1:13589806-13590110	9.18502	-0.693494	FALSE	-0.128487	FALSE	0.358521	FALSE	-0.338586	FALSE	-0.435713	FALSE	0.0550055	FALSE
chr1	13594419	13594423	chr1:13594419-13594423	3.11772	-0.112295	FALSE	-0.780504	FALSE	-0.202455	FALSE	0.720082	FALSE	0.689861	FALSE	0.238189	FALSE
chr1	13596854	13596954	chr1:13596854-13596954	6.71895	0.903971	FALSE	0.561524	FALSE	0.236966	FALSE	0.505799	FALSE	0.659155	FALSE	-0.970301	FALSE
chr1	13599145	13599217	chr1:13599145-13599217	7.67511	-0.107395	FALSE	-0.170818	FALSE	1.31103	FALSE	0.631978	FALSE	0.869409	FALSE	-1.16181	FALSE
chr1	13604566	13604827	chr1:13604566-13604827	7.01475	2.21109	FALSE	-0.47781	FALSE	0.140244	FALSE	-0.714497	FALSE	-0.127378	FALSE	-0.212767	FALSE
chr1	13605374	13605491	chr1:13605374-13605491	16.55	0.203088	FALSE	0.451047	FALSE	0.286882	FALSE	-1.94178	Down	0.633891	FALSE	-0.535	FALSE
chr1	13605925	13606080	chr1:13605925-13606080	11.0955	0.392255	FALSE	-0.369483	FALSE	-1.135	FALSE	-1.05932	FALSE	-0.450197	FALSE	0.855209	FALSE
chr1	13606739	13606855	chr1:13606739-13606855	26.1118	0.198824	FALSE	-0.0127603	FALSE	-0.693363	FALSE	-0.70295	FALSE	-1.20684	Down	-1.3269	Down
chr1	13608153	13608268	chr1:13608153-13608268	7.62927	0.725732	FALSE	-0.167794	FALSE	-0.422209	FALSE	0.839007	FALSE	0.15547	FALSE	-1.42344	FALSE
chr1	13621789	13621804	chr1:13621789-13621804	2.96952	0.015503	FALSE	0.123707	FALSE	-0.646716	FALSE	-0.356516	FALSE	0.903276	FALSE	-0.294186	FALSE
chr1	13626273	13626293	chr1:13626273-13626293	4.24924	1.9626	FALSE	0.434852	FALSE	0.0294974	FALSE	-2.25023	FALSE	0.513956	FALSE	0.325276	FALSE
chr1	13628244	13628284	chr1:13628244-13628284	4.48603	0.352625	FALSE	-1.12269	FALSE	0.7682	FALSE	-1.1602	FALSE	0.788747	FALSE	0.234513	FALSE
chr1	13632412	13632485	chr1:13632412-13632485	2.9873	-1.58751	FALSE	0.0419295	FALSE	-0.776113	FALSE	-0.398687	FALSE	0.113572	FALSE	0.33648	FALSE
chr1	13639705	13639707	chr1:13639705-13639707	2.80651	-2.66826	FALSE	-1.32449	FALSE	-1.06412	FALSE	-1.64118	FALSE	-3.87939	FALSE	2.11114	FALSE
chr1	13641212	13641296	chr1:13641212-13641296	13.5889	0.460853	FALSE	-0.0202838	FALSE	0.902571	FALSE	0.617978	FALSE	0.66569	FALSE	0.0323958	FALSE
chr1	13642904	13643018	chr1:13642904-13643018	9.57885	-2.20563	FALSE	-0.53134	FALSE	0.0244417	FALSE	-0.301736	FALSE	0.307326	FALSE	0.509227	FALSE
chr1	13643248	13643367	chr1:13643248-13643367	12.7827	-0.366303	FALSE	-0.602524	FALSE	0.204986	FALSE	-0.0907296	FALSE	-0.269768	FALSE	1.1029	FALSE
chr1	13645981	13646065	chr1:13645981-13646065	16.6932	-0.247179	FALSE	0.469289	FALSE	0.446616	FALSE	-0.811915	FALSE	0.0354772	FALSE	0.171448	FALSE
chr1	13660004	13660032	chr1:13660004-13660032	10.5533	0.559761	FALSE	-0.797245	FALSE	0.272182	FALSE	-0.204463	FALSE	-0.362345	FALSE	-0.290058	FALSE
chr1	13660634	13660733	chr1:13660634-13660733	83.391	-0.377605	FALSE	-0.283778	FALSE	-1.10244	Down	-1.16572	Down	-0.340422	FALSE	-0.0100918	FALSE
chr1	13663601	13663624	chr1:13663601-13663624	16.2536	-1.03017	FALSE	0.19525	FALSE	-1.24033	FALSE	-1.68446	Down	-0.0327826	FALSE	0.329954	FALSE
chr1	13664401	13664537	chr1:13664401-13664537	39.8846	0.581124	FALSE	-0.510826	FALSE	-0.463272	FALSE	-0.967385	Down	0.303737	FALSE	0.360569	FALSE
chr1	13679119	13679334	chr1:13679119-13679334	8.27176	-1.53336	FALSE	-0.504143	FALSE	-1.05651	FALSE	1.05195	FALSE	0.328487	FALSE	0.174392	FALSE
chr1	13698271	13698364	chr1:13698271-13698364	2.53895	-0.648403	FALSE	-0.174345	FALSE	0.997287	FALSE	-1.31916	FALSE	0.38571	FALSE	2.84511	FALSE
chr1	13854754	13854815	chr1:13854754-13854815	4.17605	-1.99282	FALSE	-0.666385	FALSE	-0.543287	FALSE	-1.90013	Down	-0.962575	FALSE	-0.229255	FALSE
chr1	13869246	13869326	chr1:13869246-13869326	3.93363	-0.870678	FALSE	0.497649	FALSE	-0.788646	FALSE	0.728708	FALSE	-0.770949	FALSE	0.594837	FALSE
chr1	13872604	13872851	chr1:13872604-13872851	7.93084	-2.75087	FALSE	-3.25919	FALSE	-1.96209	Down	-1.75154	FALSE	-3.28612	Down	-4.49993	Down
chr1	13873154	13873309	chr1:13873154-13873309	5.21462	-0.163862	FALSE	-2.24799	FALSE	-3.34805	Down	-2.96028	Down	-2.55355	FALSE	-2.11793	Down
chr1	13938503	13938578	chr1:13938503-13938578	6.73044	-0.798146	FALSE	-3.75814	FALSE	-5.77819	Down	-6.67536	Down	-1.00455	FALSE	-0.469959	FALSE
chr1	13941450	13942134	chr1:13941450-13942134	9.81493	0.154781	FALSE	-0.615016	FALSE	-0.693028	FALSE	-1.08405	FALSE	-1.0412	FALSE	-1.57504	FALSE
chr1	13942436	13942591	chr1:13942436-13942591	9.75247	-0.451029	FALSE	-0.482503	FALSE	-0.362417	FALSE	-1.68717	Down	-1.11643	FALSE	-1.5134	FALSE
chr1	14027056	14027148	chr1:14027056-14027148	2.87251	2.05494	FALSE	1.08583	FALSE	-0.99394	FALSE	-0.449647	FALSE	-0.57905	FALSE	-1.2774	FALSE
chr1	14068152	14068206	chr1:14068152-14068206	2.45329	-0.181819	FALSE	-0.952424	FALSE	-2.00653	FALSE	0.00171857	FALSE	-1.80449	FALSE	0.156803	FALSE
chr1	14070009	14070211	chr1:14070009-14070211	4.26236	-3.10771	FALSE	-2.34697	FALSE	-2.60256	FALSE	-3.39231	Down	-1.53822	FALSE	-1.74893	FALSE
chr1	14095711	14095805	chr1:14095711-14095805	4.36554	0.575032	FALSE	-1.20555	FALSE	-0.614106	FALSE	-3.48313	Down	0.655365	FALSE	-1.13995	FALSE
chr1	14101246	14101359	chr1:14101246-14101359	4.73527	-3.35529	FALSE	-1.05296	FALSE	-2.31022	FALSE	-3.08458	Down	-2.89004	Down	-2.90528	Down
chr1	14156338	14156524	chr1:14156338-14156524	2.311	0.791943	FALSE	0.990281	FALSE	0.61009	FALSE	-3.51387	Down	1.54936	FALSE	-0.678011	FALSE
chr1	14161884	14162011	chr1:14161884-14162011	1.71257	0	FALSE	-2.27505	FALSE	-3.69383	FALSE	-3.93933	Down	1.1355	FALSE	-2.23159	FALSE
chr1	14173341	14173417	chr1:14173341-14173417	4.27077	-1.42614	FALSE	-0.391146	FALSE	3.40382	Up	1.7949	FALSE	0.0503478	FALSE	-0.181366	FALSE
chr1	14225472	14225719	chr1:14225472-14225719	3.61488	0	FALSE	0.962233	FALSE	-3.15319	FALSE	-4.29606	Down	0.60653	FALSE	-1.79353	FALSE
chr1	14233442	14233645	chr1:14233442-14233645	6.1209	1.66801	FALSE	-0.284992	FALSE	-0.161381	FALSE	-1.8857	Down	-1.83144	FALSE	-1.98933	FALSE
chr1	14242233	14242311	chr1:14242233-14242311	4.26728	1.13864	FALSE	-1.28926	FALSE	2.12057	FALSE	0.23156	FALSE	-0.479511	FALSE	0.631727	FALSE
chr1	14250145	14250164	chr1:14250145-14250164	6.76328	-0.879309	FALSE	0.375425	FALSE	0.848476	FALSE	1.65108	Up	-0.404623	FALSE	1.55425	FALSE
chr1	14250370	14250530	chr1:14250370-14250530	17.0264	-1.07185	FALSE	-0.595711	FALSE	1.06148	FALSE	0.623856	FALSE	-0.480189	FALSE	0.95027	FALSE
chr1	14273636	14273861	chr1:14273636-14273861	4.80569	-0.0741202	FALSE	-1.93944	FALSE	-0.386123	FALSE	-1.15386	FALSE	-0.895743	FALSE	0.696627	FALSE
chr1	14274112	14274129	chr1:14274112-14274129	4.66421	-2.57808	FALSE	-1.59377	FALSE	-0.674958	FALSE	-0.488754	FALSE	0.596411	FALSE	1.30428	FALSE
chr1	14288498	14288569	chr1:14288498-14288569	10.726	-0.874752	FALSE	-1.61065	FALSE	-2.13061	Down	-1.55204	Down	-0.235598	FALSE	-0.0454093	FALSE
chr1	14292120	14292498	chr1:14292120-14292498	32.1422	-3.43762	Down	-2.64472	Down	-4.00093	Down	-3.37067	Down	-0.671323	FALSE	-0.14157	FALSE
chr1	14304675	14304736	chr1:14304675-14304736	5.65405	1.1901	FALSE	-1.58481	FALSE	-3.58502	Down	-2.76531	Down	0.496586	FALSE	-0.288401	FALSE
chr1	14304957	14305075	chr1:14304957-14305075	3.61124	-1.94909	FALSE	-1.75566	FALSE	-2.7581	FALSE	-1.68933	FALSE	0.280883	FALSE	-1.53171	FALSE
chr1	14309753	14310194	chr1:14309753-14310194	5.48703	-2.0147	FALSE	-0.596732	FALSE	-1.30317	FALSE	-1.16424	FALSE	-0.590383	FALSE	-0.32321	FALSE
chr1	14312696	14312762	chr1:14312696-14312762	3.29351	-2.41624	FALSE	-2.28716	FALSE	-3.56988	Down	-5.00484	Down	-2.04252	FALSE	-1.95824	FALSE
chr1	14421182	14421245	chr1:14421182-14421245	2.28004	-1.67666	FALSE	-1.33868	FALSE	-1.34783	FALSE	-3.28193	Down	-0.944004	FALSE	-4.13863	Down
chr1	14462558	14462574	chr1:14462558-14462574	2.0985	0	FALSE	-0.901849	FALSE	-0.625879	FALSE	-2.74124	FALSE	-0.536123	FALSE	-0.600227	FALSE
chr1	14484257	14484323	chr1:14484257-14484323	6.08772	-0.326676	FALSE	0.350938	FALSE	-0.413518	FALSE	-0.193539	FALSE	-0.402759	FALSE	-0.320286	FALSE
chr1	14506676	14506755	chr1:14506676-14506755	6.5461	0.619128	FALSE	-0.41663	FALSE	-0.401686	FALSE	-0.673121	FALSE	0.0716719	FALSE	-0.0146092	FALSE
chr1	14621703	14621757	chr1:14621703-14621757	2.11852	-2.97746	FALSE	0.45191	FALSE	-1.0786	FALSE	-2.10834	FALSE	0.0129276	FALSE	-1.62111	FALSE
chr1	14632101	14632211	chr1:14632101-14632211	59.6567	0.341436	FALSE	1.156	FALSE	-0.421932	FALSE	-1.28027	Down	-1.49859	Down	-2.6122	Down
chr1	14650590	14650789	chr1:14650590-14650789	3.47114	-3.87113	FALSE	0.987766	FALSE	-1.69811	FALSE	-3.84217	Down	-1.28852	FALSE	-2.84748	FALSE
chr1	14660983	14661065	chr1:14660983-14661065	5.18716	0.512205	FALSE	2.5959	FALSE	0.932404	FALSE	-0.724779	FALSE	-0.644033	FALSE	-0.409944	FALSE
chr1	14688189	14688283	chr1:14688189-14688283	19.7138	0.387157	FALSE	1.22553	FALSE	-1.34626	Down	-2.61032	Down	-1.31763	FALSE	-2.97485	Down
chr1	14689908	14689921	chr1:14689908-14689921	2.71976	1.31352	FALSE	1.47295	FALSE	-1.96176	FALSE	-1.27907	FALSE	-0.258606	FALSE	-2.21132	FALSE
chr1	14705648	14705746	chr1:14705648-14705746	2.29216	-0.138108	FALSE	0.748067	FALSE	-2.15327	FALSE	-3.25039	Down	0.166879	FALSE	-1.16348	FALSE
chr1	14734251	14734409	chr1:14734251-14734409	3.79552	-0.609605	FALSE	-0.905674	FALSE	-0.497815	FALSE	-1.83341	Down	-2.13436	FALSE	-2.35495	Down
chr1	14743264	14743425	chr1:14743264-14743425	94.461	0.0441707	FALSE	-0.367693	FALSE	-0.278957	FALSE	-0.588889	Down	-0.322285	FALSE	0.116956	FALSE
chr1	14743678	14743816	chr1:14743678-14743816	25.0446	-0.358284	FALSE	-0.450371	FALSE	0.288423	FALSE	0.702688	FALSE	-0.246047	FALSE	0.117575	FALSE
chr1	14755323	14755500	chr1:14755323-14755500	25.9491	0.0567947	FALSE	0.0221921	FALSE	0.359401	FALSE	-0.0630882	FALSE	0.12743	FALSE	-0.276038	FALSE
chr1	14759543	14759682	chr1:14759543-14759682	12.8749	-0.371333	FALSE	0.111803	FALSE	-0.22686	FALSE	-1.28982	Down	0.362195	FALSE	-1.07503	FALSE
chr1	14764477	14764870	chr1:14764477-14764870	15.8163	-0.161974	FALSE	0.324396	FALSE	-0.500529	FALSE	-0.802465	FALSE	-0.463253	FALSE	-0.179545	FALSE
chr1	14775412	14775615	chr1:14775412-14775615	4.13633	-1.87499	FALSE	-0.399396	FALSE	-0.629639	FALSE	-1.08707	FALSE	0.525605	FALSE	0.57368	FALSE
chr1	14879373	14879389	chr1:14879373-14879389	2.9006	1.85549	FALSE	-1.03596	FALSE	1.49417	FALSE	-0.711187	FALSE	-2.3153	FALSE	1.99707	FALSE
chr1	14912071	14912154	chr1:14912071-14912154	4.87771	-0.974405	FALSE	-0.685237	FALSE	-2.44835	FALSE	-0.607296	FALSE	1.94062	FALSE	0.606606	FALSE
chr1	14912908	14913098	chr1:14912908-14913098	6.10275	0.235835	FALSE	0.873419	FALSE	0.978069	FALSE	0.141205	FALSE	1.07689	FALSE	-0.308674	FALSE
chr1	14918876	14918999	chr1:14918876-14918999	13.2881	0.141599	FALSE	-0.221726	FALSE	-1.11628	FALSE	-1.55831	Down	0.134886	FALSE	-0.152034	FALSE
chr1	14919440	14919485	chr1:14919440-14919485	5.37749	-0.963176	FALSE	-0.473095	FALSE	-1.16356	FALSE	-0.372471	FALSE	-0.34008	FALSE	-0.966698	FALSE
chr1	14949095	14949163	chr1:14949095-14949163	5.80288	1.00255	FALSE	1.47183	FALSE	1.51326	FALSE	-0.086127	FALSE	1.65288	FALSE	-0.653763	FALSE
chr1	14963068	14963243	chr1:14963068-14963243	4.71267	0.643776	FALSE	0.939807	FALSE	-0.947691	FALSE	-3.49924	Down	0.124845	FALSE	-0.400782	FALSE
chr1	15017836	15017952	chr1:15017836-15017952	6.60456	1.6841	FALSE	-0.159516	FALSE	0.760323	FALSE	-0.584006	FALSE	-0.593025	FALSE	-1.33235	FALSE
chr1	15051348	15051674	chr1:15051348-15051674	11.874	-0.693729	FALSE	-0.13965	FALSE	0.337168	FALSE	0.392951	FALSE	-0.223632	FALSE	-0.0140477	FALSE
chr1	15053192	15053201	chr1:15053192-15053201	3.45248	-0.216305	FALSE	-1.34422	FALSE	0.404513	FALSE	2.13766	Up	-1.34336	FALSE	1.40119	FALSE
chr1	15061669	15061848	chr1:15061669-15061848	17.4978	0.795508	FALSE	0.17589	FALSE	-0.29337	FALSE	-0.20416	FALSE	-0.393997	FALSE	-0.524152	FALSE
chr1	15062648	15062951	chr1:15062648-15062951	30.2071	-0.257678	FALSE	0.0404769	FALSE	-0.472633	FALSE	0.240595	FALSE	0.457083	FALSE	0.799703	FALSE
chr1	15072753	15072796	chr1:15072753-15072796	3.38819	0.573554	FALSE	-0.439202	FALSE	0.261078	FALSE	0.707646	FALSE	-0.686139	FALSE	0.517783	FALSE
chr1	15073778	15074311	chr1:15073778-15074311	7.31322	-1.02609	FALSE	-1.29192	FALSE	0.0731172	FALSE	-1.21586	FALSE	-1.34307	FALSE	-1.18842	FALSE
chr1	15079832	15079960	chr1:15079832-15079960	6.54794	0.992943	FALSE	0.170239	FALSE	0.634757	FALSE	1.36444	FALSE	-1.0472	FALSE	1.24433	FALSE
chr1	15138593	15138681	chr1:15138593-15138681	2.40944	-0.131182	FALSE	1.33269	FALSE	-0.639866	FALSE	-1.47753	FALSE	-1.75161	FALSE	-3.74033	FALSE
chr1	15152576	15152624	chr1:15152576-15152624	5.34149	-0.132448	FALSE	-0.498328	FALSE	-0.712356	FALSE	-0.857341	FALSE	0.259128	FALSE	0.726479	FALSE
chr1	15286538	15286835	chr1:15286538-15286835	7.97467	-0.0843178	FALSE	-0.672983	FALSE	0.818723	FALSE	-0.691052	FALSE	1.47418	FALSE	-0.612279	FALSE
chr1	15327487	15327547	chr1:15327487-15327547	5.10842	-1.24997	FALSE	-0.703471	FALSE	0.654773	FALSE	-1.80937	FALSE	-0.493616	FALSE	-0.648044	FALSE
chr1	15437052	15437116	chr1:15437052-15437116	3.07801	1.15974	FALSE	1.15017	FALSE	0.291602	FALSE	-1.42961	FALSE	3.05141	FALSE	0.371736	FALSE
chr1	15643517	15643519	chr1:15643517-15643519	2.19159	-0.445973	FALSE	-1.48692	FALSE	-0.441556	FALSE	0.662599	FALSE	-1.5941	FALSE	-1.1428	FALSE
chr1	15644065	15644413	chr1:15644065-15644413	3.94961	0.244299	FALSE	-0.420899	FALSE	-0.518285	FALSE	-2.28502	FALSE	1.19339	FALSE	0.0831912	FALSE
chr1	15755022	15755230	chr1:15755022-15755230	5.50305	-1.39362	FALSE	-2.0261	FALSE	-4.31997	Down	-2.2684	Down	-0.578529	FALSE	-1.27072	FALSE
chr1	15791735	15792039	chr1:15791735-15792039	26.7581	-1.26958	FALSE	-2.11492	Down	-2.61085	Down	-2.82507	Down	-1.54475	Down	-1.43281	Down
chr1	15792696	15792748	chr1:15792696-15792748	4.37264	-1.87364	FALSE	-0.921138	FALSE	-4.51953	Down	-5.52806	Down	-2.35196	FALSE	-1.6628	FALSE
chr1	15801435	15801578	chr1:15801435-15801578	14.9253	0.456865	FALSE	0.793584	FALSE	-0.933244	FALSE	-0.870746	FALSE	-1.54472	FALSE	-1.88821	Down
chr1	15803037	15803158	chr1:15803037-15803158	16.448	0.67945	FALSE	0.664075	FALSE	-0.890376	FALSE	-2.52056	Down	-0.947593	FALSE	-0.731462	FALSE
chr1	15803722	15803784	chr1:15803722-15803784	9.99653	0.528104	FALSE	-0.453176	FALSE	-0.945191	FALSE	0.0569471	FALSE	-0.568049	FALSE	-0.955577	FALSE
chr1	15804737	15804754	chr1:15804737-15804754	11.2912	-0.354158	FALSE	-0.307444	FALSE	-1.19508	FALSE	-2.60094	Down	-1.37646	FALSE	-0.246642	FALSE
chr1	15805004	15805063	chr1:15805004-15805063	16.4308	-0.507935	FALSE	-0.234953	FALSE	-1.24408	FALSE	-1.46122	Down	-1.25246	FALSE	-0.993366	FALSE
chr1	15805529	15805621	chr1:15805529-15805621	65.2138	-0.227402	FALSE	0.207245	FALSE	-0.185777	FALSE	-0.441958	FALSE	-0.324991	FALSE	0.0598241	FALSE
chr1	15814155	15814315	chr1:15814155-15814315	5.17934	-1.81896	FALSE	0.136321	FALSE	-1.66684	FALSE	-2.1377	Down	-0.223325	FALSE	-1.00707	FALSE
chr1	15814782	15814893	chr1:15814782-15814893	7.11532	-0.702346	FALSE	-1.74911	FALSE	-2.28628	Down	-2.56938	Down	-2.84678	Down	-1.84859	Down
chr1	15815117	15815167	chr1:15815117-15815167	18.2345	-1.09399	FALSE	-1.5998	FALSE	-2.33957	Down	-3.53997	Down	-3.18634	Down	-2.6202	Down
chr1	15815400	15815489	chr1:15815400-15815489	7.91569	0.523993	FALSE	-0.386623	FALSE	-3.58397	Down	-2.21341	Down	-3.28833	Down	-1.33299	FALSE
chr1	15820626	15820725	chr1:15820626-15820725	8.26691	-0.165922	FALSE	-0.395581	FALSE	-1.46157	FALSE	-1.98827	Down	-1.23635	FALSE	-0.845487	FALSE
chr1	15838547	15838603	chr1:15838547-15838603	3.76145	1.29696	FALSE	0.725089	FALSE	0.133717	FALSE	-2.0639	FALSE	1.43607	FALSE	-0.310428	FALSE
chr1	15841194	15841358	chr1:15841194-15841358	18.6126	1.02026	FALSE	-0.198614	FALSE	-1.49927	Down	-1.23576	Down	-0.768354	FALSE	-0.551431	FALSE
chr1	15852697	15852754	chr1:15852697-15852754	5.58331	0.2086	FALSE	1.40127	FALSE	-1.09735	FALSE	-1.77643	Down	-1.25303	FALSE	-0.128698	FALSE
chr1	15860992	15861096	chr1:15860992-15861096	4.60865	-0.547098	FALSE	0.199157	FALSE	-0.0911473	FALSE	-4.24231	Down	-0.257328	FALSE	-0.668056	FALSE
chr1	15862185	15862260	chr1:15862185-15862260	4.03918	1.13995	FALSE	-0.742586	FALSE	0.438309	FALSE	-1.90065	FALSE	1.15566	FALSE	-2.08965	FALSE
chr1	15867378	15867432	chr1:15867378-15867432	2.769	-2.06878	FALSE	-2.57819	FALSE	-4.7096	Down	-3.4382	Down	-2.58531	FALSE	-3.18964	FALSE
chr1	15892510	15892771	chr1:15892510-15892771	8.70019	0.185073	FALSE	0.546196	FALSE	-0.319173	FALSE	0.908644	FALSE	-0.797009	FALSE	-0.914388	FALSE
chr1	15900163	15900295	chr1:15900163-15900295	10.1967	0.229282	FALSE	0.479118	FALSE	-0.892389	FALSE	-1.17567	FALSE	-0.145153	FALSE	0.105352	FALSE
chr1	15901491	15901501	chr1:15901491-15901501	3.59947	0.0828846	FALSE	0.439378	FALSE	0.907449	FALSE	0.945564	FALSE	1.03494	FALSE	1.06087	FALSE
chr1	15902566	15902618	chr1:15902566-15902618	4.05385	0.621009	FALSE	0.566264	FALSE	-1.26226	FALSE	0.0432568	FALSE	-0.389081	FALSE	-0.438974	FALSE
chr1	15909374	15909531	chr1:15909374-15909531	5.66092	-1.9629	FALSE	-1.23063	FALSE	-1.66506	FALSE	-2.15408	FALSE	0.38961	FALSE	0.363503	FALSE
chr1	15920222	15920359	chr1:15920222-15920359	38.2645	0.314974	FALSE	0.0510364	FALSE	1.08559	Up	1.09527	Up	0.308934	FALSE	0.884995	Up
chr1	15936002	15936048	chr1:15936002-15936048	5.60309	-0.263078	FALSE	0.283748	FALSE	1.85374	FALSE	2.55277	Up	0.465107	FALSE	0.159442	FALSE
chr1	15936763	15936996	chr1:15936763-15936996	16.7176	-0.917342	FALSE	0.25292	FALSE	2.20467	Up	2.77788	Up	0.609685	FALSE	1.00478	FALSE
chr1	15975179	15975216	chr1:15975179-15975216	3.19471	0.605642	FALSE	-0.486011	FALSE	-0.91324	FALSE	0.24787	FALSE	-1.14977	FALSE	0.214222	FALSE
chr1	15993759	15993789	chr1:15993759-15993789	4.4819	-0.0124291	FALSE	-0.284145	FALSE	-0.0701217	FALSE	-0.755504	FALSE	-0.709299	FALSE	-0.109494	FALSE
chr1	16000530	16000564	chr1:16000530-16000564	3.43772	0.89278	FALSE	0.498838	FALSE	1.69061	FALSE	-0.477427	FALSE	0.342455	FALSE	0.643777	FALSE
chr1	16003361	16003464	chr1:16003361-16003464	5.23859	-1.43413	FALSE	-1.13776	FALSE	-1.18492	FALSE	0.219775	FALSE	-2.72915	Down	-2.07528	Down
chr1	16005746	16005944	chr1:16005746-16005944	5.34355	-0.217903	FALSE	0.263277	FALSE	0.472836	FALSE	2.08708	FALSE	1.53368	FALSE	-0.819715	FALSE
chr1	16021390	16021444	chr1:16021390-16021444	4.38395	0.112636	FALSE	1.4688	FALSE	0.909163	FALSE	-0.100463	FALSE	0.950174	FALSE	0.167455	FALSE
chr1	16022244	16022441	chr1:16022244-16022441	6.08597	0.116251	FALSE	1.28604	FALSE	-0.426768	FALSE	1.84693	FALSE	-1.96646	FALSE	-2.19737	FALSE
chr1	16023565	16023649	chr1:16023565-16023649	7.02947	0.679594	FALSE	1.03146	FALSE	0.0825693	FALSE	0.188429	FALSE	0.909543	FALSE	-1.57928	FALSE
chr1	16051010	16051157	chr1:16051010-16051157	3.50842	0.11077	FALSE	0.513358	FALSE	-1.74893	FALSE	-2.83661	Down	0.614973	FALSE	-0.316191	FALSE
chr1	16062096	16062116	chr1:16062096-16062116	3.97375	0.289271	FALSE	0.302441	FALSE	1.00315	FALSE	-1.32758	FALSE	-0.398198	FALSE	-0.170566	FALSE
chr1	16067239	16067323	chr1:16067239-16067323	15.0828	0.133181	FALSE	0.586909	FALSE	1.14753	FALSE	1.05727	FALSE	0.818857	FALSE	-0.557091	FALSE
chr1	16068195	16068278	chr1:16068195-16068278	8.07849	-1.24664	FALSE	0.64608	FALSE	0.450381	FALSE	-0.162448	FALSE	-0.052848	FALSE	-0.170658	FALSE
chr1	16076290	16076422	chr1:16076290-16076422	11.9171	0.17523	FALSE	1.28055	FALSE	-0.725919	FALSE	-0.961443	FALSE	-1.20167	FALSE	-1.25533	FALSE
chr1	16080108	16080509	chr1:16080108-16080509	19.8147	-0.0318978	FALSE	0.346954	FALSE	0.30015	FALSE	-0.886887	FALSE	0.573273	FALSE	0.0657115	FALSE
chr1	16081694	16081702	chr1:16081694-16081702	6.35933	1.20162	FALSE	1.31909	FALSE	1.06996	FALSE	0.704143	FALSE	-0.414221	FALSE	0.0837644	FALSE
chr1	16085790	16086326	chr1:16085790-16086326	7.30043	-1.63143	FALSE	0.914292	FALSE	0.751364	FALSE	-1.23517	FALSE	0.775368	FALSE	0.608218	FALSE
chr1	16093342	16093440	chr1:16093342-16093440	29.5113	-0.209951	FALSE	0.0646662	FALSE	0.429414	FALSE	0.0839531	FALSE	0.425456	FALSE	-0.0235084	FALSE
chr1	16093702	16094087	chr1:16093702-16094087	9.13791	-0.0901535	FALSE	0.226931	FALSE	1.20132	FALSE	0.778552	FALSE	-0.198465	FALSE	0.03199	FALSE
chr1	16100240	16100377	chr1:16100240-16100377	18.7039	-0.355402	FALSE	-0.108642	FALSE	0.530845	FALSE	1.28666	Up	0.136404	FALSE	0.273319	FALSE
chr1	16104321	16104425	chr1:16104321-16104425	15.3605	-0.697897	FALSE	0.625616	FALSE	-0.0789334	FALSE	-0.387948	FALSE	-0.281889	FALSE	0.345146	FALSE
chr1	16104689	16104862	chr1:16104689-16104862	45.6023	-0.37053	FALSE	0.0186746	FALSE	0.258666	FALSE	-0.287764	FALSE	-0.147702	FALSE	-0.0693656	FALSE
chr1	16105071	16105424	chr1:16105071-16105424	16.7907	-0.769737	FALSE	0.102659	FALSE	-0.331062	FALSE	0.312729	FALSE	0.241502	FALSE	0.627564	FALSE
chr1	16113100	16113103	chr1:16113100-16113103	3.48395	1.3445	FALSE	1.78536	FALSE	0.186272	FALSE	-0.194069	FALSE	2.10877	FALSE	0.32727	FALSE
chr1	16113491	16113620	chr1:16113491-16113620	7.38182	1.00195	FALSE	0.0789884	FALSE	-0.880132	FALSE	-2.07268	FALSE	1.9273	FALSE	0.342753	FALSE
chr1	16115929	16116034	chr1:16115929-16116034	7.40184	-0.680844	FALSE	-0.676648	FALSE	0.546275	FALSE	0.157118	FALSE	0.265516	FALSE	0.0613778	FALSE
chr1	16118365	16118415	chr1:16118365-16118415	2.94988	1.47212	FALSE	0.610359	FALSE	-0.134096	FALSE	2.62663	FALSE	1.06095	FALSE	0.62125	FALSE
chr1	16119744	16119845	chr1:16119744-16119845	4.2527	2.20188	FALSE	0.492112	FALSE	2.5455	Up	1.12799	FALSE	0.28804	FALSE	1.16793	FALSE
chr1	16122127	16122225	chr1:16122127-16122225	10.0613	-0.436023	FALSE	0.831332	FALSE	2.56272	Up	2.62382	Up	-0.632981	FALSE	-0.553982	FALSE
chr1	16130127	16130281	chr1:16130127-16130281	10.1795	-1.13494	FALSE	-1.14575	FALSE	-2.85581	Down	-2.64643	Down	-1.46116	FALSE	-3.15509	Down
chr1	16130601	16130673	chr1:16130601-16130673	4.11771	-0.757399	FALSE	-0.300244	FALSE	-0.409894	FALSE	-2.32043	Down	0.105337	FALSE	-1.98658	FALSE
chr1	16159580	16159665	chr1:16159580-16159665	7.31593	0.297335	FALSE	-0.535905	FALSE	0.901554	FALSE	1.28157	FALSE	0.599301	FALSE	0.8259	FALSE
chr1	16160213	16160278	chr1:16160213-16160278	5.51463	0.29132	FALSE	-1.18134	FALSE	0.345821	FALSE	-1.01175	FALSE	-0.244585	FALSE	-1.00182	FALSE
chr1	16172180	16172245	chr1:16172180-16172245	2.93181	-1.26058	FALSE	-0.0884526	FALSE	-0.14707	FALSE	-0.194574	FALSE	0.441154	FALSE	1.16143	FALSE
chr1	16172498	16172556	chr1:16172498-16172556	2.30044	-0.237368	FALSE	-1.64494	FALSE	-0.203542	FALSE	0.153466	FALSE	2.70705	FALSE	0.481694	FALSE
chr1	16177641	16177876	chr1:16177641-16177876	7.98207	0.482212	FALSE	0.869549	FALSE	-0.639016	FALSE	0.033475	FALSE	0.321682	FALSE	1.6168	FALSE
chr1	16183925	16184068	chr1:16183925-16184068	9.86805	-0.949047	FALSE	-0.847508	FALSE	-2.51637	FALSE	-2.46476	FALSE	0.192421	FALSE	-0.855597	FALSE
chr1	16195319	16195653	chr1:16195319-16195653	4.6131	0.174744	FALSE	1.0673	FALSE	1.37334	FALSE	1.36247	FALSE	-0.95592	FALSE	-0.36149	FALSE
chr1	16195861	16196130	chr1:16195861-16196130	5.32423	0.677109	FALSE	1.14256	FALSE	0.0751062	FALSE	0.299992	FALSE	-0.224308	FALSE	-0.491719	FALSE
chr1	16205652	16205870	chr1:16205652-16205870	18.055	0.33786	FALSE	0.00803321	FALSE	-0.151717	FALSE	0.0474456	FALSE	0.170535	FALSE	0.416509	FALSE
chr1	16206076	16206212	chr1:16206076-16206212	59.0481	0.427767	FALSE	0.215654	FALSE	-0.270674	FALSE	0.084172	FALSE	0.0247164	FALSE	0.0960524	FALSE
chr1	16213146	16213198	chr1:16213146-16213198	5.32259	1.17699	FALSE	-0.405725	FALSE	-1.39303	FALSE	-1.41442	FALSE	0.765301	FALSE	-1.31456	FALSE
chr1	16215125	16215159	chr1:16215125-16215159	3.16554	-3.00811	FALSE	-3.89512	FALSE	-2.46719	FALSE	-0.0382095	FALSE	0.468892	FALSE	0.691076	FALSE
chr1	16231660	16231815	chr1:16231660-16231815	4.73658	0.806323	FALSE	0.103066	FALSE	1.13796	FALSE	1.42973	FALSE	-0.203443	FALSE	1.09011	FALSE
chr1	16241107	16241247	chr1:16241107-16241247	2.2586	0.286396	FALSE	-0.115188	FALSE	-1.83469	FALSE	1.79219	FALSE	-0.448907	FALSE	0.330769	FALSE
chr1	16268915	16269206	chr1:16268915-16269206	4.6565	1.18503	FALSE	0.226554	FALSE	0.146571	FALSE	0.757585	FALSE	0.924031	FALSE	0.0200813	FALSE
chr1	16306577	16306664	chr1:16306577-16306664	4.63155	-2.83775	FALSE	-1.59104	FALSE	-0.639993	FALSE	0.641039	FALSE	-0.27483	FALSE	-0.485455	FALSE
chr1	16359553	16359587	chr1:16359553-16359587	2.95145	-0.333557	FALSE	-2.86891	FALSE	1.50329	FALSE	0.000347384	FALSE	-0.449849	FALSE	1.39642	FALSE
chr1	16372227	16372318	chr1:16372227-16372318	6.25205	0.184491	FALSE	0.905188	FALSE	0.974941	FALSE	0.190192	FALSE	1.95238	FALSE	0.359719	FALSE
chr1	16408242	16408264	chr1:16408242-16408264	2.64107	-1.19259	FALSE	-1.58742	FALSE	2.30245	FALSE	2.76711	Up	-0.339671	FALSE	1.80002	FALSE
chr1	16518611	16518818	chr1:16518611-16518818	5.84827	-0.0566405	FALSE	-0.107405	FALSE	1.20789	FALSE	0.355894	FALSE	-0.286598	FALSE	-0.035037	FALSE
chr1	16519047	16519253	chr1:16519047-16519253	7.12846	0.455691	FALSE	-0.281804	FALSE	0.165927	FALSE	0.190727	FALSE	-0.539944	FALSE	1.01124	FALSE
chr1	16519822	16520098	chr1:16519822-16520098	9.15242	-0.379915	FALSE	-0.47656	FALSE	-0.464143	FALSE	0.0313265	FALSE	-0.180459	FALSE	-0.0663152	FALSE
chr1	16537636	16537690	chr1:16537636-16537690	2.47623	0.518347	FALSE	1.32305	FALSE	-1.75222	FALSE	-0.601315	FALSE	1.77374	FALSE	-1.57492	FALSE
chr1	16553298	16553312	chr1:16553298-16553312	3.19054	-2.77651	FALSE	-1.58736	FALSE	0.916872	FALSE	0.256297	FALSE	1.40702	FALSE	2.05035	FALSE
chr1	16554127	16554139	chr1:16554127-16554139	2.82631	0.743458	FALSE	-0.551482	FALSE	-0.674132	FALSE	-0.753205	FALSE	1.53521	FALSE	-1.12	FALSE
chr1	16602702	16602821	chr1:16602702-16602821	3.65634	1.20593	FALSE	0.000938733	FALSE	-1.75948	FALSE	-0.496572	FALSE	0.317766	FALSE	0.858138	FALSE
chr1	16608513	16608700	chr1:16608513-16608700	6.11757	0.608655	FALSE	1.35012	FALSE	0.803594	FALSE	0.0452038	FALSE	1.97246	FALSE	-0.835334	FALSE
chr1	16616667	16616733	chr1:16616667-16616733	7.28091	0.419155	FALSE	-0.315527	FALSE	-0.969358	FALSE	-0.0210565	FALSE	0.680631	FALSE	-0.42246	FALSE
chr1	16619310	16619498	chr1:16619310-16619498	28.6312	0.057119	FALSE	-0.0828237	FALSE	-0.4715	FALSE	-0.0451601	FALSE	0.151693	FALSE	0.0508808	FALSE
chr1	16626084	16626248	chr1:16626084-16626248	5.85886	0.123486	FALSE	-0.113622	FALSE	-0.999807	FALSE	0.265452	FALSE	1.35704	FALSE	0.580014	FALSE
chr1	16629524	16629573	chr1:16629524-16629573	7.6146	-0.108944	FALSE	0.560639	FALSE	-0.129773	FALSE	0.826528	FALSE	0.206971	FALSE	0.257346	FALSE
chr1	16631400	16631575	chr1:16631400-16631575	11.7573	0.193897	FALSE	-0.372557	FALSE	-1.13356	FALSE	0.62513	FALSE	0.840087	FALSE	-0.573372	FALSE
chr1	16639944	16639968	chr1:16639944-16639968	10.26	1.08157	FALSE	1.10788	FALSE	-0.466484	FALSE	-0.274682	FALSE	-1.04708	FALSE	0.0140609	FALSE
chr1	16640194	16640441	chr1:16640194-16640441	13.4149	0.737033	FALSE	0.90291	FALSE	-0.342292	FALSE	-0.501448	FALSE	-0.53483	FALSE	-0.538961	FALSE
chr1	16640786	16640845	chr1:16640786-16640845	13.404	-0.0010115	FALSE	-0.263532	FALSE	-0.13034	FALSE	-0.320272	FALSE	-0.629439	FALSE	-1.31873	FALSE
chr1	16642295	16642426	chr1:16642295-16642426	10.5534	-0.573835	FALSE	0.875117	FALSE	-0.752692	FALSE	-1.13266	FALSE	-0.119042	FALSE	-0.811182	FALSE
chr1	16650643	16650650	chr1:16650643-16650650	11.1528	0.427443	FALSE	0.361568	FALSE	-0.525129	FALSE	-0.479329	FALSE	-0.60311	FALSE	-0.235664	FALSE
chr1	16651564	16651614	chr1:16651564-16651614	19.4673	0.0127823	FALSE	0.0764358	FALSE	-0.586438	FALSE	-0.276258	FALSE	-1.4069	Down	-0.052981	FALSE
chr1	16655189	16655467	chr1:16655189-16655467	27.195	-1.14396	FALSE	-0.0355981	FALSE	-1.05315	FALSE	-1.15943	Down	-0.807523	FALSE	-0.663069	FALSE
chr1	16657021	16657199	chr1:16657021-16657199	53.8938	-0.0964938	FALSE	-0.0129923	FALSE	-0.0521523	FALSE	-0.147077	FALSE	0.165042	FALSE	0.123627	FALSE
chr1	16657431	16657505	chr1:16657431-16657505	24.1632	-0.454462	FALSE	-0.00579004	FALSE	-0.548318	FALSE	-1.12927	FALSE	0.594648	FALSE	-0.200256	FALSE
chr1	16660292	16660441	chr1:16660292-16660441	6.15214	-2.20392	FALSE	1.87259	FALSE	-0.622286	FALSE	1.42193	FALSE	1.03604	FALSE	1.59147	FALSE
chr1	16665222	16665270	chr1:16665222-16665270	12.6231	-0.0912084	FALSE	0.583595	FALSE	-0.0345046	FALSE	-0.361324	FALSE	0.430524	FALSE	0.00877785	FALSE
chr1	16667396	16667491	chr1:16667396-16667491	25.9113	-0.200599	FALSE	0.0682309	FALSE	0.633157	FALSE	0.0999182	FALSE	-0.727174	FALSE	-0.0219398	FALSE
chr1	16669284	16669366	chr1:16669284-16669366	79.5018	-0.0351676	FALSE	0.408439	FALSE	-0.175284	FALSE	0.0609227	FALSE	-0.500065	FALSE	0.14468	FALSE
chr1	16674561	16674640	chr1:16674561-16674640	10.1008	-1.62182	FALSE	0.795439	FALSE	-1.93413	Down	-2.67945	Down	-1.38697	FALSE	-0.716609	FALSE
chr1	16682323	16682589	chr1:16682323-16682589	27.6159	-0.444653	FALSE	0.544877	FALSE	-0.7645	FALSE	-1.38653	Down	-1.05891	FALSE	-1.11574	Down
chr1	16683604	16683680	chr1:16683604-16683680	29.8074	0.209048	FALSE	0.540223	FALSE	-0.832894	FALSE	-1.03478	Down	-0.08912	FALSE	0.0493732	FALSE
chr1	16685300	16685464	chr1:16685300-16685464	9.66318	0.252326	FALSE	0.778035	FALSE	1.0039	FALSE	-0.19095	FALSE	-0.644275	FALSE	0.772216	FALSE
chr1	16686951	16687095	chr1:16686951-16687095	32.3937	-0.149755	FALSE	0.51342	FALSE	-0.457349	FALSE	-0.628136	FALSE	-1.03361	FALSE	-1.33908	Down
chr1	16688355	16688420	chr1:16688355-16688420	10.7793	-0.690049	FALSE	-1.45876	FALSE	-1.51535	FALSE	-0.739927	FALSE	-1.38805	FALSE	-0.283739	FALSE
chr1	16695071	16695097	chr1:16695071-16695097	2.72213	-1.10817	FALSE	0.526329	FALSE	-3.48557	FALSE	-1.40193	FALSE	-0.122178	FALSE	1.03245	FALSE
chr1	16703021	16703130	chr1:16703021-16703130	5.4081	-2.04572	FALSE	-0.0111248	FALSE	1.09624	FALSE	1.50109	FALSE	-0.0182498	FALSE	-0.108453	FALSE
chr1	16715271	16715318	chr1:16715271-16715318	3.55485	0.0253222	FALSE	0.490214	FALSE	-0.151745	FALSE	-0.660397	FALSE	0.0412525	FALSE	1.10599	FALSE
chr1	16721207	16721242	chr1:16721207-16721242	5.35724	-0.393464	FALSE	0.255038	FALSE	-0.62661	FALSE	-1.82594	FALSE	-0.430017	FALSE	-0.611163	FALSE
chr1	16722325	16722399	chr1:16722325-16722399	13.2799	0.395688	FALSE	0.870754	FALSE	-0.244681	FALSE	1.29508	FALSE	0.85646	FALSE	0.715791	FALSE
chr1	16723733	16723813	chr1:16723733-16723813	5.37404	1.01903	FALSE	0.982657	FALSE	-0.96281	FALSE	-0.86093	FALSE	0.00517491	FALSE	0.05675	FALSE
chr1	16748451	16748457	chr1:16748451-16748457	2.19826	0.392469	FALSE	1.31492	FALSE	1.69183	FALSE	-0.316228	FALSE	-0.891495	FALSE	-0.252613	FALSE
chr1	16780524	16780693	chr1:16780524-16780693	9.56175	-1.75187	FALSE	-0.411129	FALSE	-1.8588	FALSE	-0.388697	FALSE	0.207413	FALSE	-0.398843	FALSE
chr1	16792651	16792784	chr1:16792651-16792784	23.5635	0.00786351	FALSE	0.487025	FALSE	0.660419	FALSE	0.745172	FALSE	0.129323	FALSE	0.785852	FALSE
chr1	16793008	16793376	chr1:16793008-16793376	11.8523	0.115015	FALSE	0.562714	FALSE	0.453701	FALSE	1.95577	Up	-0.000787266	FALSE	0.835369	FALSE
chr1	16795876	16796017	chr1:16795876-16796017	8.92692	-0.558878	FALSE	-0.197855	FALSE	0.995565	FALSE	1.3385	FALSE	-0.911394	FALSE	0.660241	FALSE
chr1	16796635	16796704	chr1:16796635-16796704	14.7221	2.63025	FALSE	-1.03681	FALSE	0.965012	FALSE	1.59257	Up	0.635872	FALSE	1.31538	FALSE
chr1	16797631	16797680	chr1:16797631-16797680	6.58306	-2.02483	FALSE	-1.22536	FALSE	-0.872948	FALSE	-0.535065	FALSE	-0.615879	FALSE	-0.901347	FALSE
chr1	16814013	16814191	chr1:16814013-16814191	34.5726	-1.48404	FALSE	-2.17238	Down	-2.88509	Down	-2.6542	Down	-0.163537	FALSE	0.291334	FALSE
chr1	16817660	16817845	chr1:16817660-16817845	19.1114	-0.621564	FALSE	-0.423044	FALSE	-0.468977	FALSE	-0.295996	FALSE	0.602525	FALSE	0.423089	FALSE
chr1	16818122	16818126	chr1:16818122-16818126	9.02615	0.647441	FALSE	1.25114	FALSE	-0.613681	FALSE	-0.56909	FALSE	0.204151	FALSE	0.726174	FALSE
chr1	16819900	16819987	chr1:16819900-16819987	12.4298	-0.179208	FALSE	-0.323898	FALSE	0.0406556	FALSE	0.0742255	FALSE	0.870336	FALSE	0.555325	FALSE
chr1	16824583	16824704	chr1:16824583-16824704	18.2942	-1.64959	FALSE	-1.76649	FALSE	-1.54409	Down	-1.50904	Down	-1.19625	FALSE	-1.38971	Down
chr1	16824948	16824979	chr1:16824948-16824979	13.2283	-0.539309	FALSE	-0.371535	FALSE	-1.0234	FALSE	-1.57928	Down	-2.20262	Down	-1.41351	Down
chr1	16826883	16827053	chr1:16826883-16827053	42.8674	0.0650361	FALSE	-1.2761	FALSE	-1.61825	Down	-1.26239	Down	0.0789078	FALSE	0.191838	FALSE
chr1	16827334	16827423	chr1:16827334-16827423	15.5965	0.604431	FALSE	-1.23482	FALSE	-1.36733	Down	-1.15391	FALSE	-0.658028	FALSE	-0.347293	FALSE
chr1	16829591	16829664	chr1:16829591-16829664	26.5837	0.214886	FALSE	-0.422398	FALSE	0.11765	FALSE	0.0269797	FALSE	-0.120972	FALSE	-0.108731	FALSE
chr1	16833164	16833318	chr1:16833164-16833318	8.62447	0.0950397	FALSE	-0.4902	FALSE	-0.160073	FALSE	0.0291192	FALSE	-0.671494	FALSE	0.458322	FALSE
chr1	16848492	16848609	chr1:16848492-16848609	4.61147	-1.2967	FALSE	0.46435	FALSE	-0.329331	FALSE	0.299631	FALSE	0.00144942	FALSE	0.321859	FALSE
chr1	16866178	16866217	chr1:16866178-16866217	6.06755	0.284011	FALSE	0.106708	FALSE	-1.67905	FALSE	-2.32851	Down	-1.44157	FALSE	-6.33217	Down
chr1	16867278	16867351	chr1:16867278-16867351	21.3927	0.166698	FALSE	0.0526819	FALSE	-0.182103	FALSE	-0.62507	FALSE	-1.46582	FALSE	-2.40594	Down
chr1	16867574	16867777	chr1:16867574-16867777	14.2544	-1.46815	FALSE	-0.952958	FALSE	-0.403827	FALSE	-1.63947	Down	-3.04794	Down	-4.06002	Down
chr1	16868567	16868709	chr1:16868567-16868709	7.15377	-0.864848	FALSE	-1.67736	FALSE	-3.65718	Down	-4.63718	Down	-2.35898	Down	-4.88906	Down
chr1	16878481	16878561	chr1:16878481-16878561	2.94665	0	FALSE	-0.011908	FALSE	-2.2533	FALSE	-3.46899	Down	-0.638295	FALSE	-1.52462	FALSE
chr1	16881709	16881795	chr1:16881709-16881795	15.8554	0.276347	FALSE	0.845331	FALSE	0.485603	FALSE	0.942286	FALSE	-0.568787	FALSE	-0.869391	FALSE
chr1	16887340	16887362	chr1:16887340-16887362	4.84282	2.96939	FALSE	0.467662	FALSE	0.166009	FALSE	-1.55193	FALSE	-0.84563	FALSE	0.725776	FALSE
chr1	16888460	16888616	chr1:16888460-16888616	8.94408	-0.839433	FALSE	0.552043	FALSE	0.244798	FALSE	-0.170673	FALSE	1.10226	FALSE	-0.279395	FALSE
chr1	16888894	16888966	chr1:16888894-16888966	7.22909	1.89117	FALSE	-0.435844	FALSE	1.73986	FALSE	0.40553	FALSE	0.222883	FALSE	1.13429	FALSE
chr1	16889817	16890025	chr1:16889817-16890025	27.0936	2.19762	FALSE	-0.590979	FALSE	0.679586	FALSE	0.190643	FALSE	-0.314019	FALSE	0.498388	FALSE
chr1	16900724	16900768	chr1:16900724-16900768	3.79062	0.87746	FALSE	-0.886228	FALSE	0.77417	FALSE	0.548975	FALSE	-2.02923	FALSE	0.611088	FALSE
chr1	16903402	16903562	chr1:16903402-16903562	3.8725	-0.248378	FALSE	-0.387057	FALSE	0.50168	FALSE	-0.277017	FALSE	-0.227812	FALSE	1.86005	FALSE
chr1	16918566	16919061	chr1:16918566-16919061	4.76667	0.0462689	FALSE	-0.228551	FALSE	0.512303	FALSE	1.17166	FALSE	-0.723861	FALSE	-0.362802	FALSE
chr1	16921479	16921673	chr1:16921479-16921673	16.6463	-0.149533	FALSE	-0.546288	FALSE	1.1815	FALSE	1.05111	Up	0.862279	FALSE	1.29657	Up
chr1	16937226	16937286	chr1:16937226-16937286	3.67319	-2.07416	FALSE	-0.915123	FALSE	-2.05375	FALSE	-4.00357	Down	-2.80153	FALSE	-2.49737	FALSE
chr1	16938268	16938483	chr1:16938268-16938483	6.19411	1.25938	FALSE	-3.41505	FALSE	-4.01571	Down	-2.69339	Down	-1.84798	FALSE	-1.52643	FALSE
chr1	16942085	16942305	chr1:16942085-16942305	4.37816	1.67138	FALSE	0.127765	FALSE	-0.990692	FALSE	-0.637754	FALSE	-1.15518	FALSE	0.208972	FALSE
chr1	16942511	16942975	chr1:16942511-16942975	3.1575	0.877256	FALSE	-0.831759	FALSE	-3.08855	Down	-1.21463	FALSE	0.382172	FALSE	-0.050302	FALSE
chr1	16978202	16978254	chr1:16978202-16978254	2.09721	0	FALSE	0.0703105	FALSE	2.78104	FALSE	-0.512929	FALSE	-2.4202	FALSE	-1.45177	FALSE
chr1	16980133	16980270	chr1:16980133-16980270	9.60566	-1.49457	FALSE	-0.657716	FALSE	1.52671	Up	1.04602	FALSE	-0.764034	FALSE	-0.0377784	FALSE
chr1	16996758	16996837	chr1:16996758-16996837	8.68686	-0.0835247	FALSE	-0.731112	FALSE	1.82175	Up	0.945445	FALSE	-0.176637	FALSE	1.04853	FALSE
chr1	17035308	17035405	chr1:17035308-17035405	6.73911	-0.0112888	FALSE	0.614962	FALSE	-1.34862	FALSE	1.37787	FALSE	-0.861486	FALSE	-1.12171	FALSE
chr1	17037853	17037936	chr1:17037853-17037936	6.3316	-0.351248	FALSE	0.284691	FALSE	3.36162	Up	2.8752	Up	-0.31197	FALSE	0.564434	FALSE
chr1	17039029	17039089	chr1:17039029-17039089	4.46049	-0.148305	FALSE	0.291362	FALSE	1.64573	FALSE	1.73628	FALSE	1.15806	FALSE	0.659292	FALSE
chr1	17054014	17054174	chr1:17054014-17054174	7.66878	1.05031	FALSE	0.51256	FALSE	1.03136	FALSE	0.156374	FALSE	-0.201466	FALSE	-0.372558	FALSE
chr1	17058291	17058457	chr1:17058291-17058457	5.18891	-2.93703	FALSE	0.719647	FALSE	-0.0378153	FALSE	-0.926193	FALSE	-1.75675	FALSE	-1.91513	FALSE
chr1	17072338	17072614	chr1:17072338-17072614	26.8031	0.22401	FALSE	0.524909	FALSE	0.491514	FALSE	0.00217214	FALSE	-0.533916	FALSE	-0.406387	FALSE
chr1	17096853	17096873	chr1:17096853-17096873	7.32067	0.994242	FALSE	0.195298	FALSE	0.344633	FALSE	0.606801	FALSE	0.479894	FALSE	0.470621	FALSE
chr1	17097810	17098049	chr1:17097810-17098049	27.4741	-0.639746	FALSE	0.583123	FALSE	0.357804	FALSE	0.665404	FALSE	0.422286	FALSE	0.540098	FALSE
chr1	17123546	17123716	chr1:17123546-17123716	7.97777	1.56543	FALSE	0.731565	FALSE	0.87464	FALSE	-1.23408	FALSE	1.63374	FALSE	-0.324951	FALSE
chr1	17124540	17124700	chr1:17124540-17124700	30.0982	0.134322	FALSE	0.0511928	FALSE	0.209468	FALSE	0.0410133	FALSE	0.585285	FALSE	0.0776488	FALSE
chr1	17135352	17135400	chr1:17135352-17135400	2.96875	-1.34453	FALSE	1.14173	FALSE	0.755235	FALSE	1.24065	FALSE	0.906929	FALSE	1.04897	FALSE
chr1	17175653	17175757	chr1:17175653-17175757	4.12815	-1.12175	FALSE	-1.78596	FALSE	-3.03497	Down	-4.35421	Down	-2.50198	FALSE	-4.67439	Down
chr1	17207501	17207798	chr1:17207501-17207798	3.09472	-1.95118	FALSE	1.5256	FALSE	-1.05047	FALSE	-4.10744	Down	-3.02146	FALSE	-2.65132	FALSE
chr1	17222852	17222979	chr1:17222852-17222979	23.3736	-1.31824	FALSE	-0.95324	FALSE	-1.33651	Down	-1.47665	Down	-0.429225	FALSE	-0.142496	FALSE
chr1	17223885	17224101	chr1:17223885-17224101	7.07023	-0.856856	FALSE	-1.17444	FALSE	-2.75452	Down	-1.80783	FALSE	-0.372846	FALSE	-0.282897	FALSE
chr1	17235626	17235806	chr1:17235626-17235806	14.867	-0.759615	FALSE	-1.1499	FALSE	-2.44833	Down	-2.10373	Down	-0.593165	FALSE	-0.0607048	FALSE
chr1	17240169	17240528	chr1:17240169-17240528	14.2281	-0.0918865	FALSE	-0.483523	FALSE	-0.469079	FALSE	0.365229	FALSE	0.13723	FALSE	0.213119	FALSE
chr1	17244376	17244479	chr1:17244376-17244479	5.38885	-0.0986573	FALSE	-1.08527	FALSE	-1.77685	FALSE	-1.51322	FALSE	-0.817016	FALSE	-1.10376	FALSE
chr1	17250819	17250941	chr1:17250819-17250941	34.497	1.22093	FALSE	0.280994	FALSE	-1.61401	Down	-2.18324	Down	-2.3186	Down	-3.80928	Down
chr1	17259966	17260146	chr1:17259966-17260146	6.20718	-0.625265	FALSE	-0.875428	FALSE	-0.747257	FALSE	0.316573	FALSE	0.116054	FALSE	0.226486	FALSE
chr1	17271300	17271360	chr1:17271300-17271360	1.70269	0.853372	FALSE	1.50245	FALSE	-0.1437	FALSE	-0.104711	FALSE	0.499394	FALSE	-0.0407894	FALSE
chr1	17276147	17276376	chr1:17276147-17276376	2.01068	-1.5212	FALSE	-0.813296	FALSE	1.65978	FALSE	0.724217	FALSE	-0.18393	FALSE	1.70751	FALSE
chr1	17276591	17276671	chr1:17276591-17276671	5.3868	-0.450077	FALSE	-0.335335	FALSE	1.55866	FALSE	1.55069	FALSE	-1.38859	FALSE	1.39583	FALSE
chr1	17434230	17434409	chr1:17434230-17434409	59.5671	0.519357	FALSE	-0.0532914	FALSE	-0.147205	FALSE	-0.678909	FALSE	-0.662081	FALSE	0.051023	FALSE
chr1	17488986	17489011	chr1:17488986-17489011	3.00387	-0.905524	FALSE	-1.10154	FALSE	-2.41203	FALSE	-2.42636	FALSE	-0.0917124	FALSE	0.952307	FALSE
chr1	17489389	17490058	chr1:17489389-17490058	8.92766	-1.0139	FALSE	-0.00850163	FALSE	-1.6162	FALSE	-1.8495	Down	-1.46247	FALSE	-0.238541	FALSE
chr1	17506850	17506998	chr1:17506850-17506998	2.36053	-1.50636	FALSE	-0.669762	FALSE	0.692122	FALSE	1.86965	FALSE	-2.05818	FALSE	-0.270147	FALSE
chr1	17539502	17539561	chr1:17539502-17539561	1.97547	-3.00919	FALSE	-0.839036	FALSE	-1.85007	FALSE	0.324743	FALSE	-2.41713	FALSE	0.38624	FALSE
chr1	17540537	17540615	chr1:17540537-17540615	3.8531	-2.09537	FALSE	-0.186224	FALSE	-2.35443	FALSE	-0.511219	FALSE	-2.60049	FALSE	-1.13679	FALSE
chr1	17594791	17594887	chr1:17594791-17594887	7.02758	0.368469	FALSE	0.369375	FALSE	2.91527	Up	1.99663	Up	0.552953	FALSE	-0.0263933	FALSE
chr1	17596833	17596996	chr1:17596833-17596996	8.10583	-0.884229	FALSE	-0.104789	FALSE	2.16473	Up	-0.327715	FALSE	-0.264678	FALSE	0.382258	FALSE
chr1	17616986	17617076	chr1:17616986-17617076	3.76729	-1.12502	FALSE	0.7022	FALSE	1.4944	FALSE	1.52263	FALSE	0.628466	FALSE	1.10862	FALSE
chr1	17646013	17646133	chr1:17646013-17646133	2.70442	1.26457	FALSE	1.01688	FALSE	-0.771345	FALSE	-2.45236	FALSE	-1.44628	FALSE	0.154972	FALSE
chr1	18050620	18050661	chr1:18050620-18050661	2.50586	-0.550403	FALSE	-0.351053	FALSE	1.9291	FALSE	0.983418	FALSE	-0.166252	FALSE	-1.64016	FALSE
chr1	18192662	18192946	chr1:18192662-18192946	7.36053	-2.32648	FALSE	-0.615871	FALSE	0.938051	FALSE	0.668273	FALSE	0.0947273	FALSE	0.911107	FALSE
chr1	18193181	18193200	chr1:18193181-18193200	3.33275	-2.36463	FALSE	0.055283	FALSE	1.14206	FALSE	0.909849	FALSE	-0.225469	FALSE	2.74224	Up
chr1	18223611	18223893	chr1:18223611-18223893	22.9218	0.348655	FALSE	-0.0293948	FALSE	1.03819	FALSE	0.600998	FALSE	-0.23934	FALSE	0.707691	FALSE
chr1	18246256	18246484	chr1:18246256-18246484	20.6055	-0.769132	FALSE	-0.238636	FALSE	0.214447	FALSE	0.868448	FALSE	-0.715925	FALSE	0.542336	FALSE
chr1	18624630	18624696	chr1:18624630-18624696	9.75068	-1.00826	FALSE	-0.595218	FALSE	-0.28069	FALSE	-0.261418	FALSE	-0.384672	FALSE	0.404756	FALSE
chr1	18624909	18625027	chr1:18624909-18625027	31.0362	0.073023	FALSE	-0.531974	FALSE	-0.139459	FALSE	-0.224162	FALSE	-0.227689	FALSE	0.36902	FALSE
chr1	18658766	18658782	chr1:18658766-18658782	5.78832	-0.881395	FALSE	0.248079	FALSE	0.583822	FALSE	0.0840526	FALSE	-0.0501044	FALSE	-0.357907	FALSE
chr1	18659041	18659185	chr1:18659041-18659185	4.56307	0.670652	FALSE	0.164011	FALSE	0.409226	FALSE	0.826774	FALSE	-1.05414	FALSE	0.0139641	FALSE
chr1	18685354	18685456	chr1:18685354-18685456	3.65294	-1.10896	FALSE	0.980052	FALSE	0.631954	FALSE	-0.768744	FALSE	0.318949	FALSE	-0.209649	FALSE
chr1	18692178	18692201	chr1:18692178-18692201	1.87074	1.20259	FALSE	0.252186	FALSE	-1.04913	FALSE	-0.976185	FALSE	-1.16887	FALSE	0.29737	FALSE
chr1	18696215	18696233	chr1:18696215-18696233	7.69669	0.986321	FALSE	-1.3298	FALSE	0.350786	FALSE	0.00226227	FALSE	-0.229197	FALSE	0.793385	FALSE
chr1	18696453	18696556	chr1:18696453-18696556	26.7928	0.73476	FALSE	-0.651837	FALSE	0.387235	FALSE	0.344863	FALSE	-0.656478	FALSE	0.61621	FALSE
chr1	18726261	18726340	chr1:18726261-18726340	2.06567	0	FALSE	-0.902413	FALSE	-1.23501	FALSE	-2.18591	FALSE	-1.51169	FALSE	-1.91356	FALSE
chr1	18746080	18746118	chr1:18746080-18746118	2.83827	-0.662172	FALSE	-2.19941	FALSE	-0.205887	FALSE	-0.775252	FALSE	-0.710352	FALSE	1.07048	FALSE
chr1	18793767	18793855	chr1:18793767-18793855	5.31231	-0.240967	FALSE	-0.0742752	FALSE	0.225364	FALSE	-1.07088	FALSE	-1.00302	FALSE	0.0488641	FALSE
chr1	18846071	18846208	chr1:18846071-18846208	44.7811	0.339884	FALSE	-0.28116	FALSE	-0.618284	FALSE	-0.697404	FALSE	0.140168	FALSE	0.167934	FALSE
chr1	18961649	18961650	chr1:18961649-18961650	3.26516	0.347595	FALSE	-0.275283	FALSE	0.986507	FALSE	-0.605177	FALSE	1.1053	FALSE	0.143571	FALSE
chr1	19097002	19097097	chr1:19097002-19097097	10.738	0.437707	FALSE	-0.910772	FALSE	-0.0756519	FALSE	1.39766	Up	-0.577709	FALSE	-0.485653	FALSE
chr1	19171363	19171460	chr1:19171363-19171460	5.71052	0.20649	FALSE	0.838038	FALSE	5.14944	Up	2.14481	FALSE	-0.508762	FALSE	0.525558	FALSE
chr1	19233858	19234033	chr1:19233858-19234033	8.96579	-3.83527	FALSE	-0.572856	FALSE	0.123347	FALSE	0.500881	FALSE	0.464723	FALSE	-0.106825	FALSE
chr1	19236778	19236883	chr1:19236778-19236883	5.22511	0.796629	FALSE	-0.84537	FALSE	0.950121	FALSE	1.11629	FALSE	0.274681	FALSE	0.439065	FALSE
chr1	19241560	19241603	chr1:19241560-19241603	3.69695	-0.362657	FALSE	0.412774	FALSE	0.939827	FALSE	-0.255193	FALSE	-1.32867	FALSE	-0.805738	FALSE
chr1	19255953	19256130	chr1:19255953-19256130	6.44298	0.923951	FALSE	2.55849	FALSE	2.01144	Up	2.3723	Up	-0.480999	FALSE	-0.551958	FALSE
chr1	19639536	19639692	chr1:19639536-19639692	3.52119	-0.230909	FALSE	-2.09446	FALSE	1.9144	FALSE	2.52012	Up	0.192264	FALSE	0.569151	FALSE
chr1	19968799	19968929	chr1:19968799-19968929	2.75373	2.03019	FALSE	-0.989106	FALSE	1.12927	FALSE	1.72534	FALSE	1.19701	FALSE	0.332665	FALSE
chr1	19970011	19970090	chr1:19970011-19970090	4.21683	-0.694305	FALSE	-1.53984	FALSE	2.86276	FALSE	1.66386	FALSE	-0.725648	FALSE	-0.810081	FALSE
chr1	19974078	19974241	chr1:19974078-19974241	12.2081	-0.432261	FALSE	-0.037121	FALSE	1.11867	FALSE	1.38866	Up	-0.427572	FALSE	1.06898	FALSE
chr1	19975473	19975700	chr1:19975473-19975700	20.2007	-0.204315	FALSE	-0.325465	FALSE	0.808225	FALSE	1.3769	Up	-1.02992	FALSE	0.326562	FALSE
chr1	20403101	20403504	chr1:20403101-20403504	11.4459	-0.578153	FALSE	-0.935651	FALSE	0.286987	FALSE	1.34021	Up	-1.4068	FALSE	0.167289	FALSE
chr1	20414925	20415012	chr1:20414925-20415012	7.17581	-0.672897	FALSE	-0.912619	FALSE	2.25112	Up	2.36254	Up	1.03929	FALSE	-0.149018	FALSE
chr1	20544695	20544819	chr1:20544695-20544819	5.30536	-0.235229	FALSE	-0.652314	FALSE	0.20007	FALSE	-0.469124	FALSE	0.908976	FALSE	-0.0282326	FALSE
chr1	20619560	20619604	chr1:20619560-20619604	4.02381	-0.142234	FALSE	0.808666	FALSE	1.4689	FALSE	2.21026	Up	0.0134235	FALSE	2.35517	FALSE
chr1	20623476	20623637	chr1:20623476-20623637	25.7753	0.107402	FALSE	-0.355902	FALSE	0.528269	FALSE	1.06257	FALSE	0.06318	FALSE	1.28805	FALSE
chr1	20668804	20668897	chr1:20668804-20668897	3.06628	-2.49114	FALSE	-3.05991	FALSE	-1.57734	FALSE	1.12105	FALSE	0.106777	FALSE	2.97219	Up
chr1	20700624	20700773	chr1:20700624-20700773	5.36016	-1.35259	FALSE	0.254874	FALSE	0.260802	FALSE	2.22139	FALSE	-0.00287469	FALSE	0.707569	FALSE
chr1	20744036	20744091	chr1:20744036-20744091	6.94866	0.800188	FALSE	1.30923	FALSE	0.49751	FALSE	4.0259	Up	-0.439279	FALSE	0.893161	FALSE
chr1	20760399	20760589	chr1:20760399-20760589	9.0797	0.429325	FALSE	1.98983	FALSE	-1.42816	FALSE	-1.16193	FALSE	-1.32567	FALSE	-4.48725	Down
chr1	20762442	20762528	chr1:20762442-20762528	5.92453	-0.495834	FALSE	0.180772	FALSE	-0.731537	FALSE	-0.87559	FALSE	-1.58265	FALSE	-0.0179413	FALSE
chr1	20767008	20767141	chr1:20767008-20767141	7.18415	0.0242748	FALSE	0.293508	FALSE	0.641369	FALSE	0.536545	FALSE	0.319576	FALSE	0.101631	FALSE
chr1	20767518	20767646	chr1:20767518-20767646	4.64523	0.772395	FALSE	-0.257767	FALSE	-0.192416	FALSE	1.03207	FALSE	-0.882625	FALSE	-0.171792	FALSE
chr1	20774065	20774275	chr1:20774065-20774275	18.5061	-0.677066	FALSE	-0.467046	FALSE	-0.34072	FALSE	-1.14603	Down	-0.808522	FALSE	-0.961036	FALSE
chr1	20774498	20774594	chr1:20774498-20774594	19.225	0.0962277	FALSE	-0.277642	FALSE	0.374937	FALSE	-0.507813	FALSE	-1.10892	FALSE	-0.995277	FALSE
chr1	20785423	20785506	chr1:20785423-20785506	5.35488	-2.16002	FALSE	-0.968241	FALSE	-1.42273	FALSE	-0.147355	FALSE	-0.526362	FALSE	1.01435	FALSE
chr1	20787176	20787368	chr1:20787176-20787368	7.01577	-1.46901	FALSE	-2.07798	FALSE	-2.0473	FALSE	-0.314223	FALSE	-0.57424	FALSE	-0.0152858	FALSE
chr1	20787685	20787773	chr1:20787685-20787773	3.25952	-0.260823	FALSE	-0.134716	FALSE	0.0658561	FALSE	-0.716785	FALSE	-1.1076	FALSE	0.110069	FALSE
chr1	20795341	20795416	chr1:20795341-20795416	9.39639	0.113504	FALSE	0.281619	FALSE	1.58955	FALSE	1.76818	FALSE	-1.21318	FALSE	-0.799512	FALSE
chr1	20797196	20797296	chr1:20797196-20797296	10.7057	-0.35441	FALSE	-0.383914	FALSE	0.374103	FALSE	0.987247	FALSE	0.547746	FALSE	0.387648	FALSE
chr1	20799411	20799609	chr1:20799411-20799609	13.0621	0.1484	FALSE	0.69157	FALSE	0.592447	FALSE	0.343003	FALSE	-0.314384	FALSE	-0.188162	FALSE
chr1	20820364	20820461	chr1:20820364-20820461	77.5421	0.424531	FALSE	-0.138514	FALSE	-0.106253	FALSE	-0.490056	FALSE	0.00825096	FALSE	0.0356954	FALSE
chr1	20832620	20832661	chr1:20832620-20832661	4.41194	0.634654	FALSE	-0.8031	FALSE	-0.0188708	FALSE	-0.860167	FALSE	1.40958	FALSE	1.28521	FALSE
chr1	20845081	20845274	chr1:20845081-20845274	10.4701	-0.286397	FALSE	-0.167287	FALSE	1.94854	Up	1.6374	Up	-1.42356	FALSE	-0.676444	FALSE
chr1	20848269	20848473	chr1:20848269-20848473	4.70819	1.36699	FALSE	0.900058	FALSE	0.0419279	FALSE	0.520353	FALSE	2.98876	FALSE	-1.13165	FALSE
chr1	20863877	20864031	chr1:20863877-20864031	12.1946	0.391463	FALSE	0.117181	FALSE	2.20287	Up	2.01434	Up	0.15289	FALSE	0.882526	FALSE
chr1	20864781	20864922	chr1:20864781-20864922	5.6058	-0.0938805	FALSE	0.837326	FALSE	0.789923	FALSE	1.93331	Up	0.326671	FALSE	1.05676	FALSE
chr1	20867557	20867606	chr1:20867557-20867606	1.62058	0.790225	FALSE	-4.03196	FALSE	-0.728882	FALSE	-4.70236	Down	-0.181206	FALSE	-0.898217	FALSE
chr1	20868857	20868932	chr1:20868857-20868932	4.10329	-0.671745	FALSE	-1.84145	FALSE	-2.17013	FALSE	-0.0369899	FALSE	-0.878331	FALSE	-0.326938	FALSE
chr1	20870997	20871154	chr1:20870997-20871154	4.86207	0.567964	FALSE	-0.489062	FALSE	0.494259	FALSE	1.94344	Up	-0.543372	FALSE	1.57217	FALSE
chr1	20879481	20879621	chr1:20879481-20879621	2.3297	0.199872	FALSE	0.183139	FALSE	2.23106	FALSE	-0.0986527	FALSE	0.847225	FALSE	-1.92299	FALSE
chr1	20880788	20880875	chr1:20880788-20880875	2.82151	3.13495	FALSE	1.40913	FALSE	2.55631	FALSE	0.979525	FALSE	1.1797	FALSE	2.00104	FALSE
chr1	20890461	20890623	chr1:20890461-20890623	10.543	-0.0711405	FALSE	-0.138534	FALSE	-0.450749	FALSE	1.04602	FALSE	0.0379422	FALSE	0.310122	FALSE
chr1	20896676	20896814	chr1:20896676-20896814	10.7565	0.155937	FALSE	0.153529	FALSE	2.42178	Up	0.683113	FALSE	1.2971	FALSE	0.704021	FALSE
chr1	20912707	20912889	chr1:20912707-20912889	5.62787	0.711872	FALSE	0.893951	FALSE	0.88416	FALSE	1.39857	FALSE	0.995341	FALSE	-1.23003	FALSE
chr1	20925602	20925698	chr1:20925602-20925698	6.56846	-0.480904	FALSE	-0.584856	FALSE	4.18114	Up	0.833157	FALSE	0.463141	FALSE	1.30468	FALSE
chr1	20951463	20951694	chr1:20951463-20951694	16.5852	1.43068	FALSE	-0.559673	FALSE	-0.255702	FALSE	-0.544176	FALSE	-0.149462	FALSE	-0.793457	FALSE
chr1	21014552	21014740	chr1:21014552-21014740	4.88698	-1.1587	FALSE	0.816922	FALSE	2.15856	FALSE	-0.252409	FALSE	0.0627425	FALSE	-1.09727	FALSE
chr1	21024046	21024147	chr1:21024046-21024147	5.30441	0.846712	FALSE	1.07989	FALSE	2.0851	FALSE	0.678179	FALSE	1.64832	FALSE	-0.309793	FALSE
chr1	21025830	21026220	chr1:21025830-21026220	2.6979	0.00820071	FALSE	2.68186	FALSE	-0.088202	FALSE	0.988369	FALSE	1.12861	FALSE	-0.892729	FALSE
chr1	21067632	21067794	chr1:21067632-21067794	2.94442	1.09613	FALSE	-2.86372	FALSE	0.73348	FALSE	-2.67196	FALSE	-0.901119	FALSE	-2.51277	FALSE
chr1	21073236	21073328	chr1:21073236-21073328	4.42357	-1.76676	FALSE	0.607653	FALSE	0.00751744	FALSE	-0.834713	FALSE	0.290921	FALSE	-0.361487	FALSE
chr1	21079162	21079748	chr1:21079162-21079748	9.57826	-1.18889	FALSE	0.078822	FALSE	-0.23828	FALSE	-0.142822	FALSE	0.329765	FALSE	0.419666	FALSE
chr1	21080530	21080627	chr1:21080530-21080627	10.2667	1.4976	FALSE	-0.972252	FALSE	-0.166972	FALSE	-0.691329	FALSE	-0.120756	FALSE	-0.148889	FALSE
chr1	21097076	21097244	chr1:21097076-21097244	10.753	-0.858903	FALSE	-0.843573	FALSE	-0.797213	FALSE	-0.941274	FALSE	-1.07783	FALSE	-1.22073	FALSE
chr1	21166376	21166989	chr1:21166376-21166989	15.8211	0.70967	FALSE	0.0478627	FALSE	0.644741	FALSE	0.680175	FALSE	-0.323302	FALSE	-0.0232421	FALSE
chr1	21175261	21175335	chr1:21175261-21175335	6.66623	0.10105	FALSE	-0.0613903	FALSE	1.61294	FALSE	0.98957	FALSE	-0.477518	FALSE	-0.0803377	FALSE
chr1	21191797	21191997	chr1:21191797-21191997	5.7699	1.79012	FALSE	-0.00108314	FALSE	-0.189024	FALSE	1.7887	Up	0.603674	FALSE	0.111346	FALSE
chr1	21204302	21204304	chr1:21204302-21204304	3.32846	0.840966	FALSE	0.802105	FALSE	0.671154	FALSE	0.633049	FALSE	0.873081	FALSE	1.52019	FALSE
chr1	21212737	21212865	chr1:21212737-21212865	2.8451	-0.127077	FALSE	-5.41172	FALSE	0.541751	FALSE	3.3041	FALSE	1.00572	FALSE	3.32484	FALSE
chr1	21218317	21218825	chr1:21218317-21218825	11.4568	-0.0569107	FALSE	0.127406	FALSE	-0.0397105	FALSE	-0.162395	FALSE	-0.397557	FALSE	0.010589	FALSE
chr1	21227748	21227853	chr1:21227748-21227853	9.04406	0.126296	FALSE	0.266374	FALSE	-1.01604	FALSE	0.190935	FALSE	0.555506	FALSE	0.906116	FALSE
chr1	21228058	21228089	chr1:21228058-21228089	4.57571	-1.16973	FALSE	-0.535831	FALSE	0.48545	FALSE	0.868995	FALSE	-0.0446087	FALSE	1.3561	FALSE
chr1	21228831	21229161	chr1:21228831-21229161	5.13382	0.0536619	FALSE	0.279848	FALSE	0.523517	FALSE	0.0450142	FALSE	-0.671834	FALSE	1.61376	FALSE
chr1	21238226	21238384	chr1:21238226-21238384	2.8087	-3.66817	FALSE	-1.02558	FALSE	0.674955	FALSE	1.7792	FALSE	2.12414	FALSE	2.01323	FALSE
chr1	21238689	21238713	chr1:21238689-21238713	3.64811	-0.159361	FALSE	-2.17461	FALSE	2.74633	FALSE	1.58409	FALSE	0.446228	FALSE	1.0321	FALSE
chr1	21247571	21247604	chr1:21247571-21247604	3.42426	-0.766024	FALSE	-0.588165	FALSE	-0.178495	FALSE	-2.52717	FALSE	-0.144537	FALSE	-2.30606	FALSE
chr1	21250687	21250733	chr1:21250687-21250733	13.3482	-1.73806	FALSE	-1.72042	FALSE	-1.3929	FALSE	-1.12115	FALSE	-0.546978	FALSE	-1.09496	FALSE
chr1	21252950	21253112	chr1:21252950-21253112	44.6792	0.246045	FALSE	0.0404106	FALSE	0.252237	FALSE	0.341149	FALSE	-0.249104	FALSE	0.657948	FALSE
chr1	21253897	21254086	chr1:21253897-21254086	66.7825	-0.207114	FALSE	-0.86697	FALSE	-0.197226	FALSE	-0.141158	FALSE	-0.221584	FALSE	0.12783	FALSE
chr1	21256496	21256674	chr1:21256496-21256674	66.7679	-1.33475	FALSE	-2.43405	Down	-2.05971	Down	-1.35177	Down	-0.414084	FALSE	-0.449298	FALSE
chr1	21257020	21257105	chr1:21257020-21257105	22.2184	-0.410644	FALSE	-2.11296	Down	-0.630537	FALSE	-0.659917	FALSE	-0.603317	FALSE	-0.450194	FALSE
chr1	21260174	21260246	chr1:21260174-21260246	9.93324	0.613966	FALSE	-1.24788	FALSE	-2.95854	Down	-3.14617	Down	-0.844581	FALSE	-1.94767	Down
chr1	21266380	21266464	chr1:21266380-21266464	2.61698	-0.27191	FALSE	-0.0356386	FALSE	-3.06754	FALSE	-3.89391	Down	-0.0437214	FALSE	-4.07674	Down
chr1	21266956	21267017	chr1:21266956-21267017	4.72019	-0.661888	FALSE	-0.70027	FALSE	-2.04678	FALSE	1.07465	FALSE	-1.53558	FALSE	0.0861096	FALSE
chr1	21271447	21271918	chr1:21271447-21271918	8.11492	0.429661	FALSE	-0.324948	FALSE	-0.301861	FALSE	-0.564057	FALSE	-0.866815	FALSE	1.25251	FALSE
chr1	21279520	21279522	chr1:21279520-21279522	2.0562	0.0366171	FALSE	2.50241	FALSE	0.110408	FALSE	-1.04516	FALSE	2.40078	FALSE	1.77937	FALSE
chr1	21280833	21280841	chr1:21280833-21280841	2.65277	0	FALSE	3.07218	FALSE	-0.667813	FALSE	-0.274013	FALSE	0.352732	FALSE	-0.448556	FALSE
chr1	21292804	21292885	chr1:21292804-21292885	3.76305	-0.385861	FALSE	-0.0226597	FALSE	1.73082	FALSE	-1.04445	FALSE	-1.66102	FALSE	0.0745383	FALSE
chr1	21304638	21304842	chr1:21304638-21304842	5.36892	0.0764161	FALSE	-0.266909	FALSE	0.0266193	FALSE	-0.555111	FALSE	1.18185	FALSE	0.00395106	FALSE
chr1	21307462	21307559	chr1:21307462-21307559	5.28622	-0.364347	FALSE	-1.0114	FALSE	0.815492	FALSE	0.837431	FALSE	-0.187513	FALSE	-0.210434	FALSE
chr1	21321626	21321932	chr1:21321626-21321932	7.73476	-0.818927	FALSE	-0.478329	FALSE	-0.918512	FALSE	-0.890417	FALSE	-0.230386	FALSE	-0.261271	FALSE
chr1	21327738	21327913	chr1:21327738-21327913	24.0671	-0.69778	FALSE	1.02032	FALSE	0.239984	FALSE	-0.265145	FALSE	-1.03573	FALSE	-0.234128	FALSE
chr1	21329292	21329387	chr1:21329292-21329387	47.5383	0.257363	FALSE	0.328089	FALSE	0.306347	FALSE	0.405474	FALSE	0.032218	FALSE	0.411355	FALSE
chr1	21332179	21332260	chr1:21332179-21332260	62.6621	-0.158382	FALSE	-0.478923	FALSE	-0.00425055	FALSE	-0.215516	FALSE	-0.478814	FALSE	0.572303	FALSE
chr1	21333728	21333810	chr1:21333728-21333810	57.2331	0.456627	FALSE	-0.0170191	FALSE	0.184655	FALSE	-0.108172	FALSE	-0.441783	FALSE	0.350061	FALSE
chr1	21336503	21336646	chr1:21336503-21336646	18.7855	-0.137122	FALSE	0.640145	FALSE	-0.877563	FALSE	0.717996	FALSE	0.470171	FALSE	0.736918	FALSE
chr1	21344441	21344585	chr1:21344441-21344585	19.4623	-0.829191	FALSE	-0.695473	FALSE	-0.118897	FALSE	0.190119	FALSE	-0.440475	FALSE	0.218545	FALSE
chr1	21344877	21345047	chr1:21344877-21345047	48.2824	-0.361736	FALSE	-0.295876	FALSE	-0.103719	FALSE	0.00212655	FALSE	-0.658362	FALSE	0.389333	FALSE
chr1	21345518	21345756	chr1:21345518-21345756	45.7581	0.499572	FALSE	0.0909303	FALSE	0.74126	Up	0.668777	Up	-0.131907	FALSE	0.884428	Up
chr1	21351265	21351517	chr1:21351265-21351517	29.3654	-0.74811	FALSE	0.120629	FALSE	0.0402926	FALSE	0.114641	FALSE	-0.688434	FALSE	-0.131732	FALSE
chr1	21354190	21354442	chr1:21354190-21354442	25.938	0.0697491	FALSE	0.231157	FALSE	-0.144398	FALSE	-0.469287	FALSE	-0.0218952	FALSE	0.490639	FALSE
chr1	21354818	21354904	chr1:21354818-21354904	16.7603	0.0929568	FALSE	-0.210718	FALSE	0.138941	FALSE	1.44866	Up	1.33474	FALSE	0.474933	FALSE
chr1	21365354	21365358	chr1:21365354-21365358	1.97372	-0.00751157	FALSE	-1.31035	FALSE	-0.230567	FALSE	-1.94936	FALSE	-1.70728	FALSE	0.766337	FALSE
chr1	21367188	21367206	chr1:21367188-21367206	3.59408	1.30421	FALSE	-0.0961255	FALSE	-0.129267	FALSE	1.70871	FALSE	-1.38641	FALSE	-1.389	FALSE
chr1	21368071	21368119	chr1:21368071-21368119	5.81261	0.7254	FALSE	-0.201863	FALSE	0.115951	FALSE	0.782946	FALSE	-1.39825	FALSE	-2.07808	FALSE
chr1	21369987	21370135	chr1:21369987-21370135	5.96332	-1.03921	FALSE	-1.29117	FALSE	-0.556139	FALSE	0.563789	FALSE	-0.445262	FALSE	0.0210694	FALSE
chr1	21371223	21371329	chr1:21371223-21371329	7.45326	-0.00825252	FALSE	0.662622	FALSE	0.131353	FALSE	-0.596869	FALSE	0.126841	FALSE	-0.91305	FALSE
chr1	21372844	21373116	chr1:21372844-21373116	6.19497	0.107103	FALSE	0.51479	FALSE	-0.100845	FALSE	-0.730217	FALSE	-0.197013	FALSE	-0.316305	FALSE
chr1	21373396	21373411	chr1:21373396-21373411	5.3271	-0.303528	FALSE	-0.0318707	FALSE	0.801389	FALSE	-0.630327	FALSE	-1.21531	FALSE	-0.0184149	FALSE
chr1	21381279	21381521	chr1:21381279-21381521	4.94333	-0.129762	FALSE	-0.810409	FALSE	-0.314982	FALSE	-2.44871	Down	-2.95079	FALSE	-2.90127	FALSE
chr1	21383792	21384176	chr1:21383792-21384176	11.3617	-0.35211	FALSE	-0.285225	FALSE	0.0059737	FALSE	1.35191	Up	0.035526	FALSE	-0.0689835	FALSE
chr1	21386760	21386763	chr1:21386760-21386763	3.47743	-0.0281061	FALSE	0.55377	FALSE	0.966224	FALSE	0.666011	FALSE	0.840212	FALSE	0.789796	FALSE
chr1	21393121	21393519	chr1:21393121-21393519	6.59969	-2.30306	FALSE	-0.400773	FALSE	-1.07305	FALSE	0.316605	FALSE	-2.27802	FALSE	-1.94482	FALSE
chr1	21399233	21399421	chr1:21399233-21399421	7.99409	-0.439737	FALSE	0.790449	FALSE	-1.20112	FALSE	-1.82812	Down	0.68087	FALSE	-1.83959	FALSE
chr1	21400037	21400233	chr1:21400037-21400233	12.2293	0.854305	FALSE	1.46683	FALSE	-1.50022	FALSE	-3.24486	Down	0.198987	FALSE	-0.32382	FALSE
chr1	21411296	21411411	chr1:21411296-21411411	5.40623	-0.206089	FALSE	0.35272	FALSE	1.06819	FALSE	-0.344183	FALSE	-0.497589	FALSE	0.110123	FALSE
chr1	21428299	21428698	chr1:21428299-21428698	5.50616	0.173348	FALSE	0.508586	FALSE	1.55814	FALSE	3.44784	Up	0.648893	FALSE	0.97611	FALSE
chr1	21435984	21436092	chr1:21435984-21436092	9.60242	-0.0460375	FALSE	0.439521	FALSE	1.76537	Up	3.77863	Up	1.53151	FALSE	0.396475	FALSE
chr1	21448908	21449061	chr1:21448908-21449061	9.17089	-0.376018	FALSE	1.84867	FALSE	2.51022	Up	2.0974	Up	0.856175	FALSE	1.89367	FALSE
chr1	21461044	21461279	chr1:21461044-21461279	6.97125	0.700467	FALSE	0.35575	FALSE	-0.354374	FALSE	-1.38762	FALSE	-1.39607	FALSE	-1.43832	FALSE
chr1	21522171	21522179	chr1:21522171-21522179	3.23051	-0.248884	FALSE	-0.41613	FALSE	-1.2646	FALSE	-0.197859	FALSE	-1.00876	FALSE	1.67804	FALSE
chr1	21941619	21941786	chr1:21941619-21941786	4.14842	-1.12326	FALSE	0.308613	FALSE	1.48789	FALSE	4.42183	Up	0.57009	FALSE	1.18829	FALSE
chr1	21952573	21952700	chr1:21952573-21952700	3.6511	-2.26733	FALSE	-0.744212	FALSE	0.11715	FALSE	2.00917	Up	-0.57599	FALSE	1.38101	FALSE
chr1	21961326	21961622	chr1:21961326-21961622	6.76561	0.82309	FALSE	-0.590139	FALSE	0.0261466	FALSE	-1.07094	FALSE	-0.876878	FALSE	0.188558	FALSE
chr1	21962372	21962402	chr1:21962372-21962402	4.33795	1.09757	FALSE	0.652302	FALSE	2.19398	FALSE	0.652709	FALSE	-0.904145	FALSE	0.284389	FALSE
chr1	21966236	21966374	chr1:21966236-21966374	20.4819	-0.0654972	FALSE	0.412968	FALSE	2.44934	Up	2.9798	Up	-0.956146	FALSE	1.13428	FALSE
chr1	22029022	22029218	chr1:22029022-22029218	2.93909	-0.413356	FALSE	-0.504914	FALSE	-3.0122	FALSE	0.073283	FALSE	0.382609	FALSE	1.49569	FALSE
chr1	22100848	22100931	chr1:22100848-22100931	10.1609	0.368249	FALSE	0.246582	FALSE	1.32957	FALSE	-0.319464	FALSE	0.974079	FALSE	-1.23475	FALSE
chr1	22129586	22129594	chr1:22129586-22129594	2.64548	0.484167	FALSE	0.483587	FALSE	1.34138	FALSE	0.263948	FALSE	0.0701857	FALSE	-1.87206	FALSE
chr1	22268263	22268389	chr1:22268263-22268389	6.22914	-1.8927	FALSE	0.0275443	FALSE	0.406337	FALSE	0.565486	FALSE	-0.499053	FALSE	0.0344161	FALSE
chr1	22269108	22269186	chr1:22269108-22269186	5.66344	0.558424	FALSE	-0.979695	FALSE	0.61663	FALSE	0.270665	FALSE	0.00441978	FALSE	0.448573	FALSE
chr1	22356399	22356414	chr1:22356399-22356414	3.29101	0.617761	FALSE	-0.027186	FALSE	-0.0751965	FALSE	0.813103	FALSE	-0.775612	FALSE	0.499212	FALSE
chr1	22358444	22358448	chr1:22358444-22358448	1.87097	3.30488	FALSE	1.09394	FALSE	0.264616	FALSE	-0.895954	FALSE	-0.868614	FALSE	-0.301758	FALSE
chr1	22363830	22363844	chr1:22363830-22363844	3.23851	-0.947503	FALSE	-1.48344	FALSE	-1.23432	FALSE	1.50325	FALSE	0.370272	FALSE	0.863019	FALSE
chr1	22366624	22366683	chr1:22366624-22366683	4.44004	0.0167666	FALSE	-2.91799	FALSE	-1.52572	FALSE	-0.205081	FALSE	-1.43344	FALSE	-0.619487	FALSE
chr1	22373355	22373373	chr1:22373355-22373373	2.76089	1.39728	FALSE	-0.41458	FALSE	-1.89797	FALSE	-0.496637	FALSE	-1.93563	FALSE	-2.81837	FALSE
chr1	22421339	22421423	chr1:22421339-22421423	8.06007	-0.937133	FALSE	-0.344718	FALSE	1.56083	FALSE	1.45633	Up	-1.41434	FALSE	0.715368	FALSE
chr1	22422239	22422341	chr1:22422239-22422341	15.0727	1.38736	FALSE	-0.884681	FALSE	0.118294	FALSE	0.99885	Up	-1.28131	FALSE	0.424815	FALSE
chr1	22466739	22466909	chr1:22466739-22466909	102.656	-0.138154	FALSE	-0.364259	FALSE	-0.249429	FALSE	-0.563544	FALSE	-1.31297	Down	-0.876911	Down
chr1	22533212	22533509	chr1:22533212-22533509	5.19028	-0.671929	FALSE	0.563926	FALSE	-0.364147	FALSE	-1.21214	FALSE	-0.752619	FALSE	0.278535	FALSE
chr1	22823003	22823134	chr1:22823003-22823134	4.73408	-2.03247	FALSE	-1.29077	FALSE	-2.7605	FALSE	-1.92016	FALSE	-2.22357	FALSE	-3.58284	FALSE
chr1	23109275	23109439	chr1:23109275-23109439	4.27825	-0.0179527	FALSE	-2.72154	FALSE	-2.90481	Down	-5.06313	Down	-1.00009	FALSE	-4.41316	Down
chr1	23178746	23178854	chr1:23178746-23178854	4.40084	-3.70795	FALSE	-0.328107	FALSE	0.535124	FALSE	0.201591	FALSE	0.0556175	FALSE	1.48696	FALSE
chr1	23190447	23190567	chr1:23190447-23190567	3.82461	-2.29737	FALSE	-1.08685	FALSE	0.00699019	FALSE	2.17525	FALSE	0.918771	FALSE	3.45168	Up
chr1	23190839	23190844	chr1:23190839-23190844	2.91051	-2.83231	FALSE	-2.04007	FALSE	0.656346	FALSE	2.72023	FALSE	0.928653	FALSE	3.02409	FALSE
chr1	23192378	23192405	chr1:23192378-23192405	3.95806	-0.0225285	FALSE	0.657918	FALSE	1.86011	FALSE	0.819713	FALSE	1.12161	FALSE	1.69235	FALSE
chr1	23228633	23228673	chr1:23228633-23228673	2.72917	-0.468377	FALSE	-0.555659	FALSE	-3.67751	FALSE	-2.71746	FALSE	0.168481	FALSE	0.364701	FALSE
chr1	23246204	23246569	chr1:23246204-23246569	40.3714	-0.325574	FALSE	-0.723191	FALSE	-1.29762	Down	-1.15218	FALSE	-0.20858	FALSE	0.865221	FALSE
chr1	23247199	23247200	chr1:23247199-23247200	8.34413	-0.444832	FALSE	-0.111673	FALSE	-1.65186	FALSE	-0.939183	FALSE	-0.205093	FALSE	0.602582	FALSE
chr1	23256037	23256312	chr1:23256037-23256312	66.6551	0.0541924	FALSE	-1.60275e-05	FALSE	-0.0691706	FALSE	-0.283831	FALSE	-0.0503386	FALSE	0.436113	FALSE
chr1	23271034	23271121	chr1:23271034-23271121	6.44185	-0.759444	FALSE	1.80964	FALSE	-0.747524	FALSE	0.501119	FALSE	-0.03384	FALSE	-0.554004	FALSE
chr1	23286853	23286917	chr1:23286853-23286917	3.0075	0.471392	FALSE	-1.55877	FALSE	-1.3341	FALSE	-3.10091	FALSE	2.06669	FALSE	1.48829	FALSE
chr1	23330641	23330652	chr1:23330641-23330652	2.05556	-3.28922	FALSE	-1.98484	FALSE	-1.549	FALSE	-1.6454	FALSE	-2.40044	FALSE	-1.0306	FALSE
chr1	23372899	23372906	chr1:23372899-23372906	2.63915	-1.12711	FALSE	-2.5089	FALSE	-2.15046	FALSE	-3.17102	FALSE	-0.649835	FALSE	-0.766519	FALSE
chr1	23383305	23383491	chr1:23383305-23383491	37.9243	-0.682979	FALSE	-0.313874	FALSE	-0.0911519	FALSE	0.29136	FALSE	0.0850786	FALSE	0.391427	FALSE
chr1	23390113	23390231	chr1:23390113-23390231	4.7767	-0.650662	FALSE	0.914248	FALSE	0.18218	FALSE	0.666787	FALSE	-0.46481	FALSE	-0.418961	FALSE
chr1	23394529	23394611	chr1:23394529-23394611	12.4654	0.500665	FALSE	0.324148	FALSE	0.663012	FALSE	0.903697	FALSE	-0.0553223	FALSE	-0.451384	FALSE
chr1	23395439	23395528	chr1:23395439-23395528	10.3408	0.799158	FALSE	-0.0808854	FALSE	0.723702	FALSE	0.0870377	FALSE	0.682226	FALSE	-1.28252	FALSE
chr1	23426548	23426619	chr1:23426548-23426619	3.23433	0.327135	FALSE	0.927619	FALSE	0.787296	FALSE	3.56287	Up	-0.174509	FALSE	2.19825	FALSE
chr1	23524616	23524706	chr1:23524616-23524706	3.06784	-0.894115	FALSE	1.02837	FALSE	-0.177085	FALSE	-0.445921	FALSE	-0.0622656	FALSE	1.75007	FALSE
chr1	23539737	23539843	chr1:23539737-23539843	4.71249	0.514812	FALSE	-0.145967	FALSE	-0.080666	FALSE	-1.48327	FALSE	0.445976	FALSE	-0.015216	FALSE
chr1	23576405	23576514	chr1:23576405-23576514	10.7795	0.699342	FALSE	-0.0628762	FALSE	-0.420259	FALSE	-2.35601	Down	-1.59796	FALSE	-1.2688	FALSE
chr1	23613992	23614132	chr1:23613992-23614132	26.807	0.409893	FALSE	0.357068	FALSE	0.944452	FALSE	0.464743	FALSE	-1.47009	FALSE	-0.0131602	FALSE
chr1	23661828	23661912	chr1:23661828-23661912	2.99861	0.826263	FALSE	-0.631094	FALSE	-0.374653	FALSE	1.66687	FALSE	-0.335211	FALSE	0.54733	FALSE
chr1	23662210	23662269	chr1:23662210-23662269	1.22951	1.66172	FALSE	-0.438262	FALSE	-2.05901	FALSE	0.985294	FALSE	-1.72388	FALSE	0	FALSE
chr1	23674282	23674565	chr1:23674282-23674565	4.1541	0.118309	FALSE	1.08142	FALSE	-0.239013	FALSE	0.431467	FALSE	-0.521299	FALSE	0.0866966	FALSE
chr1	23701770	23701874	chr1:23701770-23701874	2.57131	1.13495	FALSE	-0.0289209	FALSE	0.962767	FALSE	1.61564	FALSE	0.207836	FALSE	-0.905998	FALSE
chr1	23762887	23763035	chr1:23762887-23763035	19.7801	-0.57844	FALSE	-0.102784	FALSE	0.0274501	FALSE	-0.481217	FALSE	-0.0851274	FALSE	0.533919	FALSE
chr1	23763774	23763952	chr1:23763774-23763952	7.45155	0.237364	FALSE	-0.38237	FALSE	0.651674	FALSE	-0.470146	FALSE	0.114457	FALSE	0.22978	FALSE
chr1	23792928	23793036	chr1:23792928-23793036	6.33234	0.104963	FALSE	-0.500198	FALSE	0.218847	FALSE	-0.707981	FALSE	-0.44851	FALSE	1.36759	FALSE
chr1	23810086	23810160	chr1:23810086-23810160	5.30253	0.119277	FALSE	-0.311967	FALSE	0.832216	FALSE	1.68777	FALSE	-0.789524	FALSE	2.16164	FALSE
chr1	23826564	23826635	chr1:23826564-23826635	6.6363	-0.127774	FALSE	0.208912	FALSE	-1.21664	FALSE	-0.369744	FALSE	-0.700692	FALSE	0.349817	FALSE
chr1	23827261	23827332	chr1:23827261-23827332	10.7475	-0.153823	FALSE	-0.297478	FALSE	0.472466	FALSE	-1.10458	FALSE	-0.471454	FALSE	-0.381069	FALSE
chr1	23830249	23830364	chr1:23830249-23830364	10.9656	-0.644166	FALSE	-0.0850605	FALSE	-1.03199	FALSE	-0.431532	FALSE	-0.0583813	FALSE	-0.990769	FALSE
chr1	23835194	23835367	chr1:23835194-23835367	2.51084	0.340815	FALSE	0.914731	FALSE	0.92868	FALSE	-1.68556	FALSE	-0.636543	FALSE	-1.90228	FALSE
chr1	23836752	23836837	chr1:23836752-23836837	7.127	-0.857187	FALSE	-1.23057	FALSE	0.964383	FALSE	-0.469973	FALSE	-0.591415	FALSE	-0.151362	FALSE
chr1	23840537	23840601	chr1:23840537-23840601	5.85251	0.319741	FALSE	0.141595	FALSE	1.37335	FALSE	-1.43331	FALSE	-1.17884	FALSE	1.36496	FALSE
chr1	23870778	23871000	chr1:23870778-23871000	18.1234	-0.0904677	FALSE	0.451963	FALSE	0.0776392	FALSE	0.109676	FALSE	0.0529545	FALSE	0.528607	FALSE
chr1	23873313	23873420	chr1:23873313-23873420	9.86836	-0.787884	FALSE	0.969898	FALSE	0.0813353	FALSE	-0.820147	FALSE	-0.296452	FALSE	-1.47994	FALSE
chr1	23873625	23873803	chr1:23873625-23873803	25.0993	0.692958	FALSE	1.45635	FALSE	-0.79922	FALSE	-0.301275	FALSE	-0.143169	FALSE	-0.186059	FALSE
chr1	23876092	23876191	chr1:23876092-23876191	10.8271	-0.859441	FALSE	-0.303876	FALSE	-1.37648	FALSE	-0.361057	FALSE	0.732866	FALSE	-0.222823	FALSE
chr1	23885037	23885307	chr1:23885037-23885307	5.95248	0.103758	FALSE	-0.319252	FALSE	-3.19775	FALSE	-3.72077	Down	-0.455678	FALSE	-0.363354	FALSE
chr1	23892172	23892324	chr1:23892172-23892324	18.9798	0.120649	FALSE	-0.166268	FALSE	0.0287875	FALSE	0.0211812	FALSE	-0.292997	FALSE	-0.0424774	FALSE
chr1	23899202	23899381	chr1:23899202-23899381	9.13383	-1.30322	FALSE	0.0873238	FALSE	1.65469	FALSE	1.04319	FALSE	-1.01832	FALSE	0.9471	FALSE
chr1	23910567	23910622	chr1:23910567-23910622	6.14453	1.18185	FALSE	-0.691801	FALSE	-1.10381	FALSE	-0.346177	FALSE	0.144331	FALSE	0.68007	FALSE
chr1	23911079	23911143	chr1:23911079-23911143	2.64976	-2.83669	FALSE	1.5833	FALSE	-4.08631	Down	-3.69192	Down	0.0201138	FALSE	-0.444743	FALSE
chr1	23918007	23918053	chr1:23918007-23918053	4.85951	-0.62187	FALSE	-0.663314	FALSE	-0.881851	FALSE	-0.0200367	FALSE	-0.640835	FALSE	0.251705	FALSE
chr1	23918691	23918733	chr1:23918691-23918733	4.94026	-0.498773	FALSE	-0.366696	FALSE	-2.49379	FALSE	-1.21395	FALSE	-0.272939	FALSE	-1.53114	FALSE
chr1	23921736	23921806	chr1:23921736-23921806	19.772	-0.206014	FALSE	-0.0880229	FALSE	-0.0314695	FALSE	-0.52023	FALSE	0.200272	FALSE	0.928893	FALSE
chr1	23922344	23922533	chr1:23922344-23922533	15.8417	-0.0842244	FALSE	0.450955	FALSE	-0.379941	FALSE	0.0691339	FALSE	0.162167	FALSE	0.880322	FALSE
chr1	23923849	23923957	chr1:23923849-23923957	12.3697	-1.06143	FALSE	-0.724637	FALSE	-0.769895	FALSE	-0.43196	FALSE	-0.772969	FALSE	0.426183	FALSE
chr1	23926607	23926850	chr1:23926607-23926850	23.5753	0.0204014	FALSE	-0.585812	FALSE	-1.82003	Down	-0.267699	FALSE	-1.94391	Down	-1.04511	FALSE
chr1	23927749	23927760	chr1:23927749-23927760	9.07734	-0.419324	FALSE	-0.255603	FALSE	-0.471363	FALSE	-1.14274	FALSE	-0.544349	FALSE	-1.17828	FALSE
chr1	23928249	23928357	chr1:23928249-23928357	6.66702	-0.844491	FALSE	-0.703546	FALSE	0.921317	FALSE	1.20602	FALSE	-0.106036	FALSE	-0.827594	FALSE
chr1	23932412	23932552	chr1:23932412-23932552	4.97704	-0.820301	FALSE	-1.61599	FALSE	-0.455288	FALSE	0.494995	FALSE	-0.142821	FALSE	0.781255	FALSE
chr1	23934850	23935051	chr1:23934850-23935051	10.9279	-0.187075	FALSE	-1.40463	FALSE	-0.794872	FALSE	-2.02575	Down	-0.757551	FALSE	-1.58606	Down
chr1	23937283	23937363	chr1:23937283-23937363	9.20792	-0.53523	FALSE	-2.54988	FALSE	0.0432032	FALSE	-0.937538	FALSE	-0.741273	FALSE	0.410689	FALSE
chr1	23937966	23938177	chr1:23937966-23938177	19.9191	-0.91299	FALSE	-1.34233	FALSE	-1.17079	Down	-2.21275	Down	-0.966202	FALSE	-1.59987	Down
chr1	23938427	23938728	chr1:23938427-23938728	31.7697	-0.357886	FALSE	-0.13832	FALSE	-0.357037	FALSE	-0.579893	FALSE	-0.432108	FALSE	-0.654333	FALSE
chr1	23943880	23943890	chr1:23943880-23943890	3.19507	2.19218	FALSE	-0.305196	FALSE	-2.97136	FALSE	-3.54155	Down	0.56605	FALSE	-0.338953	FALSE
chr1	23944450	23944600	chr1:23944450-23944600	14.6837	0.160384	FALSE	0.560956	FALSE	0.507877	FALSE	-0.164082	FALSE	0.0366142	FALSE	0.423701	FALSE
chr1	23945490	23945577	chr1:23945490-23945577	3.95717	-1.06302	FALSE	-0.420659	FALSE	0.600218	FALSE	-1.60472	FALSE	-1.14092	FALSE	-0.183877	FALSE
chr1	23949455	23949507	chr1:23949455-23949507	5.02204	0.281852	FALSE	0.785401	FALSE	-0.868093	FALSE	-2.27149	Down	0.196285	FALSE	-0.850359	FALSE
chr1	23965173	23965197	chr1:23965173-23965197	6.83142	-1.94304	FALSE	0.156219	FALSE	0.989302	FALSE	-0.151906	FALSE	0.528853	FALSE	-0.993293	FALSE
chr1	23966319	23966450	chr1:23966319-23966450	64.3858	0.0677414	FALSE	-0.0301574	FALSE	0.303483	FALSE	0.479387	FALSE	-0.305888	FALSE	0.00723426	FALSE
chr1	23966663	23966726	chr1:23966663-23966726	10.8255	0.0969525	FALSE	0.0775556	FALSE	0.531644	FALSE	-0.0328548	FALSE	-0.625435	FALSE	-0.306228	FALSE
chr1	23968525	23968581	chr1:23968525-23968581	9.94082	0.832963	FALSE	0.429176	FALSE	-1.21694	FALSE	-0.477554	FALSE	0.144667	FALSE	-0.504052	FALSE
chr1	23971272	23971288	chr1:23971272-23971288	2.93073	0.811799	FALSE	0.258495	FALSE	-3.29482	FALSE	-2.87086	Down	-3.06401	FALSE	-2.80832	Down
chr1	23993639	23993644	chr1:23993639-23993644	1.74246	1.05405	FALSE	1.99358	FALSE	-0.330537	FALSE	1.62554	FALSE	-1.49028	FALSE	0.161585	FALSE
chr1	23994080	23994421	chr1:23994080-23994421	3.53734	0.258172	FALSE	-0.0556107	FALSE	1.28436	FALSE	0.523642	FALSE	-0.395777	FALSE	-0.426438	FALSE
chr1	24001636	24001637	chr1:24001636-24001637	2.35823	-0.782743	FALSE	-0.374999	FALSE	0.00189613	FALSE	-2.50547	FALSE	-0.0986741	FALSE	0.588421	FALSE
chr1	24005642	24005781	chr1:24005642-24005781	15.0315	-0.474066	FALSE	0.0850699	FALSE	0.292215	FALSE	-0.074782	FALSE	0.122643	FALSE	0.30103	FALSE
chr1	24060850	24060860	chr1:24060850-24060860	1.26274	-1.74248	FALSE	-0.547472	FALSE	-0.473382	FALSE	-0.00579381	FALSE	1.87123	FALSE	-0.00938387	FALSE
chr1	24076328	24076393	chr1:24076328-24076393	3.37483	0.835235	FALSE	-0.637036	FALSE	-0.436466	FALSE	0.109664	FALSE	-0.67203	FALSE	0.192921	FALSE
chr1	24092900	24093201	chr1:24092900-24093201	4.69117	-0.525335	FALSE	-3.73486	FALSE	-4.2075	Down	-3.41323	Down	-1.2072	FALSE	-1.94017	FALSE
chr1	24099902	24099984	chr1:24099902-24099984	4.82209	-3.77355	FALSE	-0.29098	FALSE	-0.616692	FALSE	-0.572588	FALSE	0.0157592	FALSE	-0.703308	FALSE
chr1	24100188	24100528	chr1:24100188-24100528	16.6467	-0.458443	FALSE	-0.0231614	FALSE	0.0410255	FALSE	-0.190332	FALSE	0.156015	FALSE	0.180921	FALSE
chr1	24108116	24108212	chr1:24108116-24108212	5.18509	-0.478334	FALSE	-1.04118	FALSE	-0.056412	FALSE	1.0632	FALSE	-1.29477	FALSE	0.857577	FALSE
chr1	24112233	24112388	chr1:24112233-24112388	8.44638	-0.631666	FALSE	-0.248281	FALSE	0.789083	FALSE	1.02318	FALSE	0.144089	FALSE	0.292311	FALSE
chr1	24302847	24302930	chr1:24302847-24302930	4.08143	-0.619399	FALSE	0.227655	FALSE	0.246797	FALSE	0.422276	FALSE	1.06645	FALSE	-1.1522	FALSE
chr1	24318506	24318507	chr1:24318506-24318507	2.21856	-1.00912	FALSE	0.0967504	FALSE	0.845256	FALSE	0.622579	FALSE	-0.279138	FALSE	0.549964	FALSE
chr1	24337747	24337751	chr1:24337747-24337751	2.20593	2.15793	FALSE	1.50752	FALSE	0.91558	FALSE	-0.61854	FALSE	0.221056	FALSE	-1.64954	FALSE
chr1	24376395	24376451	chr1:24376395-24376451	3.74324	2.50294	FALSE	0.277033	FALSE	1.05324	FALSE	0.396924	FALSE	-0.269501	FALSE	-1.89981	FALSE
chr1	24385953	24386076	chr1:24385953-24386076	2.88516	0.133247	FALSE	-3.61642	FALSE	-0.834299	FALSE	-0.417455	FALSE	-2.08794	FALSE	-1.99081	FALSE
chr1	24553648	24553795	chr1:24553648-24553795	4.27694	1.19868	FALSE	-0.439701	FALSE	0.902633	FALSE	0.908101	FALSE	0.0367905	FALSE	1.53547	FALSE
chr1	24634954	24634979	chr1:24634954-24634979	2.5151	-0.701712	FALSE	0.377416	FALSE	-1.38621	FALSE	2.30103	FALSE	-0.0377918	FALSE	-1.3843	FALSE
chr1	24660610	24660680	chr1:24660610-24660680	2.13254	0.968049	FALSE	0.653283	FALSE	1.49809	FALSE	-0.401709	FALSE	1.67318	FALSE	0.351645	FALSE
chr1	24663837	24664008	chr1:24663837-24664008	3.18377	-1.01647	FALSE	0.52539	FALSE	2.52618	FALSE	-0.522055	FALSE	1.92489	FALSE	0.865201	FALSE
chr1	24677803	24677805	chr1:24677803-24677805	6.25318	-1.51473	FALSE	-1.29833	FALSE	-2.49326	FALSE	-2.19246	Down	0.0354067	FALSE	0.297091	FALSE
chr1	24678479	24678868	chr1:24678479-24678868	25.0546	-0.551485	FALSE	-0.142363	FALSE	0.353715	FALSE	-0.0853267	FALSE	0.00570746	FALSE	0.295775	FALSE
chr1	24680534	24680578	chr1:24680534-24680578	8.69406	0.464432	FALSE	0.145229	FALSE	-0.532727	FALSE	0.0438513	FALSE	-0.513413	FALSE	0.0898716	FALSE
chr1	24699492	24699615	chr1:24699492-24699615	7.37198	-0.0460653	FALSE	-1.04391	FALSE	0.378339	FALSE	-0.41318	FALSE	0.128095	FALSE	-0.676152	FALSE
chr1	24701404	24701480	chr1:24701404-24701480	4.9415	1.80903	FALSE	-0.855702	FALSE	-1.72716	FALSE	-1.35669	FALSE	-1.04309	FALSE	-0.270399	FALSE
chr1	24708375	24708464	chr1:24708375-24708464	4.17583	0.067227	FALSE	0.658681	FALSE	1.67218	FALSE	1.15173	FALSE	0.995601	FALSE	1.47001	FALSE
chr1	24717009	24717059	chr1:24717009-24717059	2.74767	0.211472	FALSE	0.752636	FALSE	-0.74329	FALSE	-1.45307	FALSE	0.298699	FALSE	-1.88057	FALSE
chr1	24732826	24732953	chr1:24732826-24732953	21.467	-0.181859	FALSE	0.225514	FALSE	0.638044	FALSE	0.313254	FALSE	-0.658885	FALSE	-0.0993553	FALSE
chr1	24733441	24733575	chr1:24733441-24733575	6.9934	-1.5412	FALSE	-0.206614	FALSE	1.17506	FALSE	0.11723	FALSE	-0.490895	FALSE	0.439137	FALSE
chr1	24741062	24741132	chr1:24741062-24741132	4.50511	0.868968	FALSE	0.215363	FALSE	-2.15732	FALSE	-0.47509	FALSE	-1.23396	FALSE	-1.36116	FALSE
chr1	24760758	24760906	chr1:24760758-24760906	6.45718	0.313385	FALSE	0.654467	FALSE	-0.511705	FALSE	-2.67711	FALSE	-1.77322	FALSE	-1.49441	FALSE
chr1	24765747	24765997	chr1:24765747-24765997	7.74234	-0.114266	FALSE	0.212109	FALSE	0.259865	FALSE	-0.985387	FALSE	-1.00806	FALSE	-1.85493	FALSE
chr1	24769464	24769642	chr1:24769464-24769642	33.4476	-0.0761733	FALSE	-0.183757	FALSE	0.228552	FALSE	-0.136145	FALSE	-2.10108	Down	-0.572228	FALSE
chr1	24770141	24770347	chr1:24770141-24770347	25.0066	-0.0103318	FALSE	0.454136	FALSE	-0.414033	FALSE	-0.466286	FALSE	-2.22938	Down	-1.76293	Down
chr1	24775301	24775388	chr1:24775301-24775388	5.7473	0.830243	FALSE	-0.20643	FALSE	-0.5775	FALSE	1.25826	FALSE	-0.898711	FALSE	-0.422042	FALSE
chr1	24776650	24776840	chr1:24776650-24776840	47.7716	0.152596	FALSE	0.688449	FALSE	-0.0785797	FALSE	-0.630795	FALSE	-1.37807	Down	-1.82698	Down
chr1	24783047	24783246	chr1:24783047-24783246	7.91223	-0.78806	FALSE	-1.15673	FALSE	-1.03577	FALSE	-2.52304	Down	-1.55134	FALSE	-1.18748	FALSE
chr1	24783689	24783845	chr1:24783689-24783845	8.63119	0.351903	FALSE	0.567651	FALSE	-0.539987	FALSE	-1.0736	FALSE	-2.24973	FALSE	-1.51463	FALSE
chr1	24784908	24785433	chr1:24784908-24785433	9.94501	0.522397	FALSE	0.314833	FALSE	1.06235	FALSE	0.0965011	FALSE	-2.47005	FALSE	-0.546809	FALSE
chr1	24901463	24901473	chr1:24901463-24901473	2.43851	-1.87763	FALSE	1.03581	FALSE	0.242143	FALSE	-0.963694	FALSE	1.3353	FALSE	2.11219	FALSE
chr1	25020473	25020692	chr1:25020473-25020692	16.8499	-0.0833137	FALSE	0.803232	FALSE	0.806321	FALSE	0.674313	FALSE	0.379553	FALSE	0.22217	FALSE
chr1	25023396	25023503	chr1:25023396-25023503	7.38893	0.487	FALSE	2.39331	FALSE	1.2297	FALSE	2.45628	FALSE	0.92581	FALSE	0.851805	FALSE
chr1	25049690	25049898	chr1:25049690-25049898	12.2202	0.377665	FALSE	0.443512	FALSE	0.479131	FALSE	1.08434	FALSE	0.35031	FALSE	0.174628	FALSE
chr1	25061980	25062113	chr1:25061980-25062113	7.299	0.241936	FALSE	0.380455	FALSE	0.287278	FALSE	1.41013	FALSE	0.958705	FALSE	-0.0848733	FALSE
chr1	25064085	25064204	chr1:25064085-25064204	11.3722	0.462809	FALSE	0.926779	FALSE	1.52161	FALSE	1.11622	FALSE	0.347028	FALSE	-0.204598	FALSE
chr1	25064462	25064464	chr1:25064462-25064464	3.64629	0.39732	FALSE	0.924159	FALSE	0.753165	FALSE	0.858605	FALSE	0.654058	FALSE	0.308252	FALSE
chr1	25070132	25070267	chr1:25070132-25070267	5.26581	-1.58096	FALSE	1.12767	FALSE	-1.05291	FALSE	0.944909	FALSE	-0.229669	FALSE	0.96112	FALSE
chr1	25132601	25132712	chr1:25132601-25132712	6.10292	-1.14339	FALSE	0.594507	FALSE	1.069	FALSE	1.09422	FALSE	0.400613	FALSE	1.23509	FALSE
chr1	25133100	25133237	chr1:25133100-25133237	6.02352	-0.591412	FALSE	-0.734605	FALSE	1.03062	FALSE	2.30854	FALSE	-0.103729	FALSE	0.91311	FALSE
chr1	25181959	25182143	chr1:25181959-25182143	2.98475	0	FALSE	-0.651899	FALSE	-4.97935	Down	-4.13289	Down	-4.33756	Down	-4.33952	Down
chr1	25530840	25531014	chr1:25530840-25531014	3.85176	0.843119	FALSE	1.15419	FALSE	0.962546	FALSE	-0.488865	FALSE	0.76118	FALSE	0.368826	FALSE
chr1	25830582	25830686	chr1:25830582-25830686	6.99462	-0.410258	FALSE	-1.29092	FALSE	-0.0528933	FALSE	-1.43888	FALSE	0.0945461	FALSE	0.0883065	FALSE
chr1	25888137	25888226	chr1:25888137-25888226	9.42934	0.479117	FALSE	0.956236	FALSE	-1.73584	FALSE	-2.55185	Down	0.18272	FALSE	-4.53978	Down
chr1	25970832	25970886	chr1:25970832-25970886	2.18676	-0.903374	FALSE	0.473797	FALSE	1.03206	FALSE	0.284234	FALSE	-0.382581	FALSE	1.19692	FALSE
chr1	26321098	26321303	chr1:26321098-26321303	7.59065	0.685984	FALSE	1.32287	FALSE	0.212456	FALSE	-0.723572	FALSE	-1.47594	FALSE	-1.75027	FALSE
chr1	26339999	26340143	chr1:26339999-26340143	18.7688	0.812944	FALSE	0.903618	FALSE	-1.51791	FALSE	-2.78968	Down	-2.93933	Down	-5.70232	Down
chr1	26340647	26340765	chr1:26340647-26340765	8.62467	-0.985715	FALSE	-2.21535	FALSE	-3.70608	Down	-4.44205	Down	-4.73289	Down	-3.35273	Down
chr1	26524653	26524706	chr1:26524653-26524706	3.5151	1.15758	FALSE	-0.0838312	FALSE	-0.777994	FALSE	-0.691016	FALSE	-0.754079	FALSE	-0.207552	FALSE
chr1	26687027	26687612	chr1:26687027-26687612	7.36197	-2.36059	FALSE	0.174429	FALSE	0.066911	FALSE	-1.71424	FALSE	-0.210944	FALSE	-0.0616116	FALSE
chr1	26688092	26688096	chr1:26688092-26688096	5.51823	0.238044	FALSE	-1.05098	FALSE	-0.623656	FALSE	-0.704531	FALSE	-0.296796	FALSE	-0.0433666	FALSE
chr1	26739904	26740239	chr1:26739904-26740239	69.2347	0.51945	FALSE	0.0448801	FALSE	0.0946917	FALSE	-0.247607	FALSE	-0.317561	FALSE	0.260219	FALSE
chr1	26740499	26740640	chr1:26740499-26740640	21.8261	2.50967	FALSE	-0.192926	FALSE	-0.229252	FALSE	-0.748358	FALSE	-0.226893	FALSE	0.13717	FALSE
chr1	26863390	26863644	chr1:26863390-26863644	9.68962	0.573757	FALSE	0.389003	FALSE	0.516009	FALSE	0.47295	FALSE	-0.720854	FALSE	0.0320065	FALSE
chr1	26875725	26876042	chr1:26875725-26876042	7.06777	-0.774561	FALSE	-1.20908	FALSE	0.0614816	FALSE	1.32945	FALSE	-0.00540269	FALSE	1.45986	FALSE
chr1	26891619	26891783	chr1:26891619-26891783	26.0428	0.397851	FALSE	0.496142	FALSE	0.224088	FALSE	-0.474656	FALSE	-0.268643	FALSE	0.0718617	FALSE
chr1	26948343	26948353	chr1:26948343-26948353	2.8966	-0.638833	FALSE	0.189491	FALSE	2.00663	FALSE	-0.341956	FALSE	0.209469	FALSE	1.14425	FALSE
chr1	26974481	26974489	chr1:26974481-26974489	2.69911	-2.48494	FALSE	-2.10645	FALSE	1.30046	FALSE	-1.06479	FALSE	0.789948	FALSE	2.27696	FALSE
chr1	27486822	27486947	chr1:27486822-27486947	7.37389	0.959536	FALSE	-2.38562	FALSE	-3.20044	Down	-4.71683	Down	-1.99901	Down	-2.49093	Down
chr1	27599418	27599513	chr1:27599418-27599513	3.17389	-0.200537	FALSE	-0.161055	FALSE	0.927476	FALSE	1.23352	FALSE	0.377817	FALSE	1.31505	FALSE
chr1	27662400	27662480	chr1:27662400-27662480	4.20583	-2.12283	FALSE	-1.82041	FALSE	0.0355356	FALSE	1.71034	FALSE	-0.468808	FALSE	0.272309	FALSE
chr1	27715492	27715537	chr1:27715492-27715537	3.5195	0.224186	FALSE	1.06134	FALSE	-2.15532	FALSE	0.770198	FALSE	0.127467	FALSE	-0.788348	FALSE
chr1	27768934	27768995	chr1:27768934-27768995	1.55792	0.525324	FALSE	-0.0708719	FALSE	-0.356519	FALSE	1.81941	FALSE	0.441623	FALSE	0	FALSE
chr1	27797261	27797471	chr1:27797261-27797471	2.9347	0.696248	FALSE	1.32296	FALSE	2.58941	FALSE	0.725562	FALSE	-0.103607	FALSE	2.19079	FALSE
chr1	28059051	28059145	chr1:28059051-28059145	7.58269	-0.518229	FALSE	-0.883449	FALSE	-0.192812	FALSE	-0.376834	FALSE	-0.868084	FALSE	0.889713	FALSE
chr1	28321081	28321139	chr1:28321081-28321139	4.37315	0.937914	FALSE	0.321478	FALSE	-1.5568	FALSE	-0.803783	FALSE	-0.832624	FALSE	-3.94292	Down
chr1	28339655	28339765	chr1:28339655-28339765	4.85837	-0.901094	FALSE	-0.63487	FALSE	-1.49918	FALSE	0.677283	FALSE	-0.688701	FALSE	-1.42419	FALSE
chr1	28388263	28388312	chr1:28388263-28388312	3.62801	0.813734	FALSE	0.348183	FALSE	-0.959646	FALSE	-1.33421	FALSE	-0.242562	FALSE	-1.58822	FALSE
chr1	28394683	28394736	chr1:28394683-28394736	3.69535	0.271444	FALSE	-2.21995	FALSE	-1.31101	FALSE	-3.92334	Down	-0.665626	FALSE	0.0278098	FALSE
chr1	28394945	28395170	chr1:28394945-28395170	5.48318	1.00532	FALSE	-3.44891	FALSE	-1.72104	FALSE	-3.54566	Down	-1.24635	FALSE	-0.230095	FALSE
chr1	28464213	28464427	chr1:28464213-28464427	8.08652	0.816282	FALSE	0.022619	FALSE	1.16821	FALSE	1.2235	FALSE	0.166206	FALSE	0.993366	FALSE
chr1	28465225	28465352	chr1:28465225-28465352	14.2604	0.452501	FALSE	-0.0267532	FALSE	0.909096	FALSE	1.53269	Up	-0.0618296	FALSE	0.506157	FALSE
chr1	28601181	28601242	chr1:28601181-28601242	5.54623	2.25141	FALSE	1.18319	FALSE	1.08923	FALSE	0.555582	FALSE	-0.111343	FALSE	-0.112415	FALSE
chr1	28611402	28611609	chr1:28611402-28611609	31.5967	-0.254418	FALSE	0.29089	FALSE	0.2198	FALSE	-0.0623328	FALSE	-0.622271	FALSE	-0.385825	FALSE
chr1	28649227	28649431	chr1:28649227-28649431	5.26407	0.362428	FALSE	-3.53178	FALSE	0.979325	FALSE	0.787011	FALSE	-0.808412	FALSE	1.24155	FALSE
chr1	28652806	28652926	chr1:28652806-28652926	4.61646	1.63012	FALSE	-0.312029	FALSE	2.83741	Up	-0.582658	FALSE	-1.19418	FALSE	3.34139	FALSE
chr1	28675409	28675550	chr1:28675409-28675550	12.2506	-0.101109	FALSE	-0.375559	FALSE	1.43953	FALSE	1.91813	Up	0.978772	FALSE	1.13837	FALSE
chr1	28780292	28780360	chr1:28780292-28780360	3.46411	0.715889	FALSE	0.129979	FALSE	0.274698	FALSE	0.86368	FALSE	-1.53783	FALSE	1.33848	FALSE
chr1	29033993	29034113	chr1:29033993-29034113	3.28346	-1.12746	FALSE	-2.94616	FALSE	0.313776	FALSE	1.82288	FALSE	-1.51732	FALSE	0.969245	FALSE
chr1	29035997	29036495	chr1:29035997-29036495	17.3518	0.170955	FALSE	0.493268	FALSE	0.888941	FALSE	0.950691	FALSE	-1.18349	FALSE	0.0456718	FALSE
chr1	29037520	29037558	chr1:29037520-29037558	8.71822	1.46358	FALSE	-0.0745472	FALSE	0.930617	FALSE	1.15193	FALSE	-0.746673	FALSE	0.399805	FALSE
chr1	29137204	29137376	chr1:29137204-29137376	13.5524	0.452173	FALSE	0.96137	FALSE	-0.401611	FALSE	0.670546	FALSE	-0.582618	FALSE	-0.00243374	FALSE
chr1	29180462	29180631	chr1:29180462-29180631	3.19092	-0.810456	FALSE	-0.0202353	FALSE	1.29137	FALSE	1.80827	FALSE	-0.694764	FALSE	0.271815	FALSE
chr1	29442686	29442831	chr1:29442686-29442831	2.98004	-0.167503	FALSE	-0.432103	FALSE	3.06948	FALSE	1.42681	FALSE	-1.91274	FALSE	1.47549	FALSE
chr1	29670208	29670415	chr1:29670208-29670415	7.02446	0.417873	FALSE	0.381491	FALSE	0.427094	FALSE	1.95254	FALSE	-0.660926	FALSE	0.47256	FALSE
chr1	29676128	29676170	chr1:29676128-29676170	6.42051	0.109252	FALSE	-0.948998	FALSE	1.89291	FALSE	1.22183	FALSE	1.06073	FALSE	1.74045	FALSE
chr1	29781239	29781370	chr1:29781239-29781370	6.48663	-0.696585	FALSE	0.319644	FALSE	-0.497759	FALSE	-0.640184	FALSE	-0.279522	FALSE	0.239007	FALSE
chr1	29786581	29786785	chr1:29786581-29786785	6.69987	-0.931626	FALSE	-0.799754	FALSE	-2.56929	Down	-3.26717	Down	-1.44924	FALSE	-0.439953	FALSE
chr1	29787944	29788172	chr1:29787944-29788172	31.7805	0.310821	FALSE	0.306594	FALSE	-0.907636	FALSE	-0.141151	FALSE	-0.358326	FALSE	0.377932	FALSE
chr1	29846819	29846917	chr1:29846819-29846917	5.4295	-0.70398	FALSE	-1.36083	FALSE	0.665874	FALSE	-1.0218	FALSE	-0.0493085	FALSE	-0.588122	FALSE
chr1	29936526	29936649	chr1:29936526-29936649	7.48462	0.992959	FALSE	-0.9196	FALSE	0.878097	FALSE	0.372078	FALSE	-0.956183	FALSE	-0.688342	FALSE
chr1	29978228	29978314	chr1:29978228-29978314	22.6235	1.19949	FALSE	0.166396	FALSE	0.217895	FALSE	-0.490195	FALSE	-0.494831	FALSE	0.300741	FALSE
chr1	29978672	29978829	chr1:29978672-29978829	106.915	0.172997	FALSE	-0.127095	FALSE	0.079573	FALSE	-0.252079	FALSE	-0.0736714	FALSE	0.189804	FALSE
chr1	29980573	29980589	chr1:29980573-29980589	7.4114	-0.190249	FALSE	-0.969266	FALSE	-0.617495	FALSE	-0.861233	FALSE	0.35166	FALSE	-0.694465	FALSE
chr1	29986030	29986210	chr1:29986030-29986210	13.2919	1.19608	FALSE	-0.685353	FALSE	-0.513605	FALSE	-0.240771	FALSE	0.359592	FALSE	1.01791	FALSE
chr1	29986621	29986656	chr1:29986621-29986656	9.32496	-0.942547	FALSE	0.203239	FALSE	-0.771274	FALSE	-0.854772	FALSE	-0.855517	FALSE	0.773422	FALSE
chr1	29989028	29989199	chr1:29989028-29989199	11.9717	0.403736	FALSE	-0.157951	FALSE	1.06372	FALSE	1.76384	Up	0.312035	FALSE	0.964014	FALSE
chr1	29989432	29989538	chr1:29989432-29989538	14.1031	0.32838	FALSE	0.744316	FALSE	0.842332	FALSE	-0.382432	FALSE	-0.60633	FALSE	0.611573	FALSE
chr1	29990670	29990857	chr1:29990670-29990857	19.7874	-0.461797	FALSE	-0.18159	FALSE	0.359515	FALSE	-0.253207	FALSE	0.155098	FALSE	0.536007	FALSE
chr1	29992590	29992740	chr1:29992590-29992740	7.12818	0	FALSE	0.147068	FALSE	0.963207	FALSE	-0.226913	FALSE	0.032874	FALSE	0.209116	FALSE
chr1	30000446	30000533	chr1:30000446-30000533	3.45104	0	FALSE	-0.650965	FALSE	-0.120859	FALSE	-0.252439	FALSE	-0.683183	FALSE	0.755051	FALSE
chr1	30119066	30119178	chr1:30119066-30119178	3.57241	0.60996	FALSE	0.9543	FALSE	0.983857	FALSE	-1.69063	FALSE	-0.452039	FALSE	1.51649	FALSE
chr1	30284199	30284354	chr1:30284199-30284354	2.7021	0.411609	FALSE	-0.753381	FALSE	-2.18278	FALSE	-1.34927	FALSE	-1.50006	FALSE	-0.958308	FALSE
chr1	30301277	30301406	chr1:30301277-30301406	2.27157	0	FALSE	-2.4362	FALSE	-0.843626	FALSE	-4.17411	Down	-0.350107	FALSE	-0.38445	FALSE
chr1	30402324	30402458	chr1:30402324-30402458	8.58441	-2.38612	FALSE	-1.562	FALSE	0.37575	FALSE	-2.07639	Down	-0.425038	FALSE	0.681339	FALSE
chr1	30402797	30402856	chr1:30402797-30402856	13.5656	-1.48356	FALSE	-0.65676	FALSE	-0.988287	FALSE	-1.069	FALSE	-0.351606	FALSE	0.327356	FALSE
chr1	30403087	30403112	chr1:30403087-30403112	4.42932	0.809346	FALSE	-1.98995	FALSE	-0.514057	FALSE	-0.104914	FALSE	-1.12769	FALSE	0.630203	FALSE
chr1	30403391	30403393	chr1:30403391-30403393	2.77465	-1.83014	FALSE	1.18806	FALSE	-1.64222	FALSE	-2.87532	FALSE	-0.576254	FALSE	1.11173	FALSE
chr1	30413491	30413592	chr1:30413491-30413592	16.2707	-0.160247	FALSE	0.0855375	FALSE	-0.422774	FALSE	-1.27056	Down	-0.316211	FALSE	-0.125561	FALSE
chr1	30413866	30414094	chr1:30413866-30414094	45.0491	-0.196383	FALSE	-0.392691	FALSE	-1.24969	Down	-1.26891	Down	-0.301745	FALSE	0.132649	FALSE
chr1	30415036	30415288	chr1:30415036-30415288	29.9875	-2.56499	FALSE	-5.49401	Down	-2.82653	Down	-3.84865	Down	-0.556485	FALSE	-0.174956	FALSE
chr1	30420427	30420458	chr1:30420427-30420458	3.02638	-0.155553	FALSE	-3.9687	FALSE	-0.414891	FALSE	-1.70313	FALSE	-1.44523	FALSE	0.507425	FALSE
chr1	30420690	30420871	chr1:30420690-30420871	11.256	-2.34083	FALSE	-1.61095	FALSE	-1.66514	FALSE	-0.82042	FALSE	0.217784	FALSE	1.6057	Up
chr1	30434085	30434120	chr1:30434085-30434120	2.85352	0	FALSE	-1.86823	FALSE	-4.81732	Down	-4.95959	Down	-1.38621	FALSE	-0.924453	FALSE
chr1	30478688	30478711	chr1:30478688-30478711	3.26927	2.30454	FALSE	-1.34348	FALSE	-1.74196	FALSE	-5.33471	Down	-0.466216	FALSE	0.0327771	FALSE
chr1	30548889	30549037	chr1:30548889-30549037	2.74055	1.68997	FALSE	-0.903299	FALSE	-3.35738	FALSE	-5.13592	Down	-2.39142	FALSE	-3.98916	Down
chr1	30558062	30558082	chr1:30558062-30558082	3.86103	-0.599733	FALSE	-2.02227	FALSE	0.510253	FALSE	1.44524	FALSE	0.517419	FALSE	1.54787	FALSE
chr1	30558542	30558942	chr1:30558542-30558942	5.10322	-1.35619	FALSE	-1.31283	FALSE	1.3457	FALSE	0.258997	FALSE	-0.150423	FALSE	1.81895	FALSE
chr1	30682840	30682896	chr1:30682840-30682896	2.71773	1.5544	FALSE	1.85943	FALSE	1.07003	FALSE	-1.41482	FALSE	2.65697	FALSE	-1.62783	FALSE
chr1	30773794	30773846	chr1:30773794-30773846	4.96598	-0.517895	FALSE	-0.308934	FALSE	-0.13137	FALSE	0.991568	FALSE	-0.351885	FALSE	1.23868	FALSE
chr1	30779769	30779822	chr1:30779769-30779822	3.07987	-0.318304	FALSE	-0.130831	FALSE	0.669015	FALSE	0.0858852	FALSE	-0.459255	FALSE	-1.85295	FALSE
chr1	30780499	30780535	chr1:30780499-30780535	3.01807	-1.62199	FALSE	-2.08508	FALSE	0.65018	FALSE	-0.230871	FALSE	0.392301	FALSE	1.14284	FALSE
chr1	30789828	30789847	chr1:30789828-30789847	3.08979	-0.299492	FALSE	2.11632	FALSE	0.144348	FALSE	0.541192	FALSE	1.04472	FALSE	-0.258195	FALSE
chr1	30805082	30805094	chr1:30805082-30805094	4.93624	0.235675	FALSE	3.47661	FALSE	-1.37152	FALSE	-1.48057	FALSE	-0.416786	FALSE	-2.38393	Down
chr1	30816382	30816430	chr1:30816382-30816430	10.172	0.0139474	FALSE	-0.192459	FALSE	0.847597	FALSE	-0.440339	FALSE	-0.793046	FALSE	0.842306	FALSE
chr1	30817500	30817598	chr1:30817500-30817598	10.9211	-0.258758	FALSE	-0.190528	FALSE	0.54498	FALSE	0.104154	FALSE	0.19197	FALSE	0.119043	FALSE
chr1	30817802	30818277	chr1:30817802-30818277	16.7571	-0.2845	FALSE	0.266049	FALSE	0.180125	FALSE	-0.745209	FALSE	0.252534	FALSE	0.0308099	FALSE
chr1	30830096	30830318	chr1:30830096-30830318	5.5494	-0.575352	FALSE	0.271849	FALSE	0.468119	FALSE	0.316218	FALSE	0.48267	FALSE	1.1366	FALSE
chr1	30851031	30851194	chr1:30851031-30851194	31.549	-1.52588	FALSE	-0.358579	FALSE	0.269903	FALSE	0.808203	FALSE	-0.286134	FALSE	0.806871	FALSE
chr1	30852024	30852119	chr1:30852024-30852119	6.91848	-2.01347	FALSE	-1.16227	FALSE	-0.167079	FALSE	-0.266622	FALSE	0.0511073	FALSE	1.02077	FALSE
chr1	30862136	30862213	chr1:30862136-30862213	10.8947	-0.766817	FALSE	-0.39718	FALSE	-0.684063	FALSE	-0.0328553	FALSE	-0.254078	FALSE	-0.685507	FALSE
chr1	30864831	30865140	chr1:30864831-30865140	9.60571	-0.803326	FALSE	0.639202	FALSE	1.751	Up	0.386832	FALSE	0.629467	FALSE	1.17841	FALSE
chr1	30867948	30868066	chr1:30867948-30868066	6.96124	-2.38691	FALSE	0.398672	FALSE	0.423556	FALSE	-0.844382	FALSE	-0.323571	FALSE	0.216102	FALSE
chr1	30873945	30874272	chr1:30873945-30874272	26.1728	-0.101884	FALSE	0.198973	FALSE	0.0809755	FALSE	-0.737232	FALSE	-0.200464	FALSE	-0.0224704	FALSE
chr1	30875933	30876019	chr1:30875933-30876019	19.4483	0.889045	FALSE	0.134133	FALSE	-0.100696	FALSE	-0.785146	FALSE	0.0114915	FALSE	-1.14201	FALSE
chr1	30877815	30878023	chr1:30877815-30878023	14.2957	0.630168	FALSE	-0.683413	FALSE	1.30409	Up	2.06917	Up	-0.173046	FALSE	0.144083	FALSE
chr1	30883937	30884108	chr1:30883937-30884108	7.16901	-1.56649	FALSE	-0.665114	FALSE	-3.01566	Down	-2.47627	Down	-2.39129	FALSE	-3.13395	Down
chr1	30885554	30885912	chr1:30885554-30885912	5.75027	-1.11097	FALSE	0.894081	FALSE	0.340848	FALSE	0.438949	FALSE	-0.786163	FALSE	1.10164	FALSE
chr1	30887637	30887762	chr1:30887637-30887762	7.59903	1.96796	FALSE	0.405882	FALSE	-0.140934	FALSE	-1.07759	FALSE	-0.610231	FALSE	-0.0902545	FALSE
chr1	30892668	30892843	chr1:30892668-30892843	11.2714	0.446694	FALSE	-0.70805	FALSE	1.60428	FALSE	-0.102061	FALSE	0.39267	FALSE	1.54092	FALSE
chr1	30895503	30895669	chr1:30895503-30895669	15.0048	-0.493429	FALSE	-0.0695882	FALSE	0.705765	FALSE	-0.853743	FALSE	0.206374	FALSE	-0.470178	FALSE
chr1	30897317	30897345	chr1:30897317-30897345	7.78899	-0.913715	FALSE	-1.4947	FALSE	-0.69972	FALSE	-1.25851	FALSE	-0.741846	FALSE	0.354209	FALSE
chr1	30898796	30898948	chr1:30898796-30898948	22.9624	-1.22974	FALSE	-0.583931	FALSE	-1.3729	Down	-2.1769	Down	-0.617194	FALSE	-0.193652	FALSE
chr1	30899980	30900074	chr1:30899980-30900074	16.808	-0.764284	FALSE	-1.75124	FALSE	-1.34932	FALSE	-1.22128	Down	-0.232702	FALSE	-0.174934	FALSE
chr1	30903975	30904163	chr1:30903975-30904163	35.2196	0.930901	FALSE	-0.374716	FALSE	0.503713	FALSE	0.521672	FALSE	-0.242971	FALSE	-0.0663401	FALSE
chr1	30906584	30906671	chr1:30906584-30906671	17.918	-0.361282	FALSE	0.575616	FALSE	0.332973	FALSE	-0.0262356	FALSE	-0.265109	FALSE	0.591691	FALSE
chr1	30908885	30909064	chr1:30908885-30909064	76.0643	-0.0624762	FALSE	-0.104398	FALSE	0.632879	FALSE	0.238336	FALSE	-0.278769	FALSE	0.593556	FALSE
chr1	30921026	30921033	chr1:30921026-30921033	12.3159	0.0861293	FALSE	-0.0548967	FALSE	-0.569284	FALSE	0.0970937	FALSE	-1.07452	FALSE	-0.85854	FALSE
chr1	30922444	30922563	chr1:30922444-30922563	24.1128	0.288332	FALSE	0.800981	FALSE	-0.620445	FALSE	-0.608688	FALSE	0.123735	FALSE	0.139175	FALSE
chr1	30929397	30929724	chr1:30929397-30929724	6.74448	0.2352	FALSE	0.0599066	FALSE	-0.518489	FALSE	-1.82951	FALSE	0.364897	FALSE	0.261999	FALSE
chr1	30937509	30937885	chr1:30937509-30937885	25.341	-0.151833	FALSE	0.325041	FALSE	0.140268	FALSE	0.203146	FALSE	0.0278481	FALSE	0.516598	FALSE
chr1	30938090	30938160	chr1:30938090-30938160	12.0983	-0.404731	FALSE	1.1137	FALSE	-0.38474	FALSE	-1.0304	FALSE	-0.491189	FALSE	0.214292	FALSE
chr1	30940724	30940990	chr1:30940724-30940990	24.4005	-1.18068	FALSE	-1.0591	FALSE	-0.687978	FALSE	-0.901909	FALSE	0.395658	FALSE	0.738312	FALSE
chr1	30949878	30950103	chr1:30949878-30950103	89.6129	0.0386111	FALSE	0.0308801	FALSE	0.0889666	FALSE	-0.228795	FALSE	-0.0264596	FALSE	0.276283	FALSE
chr1	30952068	30952215	chr1:30952068-30952215	28.9286	-1.72975	FALSE	-0.828771	FALSE	-1.60639	Down	-1.60812	Down	-0.272031	FALSE	0.243217	FALSE
chr1	30955985	30956181	chr1:30955985-30956181	18.2264	-0.433862	FALSE	0.176368	FALSE	0.446095	FALSE	-0.980693	FALSE	0.455049	FALSE	0.82737	FALSE
chr1	30964514	30964605	chr1:30964514-30964605	3.40374	-2.44148	FALSE	-1.24961	FALSE	-0.284911	FALSE	0.85713	FALSE	0.811465	FALSE	2.04545	FALSE
chr1	30973963	30974032	chr1:30973963-30974032	4.71918	1.47109	FALSE	0.732829	FALSE	-2.04555	FALSE	-0.564242	FALSE	0.202886	FALSE	-1.68285	FALSE
chr1	30987899	30988032	chr1:30987899-30988032	12.2127	-1.6936	FALSE	-0.465404	FALSE	0.542515	FALSE	1.51089	FALSE	0.148651	FALSE	0.638401	FALSE
chr1	30989231	30989358	chr1:30989231-30989358	24.5647	-0.191879	FALSE	0.285104	FALSE	-0.416435	FALSE	-0.087591	FALSE	0.220911	FALSE	0.37424	FALSE
chr1	31023374	31023378	chr1:31023374-31023378	4.11675	-0.289844	FALSE	-0.490103	FALSE	-2.24456	FALSE	1.68219	FALSE	-0.293817	FALSE	1.01405	FALSE
chr1	31027444	31027486	chr1:31027444-31027486	2.06997	-2.43208	FALSE	-2.50705	FALSE	0.980055	FALSE	-2.03981	FALSE	1.44773	FALSE	1.14284	FALSE
chr1	31038299	31038428	chr1:31038299-31038428	16.8419	0.187835	FALSE	0.23927	FALSE	0.272139	FALSE	-1.00748	FALSE	-0.468435	FALSE	-1.28648	FALSE
chr1	31069483	31069554	chr1:31069483-31069554	5.55216	0.839514	FALSE	1.54421	FALSE	1.29693	FALSE	-1.73113	FALSE	2.15686	FALSE	0.181052	FALSE
chr1	31103998	31104030	chr1:31103998-31104030	4.11297	0.587878	FALSE	0.710619	FALSE	1.50933	FALSE	-0.49283	FALSE	0.078739	FALSE	0.537433	FALSE
chr1	31150724	31150816	chr1:31150724-31150816	5.19707	0.0880396	FALSE	-0.660648	FALSE	-1.79609	FALSE	-0.417424	FALSE	-0.570463	FALSE	-0.888993	FALSE
chr1	31156337	31156600	chr1:31156337-31156600	15.3163	-1.04962	FALSE	-0.975499	FALSE	0.138448	FALSE	0.769945	FALSE	-1.44785	FALSE	-0.395472	FALSE
chr1	31157024	31157087	chr1:31157024-31157087	3.17615	2.22008	FALSE	-1.43028	FALSE	-0.184509	FALSE	0.202713	FALSE	-3.11906	FALSE	0.761828	FALSE
chr1	31222634	31222757	chr1:31222634-31222757	10.8557	0.315845	FALSE	1.46249	FALSE	0.10243	FALSE	-2.56709	Down	-0.476768	FALSE	-1.06593	FALSE
chr1	31227636	31227693	chr1:31227636-31227693	2.82086	0.215475	FALSE	0.47275	FALSE	-0.443695	FALSE	-1.4028	FALSE	0.901994	FALSE	-0.135357	FALSE
chr1	31235353	31235454	chr1:31235353-31235454	7.43776	0.237197	FALSE	0.271877	FALSE	0.44842	FALSE	0.39778	FALSE	-0.801466	FALSE	-0.0932806	FALSE
chr1	31600630	31600707	chr1:31600630-31600707	2.20035	-0.214286	FALSE	-0.592611	FALSE	1.07089	FALSE	1.01227	FALSE	1.00873	FALSE	0.124061	FALSE
chr1	31600986	31601071	chr1:31600986-31601071	3.84345	-1.17486	FALSE	-0.736121	FALSE	1.09213	FALSE	1.29704	FALSE	0.25474	FALSE	-0.0833506	FALSE
chr1	31627529	31627638	chr1:31627529-31627638	3.72822	1.13844	FALSE	-0.562213	FALSE	1.62612	FALSE	1.35621	FALSE	-0.426477	FALSE	1.10316	FALSE
chr1	31678707	31678790	chr1:31678707-31678790	4.315	-0.156062	FALSE	-2.60002	FALSE	-0.0423874	FALSE	-3.2287	Down	-0.516916	FALSE	-1.77475	FALSE
chr1	31938028	31938201	chr1:31938028-31938201	9.04789	0.938117	FALSE	1.78548	FALSE	-1.49895	Down	-0.356297	FALSE	-2.08447	FALSE	-3.74508	Down
chr1	32035500	32035642	chr1:32035500-32035642	8.15438	0.210301	FALSE	0.889821	FALSE	1.82744	FALSE	3.32192	Up	0.699691	FALSE	-0.386732	FALSE
chr1	32123446	32123492	chr1:32123446-32123492	0.770319	3.00235	FALSE	0.176723	FALSE	1.94515	FALSE	-2.16192	FALSE	0.8167	FALSE	0.54996	FALSE
chr1	32172608	32172781	chr1:32172608-32172781	31.6204	-0.74441	FALSE	0.140034	FALSE	0.128961	FALSE	-0.28758	FALSE	0.323073	FALSE	0.33273	FALSE
chr1	32700348	32700350	chr1:32700348-32700350	3.81031	0.56553	FALSE	0.687352	FALSE	-0.575679	FALSE	2.58791	FALSE	-1.50644	FALSE	-0.0807945	FALSE
chr1	32701976	32702025	chr1:32701976-32702025	2.80703	-0.388737	FALSE	0.00104225	FALSE	-1.33138	FALSE	0.134176	FALSE	-0.850451	FALSE	-0.113683	FALSE
chr1	32702250	32702256	chr1:32702250-32702256	4.73485	-1.02598	FALSE	-0.447389	FALSE	-1.43158	FALSE	-0.620159	FALSE	-0.668213	FALSE	-0.30012	FALSE
chr1	32718685	32718694	chr1:32718685-32718694	9.22344	1.10596	FALSE	0.420573	FALSE	-1.06108	FALSE	-0.902446	FALSE	-0.451431	FALSE	0.206938	FALSE
chr1	32719809	32719992	chr1:32719809-32719992	65.5661	0.0526855	FALSE	-0.108023	FALSE	-0.233321	FALSE	-0.0597026	FALSE	0.12599	FALSE	0.430098	FALSE
chr1	32834970	32835149	chr1:32834970-32835149	11.8728	-0.326751	FALSE	-0.867856	FALSE	-0.547869	FALSE	0.12026	FALSE	-0.296154	FALSE	0.608228	FALSE
chr1	33271608	33271685	chr1:33271608-33271685	5.28116	-2.68972	FALSE	-1.90002	FALSE	0.9146	FALSE	-0.703154	FALSE	-0.356872	FALSE	-0.955647	FALSE
chr1	33456411	33456491	chr1:33456411-33456491	1.57413	-0.153143	FALSE	-0.290033	FALSE	0.464222	FALSE	-0.325114	FALSE	0.8601	FALSE	1.24755	FALSE
chr1	33477308	33477402	chr1:33477308-33477402	3.90671	0.855945	FALSE	0.703281	FALSE	-1.0742	FALSE	0.156292	FALSE	0.234858	FALSE	-0.510246	FALSE
chr1	33481909	33481925	chr1:33481909-33481925	3.99797	0.167889	FALSE	0.529306	FALSE	0.772694	FALSE	0.376812	FALSE	-1.01343	FALSE	-0.244924	FALSE
chr1	33555787	33555962	chr1:33555787-33555962	17.861	-1.57484	FALSE	-1.29702	FALSE	-2.68299	Down	-3.42734	Down	-1.84046	Down	-1.68293	Down
chr1	33556483	33556866	chr1:33556483-33556866	5.82756	-0.248916	FALSE	-0.506556	FALSE	1.03479	FALSE	0.225066	FALSE	-0.238984	FALSE	0.453659	FALSE
chr1	33565899	33566034	chr1:33565899-33566034	7.77166	-0.893288	FALSE	0.191173	FALSE	-0.723346	FALSE	0.0337188	FALSE	0.328712	FALSE	-0.281781	FALSE
chr1	33577842	33577964	chr1:33577842-33577964	6.65854	-0.484022	FALSE	-1.31896	FALSE	0.437871	FALSE	1.90503	Up	0.373509	FALSE	-0.194613	FALSE
chr1	33583424	33583661	chr1:33583424-33583661	10.5999	-2.36088	FALSE	-1.65585	FALSE	-0.612428	FALSE	0.845696	FALSE	-0.317403	FALSE	-0.0504048	FALSE
chr1	33584013	33584047	chr1:33584013-33584047	3.41455	-4.12886	FALSE	0.0908715	FALSE	-0.101628	FALSE	0.605823	FALSE	-0.345803	FALSE	0.220712	FALSE
chr1	33584394	33584406	chr1:33584394-33584406	4.23942	-3.19235	FALSE	0.110156	FALSE	-0.917242	FALSE	-0.0292523	FALSE	0.123324	FALSE	0.68048	FALSE
chr1	33585510	33585514	chr1:33585510-33585514	6.55842	-0.220535	FALSE	-0.683523	FALSE	0.513552	FALSE	0.545879	FALSE	0.698228	FALSE	0.325616	FALSE
chr1	33600376	33600570	chr1:33600376-33600570	2.47638	-0.533553	FALSE	1.07397	FALSE	0.723573	FALSE	0.414017	FALSE	1.08739	FALSE	-0.155162	FALSE
chr1	33601377	33601383	chr1:33601377-33601383	2.29959	-0.00935765	FALSE	0.950555	FALSE	1.48067	FALSE	-0.370165	FALSE	1.28192	FALSE	1.15084	FALSE
chr1	33616852	33616909	chr1:33616852-33616909	3.82387	-0.0209286	FALSE	0.313762	FALSE	-0.340401	FALSE	0.123033	FALSE	0.313087	FALSE	-0.745736	FALSE
chr1	33618525	33618580	chr1:33618525-33618580	4.28825	-0.19932	FALSE	0.558917	FALSE	0.297496	FALSE	0.352755	FALSE	-1.0991	FALSE	0.181184	FALSE
chr1	33621907	33622082	chr1:33621907-33622082	12.2594	-0.300547	FALSE	0.0710392	FALSE	-0.697051	FALSE	-0.931728	FALSE	-0.126984	FALSE	-0.352542	FALSE
chr1	33631253	33631455	chr1:33631253-33631455	2.94952	1.8623	FALSE	0.85273	FALSE	-0.0133693	FALSE	-0.548634	FALSE	-0.0894756	FALSE	-1.63721	FALSE
chr1	33632299	33632352	chr1:33632299-33632352	3.93462	0.661692	FALSE	1.71098	FALSE	-0.482204	FALSE	-1.71704	FALSE	-1.2043	FALSE	-1.34479	FALSE
chr1	33637907	33638050	chr1:33637907-33638050	12.9962	-0.341349	FALSE	-0.504505	FALSE	0.187085	FALSE	-0.674682	FALSE	-0.0589265	FALSE	-0.402813	FALSE
chr1	33668792	33668807	chr1:33668792-33668807	4.1163	-1.25326	FALSE	1.28143	FALSE	-1.20583	FALSE	-0.987726	FALSE	-1.38821	FALSE	-1.51882	FALSE
chr1	33669734	33669848	chr1:33669734-33669848	15.4241	-0.235996	FALSE	-0.593727	FALSE	0.0410528	FALSE	-1.27093	FALSE	-0.609238	FALSE	0.964649	FALSE
chr1	33670273	33670471	chr1:33670273-33670471	3.04523	-0.32786	FALSE	-0.682824	FALSE	-0.958725	FALSE	-1.8767	FALSE	-0.788592	FALSE	0.0654336	FALSE
chr1	33680639	33680759	chr1:33680639-33680759	5.22885	-2.04613	FALSE	-1.4991	FALSE	-0.603614	FALSE	-1.52153	FALSE	0.0151819	FALSE	-0.967772	FALSE
chr1	33684604	33684613	chr1:33684604-33684613	3.62522	-1.16375	FALSE	-0.344127	FALSE	0.262912	FALSE	-0.199003	FALSE	-0.769888	FALSE	0.306178	FALSE
chr1	33709773	33709883	chr1:33709773-33709883	5.34566	-0.639528	FALSE	0.707218	FALSE	0.0757683	FALSE	-1.12843	FALSE	2.24837	FALSE	1.11966	FALSE
chr1	33714931	33715051	chr1:33714931-33715051	13.3518	-1.16107	FALSE	-1.28832	FALSE	-1.41989	FALSE	-1.29475	Down	0.279803	FALSE	-0.509906	FALSE
chr1	33719778	33720138	chr1:33719778-33720138	8.33301	-0.446863	FALSE	0.232113	FALSE	-1.02634	FALSE	-0.36875	FALSE	0.689362	FALSE	-0.469207	FALSE
chr1	33720392	33720405	chr1:33720392-33720405	3.93062	-0.400312	FALSE	-0.388627	FALSE	-1.68742	FALSE	-1.48222	FALSE	0.0393335	FALSE	-0.306916	FALSE
chr1	33725351	33725353	chr1:33725351-33725353	3.53691	1.8899	FALSE	-0.294916	FALSE	1.40907	FALSE	-0.424845	FALSE	0.132799	FALSE	-0.136046	FALSE
chr1	33725591	33725613	chr1:33725591-33725613	3.0464	1.78767	FALSE	0.377714	FALSE	-0.288112	FALSE	-0.609022	FALSE	-0.688394	FALSE	0.549964	FALSE
chr1	33727444	33727512	chr1:33727444-33727512	3.88788	0.625845	FALSE	0.873227	FALSE	3.24962	FALSE	0.451403	FALSE	1.17095	FALSE	-0.920826	FALSE
chr1	33733194	33733229	chr1:33733194-33733229	3.49564	0.805638	FALSE	0.151351	FALSE	-2.31414	FALSE	-0.132936	FALSE	0.803001	FALSE	0.948811	FALSE
chr1	33739475	33739564	chr1:33739475-33739564	6.31054	-0.531972	FALSE	-0.00841999	FALSE	0.246869	FALSE	-0.845608	FALSE	-0.00548511	FALSE	-0.0982065	FALSE
chr1	33744136	33744144	chr1:33744136-33744144	4.35202	1.09603	FALSE	-0.176962	FALSE	-0.902878	FALSE	-0.0691309	FALSE	0.0219185	FALSE	-0.429944	FALSE
chr1	33746146	33746218	chr1:33746146-33746218	4.13322	0.556724	FALSE	0.878029	FALSE	2.01413	FALSE	1.01473	FALSE	-0.0398567	FALSE	1.8197	FALSE
chr1	33749210	33749362	chr1:33749210-33749362	6.24608	0.117677	FALSE	0.525977	FALSE	0.258502	FALSE	0.248924	FALSE	0.127449	FALSE	-0.210108	FALSE
chr1	33756319	33756400	chr1:33756319-33756400	1.55957	-2.43856	FALSE	1.7917	FALSE	-1.04377	FALSE	-2.22099	FALSE	1.20182	FALSE	1.31452	FALSE
chr1	33757621	33757971	chr1:33757621-33757971	4.19408	-0.2948	FALSE	-0.913847	FALSE	0.101452	FALSE	0.695495	FALSE	1.47218	FALSE	0.91323	FALSE
chr1	33779559	33779652	chr1:33779559-33779652	9.20085	0.451096	FALSE	1.59479	FALSE	1.28892	FALSE	0.642307	FALSE	0.825605	FALSE	0.331152	FALSE
chr1	33784765	33784948	chr1:33784765-33784948	1.24319	0.83612	FALSE	2.27341	FALSE	1.56414	FALSE	1.02845	FALSE	0.194595	FALSE	1.44928	FALSE
chr1	33792697	33792756	chr1:33792697-33792756	2.83289	0.815606	FALSE	-1.32266	FALSE	0.206219	FALSE	1.2557	FALSE	0.0605438	FALSE	1.50055	FALSE
chr1	33794653	33794734	chr1:33794653-33794734	5.37608	-0.313589	FALSE	1.03361	FALSE	1.22792	FALSE	1.43369	FALSE	0.103171	FALSE	0.522465	FALSE
chr1	33810263	33810457	chr1:33810263-33810457	4.09542	-0.874949	FALSE	0.367292	FALSE	-0.894439	FALSE	-1.42436	FALSE	0.0285441	FALSE	-0.276077	FALSE
chr1	33813962	33814000	chr1:33813962-33814000	3.35248	-1.22412	FALSE	0.218023	FALSE	-0.632295	FALSE	-0.0528367	FALSE	-0.468881	FALSE	0.0570884	FALSE
chr1	33814524	33814658	chr1:33814524-33814658	11.5242	-0.837548	FALSE	-0.380594	FALSE	-0.0716346	FALSE	-0.10019	FALSE	0.606295	FALSE	-0.00607256	FALSE
chr1	33819659	33819671	chr1:33819659-33819671	2.6047	0.638546	FALSE	-0.314014	FALSE	1.39588	FALSE	3.94964	Up	1.35131	FALSE	0.758657	FALSE
chr1	33829896	33829898	chr1:33829896-33829898	1.94553	-1.8595	FALSE	-0.819974	FALSE	-0.120118	FALSE	3.07724	FALSE	2.25568	FALSE	0.551137	FALSE
chr1	33839015	33839189	chr1:33839015-33839189	10.6198	0.306587	FALSE	0.313401	FALSE	1.24797	FALSE	0.165626	FALSE	-0.770405	FALSE	-0.480831	FALSE
chr1	33839661	33839857	chr1:33839661-33839857	12.9479	0.310113	FALSE	0.270818	FALSE	1.03247	FALSE	-0.431207	FALSE	1.43717	FALSE	0.229788	FALSE
chr1	33840918	33841009	chr1:33840918-33841009	10.4212	0.134565	FALSE	0.777362	FALSE	-0.543697	FALSE	0.447508	FALSE	0.08337	FALSE	0.0121575	FALSE
chr1	33848942	33849012	chr1:33848942-33849012	4.05064	0.455285	FALSE	1.32082	FALSE	-0.431991	FALSE	3.25512	FALSE	-0.0276145	FALSE	-1.6892	FALSE
chr1	33903580	33903741	chr1:33903580-33903741	15.8691	-0.0282903	FALSE	-0.385196	FALSE	0.0618524	FALSE	-0.0488836	FALSE	0.730968	FALSE	0.0271893	FALSE
chr1	33904813	33904937	chr1:33904813-33904937	7.03662	0.1679	FALSE	0.14589	FALSE	1.12063	FALSE	2.59624	FALSE	0.514472	FALSE	2.18711	FALSE
chr1	33907977	33908093	chr1:33907977-33908093	8.4198	-0.92428	FALSE	-0.93496	FALSE	-0.285438	FALSE	-0.674049	FALSE	0.486462	FALSE	0.143061	FALSE
chr1	33909185	33909347	chr1:33909185-33909347	6.56383	-2.41191	FALSE	-1.6132	FALSE	-0.228366	FALSE	0.172613	FALSE	0.330211	FALSE	-0.254412	FALSE
chr1	33910683	33910822	chr1:33910683-33910822	6.20886	3.55046	FALSE	-0.0109449	FALSE	-0.569258	FALSE	2.67981	Up	0.929025	FALSE	0.991072	FALSE
chr1	33924856	33924910	chr1:33924856-33924910	2.93123	-0.154945	FALSE	-0.804612	FALSE	-0.754796	FALSE	0.967728	FALSE	0.168278	FALSE	0.848338	FALSE
chr1	33925510	33925559	chr1:33925510-33925559	3.73952	0	FALSE	-0.927477	FALSE	-2.18109	FALSE	1.40408	FALSE	0.105634	FALSE	1.17003	FALSE
chr1	33930593	33930654	chr1:33930593-33930654	2.60463	3.88186	FALSE	0.306736	FALSE	0.255866	FALSE	-0.428828	FALSE	1.56461	FALSE	1.82895	FALSE
chr1	33938267	33938282	chr1:33938267-33938282	3.71926	-3.30024	FALSE	-0.614017	FALSE	-1.19242	FALSE	0.815594	FALSE	-0.634657	FALSE	-0.729176	FALSE
chr1	33944091	33944213	chr1:33944091-33944213	9.52726	0.465526	FALSE	0.301586	FALSE	0.626617	FALSE	1.01937	FALSE	-0.404083	FALSE	-1.037	FALSE
chr1	33945118	33945183	chr1:33945118-33945183	7.94601	-0.272998	FALSE	-0.426481	FALSE	-1.59997	FALSE	-0.0586557	FALSE	0.710673	FALSE	0.0860312	FALSE
chr1	33960061	33960162	chr1:33960061-33960162	3.95828	-1.65598	FALSE	-0.0678415	FALSE	2.40563	FALSE	3.55602	Up	0.845711	FALSE	2.5659	FALSE
chr1	33964851	33964863	chr1:33964851-33964863	3.94049	-0.174787	FALSE	-0.38519	FALSE	-0.137436	FALSE	1.01578	FALSE	-0.653867	FALSE	-0.568539	FALSE
chr1	33974893	33974990	chr1:33974893-33974990	6.18302	0.814112	FALSE	-0.459842	FALSE	-2.71229	FALSE	-2.50189	FALSE	1.11917	FALSE	0.206922	FALSE
chr1	33981145	33981232	chr1:33981145-33981232	14.5471	-0.835138	FALSE	-0.625855	FALSE	1.31099	FALSE	2.24601	Up	0.184077	FALSE	1.38988	Up
chr1	33983299	33983357	chr1:33983299-33983357	5.44278	-0.519345	FALSE	-0.108537	FALSE	-0.798891	FALSE	0.88729	FALSE	-0.586465	FALSE	1.10717	FALSE
chr1	33989915	33989918	chr1:33989915-33989918	1.83718	-3.72356	FALSE	-0.550284	FALSE	-0.296708	FALSE	0.531942	FALSE	0.489938	FALSE	2.20491	FALSE
chr1	34003110	34003175	chr1:34003110-34003175	4.4329	0.404537	FALSE	1.14018	FALSE	-0.960684	FALSE	3.21371	Up	0.264026	FALSE	0.282303	FALSE
chr1	34011171	34011605	chr1:34011171-34011605	8.79443	-2.20763	FALSE	-0.32078	FALSE	0.219671	FALSE	-0.118733	FALSE	0.0981234	FALSE	-0.419269	FALSE
chr1	34012060	34012182	chr1:34012060-34012182	5.04281	-0.264317	FALSE	0.633405	FALSE	-0.699348	FALSE	-0.0113637	FALSE	0.0969153	FALSE	0.223941	FALSE
chr1	34032396	34032429	chr1:34032396-34032429	4.2122	0.48229	FALSE	0.085723	FALSE	1.81607	FALSE	-1.39239	FALSE	-0.0791931	FALSE	0.0946073	FALSE
chr1	34038729	34038807	chr1:34038729-34038807	35.4573	-1.54998	FALSE	-1.55483	Down	-0.21035	FALSE	0.116835	FALSE	0.144315	FALSE	0.43518	FALSE
chr1	34041159	34041439	chr1:34041159-34041439	36.2248	0.457721	FALSE	-0.628556	FALSE	0.490603	FALSE	0.310224	FALSE	0.656832	FALSE	0.949202	Up
chr1	34060695	34060790	chr1:34060695-34060790	13.6309	-0.163849	FALSE	0.798595	FALSE	0.622893	FALSE	0.545876	FALSE	0.391643	FALSE	0.194989	FALSE
chr1	34061310	34061387	chr1:34061310-34061387	8.76821	2.20263	FALSE	-0.075721	FALSE	-0.849293	FALSE	-0.648941	FALSE	-0.562166	FALSE	0.0236201	FALSE
chr1	34064019	34064141	chr1:34064019-34064141	7.10254	-0.681217	FALSE	-0.405424	FALSE	-1.80877	FALSE	-3.06097	Down	0.276224	FALSE	-0.178179	FALSE
chr1	34066560	34066698	chr1:34066560-34066698	14.9037	-0.594465	FALSE	-1.46507	FALSE	-0.254448	FALSE	-0.661765	FALSE	0.829829	FALSE	0.374497	FALSE
chr1	34068543	34068579	chr1:34068543-34068579	7.13508	0.455824	FALSE	0.091424	FALSE	-0.693939	FALSE	-1.1511	FALSE	0.070071	FALSE	-0.16894	FALSE
chr1	34073625	34073995	chr1:34073625-34073995	14.2597	-0.724405	FALSE	-0.574367	FALSE	-1.87737	Down	-1.75031	Down	0.251599	FALSE	0.0750459	FALSE
chr1	34074490	34074715	chr1:34074490-34074715	18.2645	-2.70067	FALSE	-1.96665	FALSE	-3.74415	Down	-3.31027	Down	-0.685726	FALSE	-0.21102	FALSE
chr1	34077147	34077232	chr1:34077147-34077232	9.55599	-1.66063	FALSE	0.753384	FALSE	-0.797508	FALSE	-1.31711	FALSE	-0.242031	FALSE	-0.555533	FALSE
chr1	34085798	34085805	chr1:34085798-34085805	2.53957	-1.11008	FALSE	-0.848691	FALSE	-3.84331	Down	-3.54743	Down	-1.44769	FALSE	-0.409384	FALSE
chr1	34086071	34086090	chr1:34086071-34086090	3.44135	0.303327	FALSE	-2.45126	FALSE	-2.86261	FALSE	-2.54543	Down	-1.85398	FALSE	-1.33385	FALSE
chr1	34088564	34088736	chr1:34088564-34088736	4.97503	0.630567	FALSE	0.688451	FALSE	0.338105	FALSE	-1.31523	FALSE	-1.00573	FALSE	1.81601	FALSE
chr1	34093845	34093927	chr1:34093845-34093927	6.08262	1.16903	FALSE	-0.167601	FALSE	0.343348	FALSE	-0.546688	FALSE	-0.119439	FALSE	-0.930017	FALSE
chr1	34097639	34097816	chr1:34097639-34097816	4.2439	-1.98361	FALSE	-0.71301	FALSE	0.206775	FALSE	0.834008	FALSE	-0.20338	FALSE	0.213843	FALSE
chr1	34102782	34102953	chr1:34102782-34102953	37.3117	-0.969799	FALSE	-0.728644	FALSE	-0.39746	FALSE	-0.222933	FALSE	-0.588666	FALSE	0.124722	FALSE
chr1	34103349	34103403	chr1:34103349-34103403	11.5473	-1.19937	FALSE	0.551298	FALSE	-0.87116	FALSE	-0.551761	FALSE	-0.236214	FALSE	-0.350487	FALSE
chr1	34103810	34104107	chr1:34103810-34104107	13.4712	-0.563346	FALSE	-0.830533	FALSE	-0.531364	FALSE	-0.502647	FALSE	-0.106748	FALSE	-0.557682	FALSE
chr1	34106875	34107287	chr1:34106875-34107287	16.5448	-0.862289	FALSE	0.553747	FALSE	0.202778	FALSE	-0.688651	FALSE	-0.24588	FALSE	-0.315864	FALSE
chr1	34107546	34107709	chr1:34107546-34107709	9.7677	-1.88907	FALSE	-0.573362	FALSE	-0.427245	FALSE	-1.43874	FALSE	-0.688681	FALSE	-0.102547	FALSE
chr1	34111049	34111136	chr1:34111049-34111136	29.3733	-0.772801	FALSE	-0.303984	FALSE	-0.865648	FALSE	-0.0116766	FALSE	0.227855	FALSE	0.554893	FALSE
chr1	34112723	34112865	chr1:34112723-34112865	12.8106	-0.205401	FALSE	-1.29932	FALSE	-0.400558	FALSE	-0.250706	FALSE	0.394751	FALSE	0.773364	FALSE
chr1	34116452	34116640	chr1:34116452-34116640	14.5709	-1.10284	FALSE	-0.583562	FALSE	-0.38531	FALSE	-1.73312	Down	0.330772	FALSE	0.638827	FALSE
chr1	34120250	34120294	chr1:34120250-34120294	6.04731	0.131905	FALSE	-0.48662	FALSE	0.659717	FALSE	-0.601863	FALSE	0.872114	FALSE	-0.23265	FALSE
chr1	34127851	34127946	chr1:34127851-34127946	5.41959	0.316388	FALSE	-0.151452	FALSE	-1.61545	FALSE	0.183443	FALSE	-0.10009	FALSE	0.909761	FALSE
chr1	34140208	34140379	chr1:34140208-34140379	41.3507	0.226951	FALSE	0.0953915	FALSE	-0.224423	FALSE	-0.0340517	FALSE	-0.539944	FALSE	0.443527	FALSE
chr1	34160071	34160236	chr1:34160071-34160236	13.6856	-2.1654	FALSE	-2.45293	FALSE	-1.55483	FALSE	-0.825366	FALSE	-0.331724	FALSE	1.33225	Up
chr1	34177137	34177149	chr1:34177137-34177149	2.88868	1.93812	FALSE	3.77749	FALSE	0.0117946	FALSE	-2.28765	FALSE	0.0933287	FALSE	1.11484	FALSE
chr1	34178548	34178566	chr1:34178548-34178566	5.48627	0.258994	FALSE	-1.08193	FALSE	0.188895	FALSE	-0.461112	FALSE	-0.130675	FALSE	0.642603	FALSE
chr1	34192300	34192359	chr1:34192300-34192359	4.20408	1.32019	FALSE	-0.495841	FALSE	0.241148	FALSE	-0.632532	FALSE	0.667115	FALSE	0.17823	FALSE
chr1	34202767	34202875	chr1:34202767-34202875	2.88783	2.11946	FALSE	-1.22294	FALSE	-0.0476695	FALSE	-1.38818	FALSE	-0.522856	FALSE	1.43511	FALSE
chr1	34218504	34218583	chr1:34218504-34218583	7.2684	1.65943	FALSE	-0.58977	FALSE	0.0229446	FALSE	0.104146	FALSE	0.232945	FALSE	-0.211999	FALSE
chr1	34236499	34236611	chr1:34236499-34236611	12.9676	-0.0716559	FALSE	-0.305912	FALSE	0.711658	FALSE	0.520678	FALSE	0.555661	FALSE	0.117133	FALSE
chr1	34245466	34245532	chr1:34245466-34245532	1.68725	-0.121706	FALSE	-0.104211	FALSE	0.838318	FALSE	1.34676	FALSE	0.3946	FALSE	1.69846	FALSE
chr1	34251195	34251406	chr1:34251195-34251406	5.05441	0.308723	FALSE	-1.05754	FALSE	0.324249	FALSE	2.13297	Up	-0.0936048	FALSE	1.09839	FALSE
chr1	34260170	34260187	chr1:34260170-34260187	2.89655	-0.252852	FALSE	-0.488651	FALSE	0.966177	FALSE	1.20698	FALSE	2.07839	FALSE	-0.47522	FALSE
chr1	34261145	34261304	chr1:34261145-34261304	6.03146	-1.36955	FALSE	-0.427796	FALSE	-0.532561	FALSE	0.132617	FALSE	-0.177734	FALSE	0.600188	FALSE
chr1	34309094	34309157	chr1:34309094-34309157	4.85166	0.766969	FALSE	0.26487	FALSE	2.45662	FALSE	0.0520205	FALSE	1.53535	FALSE	0.545566	FALSE
chr1	34334853	34334941	chr1:34334853-34334941	5.46072	0.391559	FALSE	-0.276707	FALSE	0.305586	FALSE	-0.0549795	FALSE	0.757066	FALSE	1.06382	FALSE
chr1	34340253	34340332	chr1:34340253-34340332	2.09444	0.0674862	FALSE	4.11503	FALSE	-2.02023	FALSE	-1.43949	FALSE	-1.29489	FALSE	2.72348	FALSE
chr1	34362281	34362319	chr1:34362281-34362319	3.42086	-0.959871	FALSE	-0.294635	FALSE	-0.110488	FALSE	0.731281	FALSE	-0.0956052	FALSE	-1.93016	FALSE
chr1	34382249	34382307	chr1:34382249-34382307	5.53387	0.0748585	FALSE	0.373096	FALSE	0.249695	FALSE	0.605692	FALSE	-0.96877	FALSE	-1.74651	FALSE
chr1	34402200	34402354	chr1:34402200-34402354	2.47224	-2.98108	FALSE	0.840407	FALSE	-3.3778	FALSE	-2.7553	Down	-0.826247	FALSE	-4.58496	Down
chr1	34411443	34411488	chr1:34411443-34411488	5.49091	0.647429	FALSE	-0.45438	FALSE	0.65613	FALSE	0.969635	FALSE	0.0303305	FALSE	0.429041	FALSE
chr1	34433279	34433411	chr1:34433279-34433411	12.352	-0.375077	FALSE	-0.665301	FALSE	0.0321469	FALSE	0.991328	FALSE	0.507109	FALSE	-0.692197	FALSE
chr1	34437255	34437258	chr1:34437255-34437258	7.13279	-1.95623	FALSE	0.273947	FALSE	-0.58983	FALSE	1.27102	FALSE	0.0840639	FALSE	1.07951	FALSE
chr1	34439322	34439499	chr1:34439322-34439499	54.7469	-0.00129886	FALSE	-0.0788715	FALSE	0.0552593	FALSE	-0.21442	FALSE	-0.0383576	FALSE	0.186018	FALSE
chr1	34439778	34439846	chr1:34439778-34439846	57.6103	-0.574767	FALSE	-0.172476	FALSE	0.505379	FALSE	-0.338599	FALSE	0.288013	FALSE	0.180947	FALSE
chr1	34450762	34451002	chr1:34450762-34451002	18.7393	0.0142163	FALSE	0.29538	FALSE	0.864141	FALSE	1.69024	Up	0.535872	FALSE	0.583027	FALSE
chr1	34451813	34451835	chr1:34451813-34451835	3.33558	0.0563272	FALSE	0.0425227	FALSE	-1.75546	FALSE	-0.0171623	FALSE	-0.566404	FALSE	0.975336	FALSE
chr1	34459652	34459794	chr1:34459652-34459794	38.955	-0.037485	FALSE	-0.312115	FALSE	-0.617686	FALSE	0.129373	FALSE	-0.10325	FALSE	0.165371	FALSE
chr1	34469968	34470082	chr1:34469968-34470082	19.7058	-0.67766	FALSE	-3.35642	Down	-4.13383	Down	-2.8072	Down	-0.780607	FALSE	-0.831689	FALSE
chr1	34484296	34484381	chr1:34484296-34484381	2.60237	-0.396457	FALSE	1.56686	FALSE	0.279791	FALSE	-1.11638	FALSE	-0.907561	FALSE	0.227174	FALSE
chr1	34485645	34485752	chr1:34485645-34485752	8.75913	0.591092	FALSE	-0.233039	FALSE	-0.255454	FALSE	-0.242937	FALSE	0.928557	FALSE	0.359743	FALSE
chr1	34511175	34511254	chr1:34511175-34511254	6.23482	1.75677	FALSE	0.0456557	FALSE	1.59841	FALSE	-0.357719	FALSE	-0.0322966	FALSE	0.666394	FALSE
chr1	34514764	34514769	chr1:34514764-34514769	2.21059	-0.0282022	FALSE	-2.08366	FALSE	0.284755	FALSE	1.28642	FALSE	1.80425	FALSE	0.199551	FALSE
chr1	34516771	34516817	chr1:34516771-34516817	5.21787	-1.40511	FALSE	-0.261008	FALSE	0.522148	FALSE	-0.241603	FALSE	-0.2665	FALSE	-1.36849	FALSE
chr1	34522632	34522744	chr1:34522632-34522744	3.8901	1.01193	FALSE	0.111408	FALSE	1.19797	FALSE	-0.372005	FALSE	2.45234	FALSE	2.61781	FALSE
chr1	34526623	34526629	chr1:34526623-34526629	1.89004	0.819964	FALSE	-3.20497	FALSE	-4.61557	FALSE	-3.61313	FALSE	-3.48482	FALSE	-1.82263	FALSE
chr1	34536791	34537047	chr1:34536791-34537047	50.5127	0.0796455	FALSE	-0.192132	FALSE	0.237675	FALSE	0.425005	FALSE	-0.0309833	FALSE	-0.0601849	FALSE
chr1	34537255	34537323	chr1:34537255-34537323	30.6819	-0.361045	FALSE	-0.138665	FALSE	0.289216	FALSE	0.340005	FALSE	-0.0285874	FALSE	-0.0715812	FALSE
chr1	34548065	34548315	chr1:34548065-34548315	9.70391	-2.65757	FALSE	-1.02844	FALSE	-1.16603	FALSE	0.000910537	FALSE	0.246683	FALSE	0.00238874	FALSE
chr1	34549745	34549873	chr1:34549745-34549873	21.6989	-1.14974	FALSE	0.221954	FALSE	0.697937	FALSE	0.296664	FALSE	-0.140311	FALSE	1.00077	Up
chr1	34550113	34550130	chr1:34550113-34550130	5.24645	-1.01833	FALSE	-0.312877	FALSE	1.3254	FALSE	0.908652	FALSE	-0.251368	FALSE	0.822346	FALSE
chr1	34570084	34570200	chr1:34570084-34570200	12.8008	0.215385	FALSE	0.352541	FALSE	0.65554	FALSE	-0.561232	FALSE	0.636634	FALSE	-0.509998	FALSE
chr1	34573387	34573432	chr1:34573387-34573432	3.98172	1.81587	FALSE	-1.36416	FALSE	0.401881	FALSE	0.380722	FALSE	-0.17196	FALSE	-0.298217	FALSE
chr1	34579575	34579761	chr1:34579575-34579761	7.42447	1.15211	FALSE	-1.33231	FALSE	0.100359	FALSE	-0.627904	FALSE	0.705285	FALSE	0.1876	FALSE
chr1	34590189	34590246	chr1:34590189-34590246	3.25173	0.233939	FALSE	-1.55423	FALSE	1.28365	FALSE	-0.880629	FALSE	-0.750669	FALSE	0.730288	FALSE
chr1	34602486	34602574	chr1:34602486-34602574	8.72519	0.409157	FALSE	0.54985	FALSE	-0.446714	FALSE	-0.411615	FALSE	0.310211	FALSE	-0.450706	FALSE
chr1	34628038	34628128	chr1:34628038-34628128	5.46567	0.336629	FALSE	0.630335	FALSE	0.30049	FALSE	-0.745248	FALSE	1.61121	FALSE	-0.790005	FALSE
chr1	34642643	34642729	chr1:34642643-34642729	4.93432	0.852545	FALSE	0.0797619	FALSE	0.407311	FALSE	0.899775	FALSE	0.256843	FALSE	-0.461086	FALSE
chr1	34660876	34661014	chr1:34660876-34661014	5.47799	-0.22117	FALSE	0.101735	FALSE	-0.97619	FALSE	-1.51541	FALSE	-1.86201	FALSE	-1.21207	FALSE
chr1	34677894	34678044	chr1:34677894-34678044	3.29826	-2.96169	FALSE	0.714962	FALSE	0.365891	FALSE	-0.126717	FALSE	0.724744	FALSE	-1.07305	FALSE
chr1	34697482	34697538	chr1:34697482-34697538	4.10728	0.0672429	FALSE	0.549777	FALSE	2.19522	FALSE	-0.393978	FALSE	2.4212	FALSE	-0.822523	FALSE
chr1	34700414	34700467	chr1:34700414-34700467	6.88208	0.0376407	FALSE	-0.158098	FALSE	0.954507	FALSE	0.683498	FALSE	-0.330314	FALSE	0.456289	FALSE
chr1	34700861	34700878	chr1:34700861-34700878	4.16837	0.838748	FALSE	-1.52054	FALSE	1.20956	FALSE	-0.223971	FALSE	3.06653	FALSE	-0.0651957	FALSE
chr1	34701626	34701666	chr1:34701626-34701666	6.50672	0.32373	FALSE	-0.667414	FALSE	1.10314	FALSE	2.11702	FALSE	-0.362185	FALSE	0.567179	FALSE
chr1	34702871	34702946	chr1:34702871-34702946	3.54202	-1.92836	FALSE	-0.865497	FALSE	1.78168	FALSE	0.966308	FALSE	-0.749726	FALSE	1.13477	FALSE
chr1	34715690	34715741	chr1:34715690-34715741	10.9705	0.0269324	FALSE	0.0374592	FALSE	0.800078	FALSE	0.737665	FALSE	1.08073	FALSE	0.717509	FALSE
chr1	34716460	34716637	chr1:34716460-34716637	6.1588	1.55374	FALSE	-0.425389	FALSE	-0.186189	FALSE	1.30481	FALSE	0.523513	FALSE	0.482464	FALSE
chr1	34721961	34722049	chr1:34721961-34722049	8.0064	-0.243837	FALSE	0.223522	FALSE	-0.290411	FALSE	1.00051	FALSE	-0.0581618	FALSE	0.172916	FALSE
chr1	34722807	34722877	chr1:34722807-34722877	18.3274	0.440459	FALSE	-0.251175	FALSE	0.581312	FALSE	0.654428	FALSE	-0.442154	FALSE	0.565367	FALSE
chr1	34723122	34723267	chr1:34723122-34723267	11.9473	0.45592	FALSE	0.254675	FALSE	-0.919398	FALSE	-0.340086	FALSE	0.818328	FALSE	0.374951	FALSE
chr1	34723795	34723881	chr1:34723795-34723881	6.18897	-1.13779	FALSE	-0.679224	FALSE	-0.509435	FALSE	1.95389	Up	0.969702	FALSE	0.865488	FALSE
chr1	34726639	34726679	chr1:34726639-34726679	6.12353	-2.0918	FALSE	-0.719639	FALSE	-1.30139	FALSE	0.760269	FALSE	-2.17811	FALSE	1.60185	FALSE
chr1	34739700	34739837	chr1:34739700-34739837	15.077	-0.056412	FALSE	0.497399	FALSE	-1.18608	FALSE	0.132724	FALSE	-0.169678	FALSE	-0.513515	FALSE
chr1	34740546	34740728	chr1:34740546-34740728	12.2066	-2.03731	FALSE	-0.163336	FALSE	0.195379	FALSE	0.914076	FALSE	1.11229	FALSE	-0.088196	FALSE
chr1	34749597	34749703	chr1:34749597-34749703	3.51639	-1.10969	FALSE	-1.09715	FALSE	-0.231303	FALSE	-0.723146	FALSE	0.0709673	FALSE	-1.27615	FALSE
chr1	34755041	34755225	chr1:34755041-34755225	10.0046	-0.23448	FALSE	-1.0197	FALSE	0.694111	FALSE	0.911312	FALSE	-0.0842566	FALSE	0.322192	FALSE
chr1	34777696	34777817	chr1:34777696-34777817	10.4995	-0.387909	FALSE	-0.814771	FALSE	0.275491	FALSE	0.328715	FALSE	1.11705	FALSE	0.488638	FALSE
chr1	34793709	34793735	chr1:34793709-34793735	4.33523	0.775163	FALSE	0.0247766	FALSE	-0.60909	FALSE	-0.31707	FALSE	-0.123498	FALSE	0.628229	FALSE
chr1	34796540	34796754	chr1:34796540-34796754	3.25638	1.64287	FALSE	1.00086	FALSE	2.07209	FALSE	-0.0504751	FALSE	-1.35995	FALSE	2.6554	FALSE
chr1	34801651	34801736	chr1:34801651-34801736	13.5495	-0.285548	FALSE	0.250593	FALSE	-0.590988	FALSE	-0.250544	FALSE	0.558592	FALSE	0.173878	FALSE
chr1	34802460	34802670	chr1:34802460-34802670	12.4518	-0.829464	FALSE	-0.24921	FALSE	-0.62065	FALSE	-0.34968	FALSE	-0.523839	FALSE	0.495983	FALSE
chr1	34808911	34808912	chr1:34808911-34808912	1.96025	-4.1436	FALSE	1.46834	FALSE	-0.520016	FALSE	1.57842	FALSE	0.545977	FALSE	-2.66182	FALSE
chr1	34824335	34824345	chr1:34824335-34824345	1.70473	2.36514	FALSE	1.22431	FALSE	1.60977	FALSE	0.349163	FALSE	-1.58847	FALSE	0.682301	FALSE
chr1	34840169	34840180	chr1:34840169-34840180	4.8916	0.248278	FALSE	1.11751	FALSE	0.399133	FALSE	-0.531529	FALSE	0.235472	FALSE	0.371832	FALSE
chr1	34842804	34843165	chr1:34842804-34843165	6.9356	0.548853	FALSE	-0.360174	FALSE	-0.348979	FALSE	-0.450884	FALSE	-0.58439	FALSE	0.773005	FALSE
chr1	34848770	34848845	chr1:34848770-34848845	7.443	-1.51008	FALSE	-0.0768296	FALSE	-0.575861	FALSE	0.542757	FALSE	0.0524809	FALSE	1.15399	FALSE
chr1	34850011	34850019	chr1:34850011-34850019	5.73022	0.900638	FALSE	0.0419518	FALSE	-0.507414	FALSE	-1.01832	FALSE	1.02611	FALSE	-0.58725	FALSE
chr1	34851698	34851812	chr1:34851698-34851812	18.521	-0.914502	FALSE	-0.656219	FALSE	-0.236206	FALSE	0.760698	FALSE	0.585385	FALSE	0.825927	FALSE
chr1	34858859	34858882	chr1:34858859-34858882	4.37105	1.08954	FALSE	0.158892	FALSE	-0.968076	FALSE	0.381965	FALSE	-0.219863	FALSE	0.0265138	FALSE
chr1	34859916	34859998	chr1:34859916-34859998	8.48436	0.115101	FALSE	-0.222861	FALSE	-0.817899	FALSE	-0.975956	FALSE	0.0711223	FALSE	0.0692482	FALSE
chr1	34860253	34860257	chr1:34860253-34860257	4.18281	-1.17322	FALSE	-0.99389	FALSE	-0.379504	FALSE	-3.67225	Down	0.122698	FALSE	-0.908084	FALSE
chr1	34864325	34864828	chr1:34864325-34864828	6.29578	-0.152721	FALSE	-0.303402	FALSE	0.725827	FALSE	-0.0196382	FALSE	0.0572284	FALSE	0.640166	FALSE
chr1	34867353	34867435	chr1:34867353-34867435	8.8321	1.13025	FALSE	-0.73781	FALSE	-0.47228	FALSE	-1.13356	FALSE	-0.849844	FALSE	0.0144671	FALSE
chr1	34883850	34884065	chr1:34883850-34884065	5.77719	0.708781	FALSE	-3.65748	FALSE	-3.40343	Down	-5.86005	Down	-2.10256	FALSE	-3.97302	Down
chr1	34899406	34899470	chr1:34899406-34899470	2.06063	0.31972	FALSE	0.24617	FALSE	-0.347382	FALSE	-0.725132	FALSE	0.238602	FALSE	1.27822	FALSE
chr1	34930687	34930849	chr1:34930687-34930849	9.04959	-0.0484819	FALSE	-0.392895	FALSE	-0.678432	FALSE	0.414153	FALSE	0.724105	FALSE	0.00490038	FALSE
chr1	34931300	34931349	chr1:34931300-34931349	4.14606	-4.42297	FALSE	-1.09414	FALSE	-0.68771	FALSE	0.579044	FALSE	-0.126867	FALSE	2.44135	FALSE
chr1	34961777	34961844	chr1:34961777-34961844	1.87237	-0.820873	FALSE	-0.970926	FALSE	-1.71187	FALSE	-2.74341	FALSE	1.35002	FALSE	0.400176	FALSE
chr1	35022693	35022730	chr1:35022693-35022730	3.50634	0.75236	FALSE	0.531489	FALSE	-2.01924	FALSE	0.361544	FALSE	0.659521	FALSE	-2.03799	FALSE
chr1	35026568	35026592	chr1:35026568-35026592	9.90006	0.474103	FALSE	-0.239926	FALSE	0.128745	FALSE	0.107268	FALSE	1.1344	FALSE	-0.796007	FALSE
chr1	35049194	35049247	chr1:35049194-35049247	3.56891	0.146574	FALSE	0.620949	FALSE	0.599033	FALSE	2.63927	FALSE	2.21115	FALSE	0.723454	FALSE
chr1	35097721	35097810	chr1:35097721-35097810	6.46983	-0.152551	FALSE	0.454175	FALSE	0.33362	FALSE	-1.30849	FALSE	0.0573147	FALSE	0.336207	FALSE
chr1	35102170	35102260	chr1:35102170-35102260	3.03279	-0.808386	FALSE	-0.0332866	FALSE	-0.6954	FALSE	-4.9802	Down	0.638147	FALSE	-0.169849	FALSE
chr1	35136680	35136756	chr1:35136680-35136756	3.03575	1.52763	FALSE	-0.0722099	FALSE	0.602849	FALSE	-2.12224	FALSE	1.09909	FALSE	0.119414	FALSE
chr1	35139545	35139588	chr1:35139545-35139588	2.58227	-1.12611	FALSE	0.624533	FALSE	-0.697467	FALSE	-3.09967	FALSE	1.32736	FALSE	-0.860929	FALSE
chr1	35194190	35194522	chr1:35194190-35194522	20.1613	-2.47931	FALSE	-1.94466	FALSE	-2.57392	Down	-1.47003	Down	-0.63304	FALSE	-0.821138	FALSE
chr1	35213881	35214098	chr1:35213881-35214098	16.1707	0.804056	FALSE	-1.10024	FALSE	-1.09545	FALSE	-1.57094	Down	0.131211	FALSE	0.226388	FALSE
chr1	35214416	35214532	chr1:35214416-35214532	15.4607	0.840498	FALSE	-0.845642	FALSE	-1.72602	Down	-0.995605	FALSE	-0.0284304	FALSE	-0.0564438	FALSE
chr1	35215527	35215608	chr1:35215527-35215608	8.88911	-0.634687	FALSE	-0.783916	FALSE	-2.21068	Down	-3.30234	Down	-1.23355	FALSE	-1.57101	Down
chr1	35217235	35217255	chr1:35217235-35217255	11.9817	-0.361867	FALSE	0.178512	FALSE	-2.27147	Down	-0.833887	FALSE	-0.175596	FALSE	-0.73914	FALSE
chr1	35219502	35219552	chr1:35219502-35219552	5.95339	0.321411	FALSE	-2.33625	FALSE	-5.50474	Down	-4.87626	Down	-2.97561	Down	-3.03956	Down
chr1	35220480	35220659	chr1:35220480-35220659	21.5018	0.378783	FALSE	-2.00008	Down	-2.72085	Down	-2.36206	Down	-0.769919	FALSE	-0.531408	FALSE
chr1	35220929	35220973	chr1:35220929-35220973	13.3441	0.407566	FALSE	-2.72053	FALSE	-3.86254	Down	-2.93455	Down	-0.612696	FALSE	-0.524097	FALSE
chr1	35232658	35232855	chr1:35232658-35232855	24.3338	-2.40301	FALSE	-1.39931	FALSE	-4.18187	Down	-3.76143	Down	-2.06424	Down	-2.02061	Down
chr1	35261979	35262030	chr1:35261979-35262030	3.68773	1.48131	FALSE	-1.97025	FALSE	-2.03722	FALSE	-3.53963	Down	-1.09168	FALSE	-1.67484	FALSE
chr1	35266583	35266821	chr1:35266583-35266821	2.83698	-2.53813	FALSE	-0.775368	FALSE	-2.77904	FALSE	-4.56984	Down	-1.32786	FALSE	-1.89278	FALSE
chr1	35275549	35275709	chr1:35275549-35275709	13.8037	0.80908	FALSE	-0.0242998	FALSE	-0.934549	FALSE	-1.15775	Down	-1.37198	FALSE	-1.08133	FALSE
chr1	35287099	35287229	chr1:35287099-35287229	4.83406	-3.5849	FALSE	0.724141	FALSE	-2.32854	FALSE	-5.33055	Down	-2.1849	FALSE	-2.11786	FALSE
chr1	35330311	35330313	chr1:35330311-35330313	2.10412	-2.38673	FALSE	1.67028	FALSE	0.363148	FALSE	-0.364978	FALSE	-1.71741	FALSE	-0.950155	FALSE
chr1	35336453	35336472	chr1:35336453-35336472	2.75393	-3.414	FALSE	-2.40758	FALSE	-0.774735	FALSE	1.9461	FALSE	-1.14249	FALSE	1.15635	FALSE
chr1	35344188	35344405	chr1:35344188-35344405	9.72748	-0.0944018	FALSE	0.503488	FALSE	2.97836	Up	1.86394	Up	0.267514	FALSE	2.05604	Up
chr1	35344697	35344812	chr1:35344697-35344812	7.96636	-2.94107	FALSE	0.459583	FALSE	1.48633	FALSE	1.56735	FALSE	-0.310414	FALSE	-0.407322	FALSE
chr1	35359118	35359302	chr1:35359118-35359302	19.4483	0.64749	FALSE	0.788865	FALSE	0.613864	FALSE	0.590828	FALSE	-1.59248	FALSE	-0.635394	FALSE
chr1	35363493	35363599	chr1:35363493-35363599	5.25479	-0.43052	FALSE	1.94672	FALSE	1.34717	FALSE	1.8283	FALSE	-0.130118	FALSE	0.0345246	FALSE
chr1	35524076	35524186	chr1:35524076-35524186	2.04564	-2.48584	FALSE	-2.64984	FALSE	-2.44432	FALSE	1.26345	FALSE	1.79965	FALSE	0.524472	FALSE
chr1	35629660	35629790	chr1:35629660-35629790	15.7737	0.846863	FALSE	0.657148	FALSE	1.17956	FALSE	0.853167	FALSE	0.640723	FALSE	1.08573	FALSE
chr1	35630642	35630763	chr1:35630642-35630763	9.91466	0.158005	FALSE	1.22331	FALSE	1.41341	FALSE	1.34991	Up	0.0186925	FALSE	0.996614	FALSE
chr1	35630992	35631158	chr1:35630992-35631158	10.1803	0.290426	FALSE	0.31748	FALSE	1.30766	FALSE	1.29386	FALSE	0.883822	FALSE	1.13602	FALSE
chr1	35688137	35688301	chr1:35688137-35688301	5.86742	-0.950181	FALSE	0.163772	FALSE	0.71422	FALSE	1.1932	FALSE	0.234838	FALSE	0.0178042	FALSE
chr1	35754393	35754441	chr1:35754393-35754441	2.58384	1.59864	FALSE	2.28921	FALSE	0.0595134	FALSE	0.726503	FALSE	0.973469	FALSE	-0.256325	FALSE
chr1	35783497	35783570	chr1:35783497-35783570	3.13536	-1.42793	FALSE	-0.856141	FALSE	0.042918	FALSE	-2.0982	FALSE	-0.478493	FALSE	1.17094	FALSE
chr1	35808958	35809150	chr1:35808958-35809150	3.27338	2.46569	FALSE	0.377174	FALSE	-0.00188197	FALSE	1.17701	FALSE	1.3114	FALSE	1.12709	FALSE
chr1	35813756	35813804	chr1:35813756-35813804	6.32264	1.20336	FALSE	0.523825	FALSE	-0.765922	FALSE	0.274251	FALSE	0.0930838	FALSE	-0.442839	FALSE
chr1	35829120	35829133	chr1:35829120-35829133	3.84852	-0.509846	FALSE	-0.181928	FALSE	0.205615	FALSE	0.268215	FALSE	2.44626	FALSE	-0.443603	FALSE
chr1	35839607	35839776	chr1:35839607-35839776	27.0901	0.0879316	FALSE	-0.751752	FALSE	0.413877	FALSE	-0.20962	FALSE	0.72658	FALSE	0.875059	Up
chr1	35841772	35841964	chr1:35841772-35841964	30.8955	-1.77323	FALSE	-3.92273	Down	-3.79443	Down	-5.39894	Down	-0.373032	FALSE	0.117192	FALSE
chr1	35843800	35843849	chr1:35843800-35843849	6.26052	0	FALSE	-2.18774	FALSE	-3.41071	Down	-3.37315	Down	-0.100827	FALSE	-0.221668	FALSE
chr1	35846616	35846806	chr1:35846616-35846806	12.6482	0.733487	FALSE	-0.490325	FALSE	-0.894128	FALSE	-1.21568	Down	-0.13925	FALSE	-0.0685274	FALSE
chr1	35856347	35856513	chr1:35856347-35856513	5.77447	-2.18354	FALSE	-1.04316	FALSE	-1.28169	FALSE	-1.41793	FALSE	0.153833	FALSE	0.233461	FALSE
chr1	35858480	35858728	chr1:35858480-35858728	29.1791	-0.181049	FALSE	-0.805221	FALSE	0.435724	FALSE	0.200318	FALSE	0.243961	FALSE	0.621392	FALSE
chr1	35862584	35862657	chr1:35862584-35862657	4.71838	-1.10969	FALSE	-2.64834	FALSE	-0.980215	FALSE	-1.59939	FALSE	1.78693	FALSE	-0.341639	FALSE
chr1	35864475	35864632	chr1:35864475-35864632	3.09042	0.831691	FALSE	-2.54257	FALSE	-0.714515	FALSE	-0.967297	FALSE	0.0726891	FALSE	-1.13826	FALSE
chr1	35869839	35869997	chr1:35869839-35869997	38.5033	0.172332	FALSE	-0.331567	FALSE	0.0226316	FALSE	-0.377177	FALSE	-0.0232797	FALSE	-0.202844	FALSE
chr1	35871055	35871212	chr1:35871055-35871212	15.6569	0.340057	FALSE	-0.0521746	FALSE	0.47476	FALSE	0.0930286	FALSE	-0.409791	FALSE	0.712784	FALSE
chr1	35871562	35871781	chr1:35871562-35871781	36.9596	0.3251	FALSE	-0.171265	FALSE	0.380095	FALSE	0.118689	FALSE	0.142095	FALSE	0.50284	FALSE
chr1	35878300	35878511	chr1:35878300-35878511	3.9337	-2.91879	FALSE	-2.34366	FALSE	-1.35116	FALSE	-3.18992	Down	-3.069	Down	-1.58203	FALSE
chr1	35881700	35881781	chr1:35881700-35881781	33.5968	0.51437	FALSE	-0.211146	FALSE	0.591585	FALSE	0.214882	FALSE	-0.100179	FALSE	0.224677	FALSE
chr1	35884276	35884279	chr1:35884276-35884279	4.77707	1.60565	FALSE	-2.07888	FALSE	-1.17802	FALSE	-1.0508	FALSE	0.107308	FALSE	0.372392	FALSE
chr1	35895785	35895849	chr1:35895785-35895849	5.74746	-0.895965	FALSE	-0.716365	FALSE	0.61835	FALSE	-0.612849	FALSE	0.117931	FALSE	-0.0614168	FALSE
chr1	35904139	35904362	chr1:35904139-35904362	5.24224	2.36257	FALSE	-0.815804	FALSE	1.07896	FALSE	-2.2307	FALSE	0.567322	FALSE	0.888703	FALSE
chr1	35913737	35913763	chr1:35913737-35913763	1.96391	1.28868	FALSE	-2.22435	FALSE	-0.803471	FALSE	-1.47305	FALSE	-0.40448	FALSE	0.904034	FALSE
chr1	35916781	35916820	chr1:35916781-35916820	6.64677	-1.12036	FALSE	0.347448	FALSE	-2.04244	FALSE	-3.2464	Down	0.615173	FALSE	-0.706082	FALSE
chr1	35917766	35918083	chr1:35917766-35918083	7.46751	-0.76479	FALSE	0.124696	FALSE	1.10443	FALSE	1.04042	FALSE	1.44692	FALSE	0.223706	FALSE
chr1	35931201	35931399	chr1:35931201-35931399	14.8902	2.53186	FALSE	1.12399	FALSE	-1.02874	FALSE	-0.787479	FALSE	-0.0221482	FALSE	0.385024	FALSE
chr1	35940324	35940479	chr1:35940324-35940479	12.2294	0.756329	FALSE	0.528312	FALSE	-0.914572	FALSE	-1.02603	FALSE	0.475421	FALSE	0.485749	FALSE
chr1	35943151	35943218	chr1:35943151-35943218	7.35231	0.569743	FALSE	-1.23865	FALSE	-1.80758	FALSE	-2.82237	Down	0.814619	FALSE	0.727933	FALSE
chr1	35944437	35944532	chr1:35944437-35944532	8.99533	-0.792965	FALSE	-1.03995	FALSE	-4.25116	Down	-3.69772	Down	-0.207246	FALSE	-0.982251	FALSE
chr1	35951905	35952017	chr1:35951905-35952017	14.9517	0.77668	FALSE	-0.558934	FALSE	-1.02518	FALSE	-1.07947	FALSE	0.364446	FALSE	0.505265	FALSE
chr1	35952877	35952931	chr1:35952877-35952931	8.81745	0.239014	FALSE	-0.328531	FALSE	0.0249196	FALSE	0.325979	FALSE	0.653921	FALSE	1.36196	FALSE
chr1	35953819	35953826	chr1:35953819-35953826	4.00496	-3.19513	FALSE	0.842144	FALSE	-0.264963	FALSE	0.959399	FALSE	1.48262	FALSE	1.01726	FALSE
chr1	35954169	35954257	chr1:35954169-35954257	14.4915	-0.773412	FALSE	-0.297135	FALSE	-1.10881	FALSE	-0.459391	FALSE	0.274329	FALSE	0.448321	FALSE
chr1	35957597	35957675	chr1:35957597-35957675	36.7847	-0.0678492	FALSE	0.115557	FALSE	-1.29422	Down	-0.979074	Down	-0.41527	FALSE	0.0570719	FALSE
chr1	35962021	35962217	chr1:35962021-35962217	28.3124	1.08946	FALSE	-1.03343	FALSE	0.194966	FALSE	-0.315426	FALSE	0.879835	FALSE	0.456923	FALSE
chr1	35963600	35963729	chr1:35963600-35963729	8.28597	-0.374861	FALSE	-0.119895	FALSE	-1.26837	FALSE	-1.9939	Down	0.0964654	FALSE	0.174498	FALSE
chr1	35970041	35970200	chr1:35970041-35970200	23.9283	0.0474778	FALSE	-0.191436	FALSE	-0.410598	FALSE	0.0225761	FALSE	0.265988	FALSE	0.8661	FALSE
chr1	35975855	35976108	chr1:35975855-35976108	9.33076	-0.277967	FALSE	-0.49214	FALSE	0.959326	FALSE	0.434664	FALSE	1.67436	FALSE	0.403893	FALSE
chr1	35977335	35977399	chr1:35977335-35977399	6.70282	1.10265	FALSE	-1.19015	FALSE	1.57847	FALSE	1.96581	FALSE	-0.188244	FALSE	1.24472	FALSE
chr1	35978939	35979030	chr1:35978939-35979030	8.37529	-1.81873	FALSE	-0.837361	FALSE	-0.989246	FALSE	-2.20891	Down	-0.448398	FALSE	-1.15165	FALSE
chr1	35985514	35986191	chr1:35985514-35986191	7.79214	0.743799	FALSE	0.403204	FALSE	1.1715	FALSE	0.516462	FALSE	-1.43549	FALSE	1.01551	FALSE
chr1	35986432	35986544	chr1:35986432-35986544	25.6022	0.377077	FALSE	-0.314007	FALSE	0.430502	FALSE	0.0731589	FALSE	-0.354252	FALSE	0.496454	FALSE
chr1	35990984	35990999	chr1:35990984-35990999	3.87549	1.03049	FALSE	0.554129	FALSE	0.836258	FALSE	-3.64085	FALSE	-0.0489535	FALSE	0.797479	FALSE
chr1	36000164	36000254	chr1:36000164-36000254	6.6177	-0.411963	FALSE	0.34559	FALSE	-1.08637	FALSE	0.021877	FALSE	0.611075	FALSE	-0.308919	FALSE
chr1	36001889	36002160	chr1:36001889-36002160	47.0094	0.758193	FALSE	0.245337	FALSE	0.105898	FALSE	-0.148526	FALSE	0.381173	FALSE	0.64422	FALSE
chr1	36002831	36002960	chr1:36002831-36002960	17.12	-0.0630767	FALSE	-0.0195375	FALSE	0.615858	FALSE	0.634161	FALSE	-0.801046	FALSE	0.743402	FALSE
chr1	36008145	36008163	chr1:36008145-36008163	4.71517	2.10407	FALSE	-0.443062	FALSE	1.32317	FALSE	-0.750069	FALSE	-0.256398	FALSE	-0.144909	FALSE
chr1	36009027	36009061	chr1:36009027-36009061	4.64321	-2.54097	FALSE	-0.467656	FALSE	-2.07738	FALSE	-2.31689	FALSE	1.50185	FALSE	-0.493311	FALSE
chr1	36012244	36012342	chr1:36012244-36012342	12.3664	-0.187872	FALSE	-1.77232	FALSE	-0.965258	FALSE	-2.31554	Down	0.295701	FALSE	0.400281	FALSE
chr1	36012584	36012655	chr1:36012584-36012655	11.0785	-0.727356	FALSE	-0.909593	FALSE	-0.780606	FALSE	-1.09528	FALSE	0.562422	FALSE	0.54062	FALSE
chr1	36013646	36013987	chr1:36013646-36013987	28.8595	-0.203121	FALSE	-0.345418	FALSE	-0.615161	FALSE	-0.762754	Down	0.0834307	FALSE	-0.174294	FALSE
chr1	36014518	36014629	chr1:36014518-36014629	15.7044	-0.285739	FALSE	-1.05675	FALSE	-1.88769	Down	-3.2844	Down	-1.79592	Down	-1.43844	Down
chr1	36017290	36017447	chr1:36017290-36017447	61.332	-0.328255	FALSE	-0.0106196	FALSE	0.0998008	FALSE	-0.492906	FALSE	-0.212822	FALSE	0.194798	FALSE
chr1	36020159	36020579	chr1:36020159-36020579	17.6602	-0.453615	FALSE	-0.527486	FALSE	0.510283	FALSE	0.564017	FALSE	-0.0833363	FALSE	0.528559	FALSE
chr1	36030332	36030740	chr1:36030332-36030740	10.9887	-0.639637	FALSE	1.06491	FALSE	0.187252	FALSE	0.131494	FALSE	0.67402	FALSE	-0.590824	FALSE
chr1	36038455	36038458	chr1:36038455-36038458	2.25947	0.596507	FALSE	0.831104	FALSE	-1.35899	FALSE	-1.21631	FALSE	-0.348677	FALSE	1.80435	FALSE
chr1	36040620	36040661	chr1:36040620-36040661	3.56097	0.825336	FALSE	-0.612384	FALSE	2.76418	FALSE	-0.913749	FALSE	2.3936	FALSE	-0.329597	FALSE
chr1	36042561	36042706	chr1:36042561-36042706	4.08032	1.42649	FALSE	0.0183765	FALSE	-4.94456	Down	-4.60436	Down	-2.53005	FALSE	-2.62962	Down
chr1	36043932	36044235	chr1:36043932-36044235	7.55905	-0.401901	FALSE	0.843914	FALSE	-0.496202	FALSE	-0.585743	FALSE	0.183591	FALSE	-0.069525	FALSE
chr1	36049677	36049734	chr1:36049677-36049734	4.83841	0.548202	FALSE	0.612504	FALSE	-1.34357	FALSE	-1.5268	FALSE	-1.58265	FALSE	-0.585048	FALSE
chr1	36054710	36054896	chr1:36054710-36054896	58.5903	-0.0146941	FALSE	-0.394419	FALSE	-0.411538	FALSE	-0.515994	FALSE	-0.0106217	FALSE	0.0462401	FALSE
chr1	36055994	36056067	chr1:36055994-36056067	18.5412	-0.149774	FALSE	-0.0736654	FALSE	-0.752113	FALSE	-0.389071	FALSE	0.201594	FALSE	0.734287	FALSE
chr1	36060084	36060211	chr1:36060084-36060211	20.7386	-1.00646	FALSE	-0.774739	FALSE	0.464867	FALSE	0.608267	FALSE	-0.383237	FALSE	0.498917	FALSE
chr1	36060429	36060806	chr1:36060429-36060806	33.7426	-0.437989	FALSE	-0.436773	FALSE	0.560204	FALSE	0.690367	FALSE	0.030711	FALSE	0.774138	FALSE
chr1	36061420	36061568	chr1:36061420-36061568	38.6764	-0.234991	FALSE	0.159742	FALSE	-0.162097	FALSE	-0.428289	FALSE	-0.272462	FALSE	-0.337908	FALSE
chr1	36062208	36062291	chr1:36062208-36062291	34.405	0.206147	FALSE	-0.0649539	FALSE	0.800672	FALSE	0.101575	FALSE	0.777972	FALSE	0.399002	FALSE
chr1	36068164	36068364	chr1:36068164-36068364	33.2555	0.0449927	FALSE	-0.0345887	FALSE	-0.151869	FALSE	0.24339	FALSE	-0.00433672	FALSE	0.189524	FALSE
chr1	36069643	36069662	chr1:36069643-36069662	12.7594	-0.631512	FALSE	0.149386	FALSE	0.103665	FALSE	-0.405099	FALSE	-1.59356	FALSE	0.696431	FALSE
chr1	36074349	36074508	chr1:36074349-36074508	30.7406	-0.0772737	FALSE	0.174674	FALSE	-0.36928	FALSE	-0.380433	FALSE	0.658079	FALSE	-0.112721	FALSE
chr1	36077174	36077573	chr1:36077174-36077573	66.3929	0.506679	FALSE	-0.0212402	FALSE	0.745246	FALSE	0.707808	FALSE	0.202983	FALSE	0.490802	FALSE
chr1	36091407	36091478	chr1:36091407-36091478	20.7805	0.185895	FALSE	0.278856	FALSE	0.639504	FALSE	0.453317	FALSE	0.0101027	FALSE	0.751432	FALSE
chr1	36095605	36095961	chr1:36095605-36095961	17.1034	0.107527	FALSE	-0.032651	FALSE	0.47125	FALSE	0.299347	FALSE	0.348376	FALSE	0.441861	FALSE
chr1	36100528	36100645	chr1:36100528-36100645	17.7017	-0.176519	FALSE	-0.44405	FALSE	0.799372	FALSE	2.04513	Up	0.661358	FALSE	1.44852	Up
chr1	36101276	36101368	chr1:36101276-36101368	12.1652	0.320747	FALSE	0.576102	FALSE	2.0274	Up	1.07864	FALSE	0.162713	FALSE	1.41807	FALSE
chr1	36105416	36105591	chr1:36105416-36105591	9.97487	0.439852	FALSE	-0.0296508	FALSE	-0.705825	FALSE	0.765805	FALSE	0.80019	FALSE	0.860852	FALSE
chr1	36116730	36116791	chr1:36116730-36116791	3.76776	1.76138	FALSE	0.428891	FALSE	0.875247	FALSE	0.516176	FALSE	0.0163987	FALSE	1.16383	FALSE
chr1	36118101	36118197	chr1:36118101-36118197	3.15919	-1.44747	FALSE	-0.165676	FALSE	-0.102126	FALSE	0.0582523	FALSE	1.96197	FALSE	1.90981	FALSE
chr1	36119534	36119686	chr1:36119534-36119686	19.2302	0.162484	FALSE	-0.0690065	FALSE	1.56876	Up	1.058	FALSE	0.567137	FALSE	0.983053	FALSE
chr1	36120440	36120530	chr1:36120440-36120530	10.7364	-0.832623	FALSE	-0.393672	FALSE	-0.142108	FALSE	1.81555	Up	-0.109956	FALSE	1.44926	FALSE
chr1	36134726	36134809	chr1:36134726-36134809	7.60763	-0.14614	FALSE	0.153968	FALSE	0.914086	FALSE	0.293881	FALSE	1.2041	FALSE	0.949411	FALSE
chr1	36149412	36149626	chr1:36149412-36149626	5.03754	0.384553	FALSE	-0.330123	FALSE	1.17606	FALSE	1.15102	FALSE	-0.748017	FALSE	1.06493	FALSE
chr1	36162848	36162923	chr1:36162848-36162923	4.66313	-1.70363	FALSE	-1.70901	FALSE	-0.413624	FALSE	-0.552723	FALSE	0.355543	FALSE	-0.319636	FALSE
chr1	36178737	36178824	chr1:36178737-36178824	4.93923	0.245195	FALSE	0.67563	FALSE	0.615962	FALSE	-1.69541	FALSE	-0.303208	FALSE	1.29953	FALSE
chr1	36179142	36179164	chr1:36179142-36179164	2.64422	0.524827	FALSE	-0.102017	FALSE	1.67393	FALSE	-1.49963	FALSE	1.89763	FALSE	0.867642	FALSE
chr1	36188386	36188403	chr1:36188386-36188403	3.12927	0.462909	FALSE	1.02217	FALSE	-1.24801	FALSE	-0.369743	FALSE	-1.41736	FALSE	0.510845	FALSE
chr1	36199744	36199821	chr1:36199744-36199821	2.93276	0.317874	FALSE	-0.186408	FALSE	-1.82971	FALSE	0.66059	FALSE	2.33351	FALSE	0.0949392	FALSE
chr1	36212594	36212597	chr1:36212594-36212597	3.78036	-1.16261	FALSE	-0.383236	FALSE	-2.70443	FALSE	-0.167489	FALSE	-0.395664	FALSE	1.43304	FALSE
chr1	36240415	36240539	chr1:36240415-36240539	10.4473	1.37571	FALSE	0.302979	FALSE	-1.00265	FALSE	-0.317053	FALSE	-1.67514	FALSE	-1.33328	FALSE
chr1	36241367	36241402	chr1:36241367-36241402	7.75795	-0.177924	FALSE	0.109915	FALSE	0.578951	FALSE	1.57826	Up	0.179959	FALSE	0.166139	FALSE
chr1	36244083	36244454	chr1:36244083-36244454	24.894	-0.0155527	FALSE	-0.014628	FALSE	0.00533962	FALSE	-0.158368	FALSE	0.725586	FALSE	-0.00958059	FALSE
chr1	36249718	36250123	chr1:36249718-36250123	20.1603	-0.00939805	FALSE	0.0430222	FALSE	0.914765	FALSE	1.30768	Up	0.274105	FALSE	0.885046	FALSE
chr1	36251614	36251655	chr1:36251614-36251655	7.83008	0.6916	FALSE	0.573131	FALSE	-0.738168	FALSE	-1.98915	Down	0.456479	FALSE	-1.87263	Down
chr1	36254735	36254829	chr1:36254735-36254829	22.9178	0.608441	FALSE	-0.156615	FALSE	0.0599883	FALSE	0.98237	Up	-0.115746	FALSE	0.178261	FALSE
chr1	36265482	36265548	chr1:36265482-36265548	2.61993	1.03712	FALSE	-1.83683	FALSE	2.12203	FALSE	-0.288386	FALSE	0.379576	FALSE	-0.964384	FALSE
chr1	36278334	36278626	chr1:36278334-36278626	7.8123	0.433935	FALSE	-0.227182	FALSE	2.59515	Up	2.43817	Up	0.602285	FALSE	1.36965	FALSE
chr1	36285919	36286208	chr1:36285919-36286208	4.84273	0.513002	FALSE	-0.736344	FALSE	0.452352	FALSE	1.63274	FALSE	1.15142	FALSE	1.29921	FALSE
chr1	36306099	36306349	chr1:36306099-36306349	6.22032	-1.71993	FALSE	-1.31241	FALSE	-0.0710432	FALSE	0.922247	FALSE	-1.3262	FALSE	0.822227	FALSE
chr1	36307563	36307819	chr1:36307563-36307819	20.9774	-0.20738	FALSE	-0.287936	FALSE	0.115262	FALSE	0.0129447	FALSE	0.16545	FALSE	-0.44828	FALSE
chr1	36308784	36308835	chr1:36308784-36308835	6.34277	-0.799363	FALSE	-0.532997	FALSE	-0.517506	FALSE	-0.0376443	FALSE	-0.900546	FALSE	0.320342	FALSE
chr1	36315080	36315235	chr1:36315080-36315235	34.1121	-0.357229	FALSE	-0.450703	FALSE	-0.531167	FALSE	-0.438619	FALSE	-0.33018	FALSE	-0.000246981	FALSE
chr1	36321961	36321965	chr1:36321961-36321965	5.09998	-0.0927371	FALSE	-0.295839	FALSE	-0.0749546	FALSE	0.674056	FALSE	1.2039	FALSE	-0.431374	FALSE
chr1	36324236	36324279	chr1:36324236-36324279	3.37951	0.978168	FALSE	-1.81421	FALSE	-1.65786	FALSE	0.637994	FALSE	-1.42016	FALSE	-0.935412	FALSE
chr1	36335978	36336015	chr1:36335978-36336015	5.5758	0.188165	FALSE	0.691549	FALSE	0.0453528	FALSE	1.32525	FALSE	-0.189624	FALSE	0.486424	FALSE
chr1	36336346	36336614	chr1:36336346-36336614	19.3266	0.153145	FALSE	0.975161	FALSE	0.840879	FALSE	1.45662	Up	0.307863	FALSE	1.19647	FALSE
chr1	36363584	36363772	chr1:36363584-36363772	6.54138	0.41359	FALSE	-0.964705	FALSE	-0.712374	FALSE	0.757771	FALSE	-0.0814226	FALSE	-0.322778	FALSE
chr1	36368867	36368878	chr1:36368867-36368878	5.30032	0.604714	FALSE	0.619072	FALSE	-0.430066	FALSE	-0.245327	FALSE	0.298992	FALSE	1.13085	FALSE
chr1	36369163	36369318	chr1:36369163-36369318	7.75692	0.755485	FALSE	-0.142512	FALSE	0.143892	FALSE	-1.2577	FALSE	0.555303	FALSE	-0.340797	FALSE
chr1	36372065	36372219	chr1:36372065-36372219	10.7118	0.206982	FALSE	0.154072	FALSE	-0.097	FALSE	0.917156	FALSE	-0.51121	FALSE	-0.698538	FALSE
chr1	36413261	36413279	chr1:36413261-36413279	7.60068	0.922878	FALSE	0.232358	FALSE	-0.216653	FALSE	0.857095	FALSE	1.54437	FALSE	1.47341	FALSE
chr1	36417770	36417802	chr1:36417770-36417802	2.97288	-0.621587	FALSE	0.722287	FALSE	-0.245622	FALSE	-1.13184	FALSE	1.4334	FALSE	-0.925813	FALSE
chr1	36421162	36421250	chr1:36421162-36421250	2.92048	-0.468724	FALSE	-0.0919995	FALSE	-0.24797	FALSE	0.733195	FALSE	2.26674	FALSE	-2.28282	FALSE
chr1	36431552	36431658	chr1:36431552-36431658	3.70532	0.159361	FALSE	-0.0307901	FALSE	-1.60547	FALSE	2.15289	FALSE	1.46283	FALSE	0.132971	FALSE
chr1	36445281	36445400	chr1:36445281-36445400	35.8256	-0.240025	FALSE	-0.0124621	FALSE	0.127765	FALSE	-0.401245	FALSE	0.251246	FALSE	0.0222863	FALSE
chr1	36464049	36464118	chr1:36464049-36464118	4.95256	1.50336	FALSE	0.389864	FALSE	1.50551	FALSE	2.72905	FALSE	0.1094	FALSE	1.88936	FALSE
chr1	36465954	36466206	chr1:36465954-36466206	19.1272	0.442084	FALSE	1.02274	FALSE	1.65647	FALSE	0.835045	FALSE	-2.08825	FALSE	-0.537866	FALSE
chr1	36467530	36467673	chr1:36467530-36467673	14.9852	0.666271	FALSE	0.43092	FALSE	1.89433	Up	-0.619859	FALSE	0.203538	FALSE	-0.795544	FALSE
chr1	36471416	36471665	chr1:36471416-36471665	16.2469	0.0285931	FALSE	-0.317264	FALSE	0.443402	FALSE	-0.470113	FALSE	0.0341555	FALSE	0.187127	FALSE
chr1	36476604	36476615	chr1:36476604-36476615	4.57047	-0.893095	FALSE	-0.081891	FALSE	-0.0371408	FALSE	-0.335306	FALSE	0.849667	FALSE	1.0695	FALSE
chr1	36476894	36476995	chr1:36476894-36476995	18.7656	-0.147703	FALSE	-0.339969	FALSE	-0.14121	FALSE	0.427658	FALSE	0.989737	FALSE	0.97295	FALSE
chr1	36477355	36477486	chr1:36477355-36477486	15.2139	0.239521	FALSE	-0.0282261	FALSE	0.771253	FALSE	2.1992	Up	2.50362	FALSE	0.733098	FALSE
chr1	36482580	36482684	chr1:36482580-36482684	4.33507	0.8944	FALSE	-0.226957	FALSE	-0.231633	FALSE	1.91725	FALSE	-0.503403	FALSE	0.0951604	FALSE
chr1	36492551	36492637	chr1:36492551-36492637	10.5918	-0.0141178	FALSE	0.475528	FALSE	0.841389	FALSE	1.16012	FALSE	0.374885	FALSE	-0.30006	FALSE
chr1	36493389	36493536	chr1:36493389-36493536	4.27801	0.524554	FALSE	0.40496	FALSE	-1.09449	FALSE	-0.00787064	FALSE	4.00598	FALSE	0.73785	FALSE
chr1	36501264	36501531	chr1:36501264-36501531	5.61252	-0.0854262	FALSE	0.348849	FALSE	0.919621	FALSE	0.238625	FALSE	0.53678	FALSE	0.715873	FALSE
chr1	36511422	36511476	chr1:36511422-36511476	9.44315	0.41556	FALSE	-0.09643	FALSE	0.312032	FALSE	-0.321622	FALSE	-0.436748	FALSE	-0.0811576	FALSE
chr1	36511680	36511902	chr1:36511680-36511902	45.671	-0.515713	FALSE	-0.0951222	FALSE	0.309329	FALSE	-0.225753	FALSE	-0.0816814	FALSE	0.62795	FALSE
chr1	36512253	36512324	chr1:36512253-36512324	5.41712	-1.12231	FALSE	0.811083	FALSE	-0.816128	FALSE	-1.16675	FALSE	-0.398517	FALSE	-0.0152202	FALSE
chr1	36533311	36533475	chr1:36533311-36533475	9.56232	0.365605	FALSE	0.591682	FALSE	0.72676	FALSE	1.62305	Up	0.305263	FALSE	0.819065	FALSE
chr1	36547191	36547376	chr1:36547191-36547376	69.4382	-0.271294	FALSE	0.1593	FALSE	0.0708282	FALSE	0.174068	FALSE	0.211031	FALSE	0.253266	FALSE
chr1	36557809	36557969	chr1:36557809-36557969	3.3504	-2.58871	FALSE	0.545956	FALSE	0.534575	FALSE	0.0751843	FALSE	-0.560766	FALSE	-0.214317	FALSE
chr1	36558239	36558391	chr1:36558239-36558391	16.8675	0.853342	FALSE	-0.496401	FALSE	-0.655399	FALSE	-0.635644	FALSE	0.119934	FALSE	0.652434	FALSE
chr1	36563131	36563155	chr1:36563131-36563155	3.80038	-0.902548	FALSE	0.667845	FALSE	1.84591	FALSE	0.78591	FALSE	1.23276	FALSE	0.700695	FALSE
chr1	36570610	36570790	chr1:36570610-36570790	12.3329	0.0616789	FALSE	0.518775	FALSE	0.752836	FALSE	0.906408	FALSE	1.41534	FALSE	2.09378	Up
chr1	36577228	36577492	chr1:36577228-36577492	5.2244	0.710047	FALSE	-0.783626	FALSE	0.230299	FALSE	1.50569	FALSE	1.73366	FALSE	0.526884	FALSE
chr1	36577738	36577809	chr1:36577738-36577809	8.1241	-1.77581	FALSE	0.138367	FALSE	0.165986	FALSE	1.40638	FALSE	1.48273	FALSE	0.320779	FALSE
chr1	36580535	36580615	chr1:36580535-36580615	12.5151	0.569156	FALSE	0.077242	FALSE	-0.191722	FALSE	-0.374105	FALSE	0.0580558	FALSE	-0.139455	FALSE
chr1	36583517	36583655	chr1:36583517-36583655	37.1828	0.5547	FALSE	-0.0151416	FALSE	-0.455988	FALSE	0.14775	FALSE	-0.324696	FALSE	-0.00247294	FALSE
chr1	36594228	36594292	chr1:36594228-36594292	3.23433	1.03924	FALSE	-0.242624	FALSE	1.059	FALSE	0.0357928	FALSE	2.16075	FALSE	0.337105	FALSE
chr1	36594743	36594867	chr1:36594743-36594867	16.7808	0.0562366	FALSE	0.167838	FALSE	0.937617	FALSE	-0.102609	FALSE	0.740726	FALSE	0.638839	FALSE
chr1	36612043	36612157	chr1:36612043-36612157	8.33272	0.777607	FALSE	0.0459751	FALSE	-0.596746	FALSE	-0.348122	FALSE	0.0695945	FALSE	-1.19299	FALSE
chr1	36613531	36613598	chr1:36613531-36613598	3.81552	0.597126	FALSE	0.756731	FALSE	-2.29201	FALSE	-2.12701	FALSE	-0.0949322	FALSE	-0.0233465	FALSE
chr1	36626226	36626413	chr1:36626226-36626413	18.436	-0.187728	FALSE	0.557354	FALSE	-0.325827	FALSE	0.293495	FALSE	-0.0238376	FALSE	-0.211531	FALSE
chr1	36635092	36635177	chr1:36635092-36635177	9.68344	0.183984	FALSE	0.0729389	FALSE	-0.399187	FALSE	0.996911	FALSE	0.360842	FALSE	-0.569182	FALSE
chr1	36636649	36636758	chr1:36636649-36636758	8.73418	-0.722531	FALSE	-0.0169567	FALSE	-1.12097	FALSE	-0.482955	FALSE	-0.394535	FALSE	-0.685811	FALSE
chr1	36644006	36644198	chr1:36644006-36644198	5.14325	-0.724075	FALSE	-0.268426	FALSE	-0.15053	FALSE	0.329795	FALSE	0.63133	FALSE	-0.536527	FALSE
chr1	36650725	36650768	chr1:36650725-36650768	4.14199	0.35486	FALSE	0.942344	FALSE	-2.7646	FALSE	2.85223	FALSE	-0.683729	FALSE	0.12813	FALSE
chr1	36658214	36658278	chr1:36658214-36658278	4.71589	0.127167	FALSE	0.248173	FALSE	-0.260826	FALSE	-0.178748	FALSE	3.662	FALSE	0.633557	FALSE
chr1	36659217	36659262	chr1:36659217-36659262	4.76007	1.08744	FALSE	1.69097	FALSE	1.15249	FALSE	-1.43431	FALSE	1.38655	FALSE	0.253436	FALSE
chr1	36660112	36660139	chr1:36660112-36660139	3.24782	-0.191944	FALSE	2.75906	FALSE	0.853522	FALSE	1.14612	FALSE	1.36876	FALSE	-0.141462	FALSE
chr1	36664578	36664900	chr1:36664578-36664900	9.00673	-0.684127	FALSE	-0.00361223	FALSE	0.200647	FALSE	1.55434	FALSE	0.488385	FALSE	0.959808	FALSE
chr1	36682732	36682787	chr1:36682732-36682787	4.27549	-1.44503	FALSE	0.13351	FALSE	-0.299776	FALSE	-0.712356	FALSE	-0.166063	FALSE	0.127416	FALSE
chr1	36683195	36683275	chr1:36683195-36683275	2.22136	0.725647	FALSE	-0.373371	FALSE	-1.2633	FALSE	-2.28855	FALSE	-0.034107	FALSE	-1.21112	FALSE
chr1	36684242	36684388	chr1:36684242-36684388	16.6323	0.406471	FALSE	-0.0900095	FALSE	0.584225	FALSE	0.686966	FALSE	0.0931428	FALSE	-0.327274	FALSE
chr1	36691328	36691531	chr1:36691328-36691531	25.0641	0.85202	FALSE	0.213779	FALSE	-0.0132576	FALSE	-0.161585	FALSE	0.0780956	FALSE	0.3988	FALSE
chr1	36707979	36708101	chr1:36707979-36708101	12.1503	1.22254	FALSE	-0.537403	FALSE	-1.09819	FALSE	-1.18605	FALSE	-0.287322	FALSE	-1.27575	FALSE
chr1	36709936	36710148	chr1:36709936-36710148	41.947	0.293118	FALSE	-0.175707	FALSE	0.370967	FALSE	-0.105107	FALSE	0.387809	FALSE	-0.0678261	FALSE
chr1	36721068	36721358	chr1:36721068-36721358	6.4241	1.08347	FALSE	-0.0599191	FALSE	-0.14834	FALSE	0.933928	FALSE	-0.162064	FALSE	-0.312432	FALSE
chr1	36730432	36730546	chr1:36730432-36730546	2.74163	-0.28881	FALSE	-1.64489	FALSE	2.03445	FALSE	-1.69502	FALSE	-0.89083	FALSE	-2.47567	FALSE
chr1	36731899	36732037	chr1:36731899-36732037	5.21568	-0.285199	FALSE	-0.867326	FALSE	-0.498357	FALSE	-0.485395	FALSE	-0.97583	FALSE	-0.213086	FALSE
chr1	36732247	36732340	chr1:36732247-36732340	4.23285	-0.1229	FALSE	-0.276352	FALSE	1.05628	FALSE	-1.05318	FALSE	0.475711	FALSE	0.110719	FALSE
chr1	36732766	36732774	chr1:36732766-36732774	1.38182	1.31249	FALSE	-0.0415838	FALSE	1.65127	FALSE	2.84779	FALSE	-1.73733	FALSE	0	FALSE
chr1	36747547	36747566	chr1:36747547-36747566	2.60559	0	FALSE	-2.63262	FALSE	-1.28338	FALSE	-0.579848	FALSE	0.287652	FALSE	-0.551426	FALSE
chr1	36756784	36756875	chr1:36756784-36756875	5.5041	0.504901	FALSE	1.29511	FALSE	1.88274	FALSE	-1.35084	FALSE	-0.709487	FALSE	0.329462	FALSE
chr1	36757634	36757749	chr1:36757634-36757749	20.9353	0.0180222	FALSE	0.0405733	FALSE	1.65359	Up	1.82398	Up	1.37886	FALSE	0.545204	FALSE
chr1	36758627	36758730	chr1:36758627-36758730	6.6058	0.103467	FALSE	0.724882	FALSE	0.760865	FALSE	0.0127182	FALSE	-0.271122	FALSE	-1.27144	FALSE
chr1	36768605	36768767	chr1:36768605-36768767	11.4323	0.332434	FALSE	0.460488	FALSE	0.85711	FALSE	0.828052	FALSE	0.266028	FALSE	0.0863986	FALSE
chr1	36771155	36771342	chr1:36771155-36771342	14.4461	0.0456138	FALSE	-0.135358	FALSE	0.331017	FALSE	0.191776	FALSE	0.324855	FALSE	-0.446029	FALSE
chr1	36777331	36777382	chr1:36777331-36777382	2.25296	0.556936	FALSE	0.663978	FALSE	-3.07214	FALSE	0.129849	FALSE	-0.26972	FALSE	0.993658	FALSE
chr1	36784828	36784941	chr1:36784828-36784941	11.6384	0.180773	FALSE	-0.349297	FALSE	-0.542189	FALSE	-0.475791	FALSE	-0.644566	FALSE	-1.31765	FALSE
chr1	36800616	36800637	chr1:36800616-36800637	3.30028	0.378366	FALSE	-0.662478	FALSE	-1.10103	FALSE	1.30662	FALSE	0.269693	FALSE	1.66992	FALSE
chr1	36804195	36804530	chr1:36804195-36804530	2.60451	1.27607	FALSE	-0.199031	FALSE	-2.44079	FALSE	-0.321032	FALSE	-0.150799	FALSE	0.386225	FALSE
chr1	36814515	36814541	chr1:36814515-36814541	2.83652	-0.425184	FALSE	-1.06936	FALSE	-3.65488	FALSE	-0.118743	FALSE	-2.51162	FALSE	0.432742	FALSE
chr1	36831075	36831087	chr1:36831075-36831087	2.79317	2.47051	FALSE	-1.22425	FALSE	-1.46277	FALSE	-0.83556	FALSE	-0.861757	FALSE	0.840955	FALSE
chr1	36854220	36854382	chr1:36854220-36854382	2.96741	-3.56353	FALSE	-2.60044	FALSE	-0.277436	FALSE	0.31191	FALSE	0.666238	FALSE	-1.49109	FALSE
chr1	36865268	36865356	chr1:36865268-36865356	5.36467	0.50367	FALSE	0.417506	FALSE	-0.151667	FALSE	-1.24562	FALSE	0.428809	FALSE	-2.45007	FALSE
chr1	36893852	36894031	chr1:36893852-36894031	6.17737	-0.0694512	FALSE	-0.0382506	FALSE	-0.0403104	FALSE	-1.02535	FALSE	-0.877121	FALSE	-1.19276	FALSE
chr1	36905323	36905335	chr1:36905323-36905335	2.55963	-3.48238	FALSE	0.150912	FALSE	-1.65185	FALSE	0.21413	FALSE	-0.100308	FALSE	-0.999223	FALSE
chr1	36917466	36917644	chr1:36917466-36917644	30.1832	-0.168281	FALSE	-0.549246	FALSE	-0.746203	FALSE	-0.432811	FALSE	0.425567	FALSE	-0.133835	FALSE
chr1	36920341	36920865	chr1:36920341-36920865	44.2597	0.133575	FALSE	-0.27098	FALSE	-0.592097	FALSE	0.578132	FALSE	-0.232053	FALSE	-0.138012	FALSE
chr1	36926462	36926507	chr1:36926462-36926507	4.5568	-2.5059	FALSE	-0.0291549	FALSE	-2.0453	FALSE	1.48363	FALSE	1.32238	FALSE	0.230943	FALSE
chr1	36926887	36927041	chr1:36926887-36927041	3.76997	0.767003	FALSE	0.628227	FALSE	1.87245	FALSE	0.298059	FALSE	0.544334	FALSE	-0.552816	FALSE
chr1	36936550	36936843	chr1:36936550-36936843	21.4871	-0.904336	FALSE	-0.275493	FALSE	0.397179	FALSE	1.06547	Up	0.57118	FALSE	0.504876	FALSE
chr1	36939589	36940054	chr1:36939589-36940054	11.5817	0.051051	FALSE	0.512991	FALSE	0.0486319	FALSE	-0.362688	FALSE	-0.135541	FALSE	1.14459	FALSE
chr1	36943771	36944005	chr1:36943771-36944005	9.21215	-0.00412131	FALSE	-0.144451	FALSE	-0.197435	FALSE	-2.00771	Down	0.216824	FALSE	-2.49089	Down
chr1	36965888	36965938	chr1:36965888-36965938	3.8207	1.90005	FALSE	-0.165861	FALSE	-0.690707	FALSE	0.43111	FALSE	-0.139304	FALSE	0.943879	FALSE
chr1	36971307	36971412	chr1:36971307-36971412	4.61239	-0.00409091	FALSE	-0.557717	FALSE	-0.0357408	FALSE	-0.398695	FALSE	0.244121	FALSE	0.267684	FALSE
chr1	36978890	36979055	chr1:36978890-36979055	18.0886	-0.0888244	FALSE	-1.34059	FALSE	-0.142742	FALSE	0.828472	FALSE	0.281203	FALSE	1.02214	FALSE
chr1	36979308	36979348	chr1:36979308-36979348	7.05201	0.446709	FALSE	-1.20989	FALSE	1.06733	FALSE	0.729109	FALSE	-0.258704	FALSE	0.840845	FALSE
chr1	36982672	36982934	chr1:36982672-36982934	16.0671	-0.634061	FALSE	-2.08548	Down	-3.58152	Down	-3.69298	Down	-1.80028	Down	-3.16552	Down
chr1	36983773	36984120	chr1:36983773-36984120	33.5261	-0.404739	FALSE	-0.272638	FALSE	-0.78978	FALSE	-1.11966	Down	0.34127	FALSE	-0.82165	FALSE
chr1	36985941	36986174	chr1:36985941-36986174	20.8517	-0.162921	FALSE	-2.0888	FALSE	-4.83095	Down	-4.29736	Down	-3.60074	Down	-3.82138	Down
chr1	36994391	36994584	chr1:36994391-36994584	8.66555	-0.923948	FALSE	0.354401	FALSE	-2.72157	Down	-1.99702	Down	-0.00240357	FALSE	-1.60197	Down
chr1	37001720	37001892	chr1:37001720-37001892	9.13207	0.417036	FALSE	-0.0103475	FALSE	-0.799133	FALSE	-0.917584	FALSE	-1.17773	FALSE	-1.42981	Down
chr1	37011223	37011381	chr1:37011223-37011381	8.77003	0.481162	FALSE	-0.129554	FALSE	-0.580058	FALSE	-0.406812	FALSE	-2.35062	Down	-1.47546	FALSE
chr1	37013450	37013531	chr1:37013450-37013531	11.6496	-0.668166	FALSE	-0.0727474	FALSE	-0.852158	FALSE	-0.643579	FALSE	-1.12398	FALSE	-1.52311	FALSE
chr1	37013764	37013858	chr1:37013764-37013858	14.9061	-0.489029	FALSE	-0.13593	FALSE	-0.62928	FALSE	-0.355034	FALSE	-0.972502	FALSE	-1.06633	FALSE
chr1	37014452	37014473	chr1:37014452-37014473	4.65707	1.49484	FALSE	-0.637432	FALSE	-1.19831e-05	FALSE	0.117957	FALSE	0.0770298	FALSE	-0.773261	FALSE
chr1	37029240	37029395	chr1:37029240-37029395	6.42371	-0.6258	FALSE	-1.73265	FALSE	-1.44783	FALSE	-1.17181	FALSE	-1.12656	FALSE	-0.736718	FALSE
chr1	37030784	37030879	chr1:37030784-37030879	8.56211	0.0230953	FALSE	-0.517594	FALSE	-0.0347162	FALSE	0.326043	FALSE	-0.914485	FALSE	-0.122257	FALSE
chr1	37031450	37031550	chr1:37031450-37031550	7.30865	-0.873116	FALSE	-1.06206	FALSE	-0.827785	FALSE	-0.998784	FALSE	-0.191779	FALSE	-1.52239	FALSE
chr1	37033043	37033089	chr1:37033043-37033089	5.76479	-1.28466	FALSE	-0.334328	FALSE	-0.932889	FALSE	-0.835051	FALSE	0.340211	FALSE	-1.45472	FALSE
chr1	37042944	37042985	chr1:37042944-37042985	5.51975	0.466012	FALSE	0.284923	FALSE	0.311254	FALSE	0.173263	FALSE	0.3516	FALSE	-0.757122	FALSE
chr1	37043226	37043494	chr1:37043226-37043494	7.85629	0.639226	FALSE	-0.183994	FALSE	-0.360034	FALSE	-0.485806	FALSE	-0.340823	FALSE	-0.369766	FALSE
chr1	37046644	37046778	chr1:37046644-37046778	19.175	0.836543	FALSE	-0.474808	FALSE	-0.712023	FALSE	0.0478712	FALSE	-1.32683	FALSE	-0.464772	FALSE
chr1	37049117	37049453	chr1:37049117-37049453	9.0152	0.332607	FALSE	0.0286012	FALSE	-1.07623	FALSE	-0.341908	FALSE	-0.671435	FALSE	0.0534724	FALSE
chr1	37056932	37057046	chr1:37056932-37057046	5.15045	2.54221	FALSE	0.715033	FALSE	-0.15488	FALSE	0.821559	FALSE	-0.499738	FALSE	0.181696	FALSE
chr1	37064039	37064142	chr1:37064039-37064142	1.94701	-2.2629	FALSE	-0.73741	FALSE	-2.93509	FALSE	-0.173504	FALSE	0.477678	FALSE	1.01842	FALSE
chr1	37075644	37075697	chr1:37075644-37075697	3.06027	-1.99687	FALSE	-0.926358	FALSE	0.129877	FALSE	-3.08315	FALSE	-0.974131	FALSE	-0.602605	FALSE
chr1	37075902	37075976	chr1:37075902-37075976	8.89113	-0.273038	FALSE	0.607304	FALSE	-0.384205	FALSE	-0.330963	FALSE	-0.647579	FALSE	0.268877	FALSE
chr1	37080563	37080686	chr1:37080563-37080686	9.66934	0.968994	FALSE	-0.212687	FALSE	0.983519	FALSE	-0.526211	FALSE	-0.569053	FALSE	-0.342567	FALSE
chr1	37085329	37085404	chr1:37085329-37085404	4.69912	-1.50552	FALSE	0.43849	FALSE	-0.950721	FALSE	-4.22028	Down	0.550051	FALSE	-1.78505	Down
chr1	37100499	37100635	chr1:37100499-37100635	5.92249	0.0391506	FALSE	-1.38548	FALSE	-3.94003	Down	-4.10597	Down	-1.17006	FALSE	-1.19389	FALSE
chr1	37108514	37108748	chr1:37108514-37108748	4.48049	-1.12229	FALSE	-2.34165	FALSE	-0.756086	FALSE	0.00170141	FALSE	-0.454048	FALSE	-0.610794	FALSE
chr1	37117408	37117457	chr1:37117408-37117457	5.42468	-0.276347	FALSE	0.326915	FALSE	-1.23688	FALSE	0.325259	FALSE	-0.493723	FALSE	-0.44081	FALSE
chr1	37130139	37130290	chr1:37130139-37130290	23.2176	-0.073132	FALSE	-0.620255	FALSE	-1.1827	Down	-2.13071	Down	-1.01635	FALSE	-1.08662	Down
chr1	37178118	37178295	chr1:37178118-37178295	6.85995	0.172561	FALSE	-0.803824	FALSE	-0.591064	FALSE	0.553448	FALSE	-0.259998	FALSE	-1.13881	FALSE
chr1	37206798	37207007	chr1:37206798-37207007	7.84319	-1.01591	FALSE	0.58774	FALSE	0.330233	FALSE	0.403899	FALSE	-0.0548738	FALSE	-0.849837	FALSE
chr1	37212533	37212701	chr1:37212533-37212701	10.9299	-1.43022	FALSE	-0.492427	FALSE	-4.10426	Down	-3.42928	Down	-1.794	Down	-2.61183	Down
chr1	37214327	37214415	chr1:37214327-37214415	10.4414	-1.7483	FALSE	-0.815772	FALSE	-0.485354	FALSE	-0.964977	FALSE	-0.538177	FALSE	-1.04027	FALSE
chr1	37216584	37216626	chr1:37216584-37216626	2.86143	-0.0674654	FALSE	0.244404	FALSE	0.956174	FALSE	-0.452077	FALSE	0.263188	FALSE	-0.869753	FALSE
chr1	37226022	37226169	chr1:37226022-37226169	2.35342	-2.42951	FALSE	-0.566523	FALSE	-0.61104	FALSE	1.58615	FALSE	-0.452749	FALSE	0.804949	FALSE
chr1	37231463	37231637	chr1:37231463-37231637	8.6585	0.721724	FALSE	-0.65974	FALSE	-0.70182	FALSE	-0.209233	FALSE	-0.819904	FALSE	-0.882664	FALSE
chr1	37232195	37232226	chr1:37232195-37232226	4.67879	-3.19754	FALSE	-0.890799	FALSE	-0.551171	FALSE	-1.24542	FALSE	-0.672942	FALSE	0.0128056	FALSE
chr1	37246574	37246709	chr1:37246574-37246709	15.529	0.508118	FALSE	-0.0596278	FALSE	0.413892	FALSE	0.653473	FALSE	-0.254473	FALSE	-0.693976	FALSE
chr1	37262074	37262215	chr1:37262074-37262215	3.99585	0.0771861	FALSE	-0.588283	FALSE	-0.642654	FALSE	-0.329244	FALSE	0.207567	FALSE	-1.95393	FALSE
chr1	37273659	37273785	chr1:37273659-37273785	7.02536	-0.175904	FALSE	0.845196	FALSE	-1.42493	FALSE	-2.66632	Down	0.17174	FALSE	-2.48837	Down
chr1	37274828	37274884	chr1:37274828-37274884	4.24831	0.897654	FALSE	0.262796	FALSE	-0.678892	FALSE	0.771276	FALSE	0.735274	FALSE	-0.672347	FALSE
chr1	37284248	37284309	chr1:37284248-37284309	2.55925	0.617412	FALSE	-1.67048	FALSE	-2.42346	FALSE	-0.165235	FALSE	2.33585	FALSE	-0.550721	FALSE
chr1	37285633	37285786	chr1:37285633-37285786	3.3877	-0.34751	FALSE	0.411101	FALSE	-0.013148	FALSE	-0.980128	FALSE	0.224407	FALSE	-1.30826	FALSE
chr1	37289300	37289329	chr1:37289300-37289329	1.72545	-0.0578491	FALSE	-0.419457	FALSE	1.5121	FALSE	1.35979	FALSE	-2.53212	FALSE	0.343373	FALSE
chr1	37299619	37300328	chr1:37299619-37300328	9.80995	-0.205543	FALSE	0.146509	FALSE	0.690658	FALSE	0.0306367	FALSE	-0.121871	FALSE	-0.296313	FALSE
chr1	37314399	37314523	chr1:37314399-37314523	4.93404	-1.33673	FALSE	0.499808	FALSE	0.107147	FALSE	1.46922	FALSE	-0.658128	FALSE	0.335598	FALSE
chr1	37314778	37314909	chr1:37314778-37314909	2.83791	-1.06654	FALSE	-0.110434	FALSE	0.25513	FALSE	0.65914	FALSE	-1.28448	FALSE	0.376209	FALSE
chr1	37315203	37315263	chr1:37315203-37315263	3.12662	0	FALSE	-0.0356432	FALSE	-0.333633	FALSE	1.00133	FALSE	-1.27061	FALSE	1.65703	FALSE
chr1	37318535	37318578	chr1:37318535-37318578	3.2072	2.55725	FALSE	1.37287	FALSE	-1.27049	FALSE	2.13859	FALSE	-0.48189	FALSE	-0.396378	FALSE
chr1	37324749	37324902	chr1:37324749-37324902	4.36639	-0.0488158	FALSE	-0.396437	FALSE	-0.434691	FALSE	0.984889	FALSE	-0.137563	FALSE	-1.11531	FALSE
chr1	37331835	37331887	chr1:37331835-37331887	2.36185	0.644152	FALSE	1.28245	FALSE	1.08615	FALSE	3.3046	FALSE	1.61935	FALSE	-1.16876	FALSE
chr1	37340676	37340752	chr1:37340676-37340752	2.67428	-0.0506349	FALSE	1.81682	FALSE	2.41819	FALSE	-0.41245	FALSE	-0.878551	FALSE	-1.06615	FALSE
chr1	37341262	37341344	chr1:37341262-37341344	1.71492	-1.10619	FALSE	-2.28965	FALSE	1.4172	FALSE	-0.018368	FALSE	2.11227	FALSE	2.27152	FALSE
chr1	37401876	37401955	chr1:37401876-37401955	5.524	0.496001	FALSE	-0.167486	FALSE	0.795121	FALSE	0.273471	FALSE	0.330793	FALSE	-0.297502	FALSE
chr1	37409786	37409868	chr1:37409786-37409868	16.1824	0.9577	FALSE	0.0487693	FALSE	0.280253	FALSE	0.963632	FALSE	0.1266	FALSE	-0.891095	FALSE
chr1	37412791	37412897	chr1:37412791-37412897	7.05195	-0.180755	FALSE	0.272375	FALSE	-1.21467	FALSE	0.873375	FALSE	-1.5055	FALSE	-0.0114426	FALSE
chr1	37414948	37415058	chr1:37414948-37415058	5.3435	-0.967027	FALSE	-1.37875	FALSE	1.25216	FALSE	1.30305	FALSE	0.115688	FALSE	2.12935	FALSE
chr1	37419543	37419552	chr1:37419543-37419552	4.45193	0.20883	FALSE	0.359904	FALSE	2.08356	FALSE	-0.0746667	FALSE	0.52008	FALSE	-1.4406	FALSE
chr1	37420019	37420032	chr1:37420019-37420032	3.31464	0.242511	FALSE	-0.0734107	FALSE	-0.74033	FALSE	1.78973	FALSE	-3.75476	FALSE	0.383451	FALSE
chr1	37423997	37424340	chr1:37423997-37424340	5.30353	0.430405	FALSE	-1.36714	FALSE	0.456531	FALSE	2.64099	FALSE	-1.29891	FALSE	1.95901	FALSE
chr1	37429798	37430205	chr1:37429798-37430205	19.8048	0.666215	FALSE	0.0485863	FALSE	0.00918044	FALSE	-0.632112	FALSE	0.185178	FALSE	0.0806151	FALSE
chr1	37457678	37457823	chr1:37457678-37457823	8.37494	-0.0349786	FALSE	-1.0232	FALSE	-0.336249	FALSE	0.235891	FALSE	-1.746	FALSE	0.394197	FALSE
chr1	37458520	37458542	chr1:37458520-37458542	3.97852	0.871218	FALSE	0.808296	FALSE	0.730189	FALSE	-0.0929876	FALSE	-0.182168	FALSE	-0.781321	FALSE
chr1	37466719	37466725	chr1:37466719-37466725	2.23407	-1.17	FALSE	0.921359	FALSE	-3.14451	FALSE	0.0635289	FALSE	-0.323871	FALSE	1.57489	FALSE
chr1	37471121	37471211	chr1:37471121-37471211	8.36675	-0.842766	FALSE	0.25766	FALSE	0.693672	FALSE	2.26058	Up	-0.0823435	FALSE	0.751812	FALSE
chr1	37476239	37476309	chr1:37476239-37476309	4.98139	-0.469339	FALSE	0.185525	FALSE	0.560735	FALSE	1.35645	FALSE	-0.502458	FALSE	-0.0385086	FALSE
chr1	37481596	37481633	chr1:37481596-37481633	6.25655	0.0981422	FALSE	-0.421626	FALSE	1.27571	FALSE	0.913705	FALSE	0.19909	FALSE	0.361145	FALSE
chr1	37493657	37493768	chr1:37493657-37493768	4.93875	0.705206	FALSE	0.401297	FALSE	1.2714	FALSE	-0.424527	FALSE	0.0140754	FALSE	-0.0242194	FALSE
chr1	37502737	37502750	chr1:37502737-37502750	2.34558	-0.331242	FALSE	0.250886	FALSE	2.82041	FALSE	0.130438	FALSE	0.358454	FALSE	-0.374816	FALSE
chr1	37506539	37506648	chr1:37506539-37506648	2.39703	-0.447443	FALSE	0.0107553	FALSE	2.29948	FALSE	-0.427238	FALSE	1.12829	FALSE	2.35024	FALSE
chr1	37518512	37518522	chr1:37518512-37518522	4.64127	0.338696	FALSE	-0.415984	FALSE	0.77418	FALSE	0.19239	FALSE	1.01856	FALSE	-0.198892	FALSE
chr1	37519666	37519700	chr1:37519666-37519700	3.67435	0.866007	FALSE	0.44969	FALSE	0.268323	FALSE	0.203803	FALSE	0.103383	FALSE	0.930673	FALSE
chr1	37522252	37522306	chr1:37522252-37522306	7.68514	-0.145299	FALSE	-0.48476	FALSE	0.429795	FALSE	0.345965	FALSE	0.188765	FALSE	0.699803	FALSE
chr1	37524187	37524346	chr1:37524187-37524346	7.09213	0.86514	FALSE	0.366501	FALSE	0.487153	FALSE	1.22862	FALSE	0.63606	FALSE	-0.209353	FALSE
chr1	37527221	37527457	chr1:37527221-37527457	4.88775	-1.12099	FALSE	-0.463512	FALSE	0.478283	FALSE	0.66171	FALSE	0.351941	FALSE	0.10563	FALSE
chr1	37540912	37541455	chr1:37540912-37541455	24.6032	0.313678	FALSE	-0.147119	FALSE	0.793169	FALSE	-0.297395	FALSE	0.291854	FALSE	0.113987	FALSE
chr1	37546220	37546317	chr1:37546220-37546317	2.74634	1.45673	FALSE	1.16502	FALSE	1.30765	FALSE	-0.180719	FALSE	-1.05698	FALSE	-1.60643	FALSE
chr1	37546546	37546622	chr1:37546546-37546622	5.71145	0.0228072	FALSE	-0.324402	FALSE	0.379235	FALSE	-0.671592	FALSE	-0.362867	FALSE	-0.188008	FALSE
chr1	37568599	37568611	chr1:37568599-37568611	2.62781	1.40761	FALSE	1.60022	FALSE	-0.451818	FALSE	0.887678	FALSE	0.609889	FALSE	-0.810584	FALSE
chr1	37568947	37569130	chr1:37568947-37569130	4.24559	-0.263225	FALSE	1.48629	FALSE	1.98756	FALSE	0.769668	FALSE	1.66068	FALSE	-2.18955	FALSE
chr1	37569351	37569463	chr1:37569351-37569463	9.84435	0.125191	FALSE	1.61593	FALSE	2.24064	FALSE	0.424089	FALSE	1.36815	FALSE	-2.10294	FALSE
chr1	37579514	37579903	chr1:37579514-37579903	2.14639	-1.80398	FALSE	-1.03707	FALSE	-0.34662	FALSE	0.581887	FALSE	2.59084	FALSE	0.17333	FALSE
chr1	37603311	37603446	chr1:37603311-37603446	14.1275	0.511426	FALSE	-0.4213	FALSE	0.972824	FALSE	1.31465	Up	1.05611	FALSE	1.2586	FALSE
chr1	37609726	37609818	chr1:37609726-37609818	8.1698	0.197152	FALSE	-0.136038	FALSE	2.41312	Up	4.28316	Up	0.347283	FALSE	-0.562231	FALSE
chr1	37615007	37615038	chr1:37615007-37615038	7.84033	-1.1007	FALSE	-0.615332	FALSE	1.65879	FALSE	2.53461	Up	0.0618612	FALSE	0.580022	FALSE
chr1	37615466	37615532	chr1:37615466-37615532	7.09634	-1.26185	FALSE	0.2278	FALSE	0.656676	FALSE	1.74443	Up	0.848689	FALSE	1.80514	FALSE
chr1	37616437	37616688	chr1:37616437-37616688	9.32855	-0.468683	FALSE	0.445285	FALSE	0.0702681	FALSE	2.4708	Up	0.446883	FALSE	0.716345	FALSE
chr1	37617013	37617186	chr1:37617013-37617186	13.6852	0.166117	FALSE	0.859261	FALSE	0.986677	FALSE	1.30488	Up	0.391499	FALSE	0.903752	FALSE
chr1	37621449	37621708	chr1:37621449-37621708	4.21377	-1.02401	FALSE	-0.714112	FALSE	2.42077	FALSE	-1.43654	FALSE	1.34935	FALSE	1.8805	FALSE
chr1	37624347	37624438	chr1:37624347-37624438	6.0189	-0.240283	FALSE	-0.581127	FALSE	1.45914	FALSE	2.11946	Up	-0.214072	FALSE	0.781962	FALSE
chr1	37628573	37628665	chr1:37628573-37628665	5.69916	-0.659362	FALSE	0.218574	FALSE	1.00628	FALSE	1.38937	FALSE	-0.652068	FALSE	-1.27776	FALSE
chr1	37630985	37631024	chr1:37630985-37631024	2.86901	-0.559894	FALSE	-0.522549	FALSE	-1.01035	FALSE	1.03428	FALSE	-0.0928678	FALSE	1.91392	FALSE
chr1	37635887	37635890	chr1:37635887-37635890	3.81733	0.371864	FALSE	-0.365664	FALSE	0.760526	FALSE	-0.0513401	FALSE	0.8698	FALSE	-1.19619	FALSE
chr1	37639271	37639441	chr1:37639271-37639441	11.4256	0.293285	FALSE	0.584963	FALSE	-0.155276	FALSE	-0.41545	FALSE	-0.205214	FALSE	-0.490648	FALSE
chr1	37640407	37640515	chr1:37640407-37640515	4.91082	0.327455	FALSE	0.778148	FALSE	0.033878	FALSE	-0.925412	FALSE	-0.608169	FALSE	1.61375	FALSE
chr1	37644214	37644249	chr1:37644214-37644249	4.42432	0.587518	FALSE	-0.431206	FALSE	-0.983025	FALSE	-1.66104	FALSE	-0.149299	FALSE	-1.44445	FALSE
chr1	37647025	37647225	chr1:37647025-37647225	2.46902	-1.33024	FALSE	-1.44545	FALSE	-0.0264869	FALSE	-0.64508	FALSE	-0.104955	FALSE	-0.694609	FALSE
chr1	37666676	37666815	chr1:37666676-37666815	15.5355	1.14021	FALSE	0.357245	FALSE	1.05114	FALSE	0.502357	FALSE	0.375735	FALSE	0.621966	FALSE
chr1	37671488	37671645	chr1:37671488-37671645	15.8743	-0.276543	FALSE	0.159101	FALSE	-1.24567	Down	-1.18682	Down	-1.70806	Down	-1.94944	Down
chr1	37678327	37678604	chr1:37678327-37678604	7.35794	-0.600384	FALSE	0.0781984	FALSE	0.0903628	FALSE	0.639544	FALSE	-0.240502	FALSE	0.79148	FALSE
chr1	37684821	37685064	chr1:37684821-37685064	19.7304	0.767798	FALSE	0.220772	FALSE	0.243369	FALSE	0.261265	FALSE	0.081765	FALSE	0.508941	FALSE
chr1	37688626	37688627	chr1:37688626-37688627	5.91548	-0.71069	FALSE	0.631556	FALSE	1.26463	FALSE	0.290005	FALSE	-0.628084	FALSE	-0.991491	FALSE
chr1	37691354	37691421	chr1:37691354-37691421	11.8169	0.315996	FALSE	-0.85324	FALSE	0.200591	FALSE	1.2574	FALSE	0.239665	FALSE	-0.378069	FALSE
chr1	37694661	37694814	chr1:37694661-37694814	16.8339	0.376447	FALSE	0.0850757	FALSE	0.308796	FALSE	1.78454	Up	0.43398	FALSE	0.389153	FALSE
chr1	37702449	37702494	chr1:37702449-37702494	4.54688	-0.672601	FALSE	0.0926058	FALSE	0.156508	FALSE	0.748011	FALSE	0.327376	FALSE	-1.06584	FALSE
chr1	37711747	37711894	chr1:37711747-37711894	17.0867	0.0696975	FALSE	0.0304192	FALSE	0.124561	FALSE	0.73191	FALSE	-0.119805	FALSE	-0.252608	FALSE
chr1	37712146	37712218	chr1:37712146-37712218	9.8606	0.0317927	FALSE	0.697939	FALSE	0.86732	FALSE	0.913857	FALSE	0.78188	FALSE	0.788035	FALSE
chr1	37712521	37713039	chr1:37712521-37713039	11.2138	-0.532984	FALSE	0.612752	FALSE	1.27312	FALSE	1.50961	Up	0.28149	FALSE	1.67092	Up
chr1	37722453	37722475	chr1:37722453-37722475	5.01427	1.33091	FALSE	-0.476838	FALSE	1.85862	FALSE	0.405339	FALSE	0.539353	FALSE	-0.00979026	FALSE
chr1	37737206	37737288	chr1:37737206-37737288	4.93381	0.474252	FALSE	0.317256	FALSE	-0.0352222	FALSE	1.28318	FALSE	1.10073	FALSE	-0.21205	FALSE
chr1	37805806	37805866	chr1:37805806-37805866	4.09795	-0.272831	FALSE	0.289955	FALSE	0.189933	FALSE	0.856061	FALSE	0.746114	FALSE	0.300345	FALSE
chr1	37836557	37836599	chr1:37836557-37836599	3.05327	0.0880048	FALSE	0.180278	FALSE	-0.534777	FALSE	2.10748	FALSE	-0.175192	FALSE	-2.53599	FALSE
chr1	37851950	37852227	chr1:37851950-37852227	11.5694	-0.154262	FALSE	1.12776	FALSE	0.935281	FALSE	0.75456	FALSE	-0.380703	FALSE	0.292865	FALSE
chr1	37852690	37852762	chr1:37852690-37852762	7.9325	0.679915	FALSE	-0.865488	FALSE	1.15475	FALSE	0.473107	FALSE	0.0141706	FALSE	-0.277758	FALSE
chr1	37858476	37858487	chr1:37858476-37858487	3.07635	-0.485378	FALSE	0.906239	FALSE	0.752573	FALSE	0.679103	FALSE	0.119118	FALSE	0.715603	FALSE
chr1	37864914	37865247	chr1:37864914-37865247	76.3008	0.161503	FALSE	0.148566	FALSE	0.0422212	FALSE	0.169282	FALSE	-0.0884471	FALSE	0.264069	FALSE
chr1	37870470	37870539	chr1:37870470-37870539	7.99486	1.12238	FALSE	0.30237	FALSE	1.09116	FALSE	0.121401	FALSE	0.893456	FALSE	-0.433514	FALSE
chr1	37872200	37872448	chr1:37872200-37872448	13.45	-0.279142	FALSE	0.789232	FALSE	5.99802e-05	FALSE	-0.0117073	FALSE	-0.0227672	FALSE	-0.0463878	FALSE
chr1	37873315	37873340	chr1:37873315-37873340	6.89058	1.79871	FALSE	0.651827	FALSE	1.35705	FALSE	0.943538	FALSE	0.326943	FALSE	0.738082	FALSE
chr1	37873547	37873579	chr1:37873547-37873579	3.99336	0.822755	FALSE	0.273025	FALSE	1.48052	FALSE	0.792697	FALSE	-2.1228	FALSE	0.290106	FALSE
chr1	37883590	37883610	chr1:37883590-37883610	4.67465	-0.0135356	FALSE	-1.12784	FALSE	0.570933	FALSE	-1.40818	FALSE	0.297861	FALSE	-0.451466	FALSE
chr1	37884663	37884713	chr1:37884663-37884713	2.67944	0.627854	FALSE	1.61106	FALSE	0.182349	FALSE	-0.296072	FALSE	1.85458	FALSE	0.0447344	FALSE
chr1	37890331	37890571	chr1:37890331-37890571	18.8689	-0.996092	FALSE	0.00501724	FALSE	1.00531	FALSE	0.363386	FALSE	0.433595	FALSE	0.64257	FALSE
chr1	37900038	37900084	chr1:37900038-37900084	4.73283	-1.31652	FALSE	0.668203	FALSE	2.11644	FALSE	1.64742	FALSE	-0.129733	FALSE	0.98946	FALSE
chr1	37900452	37900545	chr1:37900452-37900545	9.77998	0.997943	FALSE	0.313496	FALSE	1.70164	FALSE	0.474596	FALSE	0.927902	FALSE	-0.931773	FALSE
chr1	37903361	37903433	chr1:37903361-37903433	3.67746	2.1742	FALSE	-0.317202	FALSE	-0.558515	FALSE	-0.0372239	FALSE	-0.363958	FALSE	0.348977	FALSE
chr1	37917904	37917937	chr1:37917904-37917937	2.28781	-1.94763	FALSE	-2.54535	FALSE	-1.26687	FALSE	2.75017	Up	-0.815675	FALSE	-0.342636	FALSE
chr1	37918459	37918661	chr1:37918459-37918661	6.45798	0.0536705	FALSE	-0.710283	FALSE	0.843452	FALSE	1.78447	Up	0.590763	FALSE	3.34431	Up
chr1	37927578	37927762	chr1:37927578-37927762	15.055	0.446313	FALSE	0.470033	FALSE	1.72453	Up	1.77128	Up	0.45766	FALSE	2.28155	Up
chr1	37931919	37932033	chr1:37931919-37932033	20.0635	0.754821	FALSE	0.482335	FALSE	0.769437	FALSE	0.967575	FALSE	-0.460409	FALSE	0.0958112	FALSE
chr1	37934183	37934201	chr1:37934183-37934201	4.03456	1.21127	FALSE	0.0664127	FALSE	0.705908	FALSE	2.41885	FALSE	1.4282	FALSE	-1.18316	FALSE
chr1	37948971	37949224	chr1:37948971-37949224	14.9816	-0.134438	FALSE	-0.702336	FALSE	0.696005	FALSE	-0.206951	FALSE	-0.374904	FALSE	0.0994871	FALSE
chr1	37976685	37976772	chr1:37976685-37976772	3.84985	-0.566664	FALSE	0.177683	FALSE	0.0631594	FALSE	0.471182	FALSE	-0.412142	FALSE	-0.39573	FALSE
chr1	37985880	37985886	chr1:37985880-37985886	3.03452	1.79271	FALSE	0.717265	FALSE	0.902202	FALSE	0.0781377	FALSE	0.549494	FALSE	-1.83049	FALSE
chr1	37986173	37986220	chr1:37986173-37986220	3.90827	2.2326	FALSE	0.626479	FALSE	1.2517	FALSE	0.416242	FALSE	1.0334	FALSE	-0.0696591	FALSE
chr1	37996902	37996932	chr1:37996902-37996932	10.9025	0.492539	FALSE	-0.750649	FALSE	-0.820125	FALSE	-0.666279	FALSE	0.0423952	FALSE	0.469297	FALSE
chr1	37997215	37997385	chr1:37997215-37997385	69.5641	0.622597	FALSE	-0.0974166	FALSE	0.199953	FALSE	-0.00285535	FALSE	-0.0589252	FALSE	0.170757	FALSE
chr1	37997982	37998150	chr1:37997982-37998150	38.2769	0.17816	FALSE	0.250399	FALSE	-0.60884	FALSE	-0.936564	Down	-0.314169	FALSE	-0.131636	FALSE
chr1	38002089	38002265	chr1:38002089-38002265	10.3318	1.40242	FALSE	0.545664	FALSE	-0.376041	FALSE	1.37729	FALSE	0.886978	FALSE	1.26781	FALSE
chr1	38003283	38003292	chr1:38003283-38003292	3.77741	-1.35374	FALSE	-1.54286	FALSE	-1.54621	FALSE	1.42526	FALSE	0.438008	FALSE	0.626914	FALSE
chr1	38006859	38007099	chr1:38006859-38007099	9.95159	-0.519663	FALSE	0.176498	FALSE	0.893866	FALSE	0.643599	FALSE	0.901088	FALSE	1.56099	Up
chr1	38014677	38014805	chr1:38014677-38014805	7.23108	0.516118	FALSE	0.963203	FALSE	-0.496086	FALSE	-0.196713	FALSE	0.990752	FALSE	-0.100638	FALSE
chr1	38050346	38050372	chr1:38050346-38050372	4.00214	1.02991	FALSE	0.278805	FALSE	1.04856	FALSE	1.99365	Up	0.252069	FALSE	1.13157	FALSE
chr1	38058623	38058635	chr1:38058623-38058635	4.84374	-0.177815	FALSE	-1.64949	FALSE	-3.63137	Down	-2.20186	FALSE	-0.0843956	FALSE	-2.74643	Down
chr1	38062451	38062620	chr1:38062451-38062620	5.0067	0.26203	FALSE	1.46869	FALSE	-0.992958	FALSE	0.532024	FALSE	1.42397	FALSE	0.808619	FALSE
chr1	38071489	38071565	chr1:38071489-38071565	6.45059	0.818893	FALSE	1.41765	FALSE	0.723667	FALSE	0.877106	FALSE	2.24572	FALSE	-0.256491	FALSE
chr1	38071948	38072018	chr1:38071948-38072018	3.34462	3.28549	FALSE	1.42356	FALSE	0.00131413	FALSE	-2.38252	FALSE	0.874973	FALSE	0.995174	FALSE
chr1	38088366	38088468	chr1:38088366-38088468	7.37785	1.05716	FALSE	0.326498	FALSE	-0.105303	FALSE	0.573887	FALSE	1.25895	FALSE	-1.39542	FALSE
chr1	38093269	38093369	chr1:38093269-38093369	4.6437	0.167978	FALSE	0.24773	FALSE	1.227	FALSE	2.45121	FALSE	-0.0276914	FALSE	-0.0700175	FALSE
chr1	38095331	38095424	chr1:38095331-38095424	3.63631	0.190027	FALSE	0.469863	FALSE	-0.786664	FALSE	-0.71447	FALSE	0.738126	FALSE	-1.02061	FALSE
chr1	38117069	38117074	chr1:38117069-38117074	2.94108	0.814088	FALSE	1.13069	FALSE	1.54495	FALSE	1.78293	FALSE	-0.0947067	FALSE	1.13833	FALSE
chr1	38118367	38118454	chr1:38118367-38118454	5.85237	0.271056	FALSE	-0.352801	FALSE	1.0894	FALSE	0.903861	FALSE	-0.365003	FALSE	0.248045	FALSE
chr1	38129717	38130207	chr1:38129717-38130207	22.5598	-0.314565	FALSE	0.152076	FALSE	0.537016	FALSE	0.152912	FALSE	0.41576	FALSE	0.547727	FALSE
chr1	38131353	38131366	chr1:38131353-38131366	7.48083	3.44953	FALSE	-0.898214	FALSE	-0.231104	FALSE	0.413551	FALSE	0.482325	FALSE	-0.297866	FALSE
chr1	38133015	38133138	chr1:38133015-38133138	18.0174	-0.134322	FALSE	0.391568	FALSE	-0.0562026	FALSE	-0.260602	FALSE	0.0888299	FALSE	0.273074	FALSE
chr1	38137179	38137402	chr1:38137179-38137402	8.10587	0.498797	FALSE	0.60319	FALSE	0.807459	FALSE	0.748327	FALSE	0.203992	FALSE	0.686138	FALSE
chr1	38159644	38159663	chr1:38159644-38159663	4.42027	-0.229417	FALSE	1.12965	FALSE	0.313902	FALSE	-0.668525	FALSE	0.227872	FALSE	1.09869	FALSE
chr1	38315399	38315630	chr1:38315399-38315630	4.51909	-0.354312	FALSE	0.874703	FALSE	2.1186	FALSE	0.799715	FALSE	-0.274102	FALSE	-0.0378009	FALSE
chr1	38326936	38327215	chr1:38326936-38327215	12.8656	-0.441084	FALSE	-0.531765	FALSE	0.550982	FALSE	1.20217	Up	0.272154	FALSE	2.08821	Up
chr1	38330622	38330846	chr1:38330622-38330846	22.5559	0.30282	FALSE	0.00841127	FALSE	1.49526	Up	1.48016	Up	-0.0455407	FALSE	0.760689	FALSE
chr1	38354787	38354884	chr1:38354787-38354884	2.32913	0	FALSE	-0.858417	FALSE	0.0143679	FALSE	0.900665	FALSE	-0.205283	FALSE	0.080533	FALSE
chr1	38355744	38355789	chr1:38355744-38355789	2.70193	0.664616	FALSE	-0.446009	FALSE	-0.284429	FALSE	0.313224	FALSE	0.086806	FALSE	0.465182	FALSE
chr1	38356519	38356582	chr1:38356519-38356582	3.19476	0.772514	FALSE	0.616569	FALSE	-0.15793	FALSE	-1.07896	FALSE	1.58277	FALSE	-2.87226	FALSE
chr1	38356821	38356845	chr1:38356821-38356845	4.08579	0.773402	FALSE	0.438631	FALSE	-0.203225	FALSE	-1.18602	FALSE	1.48415	FALSE	-2.14793	FALSE
chr1	38362426	38362541	chr1:38362426-38362541	5.13719	0.101051	FALSE	0.517378	FALSE	0.644571	FALSE	0.457074	FALSE	1.41542	FALSE	1.37038	FALSE
chr1	38363693	38363698	chr1:38363693-38363698	3.72058	-1.2326	FALSE	1.60159	FALSE	0.856145	FALSE	1.1408	FALSE	-0.250731	FALSE	1.03287	FALSE
chr1	38369024	38369109	chr1:38369024-38369109	2.07932	0.197131	FALSE	-1.18868	FALSE	0.10082	FALSE	1.08714	FALSE	-0.479243	FALSE	0.385806	FALSE
chr1	38384563	38384608	chr1:38384563-38384608	4.82947	-0.596896	FALSE	0.485291	FALSE	1.67211	FALSE	0.63065	FALSE	-1.21741	FALSE	-0.887948	FALSE
chr1	38407118	38407163	chr1:38407118-38407163	3.32981	0.566593	FALSE	0.260982	FALSE	1.57527	FALSE	-0.312425	FALSE	0.390145	FALSE	1.07024	FALSE
chr1	38430486	38430587	chr1:38430486-38430587	9.26088	-0.39365	FALSE	0.042095	FALSE	1.64338	FALSE	-0.354406	FALSE	0.619959	FALSE	0.358258	FALSE
chr1	38456331	38456551	chr1:38456331-38456551	3.33397	0.39214	FALSE	-0.296947	FALSE	0.547035	FALSE	3.61854	Up	0.173427	FALSE	1.58914	FALSE
chr1	38503648	38503927	chr1:38503648-38503927	10.9033	-0.13341	FALSE	0.82594	FALSE	1.69169	Up	0.836699	FALSE	1.25247	FALSE	0.766193	FALSE
chr1	38547751	38547936	chr1:38547751-38547936	8.69602	1.47982	FALSE	0.599781	FALSE	0.445918	FALSE	2.28653	Up	0.937609	FALSE	0.96459	FALSE
chr1	38590603	38590672	chr1:38590603-38590672	5.85189	0.67242	FALSE	0.508305	FALSE	0.910662	FALSE	3.21868	Up	0.141138	FALSE	0.0533125	FALSE
chr1	38592567	38592724	chr1:38592567-38592724	9.34991	0.473388	FALSE	-0.151237	FALSE	2.64117	Up	3.84013	Up	1.16324	FALSE	1.71708	FALSE
chr1	38627405	38627544	chr1:38627405-38627544	4.54128	0.217273	FALSE	0.273099	FALSE	-0.449234	FALSE	0.0190878	FALSE	1.10153	FALSE	0.899248	FALSE
chr1	38669709	38669713	chr1:38669709-38669713	1.55584	4.30784	FALSE	2.05694	FALSE	1.02751	FALSE	0.301857	FALSE	-1.83507	FALSE	-0.0912875	FALSE
chr1	38674258	38674266	chr1:38674258-38674266	2.26918	1.18961	FALSE	1.17921	FALSE	1.1164	FALSE	-2.11047	FALSE	-1.95177	FALSE	-0.234808	FALSE
chr1	38674681	38674719	chr1:38674681-38674719	1.61934	0.899631	FALSE	0.94493	FALSE	1.00114	FALSE	0.943349	FALSE	2.09588	FALSE	-0.892729	FALSE
chr1	38683726	38683827	chr1:38683726-38683827	4.87699	0.0983637	FALSE	0.439592	FALSE	1.57362	FALSE	1.13889	FALSE	1.08529	FALSE	-0.467249	FALSE
chr1	38749711	38749932	chr1:38749711-38749932	2.38023	0	FALSE	2.28736	FALSE	2.9159	Up	3.26877	Up	-0.766853	FALSE	1.20457	FALSE
chr1	38824057	38824210	chr1:38824057-38824210	3.1381	-2.43621	FALSE	-0.757573	FALSE	-2.24425	FALSE	-4.66168	Down	-1.15548	FALSE	-4.34319	Down
chr1	38833118	38833251	chr1:38833118-38833251	2.34533	0.493807	FALSE	0.974588	FALSE	0.957977	FALSE	1.68679	FALSE	-1.73117	FALSE	-2.51773	FALSE
chr1	38874018	38874214	chr1:38874018-38874214	7.27947	-1.01472	FALSE	-0.166163	FALSE	2.21766	Up	0.822418	FALSE	1.45933	FALSE	-0.0532707	FALSE
chr1	38875587	38875623	chr1:38875587-38875623	2.55853	-0.433786	FALSE	-0.505446	FALSE	-1.30276	FALSE	3.80928	Up	-0.150538	FALSE	-0.772414	FALSE
chr1	38887704	38887735	chr1:38887704-38887735	2.97191	-0.521686	FALSE	1.59368	FALSE	0.783187	FALSE	1.31028	FALSE	0.537421	FALSE	0.536891	FALSE
chr1	38901646	38901716	chr1:38901646-38901716	3.86659	0.655111	FALSE	1.35384	FALSE	0.628206	FALSE	1.98937	FALSE	0.14644	FALSE	-0.62912	FALSE
chr1	38930980	38931085	chr1:38930980-38931085	5.42342	0.293441	FALSE	-0.111835	FALSE	-1.86449	FALSE	0.993348	FALSE	-0.0163303	FALSE	0.437202	FALSE
chr1	38969642	38969825	chr1:38969642-38969825	1.32925	-1.10247	FALSE	-0.898563	FALSE	0.831987	FALSE	-2.87493	FALSE	-0.158122	FALSE	-4.21477	FALSE
chr1	38985956	38986084	chr1:38985956-38986084	9.75989	-1.96284	FALSE	0.0363305	FALSE	1.34935	FALSE	1.2465	FALSE	0.453838	FALSE	2.07774	Up
chr1	38987541	38987707	chr1:38987541-38987707	60.1575	0.0959255	FALSE	-0.187091	FALSE	0.362644	FALSE	0.35739	FALSE	0.371703	FALSE	0.350822	FALSE
chr1	39007011	39007043	chr1:39007011-39007043	5.49231	-0.523712	FALSE	-0.807975	FALSE	-0.551464	FALSE	-0.767385	FALSE	-0.880294	FALSE	-1.89617	FALSE
chr1	39017581	39017674	chr1:39017581-39017674	4.45975	-1.32916	FALSE	-0.576757	FALSE	-1.92648	FALSE	1.55043	FALSE	-0.324008	FALSE	-0.661248	FALSE
chr1	39072821	39073319	chr1:39072821-39073319	4.34391	0.443448	FALSE	1.66152	FALSE	1.79152	FALSE	-0.578445	FALSE	2.50429	FALSE	-0.94455	FALSE
chr1	39100651	39100875	chr1:39100651-39100875	10.9497	0.531182	FALSE	0.342808	FALSE	0.932144	FALSE	0.549896	FALSE	1.24877	FALSE	-0.562524	FALSE
chr1	39105661	39105681	chr1:39105661-39105681	4.45556	0.642355	FALSE	-0.00680733	FALSE	0.817609	FALSE	-0.162524	FALSE	-0.693496	FALSE	1.05892	FALSE
chr1	39122728	39123745	chr1:39122728-39123745	26.6865	-0.218552	FALSE	-0.142649	FALSE	-0.171607	FALSE	0.183911	FALSE	-0.657334	FALSE	-0.486507	FALSE
chr1	39128884	39128909	chr1:39128884-39128909	4.09024	-0.145836	FALSE	-0.810707	FALSE	0.87329	FALSE	-2.44249	FALSE	-0.785745	FALSE	-0.395195	FALSE
chr1	39130775	39130893	chr1:39130775-39130893	14.5954	0.516765	FALSE	0.235078	FALSE	-0.644884	FALSE	-1.37624	FALSE	-2.27885	FALSE	-3.25373	Down
chr1	39133720	39133723	chr1:39133720-39133723	4.75681	1.69385	FALSE	0.573943	FALSE	0.68687	FALSE	0.300228	FALSE	-0.767478	FALSE	-0.39767	FALSE
chr1	39135277	39135435	chr1:39135277-39135435	7.33183	0.779809	FALSE	0.718631	FALSE	1.12052	FALSE	-0.0309698	FALSE	-2.17254	FALSE	-0.585231	FALSE
chr1	39138508	39138602	chr1:39138508-39138602	4.75902	0.543147	FALSE	0.624474	FALSE	0.433415	FALSE	0.209733	FALSE	-1.01505	FALSE	-0.787783	FALSE
chr1	39150395	39150403	chr1:39150395-39150403	2.17798	0.739711	FALSE	-1.20909	FALSE	2.73864	FALSE	-3.17264	FALSE	-0.509259	FALSE	0.929154	FALSE
chr1	39162326	39162474	chr1:39162326-39162474	5.42878	0.227674	FALSE	0.219219	FALSE	0.63291	FALSE	2.12946	Up	-0.886736	FALSE	1.61348	FALSE
chr1	39179095	39179131	chr1:39179095-39179131	5.12351	-0.698275	FALSE	-1.88913	FALSE	1.0181	FALSE	-0.535984	FALSE	-0.196004	FALSE	0.100441	FALSE
chr1	39186818	39187000	chr1:39186818-39187000	18.829	0.00949767	FALSE	-0.180544	FALSE	0.834946	FALSE	1.33128	Up	-0.175356	FALSE	0.0915307	FALSE
chr1	39196898	39197239	chr1:39196898-39197239	8.8603	0.697193	FALSE	0.334005	FALSE	-0.279846	FALSE	0.0864524	FALSE	0.0760396	FALSE	0.183297	FALSE
chr1	39198144	39198377	chr1:39198144-39198377	5.97705	-0.741135	FALSE	-0.831168	FALSE	-0.715735	FALSE	-1.07008	FALSE	1.02271	FALSE	0.174411	FALSE
chr1	39205766	39205958	chr1:39205766-39205958	10.4508	0.348565	FALSE	0.648081	FALSE	0.328644	FALSE	2.01581	Up	0.604784	FALSE	0.601885	FALSE
chr1	39207062	39207155	chr1:39207062-39207155	11.4779	1.19853	FALSE	1.02899	FALSE	1.00481	FALSE	0.480445	FALSE	0.482225	FALSE	0.396226	FALSE
chr1	39223917	39223943	chr1:39223917-39223943	1.86651	1.1371	FALSE	0.617009	FALSE	0.490422	FALSE	-1.77531	FALSE	-1.29734	FALSE	-1.85756	FALSE
chr1	39229521	39229764	chr1:39229521-39229764	3.38812	-0.172461	FALSE	2.69084	FALSE	0.997958	FALSE	1.1995	FALSE	-0.111898	FALSE	-1.49012	FALSE
chr1	39235248	39235322	chr1:39235248-39235322	4.06538	0.636856	FALSE	0.559452	FALSE	-0.0858503	FALSE	4.06922	Up	0.920618	FALSE	0.264263	FALSE
chr1	39241105	39241192	chr1:39241105-39241192	1.94053	2.16803	FALSE	-1.11029	FALSE	-0.36407	FALSE	1.58374	FALSE	-0.194992	FALSE	2.04918	FALSE
chr1	39252192	39252314	chr1:39252192-39252314	3.97466	-0.815257	FALSE	0.854921	FALSE	0.840074	FALSE	0.536402	FALSE	-1.3201	FALSE	-0.584575	FALSE
chr1	39252878	39252922	chr1:39252878-39252922	5.38286	0.350524	FALSE	-0.898103	FALSE	-0.634016	FALSE	1.26689	FALSE	1.45787	FALSE	0.0824193	FALSE
chr1	39284822	39284856	chr1:39284822-39284856	2.63161	-0.456843	FALSE	-1.32771	FALSE	0.633845	FALSE	1.54095	FALSE	1.84805	FALSE	0.128616	FALSE
chr1	39292081	39292250	chr1:39292081-39292250	46.9777	0.494953	FALSE	0.427205	FALSE	1.16437	Up	0.680364	FALSE	-0.204049	FALSE	0.797936	FALSE
chr1	39293939	39293947	chr1:39293939-39293947	7.01258	1.20016	FALSE	-0.342111	FALSE	1.20123	FALSE	0.263074	FALSE	2.15384	FALSE	-0.770944	FALSE
chr1	39294682	39294778	chr1:39294682-39294778	7.0033	0.920936	FALSE	-0.427913	FALSE	3.81075	Up	1.41297	FALSE	1.69284	FALSE	0.0232785	FALSE
chr1	39295262	39295293	chr1:39295262-39295293	7.9323	-0.0337332	FALSE	0.157238	FALSE	1.81511	FALSE	0.685123	FALSE	1.16445	FALSE	-0.720784	FALSE
chr1	39303681	39303828	chr1:39303681-39303828	5.31888	-0.579318	FALSE	-0.582395	FALSE	1.76189	FALSE	1.49778	FALSE	-1.19004	FALSE	-0.390379	FALSE
chr1	39305142	39305207	chr1:39305142-39305207	3.07737	-0.202564	FALSE	-3.31153	FALSE	1.34732	FALSE	2.06439	FALSE	0.719866	FALSE	-0.419879	FALSE
chr1	39324800	39324804	chr1:39324800-39324804	1.86916	-1.47432	FALSE	1.64235	FALSE	0.880436	FALSE	1.8101	FALSE	-1.8158	FALSE	1.76071	FALSE
chr1	39330960	39331098	chr1:39330960-39331098	3.11543	1.0533	FALSE	-0.183814	FALSE	0.0887729	FALSE	-1.27306	FALSE	0.242222	FALSE	2.54685	FALSE
chr1	39339314	39339360	chr1:39339314-39339360	3.30004	0.0251888	FALSE	0.00977665	FALSE	1.08735	FALSE	-0.927476	FALSE	1.30645	FALSE	-0.675874	FALSE
chr1	39340835	39340945	chr1:39340835-39340945	10.2048	0.845275	FALSE	0.252335	FALSE	0.521253	FALSE	0.309432	FALSE	0.0839689	FALSE	-0.17229	FALSE
chr1	39345106	39345126	chr1:39345106-39345126	7.86058	-0.516427	FALSE	1.187	FALSE	1.41093	FALSE	1.75636	Up	1.04653	FALSE	0.112798	FALSE
chr1	39346445	39346633	chr1:39346445-39346633	4.71227	-0.96652	FALSE	0.0565556	FALSE	-0.724028	FALSE	-0.472351	FALSE	1.62023	FALSE	2.18027	FALSE
chr1	39348127	39348269	chr1:39348127-39348269	14.4576	0.955028	FALSE	1.5821	FALSE	0.466542	FALSE	0.430848	FALSE	0.385676	FALSE	-0.349631	FALSE
chr1	39348928	39349340	chr1:39348928-39349340	13.0288	0.384045	FALSE	0.86696	FALSE	0.936568	FALSE	0.328379	FALSE	-0.339401	FALSE	0.522959	FALSE
chr1	39349579	39349664	chr1:39349579-39349664	28.3084	0.284013	FALSE	0.943397	FALSE	1.29212	Up	-0.0357073	FALSE	0.107012	FALSE	-0.0535998	FALSE
chr1	39362319	39362720	chr1:39362319-39362720	4.69636	0.957554	FALSE	-0.407451	FALSE	1.39672	FALSE	0.440212	FALSE	0.242963	FALSE	-0.315946	FALSE
chr1	39367754	39367900	chr1:39367754-39367900	41.2599	0.128247	FALSE	-0.0029301	FALSE	-0.332086	FALSE	0.0246352	FALSE	0.0933127	FALSE	0.338136	FALSE
chr1	39376437	39376745	chr1:39376437-39376745	9.7195	0.530035	FALSE	0.60536	FALSE	0.318057	FALSE	0.875363	FALSE	-0.759379	FALSE	1.24673	FALSE
chr1	39392298	39392387	chr1:39392298-39392387	5.8664	-0.348013	FALSE	0.169213	FALSE	1.07289	FALSE	-1.51276	FALSE	-0.354584	FALSE	-0.591291	FALSE
chr1	39397842	39397871	chr1:39397842-39397871	4.61925	-0.320012	FALSE	-0.103868	FALSE	-0.568308	FALSE	3.18091	Up	0.397595	FALSE	-0.622809	FALSE
chr1	39453774	39453813	chr1:39453774-39453813	5.72274	1.00381	FALSE	0.812419	FALSE	0.452781	FALSE	0.327422	FALSE	-0.390873	FALSE	-1.01504	FALSE
chr1	39456406	39456806	chr1:39456406-39456806	8.9799	0.439055	FALSE	0.0485879	FALSE	0.042347	FALSE	-0.431664	FALSE	0.0824762	FALSE	-0.733775	FALSE
chr1	39459331	39459373	chr1:39459331-39459373	6.93152	2.44281	FALSE	0.363015	FALSE	0.283912	FALSE	-0.0834027	FALSE	-1.3836	FALSE	-3.06866	Down
chr1	39463163	39463210	chr1:39463163-39463210	5.8136	-0.727503	FALSE	1.38983	FALSE	1.21832	FALSE	0.0541652	FALSE	-0.116212	FALSE	0.62361	FALSE
chr1	39465613	39466082	chr1:39465613-39466082	4.83534	-0.562088	FALSE	0.096532	FALSE	0.0665273	FALSE	0.927066	FALSE	0.722719	FALSE	-0.0382397	FALSE
chr1	39467392	39467407	chr1:39467392-39467407	4.30005	-1.53749	FALSE	-1.24338	FALSE	2.13006	Up	1.807	FALSE	0.411943	FALSE	-0.396149	FALSE
chr1	39476833	39476915	chr1:39476833-39476915	5.67842	-0.432439	FALSE	-0.21112	FALSE	1.00071	FALSE	0.605728	FALSE	-1.08919	FALSE	-0.212404	FALSE
chr1	39478681	39478886	chr1:39478681-39478886	14.161	-0.347092	FALSE	-0.308136	FALSE	0.78301	FALSE	0.158797	FALSE	0.289766	FALSE	0.0520357	FALSE
chr1	39508731	39508788	chr1:39508731-39508788	2.43674	2.3633	FALSE	0.775923	FALSE	-1.11765	FALSE	-1.86503	FALSE	1.45395	FALSE	-2.04198	FALSE
chr1	39520938	39521166	chr1:39520938-39521166	20.5857	-0.0661627	FALSE	0.0624008	FALSE	0.602515	FALSE	-0.280495	FALSE	0.304549	FALSE	0.456246	FALSE
chr1	39527385	39527647	chr1:39527385-39527647	6.57588	0.799575	FALSE	0.203828	FALSE	-1.49277	FALSE	0.144904	FALSE	0.107133	FALSE	-0.201992	FALSE
chr1	39535525	39535839	chr1:39535525-39535839	20.3259	-0.42359	FALSE	0.320025	FALSE	0.133761	FALSE	0.205405	FALSE	-0.524037	FALSE	0.381831	FALSE
chr1	39554250	39554352	chr1:39554250-39554352	9.8816	1.20238	FALSE	1.17426	FALSE	-0.151411	FALSE	0.26221	FALSE	0.819963	FALSE	0.798663	FALSE
chr1	39568846	39569003	chr1:39568846-39569003	11.6398	0.270072	FALSE	0.328093	FALSE	0.552364	FALSE	1.10466	FALSE	0.701671	FALSE	0.524727	FALSE
chr1	39571762	39571892	chr1:39571762-39571892	23.2882	-0.0269434	FALSE	0.421027	FALSE	0.469797	FALSE	0.829998	FALSE	-0.487747	FALSE	1.17197	Up
chr1	39574078	39574188	chr1:39574078-39574188	14.7505	-0.212663	FALSE	-0.281416	FALSE	0.228526	FALSE	1.83281	Up	0.428151	FALSE	1.07652	FALSE
chr1	39577323	39577553	chr1:39577323-39577553	13.1329	0.182474	FALSE	0.00677754	FALSE	-0.0869771	FALSE	0.364826	FALSE	-0.272062	FALSE	0.584025	FALSE
chr1	39591711	39591748	chr1:39591711-39591748	6.55523	0.155024	FALSE	0.317684	FALSE	-1.04651	FALSE	0.886674	FALSE	-0.967267	FALSE	0.518178	FALSE
chr1	39606886	39607034	chr1:39606886-39607034	9.84835	-0.845411	FALSE	-0.918504	FALSE	-1.20722	FALSE	0.255703	FALSE	0.316014	FALSE	1.47803	FALSE
chr1	39608547	39608623	chr1:39608547-39608623	5.38056	-0.0172838	FALSE	-1.73985	FALSE	-2.05258	FALSE	-0.46878	FALSE	0.318219	FALSE	0.721771	FALSE
chr1	39613118	39613167	chr1:39613118-39613167	8.28105	1.41898	FALSE	-0.285508	FALSE	-0.599087	FALSE	-0.672704	FALSE	-0.722235	FALSE	-0.458965	FALSE
chr1	39614501	39614813	chr1:39614501-39614813	72.0231	0.146351	FALSE	0.128208	FALSE	-0.341129	FALSE	0.559055	FALSE	-0.137198	FALSE	0.0181743	FALSE
chr1	39615019	39615060	chr1:39615019-39615060	14.3571	-1.1047	FALSE	-0.791871	FALSE	-0.532416	FALSE	-0.34199	FALSE	-0.0568635	FALSE	-0.165074	FALSE
chr1	39622181	39622217	chr1:39622181-39622217	3.55106	0.569931	FALSE	-0.529306	FALSE	-1.41666	FALSE	-0.475607	FALSE	-0.127091	FALSE	-1.10928	FALSE
chr1	39622767	39622811	chr1:39622767-39622811	1.71713	-1.26192	FALSE	3.09501	FALSE	-0.0297283	FALSE	-2.16857	FALSE	1.1445	FALSE	-3.20726	FALSE
chr1	39623911	39623920	chr1:39623911-39623920	3.10658	0.275701	FALSE	-2.11391	FALSE	-0.895795	FALSE	-1.22992	FALSE	0.395419	FALSE	-2.76482	Down
chr1	39636836	39636889	chr1:39636836-39636889	4.97674	-1.89496	FALSE	-0.787765	FALSE	-0.600887	FALSE	-1.93277	FALSE	0.324933	FALSE	-0.399663	FALSE
chr1	39655116	39655236	chr1:39655116-39655236	8.96972	-0.424503	FALSE	0.0196361	FALSE	0.22864	FALSE	-0.869657	FALSE	0.00990242	FALSE	-0.661164	FALSE
chr1	39656856	39657140	chr1:39656856-39657140	7.24512	1.01471	FALSE	0.00373712	FALSE	0.157713	FALSE	-0.635061	FALSE	-0.108139	FALSE	0.970598	FALSE
chr1	39664211	39664350	chr1:39664211-39664350	14.0436	0.538085	FALSE	0.506251	FALSE	0.766248	FALSE	-0.419478	FALSE	-0.652436	FALSE	-1.27295	FALSE
chr1	39670733	39670881	chr1:39670733-39670881	3.67219	-2.30611	FALSE	1.61097	FALSE	-0.146917	FALSE	-1.01523	FALSE	-0.0076618	FALSE	-0.433998	FALSE
chr1	39671375	39671545	chr1:39671375-39671545	16.8985	0.238009	FALSE	0.261186	FALSE	-0.511982	FALSE	0.224353	FALSE	-0.321619	FALSE	-0.0731629	FALSE
chr1	39685975	39686012	chr1:39685975-39686012	4.42793	0.20584	FALSE	0.172126	FALSE	0.379653	FALSE	-0.0973739	FALSE	-0.575201	FALSE	-0.0801445	FALSE
chr1	39690358	39690414	chr1:39690358-39690414	4.54627	0.010401	FALSE	-0.582092	FALSE	-1.12505	FALSE	0.764994	FALSE	0.6144	FALSE	0.148254	FALSE
chr1	39696479	39696561	chr1:39696479-39696561	6.25359	0.311779	FALSE	0.0267448	FALSE	-1.05205	FALSE	0.660784	FALSE	-0.49202	FALSE	-0.0952681	FALSE
chr1	39698698	39698782	chr1:39698698-39698782	3.0516	2.21369	FALSE	1.80584	FALSE	2.7648	Up	1.27395	FALSE	-0.115527	FALSE	-0.386076	FALSE
chr1	39716275	39716613	chr1:39716275-39716613	5.06534	1.60789	FALSE	2.3705	FALSE	1.06966	FALSE	2.12281	Up	-1.08475	FALSE	-2.68975	FALSE
chr1	39718699	39718702	chr1:39718699-39718702	2.97558	0.648055	FALSE	1.51632	FALSE	-0.473277	FALSE	-1.69152	FALSE	-0.357713	FALSE	-2.33746	FALSE
chr1	39729964	39730525	chr1:39729964-39730525	8.3024	0.284743	FALSE	0.694081	FALSE	0.997583	FALSE	1.30853	FALSE	-0.0801596	FALSE	0.32219	FALSE
chr1	39731527	39731743	chr1:39731527-39731743	10.53	-0.474321	FALSE	-0.534497	FALSE	1.08478	FALSE	0.396112	FALSE	-0.0322666	FALSE	0.0496413	FALSE
chr1	39735436	39735439	chr1:39735436-39735439	6.03118	-0.0360389	FALSE	-0.158359	FALSE	-0.148494	FALSE	-0.465597	FALSE	-1.42895	FALSE	-2.72192	Down
chr1	39736480	39736578	chr1:39736480-39736578	24.9411	0.603902	FALSE	0.365264	FALSE	0.855386	FALSE	-0.00563592	FALSE	0.057781	FALSE	0.330533	FALSE
chr1	39745420	39745478	chr1:39745420-39745478	1.90031	3.21759	FALSE	1.29226	FALSE	0.949402	FALSE	0.554458	FALSE	0.0496957	FALSE	0.185435	FALSE
chr1	39752860	39752876	chr1:39752860-39752876	3.86189	1.2159	FALSE	1.19163	FALSE	2.63555	FALSE	2.93457	Up	-1.59766	FALSE	1.37708	FALSE
chr1	39810623	39810850	chr1:39810623-39810850	7.75837	-0.595384	FALSE	0.49347	FALSE	1.45795	FALSE	-0.425407	FALSE	-0.812737	FALSE	-0.855384	FALSE
chr1	39815668	39816029	chr1:39815668-39816029	4.55367	1.00245	FALSE	0.636363	FALSE	1.77915	FALSE	-1.53093	FALSE	-0.250641	FALSE	-0.203681	FALSE
chr1	39831525	39831817	chr1:39831525-39831817	3.05563	-1.85672	FALSE	0.058539	FALSE	0.434733	FALSE	1.53226	FALSE	0.919594	FALSE	2.22994	FALSE
[truncated: 150,394 more rows]
