# Supplementary material for: Emerging cooperativity between Oct4 and Sox2 governs the pluripotency network in early mouse embryos
Source: bioRxiv preprint, doi:10.1101/2023.10.18.562912, version 3 (2024-11-20)
Supplement: Dataset supplement 2. DESeq2 of RNA-seq [file 562912_file07.xlsx]

## Sheet: res_all
									res_Oct4_Ctrl_EarlyICM_vs_Oct4_Ctrl_Morula			res_Sox2_Ctrl_EarlyICM_vs_Sox2_Morula			Oct4_Morula_KO_vs_Ctrl			Oct4_EarlyICM_KO_vs_Ctrl			Oct4_LateICM_KO_vs_Ctrl			Sox2_Morula_KO_vs_Ctrl			Sox2_EarlyICM_KO_vs_Ctrl			Sox2_LateICM_KO_vs_Ctrl
ensembl_gene_id	chr	start	end	strand	external_gene_name	description	gene_biotype	baseMean	log2FoldChange	padj	significance	log2FoldChange	padj	significance	log2FC	padj	significance	log2FC	padj	significance	log2FC	padj	significance	log2FC	padj	significance	log2FC	padj	significance	log2FC	padj	significance
ENSMUSG00000000001	chr3	108107279	108146146	-	Gnai3	guanine nucleotide binding protein (G protein), alpha inhibiting 3 [Source:MGI Symbol;Acc:MGI:95773]	protein_coding	103.1	-0.00957513	0.966423	unchanged	-0.155472	0.307117	unchanged	-0.0153173	0.981889	unchanged	0.000421035	1	unchanged	0.307725	0.0591054	unchanged	-0.0373513	1	unchanged	0.294083	0.110794	unchanged	-0.202133	0.31743	unchanged
ENSMUSG00000000028	chr16	18780446	18811987	-	Cdc45	cell division cycle 45 [Source:MGI Symbol;Acc:MGI:1338073]	protein_coding	54.0795	-0.568738	0.00177819	unchanged	-0.41852	0.0174703	unchanged	0.152222	0.760305	unchanged	-0.226839	0.391847	unchanged	-0.463625	0.0237764	unchanged	-0.243263	1	unchanged	0.056861	0.879622	unchanged	-0.156012	0.578978	unchanged
ENSMUSG00000000031	chr7	142575528	142578143	-	H19	H19, imprinted maternally expressed transcript [Source:MGI Symbol;Acc:MGI:95891]	lncRNA	13.7206	-1.00537	0.796709	unchanged	3.40419	0.267297	unchanged	-1.13885	0.921142	unchanged	-38.0985	3.35945e-47	Down	5.40517	0.0715203	unchanged	1.32954	1	unchanged	-41.4164	1.93345e-58	Down	4.40603	0.229021	unchanged
ENSMUSG00000000037	chrX	161082524	161258213	+	Scml2	Scm polycomb group protein like 2 [Source:MGI Symbol;Acc:MGI:1340042]	protein_coding	0.540731	-0.273565	0.889746	unchanged	1.45236	0.246746	unchanged	-0.355445	NA	unchanged	0.419348	NA	unchanged	-0.0628333	NA	unchanged	-1.37596	1	unchanged	-0.205942	NA	unchanged	0.25661	NA	unchanged
ENSMUSG00000000056	chr11	121237252	121255856	+	Narf	nuclear prelamin A recognition factor [Source:MGI Symbol;Acc:MGI:1914858]	protein_coding	2.48967	0.530018	0.496572	unchanged	0.812627	0.249238	unchanged	-0.0921555	0.977215	unchanged	-0.496058	0.622117	unchanged	0.459957	0.581779	unchanged	1.05813	1	unchanged	0.403886	0.7013	unchanged	1.81229	0.00911407	Up
ENSMUSG00000000058	chr6	17281184	17289115	+	Cav2	caveolin 2 [Source:MGI Symbol;Acc:MGI:107571]	protein_coding	2.12287	-1.73589	0.0234655	Down	-2.6123	0.0006831	Down	1.84235	0.0110087	Up	1.0412	0.314505	unchanged	1.97219	0.124504	unchanged	-0.353887	1	unchanged	-1.77424	0.271653	unchanged	-1.54557	0.344844	unchanged
ENSMUSG00000000078	chr13	5861481	5870394	+	Klf6	Kruppel-like factor 6 [Source:MGI Symbol;Acc:MGI:1346318]	protein_coding	171.835	4.20306	9.97718e-34	Up	3.21827	1.33898e-22	Up	-1.09424	0.1116	unchanged	-0.0299012	0.975194	unchanged	1.29421	0.000207733	Up	-0.206487	1	unchanged	0.500665	0.33035	unchanged	0.803766	0.0527747	unchanged
ENSMUSG00000000085	chr4	120405280	120530186	+	Scmh1	sex comb on midleg homolog 1 [Source:MGI Symbol;Acc:MGI:1352762]	protein_coding	24.5121	0.734318	0.00455397	unchanged	2.14532	9.59398e-18	Up	-0.27188	0.713583	unchanged	-0.247095	0.488626	unchanged	0.25658	0.490406	unchanged	0.0606807	1	unchanged	0.289222	0.415119	unchanged	0.890458	0.00104967	unchanged
ENSMUSG00000000088	chr9	57521273	57532426	+	Cox5a	cytochrome c oxidase subunit 5A [Source:MGI Symbol;Acc:MGI:88474]	protein_coding	947.118	-0.0562489	0.752513	unchanged	-0.321011	0.0178193	unchanged	0.161156	0.617615	unchanged	0.556139	6.45362e-05	unchanged	0.333404	0.0199972	unchanged	0.0571588	1	unchanged	0.24109	0.207804	unchanged	0.0341283	0.90227	unchanged
ENSMUSG00000000093	chr11	85832550	85841948	+	Tbx2	T-box 2 [Source:MGI Symbol;Acc:MGI:98494]	protein_coding	0.909592	-0.32756	0.810923	unchanged	2.02015	0.0662831	unchanged	0.161799	NA	unchanged	-0.541227	0.776467	unchanged	-0.063214	0.974707	unchanged	-0.677667	1	unchanged	0.34992	NA	unchanged	-0.251255	0.890709	unchanged
ENSMUSG00000000094	chr11	85886421	85916097	+	Tbx4	T-box 4 [Source:MGI Symbol;Acc:MGI:102556]	protein_coding	1.33365	1.5797	0.159517	unchanged	2.80811	0.00226576	Up	0.856741	NA	unchanged	-1.39073	0.299161	unchanged	-0.0740174	0.980427	unchanged	-0.900942	1	unchanged	-1.38098	0.22635	unchanged	0.184498	0.92966	unchanged
ENSMUSG00000000120	chr11	95568817	95587735	-	Ngfr	nerve growth factor receptor (TNFR superfamily, member 16) [Source:MGI Symbol;Acc:MGI:97323]	protein_coding	0.284148	0	NA	unchanged	0	1	unchanged	0.365902	NA	unchanged	0	NA	unchanged	-0.0628331	NA	unchanged	0	1	unchanged	0	NA	unchanged	0.210733	NA	unchanged
ENSMUSG00000000125	chr11	103774149	103817957	+	Wnt3	wingless-type MMTV integration site family, member 3 [Source:MGI Symbol;Acc:MGI:98955]	protein_coding	0.394448	-0.653097	0.746921	unchanged	-1.08416	0.533178	unchanged	-0.0296656	NA	unchanged	-0.301999	NA	unchanged	1.01919	NA	unchanged	-0.526478	1	unchanged	-0.26062	NA	unchanged	1.94301	NA	unchanged
ENSMUSG00000000126	chr11	59306927	59333552	+	Wnt9a	wingless-type MMTV integration site family, member 9A [Source:MGI Symbol;Acc:MGI:2446084]	protein_coding	0.66295	0.0852361	0.96749	unchanged	-1.82995	0.184872	unchanged	0.789279	NA	unchanged	0.397711	0.870451	unchanged	0.42324	0.815291	unchanged	0.734236	1	unchanged	0.821401	NA	unchanged	1.96401	NA	unchanged
ENSMUSG00000000127	chr17	63863061	64139496	+	Fer	fer (fms/fps related) protein kinase [Source:MGI Symbol;Acc:MGI:105917]	protein_coding	4.80157	1.90041	0.000379653	Up	0.873081	0.0522647	unchanged	-1.803	0.281956	unchanged	-0.365169	0.558645	unchanged	-0.444808	0.540735	unchanged	0.510945	1	unchanged	-0.295623	0.703807	unchanged	-0.486595	0.455528	unchanged
ENSMUSG00000000131	chr7	126101714	126200501	-	Xpo6	exportin 6 [Source:MGI Symbol;Acc:MGI:2429950]	protein_coding	118.712	-0.382026	0.00321778	unchanged	-0.0288619	0.876795	unchanged	0.0612174	0.897651	unchanged	0.3226	0.0304177	unchanged	0.772161	3.28e-09	unchanged	-0.109955	1	unchanged	0.131323	0.553533	unchanged	0.215079	0.223889	unchanged
ENSMUSG00000000134	chrX	7762559	7775202	+	Tfe3	transcription factor E3 [Source:MGI Symbol;Acc:MGI:98511]	protein_coding	44.8027	-0.472914	0.0674864	unchanged	0.377475	0.143959	unchanged	-0.224385	0.742747	unchanged	-0.799306	0.00636104	unchanged	-0.698348	0.010047	unchanged	0.21841	1	unchanged	-0.561845	0.08563	unchanged	-0.855653	0.00174339	unchanged
ENSMUSG00000000142	chr11	108920348	108950783	+	Axin2	axin 2 [Source:MGI Symbol;Acc:MGI:1270862]	protein_coding	25.5093	2.49868	3.75869e-09	Up	3.51488	8.84275e-19	Up	-0.0764706	0.974435	unchanged	-0.90653	0.0435428	unchanged	-1.00461	0.0319012	Down	-0.603232	1	unchanged	0.600584	0.234403	unchanged	0.709565	0.116216	unchanged
ENSMUSG00000000148	chr5	140705010	140719379	+	Brat1	BRCA1-associated ATM activator 1 [Source:MGI Symbol;Acc:MGI:1891679]	protein_coding	8.79056	-0.0472704	0.934941	unchanged	-0.188343	0.639962	unchanged	-0.0776628	0.960069	unchanged	0.118624	0.862846	unchanged	0.133629	0.835026	unchanged	0.344316	1	unchanged	0.0921543	0.898185	unchanged	-0.000543771	1	unchanged
ENSMUSG00000000149	chr5	140758407	140830431	-	Gna12	guanine nucleotide binding protein, alpha 12 [Source:MGI Symbol;Acc:MGI:95767]	protein_coding	32.1708	-0.298437	0.318354	unchanged	0.165828	0.580968	unchanged	0.0209695	0.990672	unchanged	-1.02377	0.001423	Down	-1.61201	8.14e-11	Down	-0.244577	1	unchanged	-0.0288164	0.962016	unchanged	-0.552601	0.0782284	unchanged
ENSMUSG00000000154	chr7	143473735	143499334	+	Slc22a18	solute carrier family 22 (organic cation transporter), member 18 [Source:MGI Symbol;Acc:MGI:1336884]	protein_coding	0.501661	-0.273565	0.90755	unchanged	1.95496	0.258179	unchanged	-0.355444	NA	unchanged	0	NA	unchanged	-0.423507	NA	unchanged	0	1	unchanged	0.834375	NA	unchanged	-0.455787	NA	unchanged
ENSMUSG00000000167	chr9	50617320	50625000	+	Pih1d2	PIH1 domain containing 2 [Source:MGI Symbol;Acc:MGI:1919864]	protein_coding	1.18625	0.967251	0.331664	unchanged	0.213567	0.863997	unchanged	-1.16486	NA	unchanged	-1.32604	0.286439	unchanged	-1.89248	0.0479626	Down	-0.774902	1	unchanged	0.267457	NA	unchanged	-0.955347	0.416451	unchanged
ENSMUSG00000000168	chr9	50634632	50659780	-	Dlat	dihydrolipoamide S-acetyltransferase (E2 component of pyruvate dehydrogenase complex) [Source:MGI Symbol;Acc:MGI:2385311]	protein_coding	48.1693	0.431449	0.0134437	unchanged	0.313381	0.0551925	unchanged	-0.372631	0.249628	unchanged	-0.149131	0.548108	unchanged	-0.443314	0.0250352	unchanged	-0.0245745	1	unchanged	-0.258113	0.275625	unchanged	0.00260377	0.995626	unchanged
ENSMUSG00000000171	chr9	50596356	50603812	-	Sdhd	succinate dehydrogenase complex, subunit D, integral membrane protein [Source:MGI Symbol;Acc:MGI:1914175]	protein_coding	162.781	1.70486	1.40176e-21	Up	1.84088	5.57149e-28	Up	-0.28707	0.541062	unchanged	-1.09351	3.91704e-09	Down	-0.805387	6.74e-06	unchanged	-0.0476502	1	unchanged	0.501426	0.0185562	unchanged	0.248106	0.296398	unchanged
ENSMUSG00000000184	chr6	127125161	127152193	-	Ccnd2	cyclin D2 [Source:MGI Symbol;Acc:MGI:88314]	protein_coding	1.61999	-1.08701	0.499183	unchanged	-0.062472	0.973729	unchanged	-0.647537	0.889526	unchanged	-1.02154	0.653846	unchanged	-1.46733	0.391077	unchanged	0.316828	1	unchanged	0.577786	0.805425	unchanged	1.53604	0.396544	unchanged
ENSMUSG00000000194	chr2	31152315	31218775	+	Gpr107	G protein-coupled receptor 107 [Source:MGI Symbol;Acc:MGI:2139054]	protein_coding	28.0495	0.939049	2.20637e-07	unchanged	0.866614	3.0956e-07	unchanged	0.0147397	0.995068	unchanged	-0.1799	0.456073	unchanged	-0.254856	0.274582	unchanged	0.0860578	1	unchanged	-0.162993	0.568152	unchanged	0.0892994	0.749733	unchanged
ENSMUSG00000000215	chr7	142678655	142743381	-	Ins2	insulin II [Source:MGI Symbol;Acc:MGI:96573]	protein_coding	0.228957	0	NA	unchanged	0	NA	unchanged	0	NA	unchanged	0	NA	unchanged	0	NA	unchanged	0.404345	1	unchanged	0	NA	unchanged	0	NA	unchanged
ENSMUSG00000000223	chrX	134404550	134456573	+	Drp2	dystrophin related protein 2 [Source:MGI Symbol;Acc:MGI:107432]	protein_coding	0.402119	0.447782	0.839317	unchanged	1.29687	0.48529	unchanged	0.00522893	NA	unchanged	0.0586749	NA	unchanged	-1.32828	NA	unchanged	1.1257	1	unchanged	1.02083	NA	unchanged	0.872494	NA	unchanged
ENSMUSG00000000244	chr7	143005045	143019644	+	Tspan32	tetraspanin 32 [Source:MGI Symbol;Acc:MGI:1350360]	protein_coding	0.334699	0	NA	unchanged	0	1	unchanged	0	NA	unchanged	0	NA	unchanged	0	NA	unchanged	0	1	unchanged	0	NA	unchanged	0	NA	unchanged
ENSMUSG00000000247	chr2	38339280	38369733	+	Lhx2	LIM homeobox protein 2 [Source:MGI Symbol;Acc:MGI:96785]	protein_coding	2.1637	-3.24049	0.0012324	Down	-1.94525	0.0262197	Down	-0.507842	0.84329	unchanged	1.04606	0.513964	unchanged	1.05077	0.514317	unchanged	0.0998264	1	unchanged	0.243227	0.904999	unchanged	-0.742818	0.628029	unchanged
ENSMUSG00000000253	chr13	45507443	45553800	+	Gmpr	guanosine monophosphate reductase [Source:MGI Symbol;Acc:MGI:1913605]	protein_coding	4.7235	-1.80496	0.000249289	Down	0.452799	0.484896	unchanged	0.131765	0.941246	unchanged	-0.0133959	0.99466	unchanged	-0.00276572	1	unchanged	0.443415	1	unchanged	-0.149234	0.898784	unchanged	-0.797585	0.322122	unchanged
ENSMUSG00000000275	chr11	88999375	89020293	+	Trim25	tripartite motif-containing 25 [Source:MGI Symbol;Acc:MGI:102749]	protein_coding	75.6191	0.388624	0.0403584	unchanged	0.473259	0.00961311	unchanged	0.0643489	0.931768	unchanged	-0.0665695	0.839817	unchanged	0.169055	0.472813	unchanged	0.00737741	1	unchanged	0.0493175	0.896309	unchanged	0.22391	0.374475	unchanged
ENSMUSG00000000276	chr11	89035178	89066850	-	Dgke	diacylglycerol kinase, epsilon [Source:MGI Symbol;Acc:MGI:1889276]	protein_coding	18.3516	-0.157269	0.644828	unchanged	-0.443304	0.114501	unchanged	-0.0758363	0.944324	unchanged	-0.362244	0.340127	unchanged	-0.937094	0.00226229	unchanged	0.207399	1	unchanged	0.2205	0.655978	unchanged	-0.386528	0.335523	unchanged
ENSMUSG00000000278	chr11	88924019	88955465	-	Scpep1	serine carboxypeptidase 1 [Source:MGI Symbol;Acc:MGI:1921867]	protein_coding	117.039	-0.0274936	0.89709	unchanged	-0.852709	2.38962e-10	unchanged	0.329627	0.157051	unchanged	1.06188	8.1675e-15	Up	1.06308	4.07e-14	Up	-0.021911	1	unchanged	0.111296	0.684738	unchanged	0.307075	0.0917544	unchanged
ENSMUSG00000000282	chr11	74830919	74845725	+	Mnt	max binding protein [Source:MGI Symbol;Acc:MGI:109150]	protein_coding	23.2479	-0.345006	0.204207	unchanged	1.37743	1.24189e-09	Up	-0.241701	0.706258	unchanged	0.147174	0.724283	unchanged	-0.40198	0.162741	unchanged	0.439126	1	unchanged	-0.299298	0.370536	unchanged	-0.0817788	0.840978	unchanged
ENSMUSG00000000295	chr10	31313382	31328204	+	Hddc2	HD domain containing 2 [Source:MGI Symbol;Acc:MGI:1916942]	protein_coding	16.3384	0.925163	0.00887987	unchanged	0.740769	0.0285905	unchanged	0.371073	0.700445	unchanged	-0.140136	0.800702	unchanged	-0.346426	0.353198	unchanged	-0.0842657	1	unchanged	-0.0432739	0.954282	unchanged	-0.766591	0.0275514	unchanged
ENSMUSG00000000296	chr10	31332375	31445958	-	Tpd52l1	tumor protein D52-like 1 [Source:MGI Symbol;Acc:MGI:1298386]	protein_coding	4.59346	1.12662	0.401821	unchanged	2.98401	0.00371047	Up	-0.355445	0.943145	unchanged	-0.620161	0.745138	unchanged	-2.3661	0.0206305	Down	0.765027	1	unchanged	-0.916195	0.580171	unchanged	-1.53326	0.0511002	unchanged
ENSMUSG00000000301	chr11	59970613	60046489	-	Pemt	phosphatidylethanolamine N-methyltransferase [Source:MGI Symbol;Acc:MGI:104535]	protein_coding	371.695	-1.78729	1.17937e-07	Down	-1.84145	3.91086e-08	Down	0.0558341	0.972162	unchanged	0.54763	0.219488	unchanged	1.60426	9.43e-06	Up	0.141549	1	unchanged	-0.230092	0.729687	unchanged	1.76613	2.05407e-06	Up
ENSMUSG00000000303	chr8	106603350	106670246	+	Cdh1	cadherin 1 [Source:MGI Symbol;Acc:MGI:88354]	protein_coding	191.038	0.506973	0.000303536	unchanged	0.0816161	0.635514	unchanged	0.0400677	0.946478	unchanged	-0.0507155	0.845549	unchanged	0.398234	0.00836275	unchanged	0.16411	1	unchanged	0.538308	0.000761655	unchanged	0.122216	0.582816	unchanged
ENSMUSG00000000305	chr2	179442430	179899373	+	Cdh4	cadherin 4 [Source:MGI Symbol;Acc:MGI:99218]	protein_coding	2.36819	-1.81074	0.131331	unchanged	1.22363	0.118709	unchanged	-0.000743223	1	unchanged	0.0586749	0.98742	unchanged	-2.00203	0.0525665	unchanged	-0.750555	1	unchanged	-0.704206	0.563709	unchanged	-1.34549	0.0764125	unchanged
ENSMUSG00000000308	chr2	121357713	121363737	+	Ckmt1	creatine kinase, mitochondrial 1, ubiquitous [Source:MGI Symbol;Acc:MGI:99441]	protein_coding	54.6156	0.245207	0.374439	unchanged	-0.459532	0.0585026	unchanged	-0.473257	0.283811	unchanged	-0.827425	0.00181312	unchanged	0.492641	0.106559	unchanged	0.363932	1	unchanged	0.163556	0.711672	unchanged	0.602797	0.0342393	unchanged
ENSMUSG00000000318	chr11	70156196	70170834	+	Clec10a	C-type lectin domain family 10, member A [Source:MGI Symbol;Acc:MGI:96975]	protein_coding	3.92209	-4.36474	8.9559e-06	Down	-4.35187	2.67157e-07	Down	-0.0173992	1	unchanged	3.09097	0.00784963	Up	2.52815	0.00894226	Up	0.192506	1	unchanged	1.67395	0.223308	unchanged	3.38111	0.00304396	Up
ENSMUSG00000000320	chr11	70241456	70255353	-	Alox12	arachidonate 12-lipoxygenase [Source:MGI Symbol;Acc:MGI:87998]	protein_coding	16.3937	-0.0743401	0.849527	unchanged	-0.186261	0.602324	unchanged	0.374315	0.543339	unchanged	0.36351	0.321524	unchanged	0.0124935	0.984763	unchanged	0.396739	1	unchanged	-0.172514	0.774121	unchanged	0.0320988	0.960399	unchanged
ENSMUSG00000000325	chr16	18348181	18407076	+	Arvcf	armadillo repeat gene deleted in velocardiofacial syndrome [Source:MGI Symbol;Acc:MGI:109620]	protein_coding	38.5379	-0.577905	0.0307094	unchanged	0.646338	0.00522597	unchanged	-0.588066	0.163349	unchanged	-1.06356	0.000874263	Down	-0.936972	0.00122223	unchanged	0.118397	1	unchanged	-0.134234	0.76014	unchanged	0.60574	0.0269729	unchanged
ENSMUSG00000000326	chr16	18406885	18426852	-	Comt	catechol-O-methyltransferase [Source:MGI Symbol;Acc:MGI:88470]	protein_coding	62.9144	0.387066	0.039705	unchanged	0.0753206	0.757715	unchanged	-0.110773	0.869673	unchanged	0.135563	0.61706	unchanged	0.805459	5.3e-05	unchanged	0.0127109	1	unchanged	0.271167	0.342149	unchanged	0.00949863	0.981117	unchanged
ENSMUSG00000000339	chr3	116488962	116508208	-	Rtca	RNA 3'-terminal phosphate cyclase [Source:MGI Symbol;Acc:MGI:1913618]	protein_coding	46.3109	-0.0467618	0.849527	unchanged	0.284857	0.0966697	unchanged	0.0450572	0.950728	unchanged	-0.558641	0.00849169	unchanged	-0.304958	0.127415	unchanged	0.077037	1	unchanged	-0.185241	0.494761	unchanged	-0.289695	0.193229	unchanged
ENSMUSG00000000340	chr3	116513069	116549981	+	Dbt	dihydrolipoamide branched chain transacylase E2 [Source:MGI Symbol;Acc:MGI:105386]	protein_coding	33.4233	0.720901	0.0010238	unchanged	-1.05537	5.9854e-07	Down	-0.00921998	1	unchanged	-0.449009	0.0835451	unchanged	-0.747364	0.00636295	unchanged	0.0292902	1	unchanged	0.202183	0.623145	unchanged	0.230631	0.524481	unchanged
ENSMUSG00000000346	chr15	100615348	100620761	+	Dazap2	DAZ associated protein 2 [Source:MGI Symbol;Acc:MGI:1344344]	protein_coding	107.413	-1.00009	5.2955e-13	Down	-0.716571	2.88014e-07	unchanged	-0.0709148	0.890978	unchanged	0.925146	2.44947e-10	unchanged	0.942992	2.18e-09	unchanged	0.135079	1	unchanged	0.0845387	0.77434	unchanged	0.358327	0.0640372	unchanged
ENSMUSG00000000355	chrX	38600577	38613426	+	Mcts1	malignant T cell amplified sequence 1 [Source:MGI Symbol;Acc:MGI:1916245]	protein_coding	53.6169	-0.349338	0.161129	unchanged	-0.073499	0.811912	unchanged	-0.0815799	0.92952	unchanged	0.245319	0.446963	unchanged	0.408901	0.127819	unchanged	0.0762038	1	unchanged	0.220041	0.579208	unchanged	0.587639	0.0362621	unchanged
ENSMUSG00000000359	chr2	152626950	152635198	+	Rem1	rad and gem related GTP binding protein 1 [Source:MGI Symbol;Acc:MGI:1097696]	protein_coding	0.554027	-2.79858	0.029794	Down	-3.1934	0.00940749	Down	0.994073	NA	unchanged	-0.301999	NA	unchanged	1.01919	0.603524	unchanged	-0.712924	1	unchanged	0.100054	NA	unchanged	-0.510614	NA	unchanged
ENSMUSG00000000365	chr14	56402580	56525032	+	Rnf17	ring finger protein 17 [Source:MGI Symbol;Acc:MGI:1353419]	protein_coding	14.1726	2.0751	2.89427e-07	Up	1.47647	4.31903e-05	Up	0.593169	0.586918	unchanged	-0.266604	0.607705	unchanged	-1.51112	3.59e-05	Down	-1.36155	1	unchanged	-0.885674	0.0580806	unchanged	-0.718031	0.1216	unchanged
ENSMUSG00000000374	chr10	78186724	78244641	-	Trappc10	trafficking protein particle complex 10 [Source:MGI Symbol;Acc:MGI:1336209]	protein_coding	13.5429	0.222982	0.493666	unchanged	-1.49811	4.53731e-09	Down	-0.15804	0.876096	unchanged	-0.136539	0.765296	unchanged	0.0558445	0.906724	unchanged	-0.443609	1	unchanged	0.0519437	0.943157	unchanged	0.147302	0.757528	unchanged
ENSMUSG00000000378	chr11	6546886	6596744	+	Ccm2	cerebral cavernous malformation 2 [Source:MGI Symbol;Acc:MGI:2384924]	protein_coding	35.1818	0.734018	0.00110498	unchanged	1.40706	6.64624e-13	Up	0.208492	0.759568	unchanged	0.259627	0.347844	unchanged	0.148372	0.582931	unchanged	-0.0873141	1	unchanged	0.136964	0.688181	unchanged	-0.348033	0.158296	unchanged
ENSMUSG00000000384	chr11	6615597	6626067	-	Tbrg4	transforming growth factor beta regulated gene 4 [Source:MGI Symbol;Acc:MGI:1100868]	protein_coding	43.2182	0.627549	0.000127305	unchanged	1.17749	2.17755e-13	Up	0.194997	0.6495	unchanged	0.0539314	0.856594	unchanged	-0.134855	0.578203	unchanged	-0.147625	1	unchanged	-0.346955	0.110438	unchanged	-0.035415	0.922653	unchanged
ENSMUSG00000000385	chr16	97564681	97611195	-	Tmprss2	transmembrane protease, serine 2 [Source:MGI Symbol;Acc:MGI:1354381]	protein_coding	4.11255	2.95036	0.0270676	Up	1.00766	0.498869	unchanged	-0.628346	0.917588	unchanged	-3.02616	0.0479855	Down	0.186688	0.918333	unchanged	0.284877	1	unchanged	2.09325	0.211569	unchanged	-0.266296	0.912217	unchanged
ENSMUSG00000000399	chr6	126821720	126849136	-	Ndufa9	NADH:ubiquinone oxidoreductase subunit A9 [Source:MGI Symbol;Acc:MGI:1913358]	protein_coding	87.599	0.0253551	0.873879	unchanged	0.0558235	0.678424	unchanged	-0.188671	0.405995	unchanged	-0.0189167	0.932188	unchanged	0.351394	0.00886276	unchanged	-0.151792	1	unchanged	0.231917	0.107729	unchanged	0.519004	1.57047e-06	unchanged
ENSMUSG00000000402	chrX	166523006	166585720	-	Egfl6	EGF-like-domain, multiple 6 [Source:MGI Symbol;Acc:MGI:1858599]	protein_coding	0.538421	-0.273564	0.952796	unchanged	0.214853	0.960017	unchanged	-0.355444	NA	unchanged	0	NA	unchanged	-0.729742	NA	unchanged	-0.316993	1	unchanged	-0.260619	NA	unchanged	0	NA	unchanged
ENSMUSG00000000409	chr4	129548343	129573641	-	Lck	lymphocyte protein tyrosine kinase [Source:MGI Symbol;Acc:MGI:96756]	protein_coding	11.9262	-1.65554	6.17555e-05	Down	0.0401552	0.94932	unchanged	0.24148	0.848062	unchanged	-0.575562	0.405598	unchanged	-3.92898	2.01e-05	Down	0.234841	1	unchanged	-1.30329	0.024686	Down	-1.57405	0.0108214	Down
ENSMUSG00000000420	chr18	24205343	24286818	+	Galnt1	polypeptide N-acetylgalactosaminyltransferase 1 [Source:MGI Symbol;Acc:MGI:894693]	protein_coding	49.8191	1.76394	5.2905e-21	Up	1.18023	1.9824e-11	Up	0.0727014	0.93545	unchanged	-0.366201	0.0846822	unchanged	-0.64001	0.00100066	unchanged	0.0441425	1	unchanged	-0.584097	0.00793084	unchanged	-0.379422	0.0982442	unchanged
ENSMUSG00000000439	chr6	115601901	115622624	+	Mkrn2	makorin, ring finger protein, 2 [Source:MGI Symbol;Acc:MGI:1914277]	protein_coding	36.2597	-0.247067	0.270197	unchanged	0.0974391	0.686199	unchanged	0.0807641	0.918073	unchanged	-0.186624	0.543095	unchanged	-0.480802	0.0662485	unchanged	0.107652	1	unchanged	-0.0666928	0.867409	unchanged	-0.120498	0.730081	unchanged
ENSMUSG00000000441	chr6	115618066	115676635	-	Raf1	v-raf-leukemia viral oncogene 1 [Source:MGI Symbol;Acc:MGI:97847]	protein_coding	101.548	0.35042	0.0135392	unchanged	0.585699	1.00765e-05	unchanged	-0.297846	0.238538	unchanged	-0.399337	0.0107104	unchanged	-0.612704	5.23e-05	unchanged	-0.155631	1	unchanged	-0.105615	0.668812	unchanged	-0.347605	0.0356138	unchanged
ENSMUSG00000000486	chr7	127214446	127233130	-	2021-09-01	septin 1 [Source:MGI Symbol;Acc:MGI:1858916]	protein_coding	6.36019	-1.91491	0.00144371	Down	-0.312401	0.609583	unchanged	0.146544	0.932687	unchanged	0.170984	0.901468	unchanged	0.3288	0.554111	unchanged	-0.0790919	1	unchanged	0.369032	0.699813	unchanged	-0.67449	0.382037	unchanged
ENSMUSG00000000489	chr15	79995873	80014977	-	Pdgfb	platelet derived growth factor, B polypeptide [Source:MGI Symbol;Acc:MGI:97528]	protein_coding	2.14195	-3.31253	0.00127615	Down	-0.237427	0.821071	unchanged	-0.348657	0.897883	unchanged	-0.301999	0.901558	unchanged	-0.467925	0.766209	unchanged	-0.235151	1	unchanged	-1.621	0.272188	unchanged	-1.2688	0.385939	unchanged
ENSMUSG00000000530	chr15	101128521	101145336	+	Acvrl1	activin A receptor, type II-like 1 [Source:MGI Symbol;Acc:MGI:1338946]	protein_coding	0.237905	0.808453	NA	unchanged	-0.14582	NA	unchanged	0.365901	NA	unchanged	1.11836	NA	unchanged	2.40277	NA	unchanged	0.0436795	1	unchanged	0	NA	unchanged	0	NA	unchanged
ENSMUSG00000000531	chr15	101224187	101232756	+	Grasp	GRP1 (general receptor for phosphoinositides 1)-associated scaffold protein [Source:MGI Symbol;Acc:MGI:1860303]	protein_coding	3.90286	0.504594	0.482475	unchanged	0.41599	0.508303	unchanged	0.22398	0.928367	unchanged	-0.459835	0.61922	unchanged	-0.730469	0.30541	unchanged	0.296431	1	unchanged	-1.19504	0.169789	unchanged	-0.787482	0.297851	unchanged
ENSMUSG00000000532	chr15	101174066	101213684	+	Acvr1b	activin A receptor, type 1B [Source:MGI Symbol;Acc:MGI:1338944]	protein_coding	11.1257	-0.0380739	0.952796	unchanged	1.93947	1.0087e-06	Up	-0.63353	0.456894	unchanged	-0.355975	0.551242	unchanged	-0.227167	0.629973	unchanged	0.785967	1	unchanged	0.0157913	0.984577	unchanged	-0.129582	0.824123	unchanged
ENSMUSG00000000538	chr11	60226713	60352905	-	Tom1l2	target of myb1-like 2 (chicken) [Source:MGI Symbol;Acc:MGI:2443306]	protein_coding	9.30258	-1.06884	0.00455767	Down	-1.43421	9.12498e-07	Down	0.369813	0.613112	unchanged	1.19523	0.00339663	Up	1.02233	0.00358474	Up	-0.227684	1	unchanged	0.389002	0.483041	unchanged	0.613957	0.185783	unchanged
ENSMUSG00000000544	chr1	166130237	166166510	+	Gpa33	glycoprotein A33 (transmembrane) [Source:MGI Symbol;Acc:MGI:1891703]	protein_coding	16.119	4.96469	1.78579e-08	Up	7.91562	6.72408e-21	Up	-0.716118	0.87158	unchanged	-2.9284	5.96376e-05	Down	-1.30667	0.00797388	Down	1.47981	1	unchanged	-0.576499	0.389961	unchanged	-0.498582	0.431926	unchanged
ENSMUSG00000000552	chr15	103313894	103340093	-	Zfp385a	zinc finger protein 385A [Source:MGI Symbol;Acc:MGI:1352495]	protein_coding	11.0526	-0.94219	0.000800078	unchanged	-0.18944	0.602564	unchanged	0.265992	0.668711	unchanged	-0.729143	0.0788801	unchanged	0.724586	0.0180579	unchanged	-0.320569	1	unchanged	-0.785241	0.0991868	unchanged	0.0686633	0.916734	unchanged
ENSMUSG00000000555	chr15	103344285	103366763	-	Itga5	integrin alpha 5 (fibronectin receptor alpha) [Source:MGI Symbol;Acc:MGI:96604]	protein_coding	16.767	-0.106272	0.829321	unchanged	1.54372	1.75799e-07	Up	0.109454	0.941246	unchanged	-1.71732	0.000540011	Down	-0.712124	0.0686362	unchanged	0.348209	1	unchanged	-0.00953418	0.989831	unchanged	-0.0614049	0.92155	unchanged
ENSMUSG00000000561	chr3	105959368	105970037	+	Wdr77	WD repeat domain 77 [Source:MGI Symbol;Acc:MGI:1917715]	protein_coding	206.219	-0.238553	0.0728189	unchanged	-0.453769	0.000230046	unchanged	0.193244	0.457618	unchanged	0.0791173	0.698235	unchanged	0.435929	0.00192845	unchanged	0.0624056	1	unchanged	0.259662	0.136928	unchanged	-0.163683	0.385324	unchanged
ENSMUSG00000000563	chr3	105942697	105960099	-	Atp5f1	ATP synthase, H+ transporting, mitochondrial F0 complex, subunit B1 [Source:MGI Symbol;Acc:MGI:1100495]	protein_coding	487.567	0.318089	0.000592916	unchanged	-0.246652	0.00691413	unchanged	0.264255	0.0571873	unchanged	0.148513	0.201607	unchanged	0.399404	2.7e-05	unchanged	0.163749	1	unchanged	0.247767	0.03199	unchanged	0.173813	0.146046	unchanged
ENSMUSG00000000568	chr5	99955934	99978938	-	Hnrnpd	heterogeneous nuclear ribonucleoprotein D [Source:MGI Symbol;Acc:MGI:101947]	protein_coding	204.588	0.544231	3.36554e-08	unchanged	-1.10959	2.95034e-31	Down	-0.073636	0.832057	unchanged	-0.0301464	0.874564	unchanged	0.0442948	0.80983	unchanged	0.054951	1	unchanged	0.364497	0.00410193	unchanged	0.457264	0.000113076	unchanged
ENSMUSG00000000579	chr17	6601670	6609774	+	Dynlt1c	dynein light chain Tctex-type 1C [Source:MGI Symbol;Acc:MGI:3807476]	protein_coding	0.782141	-0.595323	0.646357	unchanged	-1.10224	0.349492	unchanged	0.165771	NA	unchanged	0.744738	0.634819	unchanged	0.265197	0.886278	unchanged	-0.477172	1	unchanged	1.40377	NA	unchanged	-1.15403	NA	unchanged
ENSMUSG00000000581	chr11	17257578	17269176	+	C1d	C1D nuclear receptor co-repressor [Source:MGI Symbol;Acc:MGI:1927354]	protein_coding	107.767	-1.12148	6.48496e-21	Down	-1.14672	4.42488e-22	Down	0.333501	0.0571022	unchanged	0.604739	8.12056e-06	unchanged	0.44733	0.00456348	unchanged	0.0307035	1	unchanged	0.215055	0.282534	unchanged	0.0859466	0.731839	unchanged
ENSMUSG00000000594	chr11	55098114	55113029	+	Gm2a	GM2 ganglioside activator protein [Source:MGI Symbol;Acc:MGI:95762]	protein_coding	398.822	0.002908	1	unchanged	-0.454119	0.125055	unchanged	0.394555	0.520019	unchanged	1.85561	5.81358e-12	Up	3.29166	3.93e-37	Up	-0.01948	1	unchanged	1.22717	6.3569e-05	Up	1.28601	9.65374e-06	Up
ENSMUSG00000000600	chr5	3803183	3845564	+	Krit1	KRIT1, ankyrin repeat containing [Source:MGI Symbol;Acc:MGI:1930618]	protein_coding	14.7394	-0.467057	0.165207	unchanged	-0.475053	0.112746	unchanged	0.0486419	0.970028	unchanged	0.170341	0.750485	unchanged	-0.976498	0.00600673	unchanged	-0.162156	1	unchanged	-0.167613	0.778376	unchanged	-1.07284	0.00301196	Down
ENSMUSG00000000605	chr7	7282308	7300851	-	Clcn4	chloride channel, voltage-sensitive 4 [Source:MGI Symbol;Acc:MGI:104571]	protein_coding	8.82029	-1.96501	3.37177e-08	Down	-1.19688	0.000437346	Down	-0.237637	0.802209	unchanged	0.61995	0.231484	unchanged	0.818657	0.167461	unchanged	0.105619	1	unchanged	-0.6818	0.274945	unchanged	-1.00288	0.059062	unchanged
ENSMUSG00000000627	chr6	82911884	82939769	-	Sema4f	sema domain, immunoglobulin domain (Ig), TM domain, and short cytoplasmic domain [Source:MGI Symbol;Acc:MGI:1340055]	protein_coding	0.371363	0.44778	0.931072	unchanged	0.214852	0.96632	unchanged	0	NA	unchanged	-0.301997	NA	unchanged	0.297839	NA	unchanged	-0.316993	1	unchanged	-0.260619	NA	unchanged	0	NA	unchanged
ENSMUSG00000000628	chr6	82725024	82774454	-	Hk2	hexokinase 2 [Source:MGI Symbol;Acc:MGI:1315197]	protein_coding	71.5393	0.519059	0.12001	unchanged	-0.882037	0.00505515	unchanged	-0.370683	0.630391	unchanged	-0.50872	0.191395	unchanged	0.928818	0.00511211	unchanged	0.0277028	1	unchanged	0.767429	0.062115	unchanged	-0.307364	0.524401	unchanged
ENSMUSG00000000631	chr11	77763245	77865980	+	Myo18a	myosin XVIIIA [Source:MGI Symbol;Acc:MGI:2667185]	protein_coding	4.24638	-0.301507	0.734535	unchanged	0.409395	0.554145	unchanged	1.30816	0.152201	unchanged	1.72941	0.0098988	Up	0.726424	0.194261	unchanged	0.171304	1	unchanged	-1.16125	0.243137	unchanged	-0.604897	0.503455	unchanged
ENSMUSG00000000632	chr11	77930799	77979048	+	Sez6	seizure related gene 6 [Source:MGI Symbol;Acc:MGI:104745]	protein_coding	0.0943315	-0.273561	NA	unchanged	0	NA	unchanged	-0.35544	NA	unchanged	0	NA	unchanged	0	NA	unchanged	0.765017	1	unchanged	0	NA	unchanged	0	NA	unchanged
ENSMUSG00000000682	chr4	134082447	134095082	-	Cd52	CD52 antigen [Source:MGI Symbol;Acc:MGI:1346088]	protein_coding	1.08977	-1.18429	0.238742	unchanged	-2.24334	0.0367255	Down	-0.0776539	NA	unchanged	-1.10767	0.500718	unchanged	0.119957	0.947229	unchanged	0.345985	1	unchanged	1.45481	NA	unchanged	0.526569	0.812211	unchanged
ENSMUSG00000000693	chr6	83034172	83052562	+	Loxl3	lysyl oxidase-like 3 [Source:MGI Symbol;Acc:MGI:1337004]	protein_coding	0.944984	-2.27906	0.0243614	Down	-3.26199	0.000565084	Down	-0.40749	NA	unchanged	1.73127	0.176418	unchanged	1.4796	0.23419	unchanged	-0.0993644	1	unchanged	1.18119	NA	unchanged	-0.14793	0.955942	unchanged
ENSMUSG00000000706	chr13	23456991	23465901	-	Btn1a1	butyrophilin, subfamily 1, member A1 [Source:MGI Symbol;Acc:MGI:103118]	protein_coding	0.937575	2.64034	0.0102002	Up	1.50935	0.2264	unchanged	-1.76392	NA	unchanged	-4.26371	0.00016142	Down	-1.35087	0.381519	unchanged	0.0237324	1	unchanged	0.363097	NA	unchanged	0.61644	0.684353	unchanged
ENSMUSG00000000708	chr17	53566860	53672720	+	Kat2b	K(lysine) acetyltransferase 2B [Source:MGI Symbol;Acc:MGI:1343094]	protein_coding	26.9911	1.82584	1.7491e-07	Up	1.19956	9.56232e-05	Up	-0.765635	0.369597	unchanged	-0.748953	0.0544979	unchanged	-1.55849	5.58e-06	Down	-0.490045	1	unchanged	-0.482392	0.29536	unchanged	-0.792745	0.0415548	unchanged
ENSMUSG00000000711	chr10	128677174	128696264	-	Rab5b	RAB5B, member RAS oncogene family [Source:MGI Symbol;Acc:MGI:105938]	protein_coding	42.279	-0.559031	0.00276166	unchanged	0.206272	0.273091	unchanged	0.423053	0.116442	unchanged	0.615288	0.00245861	unchanged	0.429016	0.0278141	unchanged	0.0663151	1	unchanged	-0.208692	0.454141	unchanged	0.0496125	0.893821	unchanged
ENSMUSG00000000730	chr10	78041946	78063622	+	Dnmt3l	DNA (cytosine-5-)-methyltransferase 3-like [Source:MGI Symbol;Acc:MGI:1859287]	protein_coding	84.09	-0.661752	0.0626819	unchanged	-0.202792	0.608481	unchanged	0.185886	0.876196	unchanged	-0.238772	0.660198	unchanged	-0.131685	0.793803	unchanged	0.0284372	1	unchanged	0.230255	0.703882	unchanged	-0.200369	0.718203	unchanged
ENSMUSG00000000731	chr10	78030021	78043610	-	Aire	autoimmune regulator (autoimmune polyendocrinopathy candidiasis ectodermal dystrophy) [Source:MGI Symbol;Acc:MGI:1338803]	protein_coding	4.20978	-2.16275	0.039868	Down	0.214853	0.903843	unchanged	0.520838	0.838688	unchanged	0.780022	0.67397	unchanged	0.21666	0.891753	unchanged	0.0436796	1	unchanged	0.460727	0.845394	unchanged	-1.08784	0.5062	unchanged
ENSMUSG00000000732	chr10	78069301	78083913	+	Icosl	icos ligand [Source:MGI Symbol;Acc:MGI:1354701]	protein_coding	7.06611	0.121382	0.853532	unchanged	1.82385	1.04448e-05	Up	-0.342449	0.832087	unchanged	-1.23291	0.0603363	unchanged	-0.408073	0.54488	unchanged	-0.142833	1	unchanged	0.363073	0.551513	unchanged	-0.00496523	0.996252	unchanged
ENSMUSG00000000738	chr8	123062941	123097760	+	Spg7	SPG7, paraplegin matrix AAA peptidase subunit [Source:MGI Symbol;Acc:MGI:2385906]	protein_coding	27.4049	1.42966	4.54813e-13	Up	1.26696	1.38005e-12	Up	-0.213251	0.771095	unchanged	-0.260647	0.248992	unchanged	-0.0992351	0.712268	unchanged	-0.0783665	1	unchanged	-0.167752	0.557891	unchanged	-0.338088	0.118119	unchanged
ENSMUSG00000000739	chr8	123140191	123158315	-	Sult5a1	sulfotransferase family 5A, member 1 [Source:MGI Symbol;Acc:MGI:1931463]	protein_coding	4.8625	0.0537505	0.941961	unchanged	1.16657	0.00622636	Up	-0.0881495	0.964003	unchanged	0.0111513	0.994038	unchanged	-0.978772	0.0732993	unchanged	-0.191314	1	unchanged	0.0360649	0.970011	unchanged	0.0489444	0.955942	unchanged
ENSMUSG00000000740	chr8	123102349	123105244	+	Rpl13	ribosomal protein L13 [Source:MGI Symbol;Acc:MGI:105922]	protein_coding	3243.74	-0.59735	1.43887e-16	unchanged	0.577944	7.57696e-16	unchanged	0.190348	0.115138	unchanged	0.0939575	0.366903	unchanged	0.138042	0.114806	unchanged	-0.00614626	1	unchanged	0.200306	0.0386981	unchanged	0.157537	0.101572	unchanged
ENSMUSG00000000743	chr8	123204263	123212763	-	Chmp1a	charged multivesicular body protein 1A [Source:MGI Symbol;Acc:MGI:1920159]	protein_coding	27.6575	0.843691	4.75717e-05	unchanged	-0.119229	0.640637	unchanged	0.253337	0.646345	unchanged	0.337588	0.150728	unchanged	0.328965	0.170122	unchanged	-0.0600428	1	unchanged	0.105821	0.799854	unchanged	0.0441542	0.91605	unchanged
ENSMUSG00000000751	chr11	75298165	75348324	-	Rpa1	replication protein A1 [Source:MGI Symbol;Acc:MGI:1915525]	protein_coding	27.5879	2.09939	1.0821e-18	Up	1.12046	1.02486e-07	Up	-0.201815	0.850732	unchanged	-0.931861	3.96443e-05	unchanged	-0.552079	0.0293023	unchanged	0.00312022	1	unchanged	-0.0700308	0.867532	unchanged	-0.228703	0.42984	unchanged
ENSMUSG00000000753	chr11	75409768	75422701	-	Serpinf1	serine (or cysteine) peptidase inhibitor, clade F, member 1 [Source:MGI Symbol;Acc:MGI:108080]	protein_coding	0.659083	0	1	unchanged	0	1	unchanged	0.365902	NA	unchanged	0	1	unchanged	-0.78418	0.806678	unchanged	0.765026	1	unchanged	0.460727	NA	unchanged	-0.853507	NA	unchanged
ENSMUSG00000000759	chr8	12614276	12672248	-	Tubgcp3	tubulin, gamma complex associated protein 3 [Source:MGI Symbol;Acc:MGI:2183752]	protein_coding	30.2927	-0.650663	0.000220499	unchanged	-0.277873	0.107921	unchanged	0.0821349	0.889526	unchanged	0.00592933	0.991589	unchanged	-0.20524	0.388548	unchanged	-0.111775	1	unchanged	0.103871	0.752013	unchanged	-0.217529	0.388963	unchanged
ENSMUSG00000000776	chr14	70438756	70443447	-	Polr3d	polymerase (RNA) III (DNA directed) polypeptide D [Source:MGI Symbol;Acc:MGI:1914315]	protein_coding	39.8049	-0.756355	4.75601e-05	unchanged	-0.452467	0.0186963	unchanged	-0.160433	0.759568	unchanged	0.015501	0.979122	unchanged	-0.488825	0.0421759	unchanged	-0.0788334	1	unchanged	-0.42697	0.128745	unchanged	-0.304856	0.266445	unchanged
ENSMUSG00000000782	chr11	52252370	52283331	-	Tcf7	transcription factor 7, T cell specific [Source:MGI Symbol;Acc:MGI:98507]	protein_coding	7.37106	-1.84454	0.00288938	Down	-0.869564	0.10673	unchanged	0.696004	0.428656	unchanged	1.30786	0.0887505	unchanged	-0.0565459	0.976936	unchanged	-0.0956243	1	unchanged	-0.877643	0.394354	unchanged	-0.555913	0.625709	unchanged
ENSMUSG00000000787	chrX	13280969	13294052	+	Ddx3x	DEAD/H (Asp-Glu-Ala-Asp/His) box polypeptide 3, X-linked [Source:MGI Symbol;Acc:MGI:103064]	protein_coding	575.613	-0.95706	2.23899e-06	unchanged	-0.692889	0.000766915	unchanged	-0.00963954	1	unchanged	0.431553	0.0821737	unchanged	0.0480247	0.886754	unchanged	0.153818	1	unchanged	0.176474	0.636045	unchanged	0.27278	0.364888	unchanged
ENSMUSG00000000791	chr8	70808448	70821424	+	Il12rb1	interleukin 12 receptor, beta 1 [Source:MGI Symbol;Acc:MGI:104579]	protein_coding	1.01142	-3.18316	0.00396221	Down	-2.62861	0.02304	Down	0.462876	NA	unchanged	0.0586749	0.98742	unchanged	0.29784	0.8871	unchanged	0.16717	1	unchanged	0.100054	NA	unchanged	0.571407	0.815217	unchanged
ENSMUSG00000000792	chr8	70882888	70892757	-	Slc5a5	solute carrier family 5 (sodium iodide symporter), member 5 [Source:MGI Symbol;Acc:MGI:2149330]	protein_coding	1.24387	-2.93653	0.0089069	Down	-2.72077	0.0157775	Down	1.70781	NA	unchanged	2.08232	0.158292	unchanged	2.30508	0.0665902	unchanged	0.262564	1	unchanged	1.55307	NA	unchanged	0.210733	0.940023	unchanged
ENSMUSG00000000804	chr11	84984441	85140161	-	Usp32	ubiquitin specific peptidase 32 [Source:MGI Symbol;Acc:MGI:2144475]	protein_coding	31.0115	2.02244	1.74087e-21	Up	1.72455	3.95799e-19	Up	-0.116603	0.912059	unchanged	-0.966747	3.1015e-06	unchanged	-0.280404	0.283272	unchanged	-0.018193	1	unchanged	-0.408439	0.104611	unchanged	-0.209285	0.490305	unchanged
ENSMUSG00000000805	chr11	84957785	84966044	+	Car4	carbonic anhydrase 4 [Source:MGI Symbol;Acc:MGI:1096574]	protein_coding	11.0644	-0.789589	0.335243	unchanged	-1.44693	0.0281778	Down	-0.0263373	1	unchanged	4.25123	7.50076e-11	Up	5.66341	5.64e-11	Up	0.759922	1	unchanged	0.924414	0.36592	unchanged	0.368408	0.801784	unchanged
ENSMUSG00000000811	chr6	89643987	89675529	+	Txnrd3	thioredoxin reductase 3 [Source:MGI Symbol;Acc:MGI:2386711]	protein_coding	1.66876	-2.58557	0.00644378	Down	-2.09948	0.0263077	Down	-1.32005	0.357353	unchanged	-0.662672	0.732428	unchanged	-0.635252	0.67923	unchanged	-0.182079	1	unchanged	1.57395	0.275017	unchanged	-0.508103	0.815217	unchanged
ENSMUSG00000000823	chr2	181582102	181592803	-	Zfp512b	zinc finger protein 512B [Source:MGI Symbol;Acc:MGI:2685478]	protein_coding	3.38012	-0.49489	0.616975	unchanged	0.785804	0.16544	unchanged	0.1114	0.972162	unchanged	0.369784	0.790012	unchanged	-0.642966	0.542513	unchanged	-0.428856	1	unchanged	0.593144	0.41572	unchanged	-0.524853	0.487146	unchanged
ENSMUSG00000000826	chr2	181520484	181555133	+	Dnajc5	DnaJ heat shock protein family (Hsp40) member C5 [Source:MGI Symbol;Acc:MGI:892995]	protein_coding	57.4528	0.778926	1.13128e-07	unchanged	0.569792	0.000121067	unchanged	0.0718643	0.909719	unchanged	-0.346367	0.0445699	unchanged	0.178069	0.383748	unchanged	-0.131095	1	unchanged	0.0160711	0.964769	unchanged	-0.0664676	0.817932	unchanged
ENSMUSG00000000827	chr2	181497141	181517966	+	Tpd52l2	tumor protein D52-like 2 [Source:MGI Symbol;Acc:MGI:1913564]	protein_coding	146.063	-0.487906	1.13439e-09	unchanged	-0.164827	0.0594805	unchanged	0.00552458	0.995603	unchanged	0.0669229	0.617921	unchanged	0.0298215	0.851088	unchanged	0.0830542	1	unchanged	-0.114554	0.410049	unchanged	-0.219853	0.0556555	unchanged
ENSMUSG00000000838	chrX	68678540	68717963	+	Fmr1	fragile X mental retardation 1 [Source:MGI Symbol;Acc:MGI:95564]	protein_coding	94.2138	-0.36001	0.0825573	unchanged	-0.0186806	0.949489	unchanged	0.0314009	0.971436	unchanged	-0.201563	0.480496	unchanged	0.0170958	0.967448	unchanged	0.181214	1	unchanged	0.466611	0.0551495	unchanged	0.0212371	0.958758	unchanged
ENSMUSG00000000876	chr2	154585757	154603708	-	Pxmp4	peroxisomal membrane protein 4 [Source:MGI Symbol;Acc:MGI:1891701]	protein_coding	24.44	-0.36117	0.162463	unchanged	0.958605	2.29763e-05	unchanged	-0.00513586	1	unchanged	0.649911	0.0133513	unchanged	0.694536	0.0029213	unchanged	0.132417	1	unchanged	0.359231	0.247696	unchanged	0.459232	0.106406	unchanged
ENSMUSG00000000881	chrX	100767721	100818410	+	Dlg3	discs large MAGUK scaffold protein 3 [Source:MGI Symbol;Acc:MGI:1888986]	protein_coding	30.645	-0.823504	0.00040705	unchanged	-0.919348	0.000105599	unchanged	0.271985	0.600196	unchanged	1.15583	1.23961e-06	Up	1.71208	9.16e-14	Up	0.17849	1	unchanged	0.952021	0.000798164	unchanged	0.922898	0.000701896	unchanged
ENSMUSG00000000884	chr16	18498712	18566679	+	Gnb1l	guanine nucleotide binding protein (G protein), beta polypeptide 1-like [Source:MGI Symbol;Acc:MGI:1338057]	protein_coding	18.4143	-2.09371	4.56704e-16	Down	-0.632696	0.0169628	unchanged	-0.496771	0.201774	unchanged	-0.24274	0.631573	unchanged	0.00531288	0.997121	unchanged	-0.0412835	1	unchanged	-0.181409	0.739487	unchanged	0.247502	0.58698	unchanged
ENSMUSG00000000901	chr10	75923221	75936496	-	Mmp11	matrix metallopeptidase 11 [Source:MGI Symbol;Acc:MGI:97008]	protein_coding	4.97627	0.0831568	0.934969	unchanged	0.756262	0.223337	unchanged	0.14757	0.955892	unchanged	-0.622183	0.553985	unchanged	-1.73284	0.013467	Down	-0.266694	1	unchanged	-2.3407	0.025254	Down	-2.24637	0.000259554	Down
ENSMUSG00000000902	chr10	75896768	75921617	-	Smarcb1	SWI/SNF related, matrix associated, actin dependent regulator of chromatin, subfamily b, member 1 [Source:MGI Symbol;Acc:MGI:1328366]	protein_coding	57.62	-0.361454	0.0216549	unchanged	0.460031	0.00225199	unchanged	-0.272353	0.335696	unchanged	-0.0660982	0.813482	unchanged	-0.664072	6.13e-05	unchanged	-0.0920389	1	unchanged	-0.22612	0.326918	unchanged	-0.275639	0.144374	unchanged
ENSMUSG00000000903	chr10	75943056	75949657	+	Vpreb3	pre-B lymphocyte gene 3 [Source:MGI Symbol;Acc:MGI:98938]	protein_coding	15.9124	-4.19183	2.03634e-24	Down	-3.18075	1.57281e-13	Down	0.115496	0.933432	unchanged	0.949994	0.100696	unchanged	2.38394	0.0205301	Up	-0.122049	1	unchanged	-0.398349	0.71071	unchanged	-0.791636	0.595972	unchanged
ENSMUSG00000000915	chr5	123973627	124005558	+	Hip1r	huntingtin interacting protein 1 related [Source:MGI Symbol;Acc:MGI:1352504]	protein_coding	5.13941	-0.869795	0.0539874	unchanged	-0.115181	0.844506	unchanged	-0.713369	0.381768	unchanged	-0.617895	0.384484	unchanged	-0.0740195	0.93262	unchanged	0.182665	1	unchanged	-0.164425	0.857789	unchanged	-0.456219	0.463704	unchanged
ENSMUSG00000000916	chr5	135369952	135376805	+	Nsun5	NOL1/NOP2/Sun domain family, member 5 [Source:MGI Symbol;Acc:MGI:2140844]	protein_coding	43.3346	-0.718557	9.77671e-06	unchanged	-0.248821	0.148003	unchanged	0.164994	0.680508	unchanged	0.0922068	0.754303	unchanged	0.00508304	0.99259	unchanged	-0.0208316	1	unchanged	-0.132101	0.665685	unchanged	0.401398	0.0858241	unchanged
ENSMUSG00000000934	chr15	75657034	75678800	-	Top1mt	DNA topoisomerase 1, mitochondrial [Source:MGI Symbol;Acc:MGI:1920210]	protein_coding	1.90749	-1.59535	0.0396267	Down	-3.35793	0.000346787	Down	0.434336	0.813189	unchanged	-0.135403	0.940415	unchanged	-0.495424	0.728044	unchanged	-0.299898	1	unchanged	0.460727	0.849118	unchanged	-0.237941	0.881818	unchanged
ENSMUSG00000000938	chr6	52231196	52240854	-	Hoxa10	homeobox A10 [Source:MGI Symbol;Acc:MGI:96171]	protein_coding	0.635507	-2.5253	0.173292	unchanged	-4.54334	0.00528351	Down	-0.134716	NA	unchanged	0	1	unchanged	0	1	unchanged	-2.15222	1	unchanged	0.460727	NA	unchanged	-0.850582	NA	unchanged
ENSMUSG00000000957	chr14	54431611	54445364	+	Mmp14	matrix metallopeptidase 14 (membrane-inserted) [Source:MGI Symbol;Acc:MGI:101900]	protein_coding	1.63182	1.02816	0.439277	unchanged	-1.66285	0.159178	unchanged	-0.355445	0.943145	unchanged	0.0544739	0.98742	unchanged	-0.423507	0.827484	unchanged	-2.1947	1	unchanged	0.821401	0.717235	unchanged	-0.14994	0.955942	unchanged
ENSMUSG00000000958	chr14	54369441	54417780	-	Slc7a7	solute carrier family 7 (cationic amino acid transporter, y+ system), member 7 [Source:MGI Symbol;Acc:MGI:1337120]	protein_coding	20.0942	0.142586	0.821178	unchanged	0.267327	0.642582	unchanged	0.437193	0.719105	unchanged	-1.76131	0.00243727	Down	-1.37405	0.00238446	Down	-0.0458518	1	unchanged	0.0940318	0.928873	unchanged	-1.12283	0.0363238	Down
ENSMUSG00000000959	chr14	54360833	54369673	+	Oxa1l	oxidase assembly 1-like [Source:MGI Symbol;Acc:MGI:1916339]	protein_coding	59.4569	0.212979	0.241358	unchanged	0.413276	0.0106322	unchanged	-0.0490013	0.943145	unchanged	-0.144133	0.550662	unchanged	-0.0644103	0.811598	unchanged	-0.0221936	1	unchanged	-0.252243	0.296617	unchanged	0.135914	0.607643	unchanged
ENSMUSG00000000976	chr11	83753695	83783754	+	Heatr6	HEAT repeat containing 6 [Source:MGI Symbol;Acc:MGI:1919790]	protein_coding	14.1103	0.459957	0.140835	unchanged	0.0915328	0.813997	unchanged	-0.122109	0.920652	unchanged	0.257423	0.519193	unchanged	-0.400144	0.275268	unchanged	-0.256096	1	unchanged	-0.276919	0.601936	unchanged	-0.363289	0.42655	unchanged
ENSMUSG00000001014	chr9	21029372	21030595	+	Icam4	intercellular adhesion molecule 4, Landsteiner-Wiener blood group [Source:MGI Symbol;Acc:MGI:1925619]	protein_coding	8.16429	-2.0794	3.82357e-06	Down	-1.05585	0.024051	Down	0.398568	0.692254	unchanged	2.16244	6.37165e-06	Up	2.09645	1.88e-05	Up	-0.239374	1	unchanged	0.0588115	0.961218	unchanged	0.51111	0.566414	unchanged
ENSMUSG00000001016	chr3	90476125	90488379	+	Ilf2	interleukin enhancer binding factor 2 [Source:MGI Symbol;Acc:MGI:1915031]	protein_coding	84.5004	0.803882	1.8182e-09	unchanged	0.434481	0.000880161	unchanged	0.127679	0.762831	unchanged	-0.494178	0.000828076	unchanged	-0.658803	9.54e-06	unchanged	0.0632289	1	unchanged	-0.0843766	0.73456	unchanged	-0.40073	0.00919349	unchanged
ENSMUSG00000001017	chr3	90498955	90509498	-	Chtop	chromatin target of PRMT1 [Source:MGI Symbol;Acc:MGI:1913761]	protein_coding	98.4697	0.499087	7.46505e-05	unchanged	-0.35121	0.00553642	unchanged	0.05234	0.922032	unchanged	-0.4315	0.00204236	unchanged	-0.401488	0.00340725	unchanged	-0.140567	1	unchanged	0.00956019	0.975325	unchanged	-0.777626	4.36801e-09	unchanged
ENSMUSG00000001018	chr3	90488025	90491033	-	Snapin	SNAP-associated protein [Source:MGI Symbol;Acc:MGI:1333745]	protein_coding	30.6084	-0.367987	0.0802916	unchanged	0.533811	0.00902003	unchanged	0.0709598	0.926906	unchanged	0.498903	0.0274521	unchanged	0.327141	0.169935	unchanged	-0.078559	1	unchanged	0.238914	0.439771	unchanged	0.120365	0.723793	unchanged
ENSMUSG00000001020	chr3	90603770	90606045	+	S100a4	S100 calcium binding protein A4 [Source:MGI Symbol;Acc:MGI:1330282]	protein_coding	0.285373	0	NA	unchanged	0	1	unchanged	0.365892	NA	unchanged	0	NA	unchanged	0	NA	unchanged	0	1	unchanged	0	NA	unchanged	0	NA	unchanged
ENSMUSG00000001025	chr3	90612881	90624181	+	S100a6	S100 calcium binding protein A6 (calcyclin) [Source:MGI Symbol;Acc:MGI:1339467]	protein_coding	16.903	-2.68731	0.00345826	Down	0.338496	0.626182	unchanged	0.752389	0.602986	unchanged	1.42386	0.259519	unchanged	0.165943	0.857764	unchanged	-0.366664	1	unchanged	-0.745717	0.422596	unchanged	-1.29751	0.0463263	Down
ENSMUSG00000001029	chr11	106377655	106388075	-	Icam2	intercellular adhesion molecule 2 [Source:MGI Symbol;Acc:MGI:96394]	protein_coding	1.4952	1.4132	0.236943	unchanged	3.31578	0.000938219	Up	-1.43124	NA	unchanged	-1.62186	0.239534	unchanged	-4.54905	4.46e-06	Down	1.06543	1	unchanged	-0.359676	0.806409	unchanged	-0.247373	0.85808	unchanged
ENSMUSG00000001034	chr11	61488811	61494406	-	Mapk7	mitogen-activated protein kinase 7 [Source:MGI Symbol;Acc:MGI:1346347]	protein_coding	24.6846	-0.993446	0.00092269	unchanged	1.04694	7.99622e-05	Up	-0.257682	0.749032	unchanged	-1.32454	0.00116057	Down	-1.06034	0.00240825	Down	0.245213	1	unchanged	-0.4866	0.205604	unchanged	-0.820356	0.0100538	unchanged
ENSMUSG00000001036	chr11	61517248	61579687	-	Epn2	epsin 2 [Source:MGI Symbol;Acc:MGI:1333766]	protein_coding	31.4431	-0.788891	0.0022373	unchanged	0.0398003	0.916539	unchanged	0.214818	0.759833	unchanged	-0.215203	0.604634	unchanged	-0.371133	0.263019	unchanged	-0.19763	1	unchanged	-0.209379	0.647734	unchanged	-0.503398	0.130318	unchanged
ENSMUSG00000001039	chr11	61505143	61512931	+	B9d1	B9 protein domain 1 [Source:MGI Symbol;Acc:MGI:1351471]	protein_coding	8.86242	1.25529	0.00540162	Up	1.35567	0.00469769	Up	-0.0506734	0.985992	unchanged	-1.66909	0.00194908	Down	-1.42938	0.000380681	Down	0.235766	1	unchanged	0.0279057	0.976943	unchanged	-1.04013	0.011237	Down
ENSMUSG00000001052	chr3	129982758	130061553	-	Sec24b	Sec24 related gene family, member B (S. cerevisiae) [Source:MGI Symbol;Acc:MGI:2139764]	protein_coding	30.7407	-0.517394	0.0104498	unchanged	-0.0828335	0.715614	unchanged	0.0958627	0.887175	unchanged	-0.433046	0.109237	unchanged	-0.527559	0.0184883	unchanged	-0.187916	1	unchanged	-0.133674	0.698448	unchanged	-0.265443	0.301011	unchanged
ENSMUSG00000001053	chr11	51643062	51650842	-	N4bp3	NEDD4 binding protein 3 [Source:MGI Symbol;Acc:MGI:2442218]	protein_coding	10.874	-1.18212	0.00516878	Down	0.935728	0.0202735	unchanged	0.180985	0.897651	unchanged	0.054221	0.95984	unchanged	-0.254366	0.707144	unchanged	-0.422525	1	unchanged	-1.42712	0.00589977	Down	-0.954987	0.0752325	unchanged
ENSMUSG00000001054	chr11	51623670	51635896	-	Rmnd5b	required for meiotic nuclear division 5 homolog B [Source:MGI Symbol;Acc:MGI:1913339]	protein_coding	72.7782	-2.51345	1.30105e-35	Down	-1.65189	1.57458e-17	Down	-0.0401438	0.961552	unchanged	0.602813	0.0204428	unchanged	0.280921	0.312364	unchanged	-0.430509	1	unchanged	-0.287681	0.412284	unchanged	-0.0457092	0.928299	unchanged
ENSMUSG00000001056	chr11	51619734	51623714	+	Nhp2	NHP2 ribonucleoprotein [Source:MGI Symbol;Acc:MGI:1098547]	protein_coding	599.746	-1.77448	1.04484e-64	Down	-0.932594	1.68168e-18	unchanged	-0.0150124	0.976583	unchanged	0.365074	0.00367585	unchanged	0.213832	0.118835	unchanged	0.0350805	1	unchanged	-0.23006	0.153039	unchanged	-0.169887	0.300561	unchanged
ENSMUSG00000001062	chr8	123242355	123254348	-	Vps9d1	VPS9 domain containing 1 [Source:MGI Symbol;Acc:MGI:1914143]	protein_coding	7.11644	0.0489404	0.945165	unchanged	1.58224	7.86489e-06	Up	0.191734	0.907194	unchanged	0.481602	0.390662	unchanged	-0.156149	0.804189	unchanged	0.202787	1	unchanged	-0.260173	0.64492	unchanged	-0.640355	0.121554	unchanged
ENSMUSG00000001065	chr8	123254194	123269745	+	Zfp276	zinc finger protein (C2H2 type) 276 [Source:MGI Symbol;Acc:MGI:1888495]	protein_coding	7.40338	1.04124	0.00263001	Up	0.0502594	0.916035	unchanged	0.00671155	1	unchanged	-0.416348	0.326018	unchanged	-0.456425	0.315384	unchanged	-0.363872	1	unchanged	0.0152129	0.984577	unchanged	0.0291847	0.963875	unchanged
ENSMUSG00000001076	chr15	99084085	99087817	-	C1ql4	complement component 1, q subcomponent-like 4 [Source:MGI Symbol;Acc:MGI:3579909]	protein_coding	7.46972	-0.23226	0.722843	unchanged	-0.455075	0.427834	unchanged	-2.22698	0.00282162	Down	-5.39987	7.38594e-09	Down	-1.92683	0.127267	unchanged	-0.40848	1	unchanged	0.328719	0.728647	unchanged	1.8183	0.001636	Up
ENSMUSG00000001082	chr5	34633641	34637212	-	Mfsd10	major facilitator superfamily domain containing 10 [Source:MGI Symbol;Acc:MGI:1915544]	protein_coding	51.9174	-0.747445	3.78128e-05	unchanged	0.566592	0.00153593	unchanged	-0.152929	0.765034	unchanged	-0.595508	0.00982392	unchanged	-0.416622	0.0644968	unchanged	0.244782	1	unchanged	-0.270233	0.320973	unchanged	-0.546214	0.0110763	unchanged
ENSMUSG00000001089	chr4	136469760	136554780	+	Luzp1	leucine zipper protein 1 [Source:MGI Symbol;Acc:MGI:107629]	protein_coding	32.1641	-1.42455	1.92067e-11	Down	-1.51304	5.87357e-13	Down	0.232092	0.637712	unchanged	-0.452412	0.149233	unchanged	0.306556	0.374199	unchanged	-0.0968777	1	unchanged	-0.30132	0.462024	unchanged	-0.317702	0.374789	unchanged
ENSMUSG00000001095	chr11	78397086	78422217	-	Slc13a2	solute carrier family 13 (sodium-dependent dicarboxylate transporter), member 2 [Source:MGI Symbol;Acc:MGI:1276558]	protein_coding	19.656	-1.39709	8.28589e-05	Down	-1.13662	0.00110291	Down	0.0619682	0.965271	unchanged	1.75872	1.74982e-06	Up	1.68301	1.29e-05	Up	-0.203095	1	unchanged	1.05518	0.0166014	Up	1.22717	0.00207065	Up
ENSMUSG00000001098	chr5	114363566	114380508	-	Kctd10	potassium channel tetramerisation domain containing 10 [Source:MGI Symbol;Acc:MGI:2141207]	protein_coding	69.5387	-0.648658	1.6563e-05	unchanged	-0.759996	2.19918e-07	unchanged	-0.0958052	0.857803	unchanged	-0.11088	0.662232	unchanged	0.659055	0.000447432	unchanged	-0.0942932	1	unchanged	-0.0816585	0.797406	unchanged	0.519542	0.00909228	unchanged
ENSMUSG00000001100	chr11	78512192	78522736	+	Poldip2	polymerase (DNA-directed), delta interacting protein 2 [Source:MGI Symbol;Acc:MGI:1915061]	protein_coding	68.9175	0.104115	0.611193	unchanged	1.65395	2.14808e-27	Up	-0.220607	0.568829	unchanged	0.169643	0.454459	unchanged	-0.211637	0.308445	unchanged	0.271283	1	unchanged	-0.131035	0.620202	unchanged	0.161848	0.475748	unchanged
ENSMUSG00000001103	chr11	78503446	78505081	+	Sebox	SEBOX homeobox [Source:MGI Symbol;Acc:MGI:108012]	protein_coding	0.275777	-2.01426	NA	unchanged	-2.13041	NA	unchanged	-0.442987	NA	unchanged	-0.301998	NA	unchanged	0	NA	unchanged	-1.94091	1	unchanged	1.10874	NA	unchanged	-0.14994	NA	unchanged
ENSMUSG00000001105	chr11	78536360	78541737	+	Ift20	intraflagellar transport 20 [Source:MGI Symbol;Acc:MGI:1915585]	protein_coding	53.8294	0.255813	0.227523	unchanged	0.343861	0.0768028	unchanged	0.22238	0.633964	unchanged	0.586474	0.00346391	unchanged	0.828719	1.99e-05	unchanged	0.194645	1	unchanged	0.300524	0.261902	unchanged	0.225313	0.415156	unchanged
ENSMUSG00000001120	chr10	76761856	76961887	-	Pcbp3	poly(rC) binding protein 3 [Source:MGI Symbol;Acc:MGI:1890470]	protein_coding	1.51363	-1.84676	0.0398309	Down	0.350036	0.638477	unchanged	-0.560248	NA	unchanged	0.0577749	0.98742	unchanged	1.28816	0.30628	unchanged	-0.811352	1	unchanged	-0.889265	0.415602	unchanged	0.672241	0.603271	unchanged
ENSMUSG00000001123	chr11	78962973	78984946	-	Lgals9	lectin, galactose binding, soluble 9 [Source:MGI Symbol;Acc:MGI:109496]	protein_coding	46.7447	0.0689833	0.93665	unchanged	-0.44123	0.482207	unchanged	-1.12872	0.249628	unchanged	-3.33779	1.3233e-07	Down	-0.083118	0.928503	unchanged	0.28876	1	unchanged	1.11372	0.124656	unchanged	0.884222	0.215493	unchanged
ENSMUSG00000001127	chrX	20797813	20860519	+	Araf	Araf proto-oncogene, serine/threonine kinase [Source:MGI Symbol;Acc:MGI:88065]	protein_coding	56.0792	-0.620563	0.00510678	unchanged	0.781151	0.000331008	unchanged	0.118643	0.877464	unchanged	0.343656	0.225255	unchanged	0.617615	0.00849872	unchanged	0.0902666	1	unchanged	0.125938	0.761421	unchanged	0.32259	0.288334	unchanged
ENSMUSG00000001128	chrX	20925453	20931555	-	Cfp	complement factor properdin [Source:MGI Symbol;Acc:MGI:97545]	protein_coding	1.98724	1.1766	0.155291	unchanged	1.34569	0.0437995	Up	-0.987315	0.722538	unchanged	-0.32293	0.77571	unchanged	-0.856496	0.419365	unchanged	-0.0797928	1	unchanged	-0.198769	0.863699	unchanged	-1.44932	0.0561346	unchanged
ENSMUSG00000001131	chrX	20870165	20874735	+	Timp1	tissue inhibitor of metalloproteinase 1 [Source:MGI Symbol;Acc:MGI:98752]	protein_coding	17.835	2.22291	0.000213892	Up	5.26032	1.1778e-09	Up	-0.30793	0.916067	unchanged	-2.65695	0.000146349	Down	-4.66682	1.44e-12	Down	0.853468	1	unchanged	-1.062	0.124711	unchanged	-2.13904	5.0335e-05	Down
ENSMUSG00000001134	chrX	20941721	20962017	-	Uxt	ubiquitously expressed prefoldin like chaperone [Source:MGI Symbol;Acc:MGI:1277988]	protein_coding	70.9961	-1.48997	1.23988e-12	Down	-0.387406	0.0984431	unchanged	-0.230479	0.674496	unchanged	-0.1051	0.791227	unchanged	-0.163103	0.613983	unchanged	-0.0135975	1	unchanged	0.178728	0.660013	unchanged	-0.416911	0.164509	unchanged
ENSMUSG00000001138	chr1	36511866	36528237	+	Cnnm3	cyclin M3 [Source:MGI Symbol;Acc:MGI:2151055]	protein_coding	10.9691	-0.200238	0.563545	unchanged	-1.08452	0.000213178	Down	-0.193747	0.833687	unchanged	0.142376	0.767595	unchanged	-0.610245	0.11354	unchanged	-0.318339	1	unchanged	0.374877	0.486092	unchanged	0.179673	0.704577	unchanged
ENSMUSG00000001143	chr1	36419870	36445271	-	Lman2l	lectin, mannose-binding 2-like [Source:MGI Symbol;Acc:MGI:2443010]	protein_coding	8.84939	1.13628	0.00681715	Up	0.791264	0.019646	unchanged	0.534258	0.6118	unchanged	-0.493526	0.330236	unchanged	-0.647801	0.0877286	unchanged	0.029789	1	unchanged	0.0755164	0.911556	unchanged	-0.288875	0.530538	unchanged
ENSMUSG00000001150	chr10	76468926	76515857	+	Mcm3ap	minichromosome maintenance complex component 3 associated protein [Source:MGI Symbol;Acc:MGI:1930089]	protein_coding	25.3972	0.647695	0.0142681	unchanged	0.31892	0.26945	unchanged	-0.207168	0.809163	unchanged	-0.628646	0.0360466	unchanged	0.338949	0.318188	unchanged	-0.337258	1	unchanged	-0.337492	0.423263	unchanged	0.25646	0.539533	unchanged
ENSMUSG00000001151	chr10	76351262	76442786	-	Pcnt	pericentrin (kendrin) [Source:MGI Symbol;Acc:MGI:102722]	protein_coding	23.6603	0.48573	0.0290737	unchanged	0.212961	0.356189	unchanged	0.0594774	0.949003	unchanged	-0.0973431	0.783691	unchanged	-0.552203	0.0191463	unchanged	0.00854223	1	unchanged	-0.059627	0.891299	unchanged	-0.223176	0.491144	unchanged
ENSMUSG00000001156	chr6	86647041	86669161	-	Mxd1	MAX dimerization protein 1 [Source:MGI Symbol;Acc:MGI:96908]	protein_coding	3.81319	0.692893	0.314028	unchanged	1.49819	0.0132395	Up	-0.77954	0.668711	unchanged	1.01035	0.109605	unchanged	0.000489143	1	unchanged	0.572577	1	unchanged	0.681502	0.373391	unchanged	-0.29929	0.753325	unchanged
ENSMUSG00000001157	chr6	86691767	86733383	-	Gmcl1	germ cell-less, spermatogenesis associated 1 [Source:MGI Symbol;Acc:MGI:1345156]	protein_coding	19.0033	0.0776365	0.797929	unchanged	-0.194955	0.451251	unchanged	-0.0139444	0.997712	unchanged	-0.361926	0.217047	unchanged	-0.648491	0.0133123	unchanged	-0.0268234	1	unchanged	0.207295	0.605039	unchanged	-0.717404	0.0132911	unchanged
ENSMUSG00000001158	chr6	86675150	86684522	-	Snrnp27	small nuclear ribonucleoprotein 27 (U4/U6.U5) [Source:MGI Symbol;Acc:MGI:1913868]	protein_coding	86.3961	0.649965	8.95218e-08	unchanged	0.376215	0.00175715	unchanged	-0.355742	0.0960475	unchanged	0.0982788	0.58379	unchanged	0.0308261	0.879946	unchanged	-0.048521	1	unchanged	-0.0603473	0.798632	unchanged	-0.184633	0.265514	unchanged
ENSMUSG00000001166	chr5	120800193	120812514	-	Oas1c	2'-5' oligoadenylate synthetase 1C [Source:MGI Symbol;Acc:MGI:2149633]	protein_coding	1.78041	0.0896361	0.94488	unchanged	1.75669	0.0138635	Up	0.451142	0.869673	unchanged	-1.76038	0.159151	unchanged	-0.874005	0.537539	unchanged	-0.293492	1	unchanged	-0.853971	0.391776	unchanged	1.70033	0.0908553	unchanged
ENSMUSG00000001173	chrX	47912386	47965868	+	Ocrl	OCRL, inositol polyphosphate-5-phosphatase [Source:MGI Symbol;Acc:MGI:109589]	protein_coding	42.4248	-0.560419	0.00365623	unchanged	0.0886527	0.720182	unchanged	-0.238733	0.588476	unchanged	0.351694	0.141806	unchanged	0.531623	0.0120629	unchanged	0.135208	1	unchanged	0.377207	0.152601	unchanged	0.249186	0.385614	unchanged
ENSMUSG00000001175	chr12	100199434	100209814	+	Calm1	calmodulin 1 [Source:MGI Symbol;Acc:MGI:88251]	protein_coding	738.415	1.18183	4.16554e-14	Up	0.247452	0.165939	unchanged	-0.166551	0.70828	unchanged	0.0896392	0.742586	unchanged	1.29931	3.78e-16	Up	0.164698	1	unchanged	0.703314	0.000143203	unchanged	0.582691	0.00152365	unchanged
ENSMUSG00000001211	chr10	78269177	78352489	-	Agpat3	1-acylglycerol-3-phosphate O-acyltransferase 3 [Source:MGI Symbol;Acc:MGI:1336186]	protein_coding	12.3516	0.676299	0.111471	unchanged	1.53334	1.10535e-05	Up	-1.03275	0.209697	unchanged	-1.25852	0.00967158	Down	-1.45966	0.000384715	Down	0.275507	1	unchanged	-0.0973296	0.887688	unchanged	0.0425722	0.955057	unchanged
ENSMUSG00000001227	chr17	56123084	56140343	-	Sema6b	sema domain, transmembrane domain (TM), and cytoplasmic domain, (semaphorin) 6B [Source:MGI Symbol;Acc:MGI:1202889]	protein_coding	1.84014	0.383934	0.676591	unchanged	1.90283	0.043474	Up	0.518446	0.816943	unchanged	-0.778374	0.480468	unchanged	-0.653718	0.613821	unchanged	0.0420497	1	unchanged	-0.323317	0.823317	unchanged	-1.24008	0.29729	unchanged
ENSMUSG00000001228	chr17	56303320	56323486	+	Uhrf1	ubiquitin-like, containing PHD and RING finger domains, 1 [Source:MGI Symbol;Acc:MGI:1338889]	protein_coding	46.227	2.86076	7.60775e-20	Up	3.38414	1.89735e-28	Up	-1.13559	0.0842156	unchanged	-3.10064	2.95396e-20	Down	-1.6179	1.19e-07	Down	0.423003	1	unchanged	-0.765419	0.0352214	unchanged	-1.08143	0.000738151	Down
ENSMUSG00000001229	chr17	56186806	56218905	-	Dpp9	dipeptidylpeptidase 9 [Source:MGI Symbol;Acc:MGI:2443967]	protein_coding	11.8943	0.599777	0.0659449	unchanged	1.17671	7.25117e-05	Up	-0.518244	0.506145	unchanged	-0.160786	0.743018	unchanged	0.421663	0.183653	unchanged	0.0894369	1	unchanged	0.208475	0.660325	unchanged	0.44371	0.173266	unchanged
ENSMUSG00000001240	chr11	101246027	101259546	+	Ramp2	receptor (calcitonin) activity modifying protein 2 [Source:MGI Symbol;Acc:MGI:1859650]	protein_coding	2.12324	-0.260542	0.812919	unchanged	0.418419	0.63181	unchanged	-0.585495	0.823708	unchanged	-1.1847	0.357895	unchanged	-1.08715	0.315254	unchanged	-0.822604	1	unchanged	-0.516915	0.705751	unchanged	-0.202773	0.881818	unchanged
ENSMUSG00000001247	chr7	30957769	30973464	-	Lsr	lipolysis stimulated lipoprotein receptor [Source:MGI Symbol;Acc:MGI:1927471]	protein_coding	48.3931	1.48472	2.83401e-10	Up	1.03592	4.67751e-06	Up	-0.03442	0.977215	unchanged	-0.337832	0.260368	unchanged	0.990065	8.09e-05	unchanged	0.356837	1	unchanged	0.307391	0.378428	unchanged	0.412686	0.161691	unchanged
ENSMUSG00000001248	chr7	31130126	31155896	-	Gramd1a	GRAM domain containing 1A [Source:MGI Symbol;Acc:MGI:105490]	protein_coding	13.8331	1.60374	0.0311436	Up	3.93396	3.24868e-10	Up	-0.86752	0.755858	unchanged	-3.34464	0.000841886	Down	-4.25604	2.17e-11	Down	0.678405	1	unchanged	-1.32685	0.0188604	Down	-1.5673	0.00101303	Down
ENSMUSG00000001249	chr7	31098724	31115290	-	Hpn	hepsin [Source:MGI Symbol;Acc:MGI:1196620]	protein_coding	2.87259	1.16913	0.419612	unchanged	4.41832	3.07063e-06	Up	0.365902	0.943145	unchanged	-1.02335	0.578086	unchanged	-0.499703	0.747197	unchanged	0	1	unchanged	0.350604	0.77608	unchanged	0.487847	0.675378	unchanged
ENSMUSG00000001270	chr12	111669360	111672338	-	Ckb	creatine kinase, brain [Source:MGI Symbol;Acc:MGI:88407]	protein_coding	341.049	0.368925	0.114955	unchanged	0.806804	0.000158483	unchanged	0.661045	0.0351452	unchanged	0.437865	0.090441	unchanged	0.973801	9.01e-06	unchanged	0.104918	1	unchanged	-1.13419	1.71723e-06	Down	-2.14187	3.09323e-22	Down
ENSMUSG00000001280	chr15	102406142	102436404	+	Sp1	trans-acting transcription factor 1 [Source:MGI Symbol;Acc:MGI:98372]	protein_coding	96.6169	0.123366	0.540689	unchanged	-0.754566	2.67065e-06	unchanged	0.190246	0.638442	unchanged	-0.210037	0.345683	unchanged	-0.196075	0.370001	unchanged	0.00926632	1	unchanged	0.154326	0.61131	unchanged	-0.0249648	0.947673	unchanged
ENSMUSG00000001281	chr15	102215994	102231944	-	Itgb7	integrin beta 7 [Source:MGI Symbol;Acc:MGI:96616]	protein_coding	4.5113	-1.18698	0.074872	unchanged	-0.51686	0.481465	unchanged	0.226916	0.924718	unchanged	0.575295	0.546698	unchanged	0.6616	0.660261	unchanged	-0.0119781	1	unchanged	-1.32142	0.206042	unchanged	-0.216536	0.874016	unchanged
ENSMUSG00000001285	chr15	102331708	102338139	+	Myg1	melanocyte proliferating gene 1 [Source:MGI Symbol;Acc:MGI:1929864]	protein_coding	20.4502	-1.19444	7.1366e-09	Down	0.280779	0.212837	unchanged	-0.200773	0.679678	unchanged	-0.0561602	0.9044	unchanged	-0.573817	0.0411907	unchanged	0.0650475	1	unchanged	0.0559762	0.897676	unchanged	0.0144809	0.975506	unchanged
ENSMUSG00000001288	chr15	102234937	102257517	-	Rarg	retinoic acid receptor, gamma [Source:MGI Symbol;Acc:MGI:97858]	protein_coding	5.23804	-2.67711	8.12317e-08	Down	-2.38152	9.80146e-07	Down	0.352122	0.716497	unchanged	0.0439232	0.982808	unchanged	1.75624	0.0994305	unchanged	0.0273276	1	unchanged	-0.465078	0.709522	unchanged	0.486501	0.65071	unchanged
ENSMUSG00000001289	chr15	102326115	102331873	+	Pfdn5	prefoldin 5 [Source:MGI Symbol;Acc:MGI:1928753]	protein_coding	89.2477	-0.327593	0.0380223	unchanged	-0.86601	2.78552e-09	unchanged	-0.101426	0.841781	unchanged	0.178198	0.396267	unchanged	-0.0178718	0.955275	unchanged	-0.0660542	1	unchanged	0.0575068	0.860252	unchanged	0.29015	0.161834	unchanged
ENSMUSG00000001300	chr8	8617433	8661242	-	Efnb2	ephrin B2 [Source:MGI Symbol;Acc:MGI:105097]	protein_coding	43.0286	-0.129861	0.777147	unchanged	-1.66046	4.03455e-07	Down	0.539322	0.422449	unchanged	1.43521	2.45108e-05	Up	2.79463	3.12e-18	Up	0.358199	1	unchanged	2.12885	2.13359e-09	Up	1.59447	6.54349e-06	Up
ENSMUSG00000001305	chr1	186720977	186749358	-	Rrp15	ribosomal RNA processing 15 homolog (S. cerevisiae) [Source:MGI Symbol;Acc:MGI:1914473]	protein_coding	79.2531	-0.859331	7.59092e-09	unchanged	-1.20156	1.84723e-16	Down	-0.0478379	0.938889	unchanged	0.0104846	0.984663	unchanged	-0.241312	0.272729	unchanged	-0.126026	1	unchanged	-0.159596	0.580124	unchanged	-0.139586	0.623998	unchanged
ENSMUSG00000001313	chr11	101464998	101471853	+	Rnd2	Rho family GTPase 2 [Source:MGI Symbol;Acc:MGI:1338755]	protein_coding	34.1841	-0.251453	0.399456	unchanged	0.867721	0.000654981	unchanged	0.249397	0.706435	unchanged	-0.36799	0.290166	unchanged	0.209703	0.600947	unchanged	-0.0882071	1	unchanged	0.782375	0.00784436	unchanged	0.758167	0.00791687	unchanged
ENSMUSG00000001323	chr11	74906358	74925948	-	Srr	serine racemase [Source:MGI Symbol;Acc:MGI:1351636]	protein_coding	9.90709	0.865784	0.0240712	unchanged	0.0333007	0.951876	unchanged	0.558966	0.494858	unchanged	0.483856	0.268273	unchanged	0.840186	0.0730791	unchanged	0.265104	1	unchanged	0.254008	0.70054	unchanged	0.65177	0.257549	unchanged
ENSMUSG00000001333	chr4	129287616	129308559	+	Sync	syncoilin [Source:MGI Symbol;Acc:MGI:1916078]	protein_coding	1.27395	-1.43527	0.0919993	unchanged	-3.48619	0.000105122	Down	0.436376	NA	unchanged	0.856758	0.478664	unchanged	0.29784	0.879275	unchanged	-0.385276	1	unchanged	-0.981967	NA	unchanged	0.926709	0.630707	unchanged
ENSMUSG00000001334	chr4	129136998	129144593	+	Fndc5	fibronectin type III domain containing 5 [Source:MGI Symbol;Acc:MGI:1917614]	protein_coding	0.772371	0.0871085	0.969797	unchanged	2.63311	0.0616808	unchanged	1.12281	NA	unchanged	-0.301999	0.914349	unchanged	-1.14984	0.573569	unchanged	-0.316994	1	unchanged	0.16251	NA	unchanged	0.0996826	NA	unchanged
ENSMUSG00000001348	chr9	22126726	22135711	-	Acp5	acid phosphatase 5, tartrate resistant [Source:MGI Symbol;Acc:MGI:87883]	protein_coding	30.8525	-0.755857	0.00136385	unchanged	-0.688792	0.00310954	unchanged	0.411767	0.311718	unchanged	0.221101	0.541347	unchanged	0.965464	0.000399086	unchanged	0.253689	1	unchanged	0.286872	0.464823	unchanged	0.491909	0.0951351	unchanged
ENSMUSG00000001366	chr9	78081498	78109065	-	Fbxo9	f-box protein 9 [Source:MGI Symbol;Acc:MGI:1918788]	protein_coding	25.6465	-0.879741	4.56199e-06	unchanged	-0.37135	0.0636748	unchanged	0.0697164	0.922066	unchanged	0.746593	0.000526154	unchanged	0.151867	0.606689	unchanged	-0.217622	1	unchanged	-0.204002	0.570363	unchanged	-0.0880832	0.821583	unchanged
ENSMUSG00000001376	chr6	3498381	3603531	+	Vps50	VPS50 EARP/GARPII complex subunit [Source:MGI Symbol;Acc:MGI:1920538]	protein_coding	21.3182	0.151978	0.576524	unchanged	-0.134464	0.587924	unchanged	-0.0656841	0.943145	unchanged	-0.445796	0.11114	unchanged	-0.229846	0.471014	unchanged	0.196843	1	unchanged	-0.159226	0.691407	unchanged	-0.479091	0.0967494	unchanged
ENSMUSG00000001380	chr18	36766527	36783205	-	Hars	histidyl-tRNA synthetase [Source:MGI Symbol;Acc:MGI:108087]	protein_coding	54.6402	0.980995	6.1997e-12	unchanged	-0.0196988	0.928306	unchanged	0.178807	0.654144	unchanged	-0.196652	0.283879	unchanged	0.0285312	0.913682	unchanged	0.0405895	1	unchanged	0.263024	0.19394	unchanged	0.124605	0.590155	unchanged
ENSMUSG00000001383	chr18	36793875	36799666	+	Zmat2	zinc finger, matrin type 2 [Source:MGI Symbol;Acc:MGI:1913742]	protein_coding	39.091	0.445118	0.00350203	unchanged	0.0352812	0.884748	unchanged	0.294636	0.287661	unchanged	0.0966463	0.674321	unchanged	0.123671	0.644007	unchanged	0.0485019	1	unchanged	-0.384083	0.116261	unchanged	-0.204688	0.40452	unchanged
ENSMUSG00000001403	chr2	164769897	164778822	+	Ube2c	ubiquitin-conjugating enzyme E2C [Source:MGI Symbol;Acc:MGI:1915862]	protein_coding	738.366	-1.93507	3.4233e-15	Down	-0.811993	0.00165967	unchanged	-0.0488058	0.964504	unchanged	0.604576	0.0459336	unchanged	-0.0443136	0.916459	unchanged	-0.178168	1	unchanged	-0.398092	0.310176	unchanged	-0.218141	0.603718	unchanged
ENSMUSG00000001415	chr3	88336259	88362338	+	Smg5	Smg-5 homolog, nonsense mediated mRNA decay factor (C. elegans) [Source:MGI Symbol;Acc:MGI:2447364]	protein_coding	127.029	0.229562	0.214727	unchanged	1.47027	2.10393e-21	Up	0.260293	0.454905	unchanged	-0.326378	0.108167	unchanged	-0.547583	0.00164261	unchanged	-0.26553	1	unchanged	-0.28299	0.221707	unchanged	-0.285294	0.173727	unchanged
ENSMUSG00000001416	chr3	88297115	88321767	+	Cct3	chaperonin containing Tcp1, subunit 3 (gamma) [Source:MGI Symbol;Acc:MGI:104708]	protein_coding	471.747	0.163668	0.114231	unchanged	-0.264817	0.00575424	unchanged	0.110064	0.648533	unchanged	0.210423	0.0611817	unchanged	-0.132266	0.286109	unchanged	0.114686	1	unchanged	-0.0569914	0.759048	unchanged	-0.0311753	0.872365	unchanged
ENSMUSG00000001418	chr3	88325022	88331313	+	Glmp	glycosylated lysosomal membrane protein [Source:MGI Symbol;Acc:MGI:1913318]	protein_coding	180.284	-0.893913	1.64055e-12	unchanged	0.00389748	0.988075	unchanged	-0.451293	0.0109627	unchanged	0.131284	0.507221	unchanged	0.557211	7.79e-05	unchanged	0.313962	1	unchanged	0.18231	0.389294	unchanged	0.0693847	0.773168	unchanged
ENSMUSG00000001419	chr3	88142371	88172086	+	Mef2d	myocyte enhancer factor 2D [Source:MGI Symbol;Acc:MGI:99533]	protein_coding	35.9254	-1.38498	4.71462e-13	Down	-0.922772	7.72836e-07	unchanged	0.33366	0.299837	unchanged	0.94737	1.10341e-05	unchanged	1.02547	3.08e-06	Up	-0.214846	1	unchanged	0.417454	0.135457	unchanged	0.676259	0.00648317	unchanged
ENSMUSG00000001420	chr3	88328654	88336148	-	Tmem79	transmembrane protein 79 [Source:MGI Symbol;Acc:MGI:1919163]	protein_coding	7.46705	-1.05046	0.0248708	Down	-1.62497	0.00112096	Down	0.825227	0.242359	unchanged	0.579827	0.357683	unchanged	2.36305	2.41e-05	Up	-0.0706816	1	unchanged	0.733235	0.384011	unchanged	0.339141	0.709249	unchanged
ENSMUSG00000001424	chr6	28475138	28935162	+	Snd1	staphylococcal nuclease and tudor domain containing 1 [Source:MGI Symbol;Acc:MGI:1929266]	protein_coding	18.13	2.18859	5.74102e-11	Up	2.68138	3.85045e-15	Up	0.0846875	0.960368	unchanged	-0.181568	0.706734	unchanged	0.259343	0.530976	unchanged	-0.384562	1	unchanged	-0.116184	0.844964	unchanged	0.255585	0.604316	unchanged
ENSMUSG00000001435	chr10	77052177	77166548	-	Col18a1	collagen, type XVIII, alpha 1 [Source:MGI Symbol;Acc:MGI:88451]	protein_coding	34.7962	-0.69136	0.454094	unchanged	1.89097	0.0268149	Up	-1.00423	0.609065	unchanged	-1.10861	0.432933	unchanged	1.96672	0.0665902	unchanged	0.891922	1	unchanged	0.104163	0.938794	unchanged	0.353616	0.799697	unchanged
ENSMUSG00000001436	chr10	77032240	77061002	+	Slc19a1	solute carrier family 19 (folate transporter), member 1 [Source:MGI Symbol;Acc:MGI:103182]	protein_coding	18.8545	0.316466	0.393738	unchanged	2.10295	9.51117e-14	Up	-0.962787	0.0842156	unchanged	-1.5733	8.61702e-05	Down	-0.772288	0.035092	unchanged	0.57701	1	unchanged	0.187385	0.695783	unchanged	-0.328276	0.395827	unchanged
ENSMUSG00000001440	chr11	97159713	97187881	-	Kpnb1	karyopherin (importin) beta 1 [Source:MGI Symbol;Acc:MGI:107532]	protein_coding	270.666	0.753988	6.16558e-16	unchanged	-0.394299	2.49906e-05	unchanged	-0.09731	0.730269	unchanged	-0.529688	1.10463e-07	unchanged	-0.38585	0.00030717	unchanged	-0.0983486	1	unchanged	-0.107028	0.515301	unchanged	-0.251891	0.0355142	unchanged
ENSMUSG00000001441	chr11	97205841	97280638	-	Npepps	aminopeptidase puromycin sensitive [Source:MGI Symbol;Acc:MGI:1101358]	protein_coding	67.6531	1.61202	1.76124e-28	Up	0.414931	0.00632597	unchanged	0.0965411	0.87779	unchanged	-0.644113	1.25561e-05	unchanged	-0.443916	0.00445503	unchanged	-0.00282753	1	unchanged	-0.0794151	0.787794	unchanged	-0.311063	0.09046	unchanged
ENSMUSG00000001445	chr11	97041559	97049213	+	Mrpl10	mitochondrial ribosomal protein L10 [Source:MGI Symbol;Acc:MGI:1333801]	protein_coding	56.7169	-0.0371868	0.867437	unchanged	0.14744	0.387624	unchanged	-0.097444	0.864357	unchanged	0.513807	0.00186544	unchanged	0.19875	0.288794	unchanged	-0.0949104	1	unchanged	-0.284211	0.195701	unchanged	-0.0306407	0.928039	unchanged
ENSMUSG00000001467	chr5	4081144	4104746	-	Cyp51	cytochrome P450, family 51 [Source:MGI Symbol;Acc:MGI:106040]	protein_coding	12.645	-2.00918	0.000305908	Down	-0.136662	0.82976	unchanged	-0.496274	0.691543	unchanged	-0.478666	0.660138	unchanged	-0.79846	0.277348	unchanged	-0.322358	1	unchanged	-1.19227	0.0929388	unchanged	-1.21774	0.027301	Down
ENSMUSG00000001472	chr8	123373752	123403835	+	Tcf25	transcription factor 25 (basic helix-loop-helix) [Source:MGI Symbol;Acc:MGI:1914105]	protein_coding	86.7252	-0.155155	0.300837	unchanged	0.251787	0.0459572	unchanged	0.218079	0.382965	unchanged	0.38646	0.00779685	unchanged	0.381623	0.00892659	unchanged	-0.136307	1	unchanged	-0.0978964	0.660013	unchanged	-0.241788	0.136364	unchanged
ENSMUSG00000001473	chr18	67390716	67402749	+	Tubb6	tubulin, beta 6 class V [Source:MGI Symbol;Acc:MGI:1915201]	protein_coding	20.4842	-1.10561	0.0704151	unchanged	-0.150796	0.8454	unchanged	0.388319	0.829653	unchanged	-0.693931	0.420928	unchanged	-0.302265	0.740348	unchanged	0.449053	1	unchanged	-0.958455	0.263808	unchanged	-0.94845	0.273868	unchanged
ENSMUSG00000001482	chr8	123423526	123463270	+	Def8	differentially expressed in FDCP 8 [Source:MGI Symbol;Acc:MGI:1346331]	protein_coding	46.7258	-2.07466	5.99568e-24	Down	-1.76186	2.71628e-17	Down	0.201055	0.701529	unchanged	0.734689	0.00351823	unchanged	0.316551	0.304069	unchanged	-0.314103	1	unchanged	-1.62797	2.40193e-07	Down	-1.62917	5.20722e-08	Down
ENSMUSG00000001494	chr11	101962457	101967015	-	Sost	sclerostin [Source:MGI Symbol;Acc:MGI:1921749]	protein_coding	0.0840883	0	NA	unchanged	0	NA	unchanged	0	NA	unchanged	0	NA	unchanged	0.297831	NA	unchanged	0	1	unchanged	0	NA	unchanged	-0.149936	NA	unchanged
ENSMUSG00000001497	chr12	56691766	56712822	+	Pax9	paired box 9 [Source:MGI Symbol;Acc:MGI:97493]	protein_coding	0.476271	-2.56475	0.0651941	unchanged	-0.930412	0.562641	unchanged	0.0176373	NA	unchanged	0.419348	NA	unchanged	-1.14485	NA	unchanged	-1.14542	1	unchanged	-0.98979	NA	unchanged	0.210733	NA	unchanged
ENSMUSG00000001504	chr13	72628819	72634198	+	Irx2	Iroquois homeobox 2 [Source:MGI Symbol;Acc:MGI:1197526]	protein_coding	1.99579	0.37618	0.715934	unchanged	-0.0653079	0.9464	unchanged	-1.52496	0.489059	unchanged	-2.48193	0.0284151	Down	-2.09674	0.0606549	unchanged	-0.429007	1	unchanged	-2.00027	0.114049	unchanged	-0.400027	0.724648	unchanged
ENSMUSG00000001506	chr11	94936223	94953042	+	Col1a1	collagen, type I, alpha 1 [Source:MGI Symbol;Acc:MGI:88467]	protein_coding	0.877522	1.47135	0.429681	unchanged	1.30274	0.492638	unchanged	0.00522893	NA	unchanged	-1.32556	0.573088	unchanged	1.06209	0.629887	unchanged	1.11284	1	unchanged	-0.987832	NA	unchanged	-2.84346	0.126233	unchanged
ENSMUSG00000001507	chr11	95044473	95076801	-	Itga3	integrin alpha 3 [Source:MGI Symbol;Acc:MGI:96602]	protein_coding	10.3084	-0.782049	0.0922676	unchanged	0.240946	0.625819	unchanged	-0.300166	0.822342	unchanged	-1.83134	0.00542454	Down	-2.06104	0.00261142	Down	-0.0983784	1	unchanged	0.792138	0.136579	unchanged	1.18207	0.00646505	Up
ENSMUSG00000001510	chr11	95120118	95125296	+	Dlx3	distal-less homeobox 3 [Source:MGI Symbol;Acc:MGI:94903]	protein_coding	0.79702	-3.36598	0.0409864	Down	-3.37486	0.0375565	Down	0.248666	NA	unchanged	0	1	unchanged	0.658513	0.806814	unchanged	-1.58789	1	unchanged	0	NA	unchanged	-0.14994	0.965731	unchanged
ENSMUSG00000001517	chr6	128362966	128376146	+	Foxm1	forkhead box M1 [Source:MGI Symbol;Acc:MGI:1347487]	protein_coding	19.399	0.592068	0.0279097	unchanged	0.618761	0.00859628	unchanged	0.154397	0.874651	unchanged	-0.457578	0.153359	unchanged	-0.559405	0.0562877	unchanged	-0.0879828	1	unchanged	-0.204154	0.616548	unchanged	-0.292071	0.385777	unchanged
ENSMUSG00000001518	chr6	128409443	128424931	-	Itfg2	integrin alpha FG-GAP repeat containing 2 [Source:MGI Symbol;Acc:MGI:1915450]	protein_coding	30.542	0.560292	0.014135	unchanged	1.15551	3.46642e-08	Up	0.13301	0.873906	unchanged	-0.196388	0.541239	unchanged	-1.02544	7.23e-07	Down	0.349462	1	unchanged	-0.0104546	0.982622	unchanged	-0.332448	0.205135	unchanged
ENSMUSG00000001521	chr6	128321160	128355851	-	Tulp3	tubby-like protein 3 [Source:MGI Symbol;Acc:MGI:1329045]	protein_coding	11.3942	0.759624	0.107262	unchanged	2.47841	2.00417e-12	Up	-0.110509	0.957413	unchanged	-0.610217	0.286927	unchanged	-2.51544	2.62e-07	Down	0.094286	1	unchanged	-0.498151	0.228554	unchanged	-1.12965	0.000708024	Down
ENSMUSG00000001524	chr17	35667729	35673739	-	Gtf2h4	general transcription factor II H, polypeptide 4 [Source:MGI Symbol;Acc:MGI:1338799]	protein_coding	41.6173	-0.328112	0.1025	unchanged	0.00510862	0.987935	unchanged	0.735586	0.00047424	unchanged	0.451252	0.0369243	unchanged	0.313017	0.181864	unchanged	-0.0860976	1	unchanged	-0.550595	0.0192485	unchanged	-0.0484934	0.908537	unchanged
ENSMUSG00000001525	chr17	35833920	35838306	-	Tubb5	tubulin, beta 5 class I [Source:MGI Symbol;Acc:MGI:107812]	protein_coding	519.879	2.78501	9.85664e-28	Up	2.48565	2.92266e-23	Up	-0.578216	0.252723	unchanged	-1.49811	3.15484e-08	Down	-0.72818	0.010516	unchanged	-0.036652	1	unchanged	-0.263529	0.558518	unchanged	-0.159227	0.729808	unchanged
ENSMUSG00000001542	chr13	75706756	75772364	+	Ell2	elongation factor RNA polymerase II 2 [Source:MGI Symbol;Acc:MGI:2183438]	protein_coding	46.8631	-1.83016	1.9889e-14	Down	-1.29549	3.34658e-08	Down	-0.0121039	1	unchanged	0.305016	0.405376	unchanged	-0.289103	0.461937	unchanged	-0.399266	1	unchanged	0.211205	0.64492	unchanged	-0.351335	0.357915	unchanged
ENSMUSG00000001552	chr11	100368957	100397763	-	Jup	junction plakoglobin [Source:MGI Symbol;Acc:MGI:96650]	protein_coding	53.2133	0.865248	0.000676185	unchanged	-0.0174583	0.964115	unchanged	-0.189607	0.829644	unchanged	-0.551626	0.0636711	unchanged	-0.211392	0.490406	unchanged	0.294856	1	unchanged	-0.01633	0.978254	unchanged	-0.277828	0.445695	unchanged
ENSMUSG00000001555	chr11	100415696	100424824	+	Fkbp10	FK506 binding protein 10 [Source:MGI Symbol;Acc:MGI:104769]	protein_coding	1.28714	-4.07254	0.000411805	Down	-2.40516	0.063633	unchanged	0.578638	NA	unchanged	0	1	unchanged	0	1	unchanged	-0.0575776	1	unchanged	0	NA	unchanged	-0.14994	0.958805	unchanged
ENSMUSG00000001558	chr11	100441916	100457022	+	Klhl10	kelch-like 10 [Source:MGI Symbol;Acc:MGI:2181067]	protein_coding	7.0232	-1.66951	0.000173205	Down	-1.56269	0.000714199	Down	-0.209557	0.889526	unchanged	-0.501602	0.501115	unchanged	1.1269	0.378681	unchanged	0.325154	1	unchanged	0.058864	0.962635	unchanged	-0.386103	0.738546	unchanged
ENSMUSG00000001569	chr5	29434663	29457843	+	Nom1	nucleolar protein with MIF4G domain 1 [Source:MGI Symbol;Acc:MGI:1861749]	protein_coding	16.7801	0.183512	0.485844	unchanged	-0.906291	2.70751e-05	unchanged	-0.126784	0.876096	unchanged	0.176664	0.581189	unchanged	0.253197	0.548241	unchanged	0.123596	1	unchanged	0.00200783	0.99864	unchanged	0.246918	0.551932	unchanged
ENSMUSG00000001576	chr17	26561488	26656934	+	Ergic1	endoplasmic reticulum-golgi intermediate compartment (ERGIC) 1 [Source:MGI Symbol;Acc:MGI:1914708]	protein_coding	13.4069	-0.520952	0.214562	unchanged	1.05443	0.00274822	Up	0.0626835	0.96753	unchanged	0.0573273	0.945864	unchanged	-0.625635	0.117182	unchanged	0.146651	1	unchanged	0.181214	0.773784	unchanged	-0.520633	0.251366	unchanged
ENSMUSG00000001583	chr11	69851004	69858730	-	Tnk1	tyrosine kinase, non-receptor, 1 [Source:MGI Symbol;Acc:MGI:1930958]	protein_coding	4.19898	-0.751845	0.390237	unchanged	1.89947	0.00780706	Up	-0.180561	0.949926	unchanged	1.64442	0.0459373	Up	-1.35922	0.0647238	unchanged	0.202118	1	unchanged	-1.58224	0.0945767	unchanged	-1.22636	0.0943811	unchanged
ENSMUSG00000001588	chr11	69881566	69895539	-	Acap1	ArfGAP with coiled-coil, ankyrin repeat and PH domains 1 [Source:MGI Symbol;Acc:MGI:2388270]	protein_coding	0.502338	-0.273565	0.899827	unchanged	0.908982	0.615073	unchanged	0.365902	NA	unchanged	-0.301999	NA	unchanged	-0.0628333	NA	unchanged	1.06978	1	unchanged	-0.233402	NA	unchanged	-0.14994	NA	unchanged
ENSMUSG00000001604	chr4	136247728	136274898	+	Tcea3	transcription elongation factor A (SII), 3 [Source:MGI Symbol;Acc:MGI:1196908]	protein_coding	13.8442	-0.949136	0.0167563	unchanged	-2.08122	3.26204e-07	Down	0.696413	0.260073	unchanged	1.2488	0.002767	Up	2.59789	0.000179878	Up	0.288046	1	unchanged	-1.04361	0.209503	unchanged	1.11825	0.255425	unchanged
ENSMUSG00000001627	chr12	40201566	40248504	-	Ifrd1	interferon-related developmental regulator 1 [Source:MGI Symbol;Acc:MGI:1316717]	protein_coding	87.5728	-0.683454	4.45275e-05	unchanged	-1.70343	5.59791e-26	Down	-0.242958	0.510778	unchanged	-0.34111	0.115527	unchanged	-0.304141	0.198465	unchanged	-0.19561	1	unchanged	0.0060966	0.990126	unchanged	0.0223987	0.958105	unchanged
ENSMUSG00000001630	chr6	146724994	146778812	+	Stk38l	serine/threonine kinase 38 like [Source:MGI Symbol;Acc:MGI:1922250]	protein_coding	39.2695	1.02181	5.25372e-07	Up	0.641359	0.00173646	unchanged	-0.00614373	1	unchanged	-0.679036	0.00262672	unchanged	-1.29379	1.35e-08	Down	-0.0510112	1	unchanged	-0.236359	0.479462	unchanged	-0.36547	0.1712	unchanged
ENSMUSG00000001632	chr6	113307136	113324860	+	Brpf1	bromodomain and PHD finger containing, 1 [Source:MGI Symbol;Acc:MGI:1926033]	protein_coding	45.9847	0.512989	0.00242303	unchanged	0.846511	1.77078e-07	unchanged	0.321242	0.30603	unchanged	-0.698106	0.000143065	unchanged	-0.346518	0.0883531	unchanged	-0.088584	1	unchanged	0.0331855	0.927022	unchanged	-0.114369	0.692703	unchanged
ENSMUSG00000001642	chr6	34302433	34317478	-	Akr1b3	aldo-keto reductase family 1, member B3 (aldose reductase) [Source:MGI Symbol;Acc:MGI:1353494]	protein_coding	0.956835	-1.24377	0.294289	unchanged	2.26458	0.0367423	Up	-2.04599	NA	unchanged	-0.661669	0.742806	unchanged	0.927015	0.406182	unchanged	0.0436796	1	unchanged	0.748742	NA	unchanged	0.929825	0.46704	unchanged
ENSMUSG00000001655	chr15	102921102	102928814	+	Hoxc13	homeobox C13 [Source:MGI Symbol;Acc:MGI:99560]	protein_coding	2.72237	2.73963	0.00796736	Up	3.87266	0.000110543	Up	-0.348065	0.947086	unchanged	1.44768	0.0634725	unchanged	-0.211753	0.852732	unchanged	0.404353	1	unchanged	-0.314933	0.831238	unchanged	-1.10929	0.256278	unchanged
ENSMUSG00000001663	chr10	75783812	75798584	-	Gstt1	glutathione S-transferase, theta 1 [Source:MGI Symbol;Acc:MGI:107379]	protein_coding	0.535162	0	1	unchanged	0.936197	0.813997	unchanged	0	NA	unchanged	0	NA	unchanged	0	NA	unchanged	0	1	unchanged	1.04	NA	unchanged	0.571405	NA	unchanged
ENSMUSG00000001665	chr10	75774114	75781414	-	Gstt3	glutathione S-transferase, theta 3 [Source:MGI Symbol;Acc:MGI:2143526]	protein_coding	0.61369	0	1	unchanged	3.12024	0.0203782	Up	0	NA	unchanged	0	NA	unchanged	-0.423507	0.858976	unchanged	0	1	unchanged	-1.37402	NA	unchanged	-0.38942	NA	unchanged
ENSMUSG00000001666	chr10	75771229	75773414	-	Ddt	D-dopachrome tautomerase [Source:MGI Symbol;Acc:MGI:1298381]	protein_coding	86.3448	1.04963	1.68334e-06	Up	1.56859	2.06988e-14	Up	-0.36368	0.494437	unchanged	-0.18863	0.555233	unchanged	-0.222368	0.373529	unchanged	-0.261385	1	unchanged	0.400961	0.153026	unchanged	0.162939	0.606599	unchanged
ENSMUSG00000001670	chr8	109990436	109999803	+	Tat	tyrosine aminotransferase [Source:MGI Symbol;Acc:MGI:98487]	protein_coding	112.98	3.00392	8.29881e-11	Up	3.74344	3.25251e-16	Up	-0.504239	0.7037	unchanged	-2.20242	9.89306e-06	Down	-1.21559	0.0211286	Down	0.940354	1	unchanged	0.0288799	0.978566	unchanged	1.33719	0.0184469	Up
ENSMUSG00000001672	chr8	109947913	109962203	-	Marveld3	MARVEL (membrane-associating) domain containing 3 [Source:MGI Symbol;Acc:MGI:1920858]	protein_coding	3.72633	0.919046	0.157524	unchanged	0.0180333	0.987779	unchanged	-1.12507	0.447557	unchanged	-0.520397	0.546019	unchanged	0.364961	0.7203	unchanged	-0.147772	1	unchanged	0.621278	0.53437	unchanged	-0.377218	0.783726	unchanged
ENSMUSG00000001674	chr1	121553834	121567989	-	Ddx18	DEAD (Asp-Glu-Ala-Asp) box polypeptide 18 [Source:MGI Symbol;Acc:MGI:1914192]	protein_coding	158.89	0.438579	0.000830968	unchanged	-0.866182	9.93917e-13	unchanged	0.0626149	0.902098	unchanged	0.0159069	0.958018	unchanged	-0.234136	0.183092	unchanged	0.0220297	1	unchanged	-0.413095	0.0133611	unchanged	-0.0761915	0.753031	unchanged
ENSMUSG00000001687	chr5	148504634	148552789	-	Ubl3	ubiquitin-like 3 [Source:MGI Symbol;Acc:MGI:1344373]	protein_coding	90.8223	-0.791198	1.03699e-07	unchanged	0.214984	0.193047	unchanged	0.249845	0.384786	unchanged	0.630405	0.000131701	unchanged	0.333641	0.0558885	unchanged	0.131288	1	unchanged	0.0960948	0.738355	unchanged	0.0342673	0.92155	unchanged
ENSMUSG00000001700	chr18	56400336	56503792	+	Gramd3	GRAM domain containing 3 [Source:MGI Symbol;Acc:MGI:1914815]	protein_coding	1.84156	1.92227	0.0930765	unchanged	1.62626	0.215	unchanged	-1.07679	0.76786	unchanged	-1.41707	0.310846	unchanged	1.83654	0.0694098	unchanged	-0.316994	1	unchanged	-0.950682	0.660013	unchanged	0.704129	0.703188	unchanged
ENSMUSG00000001707	chr13	38644206	38659058	-	Eef1e1	eukaryotic translation elongation factor 1 epsilon 1 [Source:MGI Symbol;Acc:MGI:1913393]	protein_coding	166.285	-1.20585	5.65382e-18	Down	-1.06167	1.51584e-14	Down	-0.175294	0.614375	unchanged	0.514062	0.00165394	unchanged	0.0560225	0.825618	unchanged	0.033235	1	unchanged	-0.164188	0.518068	unchanged	-0.205655	0.358587	unchanged
ENSMUSG00000001729	chr12	112653820	112674884	-	Akt1	thymoma viral proto-oncogene 1 [Source:MGI Symbol;Acc:MGI:87986]	protein_coding	76.3154	-1.75033	4.49343e-17	Down	-0.99748	1.03224e-06	unchanged	0.159588	0.8051	unchanged	0.0868129	0.840109	unchanged	1.08635	6.98e-07	Up	0.0257096	1	unchanged	0.00931708	0.986086	unchanged	-0.326128	0.284334	unchanged
ENSMUSG00000001750	chr19	3896049	3907133	-	Tcirg1	T cell, immune regulator 1, ATPase, H+ transporting, lysosomal V0 protein A3 [Source:MGI Symbol;Acc:MGI:1350931]	protein_coding	3.43369	-1.9006	0.00141367	Down	-1.18164	0.0344833	Down	0.510866	0.617996	unchanged	-0.526387	0.67277	unchanged	-1.13256	0.452262	unchanged	-0.396231	1	unchanged	0.175993	0.892758	unchanged	-1.95718	0.0377568	Down
ENSMUSG00000001751	chr11	101070011	101077672	+	Naglu	alpha-N-acetylglucosaminidase (Sanfilippo disease IIIB) [Source:MGI Symbol;Acc:MGI:1351641]	protein_coding	1.29812	3.75486	0.00022974	Up	1.55035	0.212494	unchanged	-0.355445	NA	unchanged	0.116617	0.936028	unchanged	1.01605	0.334662	unchanged	0.765135	1	unchanged	0.302151	NA	unchanged	-0.223554	0.92149	unchanged
ENSMUSG00000001755	chr11	101082564	101086619	+	Coasy	Coenzyme A synthase [Source:MGI Symbol;Acc:MGI:1918993]	protein_coding	28.2283	0.973236	7.79841e-06	unchanged	0.266474	0.258183	unchanged	-0.0468442	0.962876	unchanged	0.646925	0.00321896	unchanged	1.29239	7.95e-08	Up	-0.021868	1	unchanged	-0.193327	0.611375	unchanged	0.0993416	0.818022	unchanged
ENSMUSG00000001761	chr6	29735502	29761365	+	Smo	smoothened, frizzled class receptor [Source:MGI Symbol;Acc:MGI:108075]	protein_coding	3.98282	0.41554	0.783535	unchanged	0.966896	0.390685	unchanged	-0.47826	0.92183	unchanged	-1.44325	0.385447	unchanged	-1.30825	0.28488	unchanged	-0.533275	1	unchanged	-0.0818338	0.972015	unchanged	-0.431454	0.787086	unchanged
ENSMUSG00000001763	chr6	29694221	29718559	+	Tspan33	tetraspanin 33 [Source:MGI Symbol;Acc:MGI:1919012]	protein_coding	1.4734	-0.99841	0.497611	unchanged	-0.457508	0.765531	unchanged	0.00865639	NA	unchanged	2.31366	0.0668015	unchanged	3.29545	0.000295495	Up	-0.27701	1	unchanged	-0.981967	0.658543	unchanged	0.110954	0.95388	unchanged
ENSMUSG00000001767	chr2	145917478	145935014	-	Crnkl1	crooked neck pre-mRNA splicing factor 1 [Source:MGI Symbol;Acc:MGI:1914127]	protein_coding	44.9812	-1.10058	1.71706e-06	Down	-2.81791	1.57933e-34	Down	-0.164539	0.822934	unchanged	-0.29639	0.387984	unchanged	-0.162937	0.708571	unchanged	0.164207	1	unchanged	-0.501989	0.227137	unchanged	-0.0623844	0.922423	unchanged
ENSMUSG00000001768	chr2	145675214	145887616	+	Rin2	Ras and Rab interactor 2 [Source:MGI Symbol;Acc:MGI:1921280]	protein_coding	5.30681	1.49951	0.000920341	Up	-1.1861	0.0164747	Down	0.311159	0.859943	unchanged	0.350397	0.548546	unchanged	0.80905	0.200375	unchanged	-0.0133184	1	unchanged	0.339602	0.734184	unchanged	1.08225	0.142801	unchanged
ENSMUSG00000001774	chr9	18292124	18317442	+	Chordc1	cysteine and histidine-rich domain (CHORD)-containing, zinc-binding protein 1 [Source:MGI Symbol;Acc:MGI:1914167]	protein_coding	53.0727	-0.874337	6.78351e-08	unchanged	-1.17344	7.85875e-17	Down	0.108789	0.828039	unchanged	0.194294	0.436598	unchanged	-0.876642	2.48e-06	unchanged	0.0788551	1	unchanged	-0.389359	0.0826802	unchanged	-0.534438	0.00762888	unchanged
ENSMUSG00000001783	chr10	85938636	85957823	-	Rtcb	RNA 2',3'-cyclic phosphate and 5'-OH ligase [Source:MGI Symbol;Acc:MGI:106379]	protein_coding	74.9875	0.766842	1.03919e-09	unchanged	-0.235047	0.0877581	unchanged	0.0427477	0.943145	unchanged	-0.107722	0.563916	unchanged	-0.158243	0.417157	unchanged	-0.0168819	1	unchanged	-0.305494	0.10638	unchanged	-0.106984	0.617212	unchanged
ENSMUSG00000001785	chr10	85829493	85889096	+	Pwp1	PWP1 homolog, endonuclein [Source:MGI Symbol;Acc:MGI:1914735]	protein_coding	121.451	-0.999959	2.17324e-13	unchanged	-1.31262	1.63911e-22	Down	0.0657685	0.899446	unchanged	0.3246	0.0614205	unchanged	0.401276	0.0219205	unchanged	-0.0451403	1	unchanged	-0.154326	0.555788	unchanged	-0.0281086	0.937374	unchanged
ENSMUSG00000001786	chr10	86021971	86051873	+	Fbxo7	F-box protein 7 [Source:MGI Symbol;Acc:MGI:1917004]	protein_coding	4.79464	0.0337562	0.966504	unchanged	-0.500484	0.387847	unchanged	-0.57907	0.676086	unchanged	-0.560564	0.470252	unchanged	-0.703299	0.338744	unchanged	-0.544799	1	unchanged	-0.517919	0.634426	unchanged	-0.315664	0.723793	unchanged
ENSMUSG00000001794	chr7	30186935	30198811	-	Capns1	calpain, small subunit 1 [Source:MGI Symbol;Acc:MGI:88266]	protein_coding	206.772	0.268291	0.154745	unchanged	2.08836	9.75584e-39	Up	0.0592383	0.932978	unchanged	0.485751	0.0104533	unchanged	0.437428	0.0131282	unchanged	0.204226	1	unchanged	0.553635	0.0042444	unchanged	0.368289	0.0683448	unchanged
ENSMUSG00000001802	chr7	35200026	35215498	-	Lrp3	low density lipoprotein receptor-related protein 3 [Source:MGI Symbol;Acc:MGI:3584516]	protein_coding	1.70662	-1.98594	0.0694091	unchanged	-1.32848	0.265681	unchanged	0.469178	0.864515	unchanged	-0.662672	0.746343	unchanged	1.06017	0.25833	unchanged	-0.332808	1	unchanged	0.100054	0.972665	unchanged	-0.0274047	0.990627	unchanged
ENSMUSG00000001819	chr2	74668309	74671599	+	Hoxd13	homeobox D13 [Source:MGI Symbol;Acc:MGI:96205]	protein_coding	0.263055	-0.273565	NA	unchanged	0.214853	NA	unchanged	-0.355444	NA	unchanged	0.419348	NA	unchanged	-1.50674	NA	unchanged	-0.316993	1	unchanged	0.100053	NA	unchanged	-1.34978	NA	unchanged
ENSMUSG00000001827	chr7	101858330	101870788	-	Folr1	folate receptor 1 (adult) [Source:MGI Symbol;Acc:MGI:95568]	protein_coding	185.547	-1.78491	1.74964e-15	Down	-1.576	4.33032e-12	Down	-0.114617	0.897651	unchanged	0.589933	0.0320007	unchanged	1.8009	2.59e-14	Up	0.102477	1	unchanged	0.304739	0.434048	unchanged	0.5359	0.0863355	unchanged
ENSMUSG00000001829	chr7	101663632	101795506	+	Clpb	ClpB caseinolytic peptidase B [Source:MGI Symbol;Acc:MGI:1100517]	protein_coding	18.0154	0.384324	0.128258	unchanged	0.712465	0.00362025	unchanged	0.130028	0.881328	unchanged	0.0138282	0.986543	unchanged	0.431275	0.146633	unchanged	-0.299655	1	unchanged	0.0638985	0.896309	unchanged	-0.311154	0.318423	unchanged
ENSMUSG00000001833	chr9	25252438	25308571	+	2021-09-07	septin 7 [Source:MGI Symbol;Acc:MGI:1335094]	protein_coding	111.341	0.167418	0.401165	unchanged	0.0129766	0.959978	unchanged	-0.0458191	0.949003	unchanged	0.373274	0.0575779	unchanged	0.332802	0.0781039	unchanged	0.0316072	1	unchanged	0.310543	0.181537	unchanged	-0.361315	0.0884173	unchanged
ENSMUSG00000001844	chr5	143316488	143329256	-	Zdhhc4	zinc finger, DHHC domain containing 4 [Source:MGI Symbol;Acc:MGI:1920131]	protein_coding	33.5646	-0.322606	0.184398	unchanged	1.4698	6.44891e-14	Up	-0.281131	0.588476	unchanged	0.187224	0.581189	unchanged	0.0222568	0.952788	unchanged	-0.00526251	1	unchanged	0.163542	0.620049	unchanged	0.0261593	0.953909	unchanged
ENSMUSG00000001847	chr5	143503633	143528036	-	Rac1	Rac family small GTPase 1 [Source:MGI Symbol;Acc:MGI:97845]	protein_coding	300.052	-0.173611	0.0891917	unchanged	-0.254644	0.00583382	unchanged	0.0846115	0.75562	unchanged	0.242332	0.0271194	unchanged	0.378618	9.3e-05	unchanged	0.122038	1	unchanged	0.178683	0.172224	unchanged	0.126504	0.346555	unchanged
ENSMUSG00000001855	chr2	31974435	32053975	+	Nup214	nucleoporin 214 [Source:MGI Symbol;Acc:MGI:1095411]	protein_coding	26.7126	-0.335014	0.107666	unchanged	0.433918	0.0291617	unchanged	-0.229748	0.618914	unchanged	-0.161934	0.606286	unchanged	-0.166091	0.5674	unchanged	-0.13677	1	unchanged	-0.0894362	0.814919	unchanged	-0.137317	0.694325	unchanged
ENSMUSG00000001864	chr2	31950138	31973442	+	Aif1l	allograft inflammatory factor 1-like [Source:MGI Symbol;Acc:MGI:1919598]	protein_coding	2.80705	-2.44987	0.0215153	Down	-0.385618	0.793268	unchanged	1.16933	0.436193	unchanged	0.780022	0.688159	unchanged	2.86356	0.00381576	Up	0.0368052	1	unchanged	-0.97626	0.652759	unchanged	-0.322765	0.826407	unchanged
ENSMUSG00000001870	chr17	75005567	75392512	+	Ltbp1	latent transforming growth factor beta binding protein 1 [Source:MGI Symbol;Acc:MGI:109151]	protein_coding	0.289121	0	NA	unchanged	0.214852	0.969219	unchanged	0	NA	unchanged	0	NA	unchanged	0	NA	unchanged	-0.316992	1	unchanged	-0.260619	NA	unchanged	-0.510612	NA	unchanged
ENSMUSG00000001891	chr11	21321137	21371201	-	Ugp2	UDP-glucose pyrophosphorylase 2 [Source:MGI Symbol;Acc:MGI:2183447]	protein_coding	55.1134	0.23048	0.49806	unchanged	-0.836746	0.0024264	unchanged	0.225815	0.792593	unchanged	0.226526	0.591169	unchanged	1.2207	1.21e-05	Up	0.197063	1	unchanged	0.717225	0.0450175	unchanged	0.118266	0.818022	unchanged
ENSMUSG00000001909	chr8	84686306	84699808	+	Trmt1	tRNA methyltransferase 1 [Source:MGI Symbol;Acc:MGI:1289155]	protein_coding	39.2259	0.730306	0.000598385	unchanged	1.06008	8.32968e-08	Up	0.0536814	0.954713	unchanged	0.0929906	0.790172	unchanged	-0.0576472	0.881679	unchanged	-0.237616	1	unchanged	-0.289282	0.34356	unchanged	0.0640486	0.875915	unchanged
ENSMUSG00000001910	chr8	84670478	84687902	-	Nacc1	nucleus accumbens associated 1, BEN and BTB (POZ) domain containing [Source:MGI Symbol;Acc:MGI:1914080]	protein_coding	36.2925	-0.307742	0.155601	unchanged	1.10041	1.41932e-09	Up	-0.0159384	0.990526	unchanged	-0.25644	0.375686	unchanged	-0.178209	0.487351	unchanged	0.0273249	1	unchanged	0.0373562	0.924872	unchanged	0.0110565	0.977044	unchanged
ENSMUSG00000001911	chr8	84699875	84800344	-	Nfix	nuclear factor I/X [Source:MGI Symbol;Acc:MGI:97311]	protein_coding	1.66949	2.5695	0.00524176	Up	-0.287163	0.7906	unchanged	-0.335397	0.944324	unchanged	-0.575086	0.567687	unchanged	-2.76775	0.0106126	Down	-0.950479	1	unchanged	0.403033	0.80684	unchanged	-0.582678	0.625686	unchanged
ENSMUSG00000001918	chr7	16781339	16798274	+	Slc1a5	solute carrier family 1 (neutral amino acid transporter), member 5 [Source:MGI Symbol;Acc:MGI:105305]	protein_coding	33.5237	0.181478	0.756646	unchanged	2.10144	4.0333e-07	Up	-0.290027	0.851629	unchanged	-0.476773	0.442365	unchanged	-2.36687	4.58e-08	Down	-0.287882	1	unchanged	-1.10076	0.0382275	Down	-1.60931	0.000277821	Down
ENSMUSG00000001924	chrX	20658325	20683179	+	Uba1	ubiquitin-like modifier activating enzyme 1 [Source:MGI Symbol;Acc:MGI:98890]	protein_coding	448.243	1.00061	3.23798e-07	Up	0.541188	0.00826361	unchanged	-0.220535	0.677211	unchanged	-0.466554	0.0476211	unchanged	0.285643	0.250213	unchanged	0.0308892	1	unchanged	-0.0855376	0.831449	unchanged	0.814642	0.000235432	unchanged
ENSMUSG00000001930	chr6	125546773	125686679	+	Vwf	Von Willebrand factor [Source:MGI Symbol;Acc:MGI:98941]	protein_coding	0.721875	0.797749	0.646174	unchanged	0.575527	0.745854	unchanged	0.00522893	NA	unchanged	-1.37331	0.480468	unchanged	0.281704	0.894401	unchanged	-0.316994	1	unchanged	0.100054	NA	unchanged	-0.510614	NA	unchanged
ENSMUSG00000001942	chr9	37555697	37649655	+	Siae	sialic acid acetylesterase [Source:MGI Symbol;Acc:MGI:104803]	protein_coding	7.00653	1.03315	0.009622	Up	1.17599	0.00584003	Up	0.0856094	0.962737	unchanged	0.631807	0.108933	unchanged	0.852218	0.0230828	unchanged	0.278846	1	unchanged	-0.457327	0.483041	unchanged	0.35711	0.555787	unchanged
ENSMUSG00000001943	chr9	37539254	37544205	+	Vsig2	V-set and immunoglobulin domain containing 2 [Source:MGI Symbol;Acc:MGI:1928009]	protein_coding	0.397488	0	1	unchanged	0.214853	0.962374	unchanged	0	NA	unchanged	0	NA	unchanged	-0.423506	NA	unchanged	0.0436795	1	unchanged	0.100053	NA	unchanged	0	NA	unchanged
ENSMUSG00000001946	chr9	37528077	37538319	+	Esam	endothelial cell-specific adhesion molecule [Source:MGI Symbol;Acc:MGI:1916774]	protein_coding	1.19427	-0.271933	0.836955	unchanged	-0.799424	0.415171	unchanged	0.335711	NA	unchanged	-1.83149	0.190866	unchanged	-0.774218	0.657955	unchanged	0.997522	1	unchanged	-0.556363	NA	unchanged	-1.66557	0.256381	unchanged
ENSMUSG00000001948	chr9	37603289	37613722	-	Spa17	sperm autoantigenic protein 17 [Source:MGI Symbol;Acc:MGI:1333778]	protein_coding	2.09103	2.08493	0.00176953	Up	1.14597	0.140461	unchanged	0.819769	0.655406	unchanged	-0.102454	0.910675	unchanged	0.167657	0.868774	unchanged	0.57151	1	unchanged	0.597874	0.545879	unchanged	-0.0189062	0.990627	unchanged
ENSMUSG00000001962	chrX	74313032	74320149	+	Fam50a	family with sequence similarity 50, member A [Source:MGI Symbol;Acc:MGI:1351626]	protein_coding	58.4269	-0.0406623	0.90843	unchanged	-1.14744	1.01598e-06	Down	0.0557227	0.956519	unchanged	0.109972	0.787967	unchanged	0.268142	0.409428	unchanged	0.153785	1	unchanged	-0.140004	0.778566	unchanged	0.612308	0.0487284	unchanged
ENSMUSG00000001964	chrX	74254686	74261548	+	Emd	emerin [Source:MGI Symbol;Acc:MGI:108117]	protein_coding	42.6624	-0.599535	0.00872305	unchanged	1.24811	1.67356e-08	Up	-0.249601	0.649997	unchanged	-0.220656	0.522294	unchanged	0.16294	0.611312	unchanged	-0.130188	1	unchanged	-0.0799436	0.856517	unchanged	0.176962	0.618094	unchanged
ENSMUSG00000001983	chr11	106066060	106073612	+	Taco1	translational activator of mitochondrially encoded cytochrome c oxidase I [Source:MGI Symbol;Acc:MGI:1917457]	protein_coding	4.99994	0.313733	0.498142	unchanged	-1.20952	0.00564644	Down	-0.030139	0.992935	unchanged	0.417253	0.395987	unchanged	0.45471	0.435688	unchanged	-0.320471	1	unchanged	0.269096	0.780758	unchanged	0.128646	0.88819	unchanged
ENSMUSG00000001985	chr4	125490699	125714173	+	Grik3	glutamate receptor, ionotropic, kainate 3 [Source:MGI Symbol;Acc:MGI:95816]	protein_coding	3.32793	0.447782	0.810343	unchanged	1.79478	0.181212	unchanged	0	1	unchanged	-0.301999	0.905529	unchanged	-3.59251	0.00071844	Down	-0.316994	1	unchanged	-0.451478	0.84888	unchanged	-1.19229	0.364901	unchanged
ENSMUSG00000001988	chr7	16455720	16477728	-	Npas1	neuronal PAS domain protein 1 [Source:MGI Symbol;Acc:MGI:109205]	protein_coding	0.505134	-2.29812	0.08975	unchanged	-1.35776	0.3627	unchanged	0.0104735	NA	unchanged	1.43707	NA	unchanged	2.00746	NA	unchanged	-0.814275	1	unchanged	0.100054	NA	unchanged	0.210733	NA	unchanged
ENSMUSG00000001995	chr8	125418062	125569808	-	Sipa1l2	signal-induced proliferation-associated 1 like 2 [Source:MGI Symbol;Acc:MGI:2676970]	protein_coding	6.77391	2.59775	2.55059e-08	Up	0.542584	0.197147	unchanged	0.825356	0.479424	unchanged	-0.0774383	0.903054	unchanged	0.2704	0.653967	unchanged	0.143772	1	unchanged	-0.173229	0.81965	unchanged	0.0744296	0.927677	unchanged
ENSMUSG00000001998	chr2	127008716	127067909	+	Ap4e1	adaptor-related protein complex AP-4, epsilon 1 [Source:MGI Symbol;Acc:MGI:1336993]	protein_coding	3.13985	0.483848	0.384911	unchanged	-1.09681	0.0372563	Down	0.216335	0.911123	unchanged	0.434795	0.478707	unchanged	-0.292712	0.771443	unchanged	0.139618	1	unchanged	0.104461	0.9392	unchanged	0.71796	0.409826	unchanged
ENSMUSG00000001999	chr2	127070664	127097084	+	Blvra	biliverdin reductase A [Source:MGI Symbol;Acc:MGI:88170]	protein_coding	7.95975	0.533043	0.291602	unchanged	1.27057	0.00167292	Up	-0.278228	0.876096	unchanged	0.851361	0.0560578	unchanged	1.08885	0.00336936	Up	-0.0612609	1	unchanged	0.871576	0.0325078	unchanged	0.460881	0.28336	unchanged
ENSMUSG00000002006	chrX	73793358	73824969	-	Pdzd4	PDZ domain containing 4 [Source:MGI Symbol;Acc:MGI:2443483]	protein_coding	1.05839	0.0871085	0.969873	unchanged	-2.76882	0.0509212	unchanged	0.365902	NA	unchanged	0.0586749	0.987997	unchanged	0	1	unchanged	-1.85797	1	unchanged	0.460727	NA	unchanged	-0.14994	0.961696	unchanged
ENSMUSG00000002010	chrX	73778962	73786897	-	Idh3g	isocitrate dehydrogenase 3 (NAD+), gamma [Source:MGI Symbol;Acc:MGI:1099463]	protein_coding	146.024	-0.042469	0.895207	unchanged	0.416066	0.0729824	unchanged	-0.0760982	0.932837	unchanged	-0.242706	0.435	unchanged	-0.049162	0.889023	unchanged	0.18845	1	unchanged	-0.0341887	0.947194	unchanged	0.362694	0.222012	unchanged
ENSMUSG00000002012	chrX	73655993	73660117	-	Pnck	pregnancy upregulated non-ubiquitously expressed CaM kinase [Source:MGI Symbol;Acc:MGI:1347357]	protein_coding	0.813435	0.808456	0.62433	unchanged	0.23739	0.885492	unchanged	0.365902	NA	unchanged	-0.301999	0.90276	unchanged	-1.23979	0.359524	unchanged	-0.526761	1	unchanged	-0.867114	NA	unchanged	-0.160862	0.938407	unchanged
ENSMUSG00000002014	chrX	73787027	73790830	+	Ssr4	signal sequence receptor, delta [Source:MGI Symbol;Acc:MGI:1099464]	protein_coding	222.419	-0.712229	0.0007418	unchanged	0.0672101	0.813264	unchanged	-0.237664	0.65243	unchanged	0.181044	0.569418	unchanged	1.00773	2.06e-06	Up	0.171462	1	unchanged	0.437363	0.130066	unchanged	0.686265	0.0044628	unchanged
ENSMUSG00000002015	chrX	73686177	73716175	-	Bcap31	B cell receptor associated protein 31 [Source:MGI Symbol;Acc:MGI:1350933]	protein_coding	133.668	0.510221	0.0133613	unchanged	-0.874495	7.94511e-06	unchanged	-0.153481	0.813189	unchanged	0.0993703	0.766364	unchanged	0.610054	0.00395018	unchanged	0.066823	1	unchanged	0.00310438	0.996589	unchanged	0.152832	0.647868	unchanged
ENSMUSG00000002017	chr17	75537085	75551946	-	Fam98a	family with sequence similarity 98, member A [Source:MGI Symbol;Acc:MGI:1919972]	protein_coding	39.523	0.405932	0.358917	unchanged	0.206763	0.667899	unchanged	0.248725	0.853268	unchanged	-0.091542	0.900761	unchanged	0.965414	0.0243225	unchanged	-0.122677	1	unchanged	-0.0734406	0.934256	unchanged	0.942785	0.0514534	unchanged
ENSMUSG00000002028	chr9	44803354	44881296	-	Kmt2a	lysine (K)-specific methyltransferase 2A [Source:MGI Symbol;Acc:MGI:96995]	protein_coding	19.0375	2.92143	5.18762e-15	Up	3.50342	7.00214e-17	Up	0.21958	0.905182	unchanged	-0.18214	0.684066	unchanged	-0.320086	0.419318	unchanged	0.241395	1	unchanged	0.336399	0.447776	unchanged	-0.132441	0.803818	unchanged
ENSMUSG00000002031	chr9	44767907	44793447	+	Ift46	intraflagellar transport 46 [Source:MGI Symbol;Acc:MGI:1923818]	protein_coding	44.9408	-0.0982478	0.711652	unchanged	1.24433	3.20396e-11	Up	-0.42898	0.24417	unchanged	-0.288425	0.304263	unchanged	-1.12022	2.87e-08	Down	0.250445	1	unchanged	-0.609628	0.00873551	unchanged	-0.595987	0.00526086	unchanged
ENSMUSG00000002032	chr9	44793768	44799307	-	Tmem25	transmembrane protein 25 [Source:MGI Symbol;Acc:MGI:1918937]	protein_coding	0.575087	0.447782	0.814181	unchanged	0.575527	0.747419	unchanged	0	NA	unchanged	0.419348	NA	unchanged	-1.41314	0.348313	unchanged	0.765027	1	unchanged	-0.26062	NA	unchanged	-1.24202	NA	unchanged
ENSMUSG00000002033	chr9	44969571	44980431	-	Cd3g	CD3 antigen, gamma polypeptide [Source:MGI Symbol;Acc:MGI:88333]	protein_coding	0.927699	3.65668	0.03168	Up	0	1	unchanged	0	NA	unchanged	-2.08618	0.338479	unchanged	1.35073	0.478757	unchanged	0	1	unchanged	1.18207	NA	unchanged	-0.510614	0.889782	unchanged
ENSMUSG00000002043	chr7	19508394	19516145	+	Trappc6a	trafficking protein particle complex 6A [Source:MGI Symbol;Acc:MGI:1914341]	protein_coding	30.2563	0.885687	0.00104374	unchanged	3.75192	1.00256e-34	Up	-0.181544	0.869673	unchanged	-0.0488015	0.917473	unchanged	0.0221331	0.956706	unchanged	0.575236	1	unchanged	-0.0700528	0.870687	unchanged	-0.14331	0.684563	unchanged
ENSMUSG00000002052	chr11	78206745	78245987	-	Supt6	SPT6, histone chaperone and transcription elongation factor [Source:MGI Symbol;Acc:MGI:107726]	protein_coding	53.1728	0.128034	0.48527	unchanged	0.561338	0.00019991	unchanged	-0.16614	0.680653	unchanged	-0.52561	0.00251584	unchanged	-0.255775	0.227394	unchanged	0.0319024	1	unchanged	-0.293925	0.176798	unchanged	-0.294547	0.150883	unchanged
ENSMUSG00000002055	chr11	78301528	78322457	+	Spag5	sperm associated antigen 5 [Source:MGI Symbol;Acc:MGI:1927470]	protein_coding	27.4766	0.444752	0.0394133	unchanged	0.113478	0.678987	unchanged	-0.303677	0.541298	unchanged	0.205769	0.465802	unchanged	-0.706828	0.0103724	unchanged	-0.138666	1	unchanged	-0.471003	0.140744	unchanged	-0.216038	0.559154	unchanged
ENSMUSG00000002058	chr11	78343481	78349164	+	Unc119	unc-119 lipid binding chaperone [Source:MGI Symbol;Acc:MGI:1328357]	protein_coding	18.8296	1.25059	9.64974e-06	Up	1.6499	2.15536e-12	Up	-0.0304707	0.98786	unchanged	-0.0164592	0.983447	unchanged	-0.439686	0.0906381	unchanged	-0.356331	1	unchanged	-0.0810339	0.847598	unchanged	0.32473	0.250057	unchanged
ENSMUSG00000002059	chr11	78188429	78192193	+	Rab34	RAB34, member RAS oncogene family [Source:MGI Symbol;Acc:MGI:104606]	protein_coding	8.6845	-1.34967	0.00379259	Down	0.301336	0.503034	unchanged	-0.748732	0.338282	unchanged	-1.47698	0.0766208	unchanged	-1.93998	0.0989643	unchanged	-0.225216	1	unchanged	0.943471	0.0341446	unchanged	0.99283	0.0535475	unchanged
ENSMUSG00000002064	chr11	78245745	78255496	+	Sdf2	stromal cell derived factor 2 [Source:MGI Symbol;Acc:MGI:108019]	protein_coding	51.8123	-0.240497	0.121272	unchanged	-0.219994	0.13628	unchanged	-0.0919991	0.851629	unchanged	-0.344113	0.058008	unchanged	0.14487	0.495472	unchanged	-0.0443491	1	unchanged	-0.122253	0.640449	unchanged	-0.0568113	0.834934	unchanged
ENSMUSG00000002068	chr7	38097983	38107534	-	Ccne1	cyclin E1 [Source:MGI Symbol;Acc:MGI:88316]	protein_coding	103.85	-3.50971	1.58676e-36	Down	-3.72764	2.17662e-40	Down	0.108803	0.92265	unchanged	0.0796743	0.898151	unchanged	-0.168805	0.745646	unchanged	0.0150521	1	unchanged	0.0689552	0.925148	unchanged	-0.880502	0.0244286	unchanged
ENSMUSG00000002076	chr17	31944768	32036349	-	Hsf2bp	heat shock transcription factor 2 binding protein [Source:MGI Symbol;Acc:MGI:1921627]	protein_coding	15.7457	-0.0262622	0.966504	unchanged	-0.185564	0.710864	unchanged	-0.389124	0.722433	unchanged	-1.93571	0.000139948	Down	-1.71471	7.35e-05	Down	-0.515966	1	unchanged	-1.22395	0.0279438	Down	-1.02646	0.0435425	Down
ENSMUSG00000002083	chr7	16308392	16318205	+	Bbc3	BCL2 binding component 3 [Source:MGI Symbol;Acc:MGI:2181667]	protein_coding	8.512	0.478498	0.405802	unchanged	-0.788029	0.222808	unchanged	0.544785	0.656738	unchanged	-0.513091	0.468111	unchanged	1.2226	0.0303761	Up	0.409562	1	unchanged	0.723117	0.459109	unchanged	0.212081	0.828429	unchanged
ENSMUSG00000002102	chr2	91054008	91066369	+	Psmc3	proteasome (prosome, macropain) 26S subunit, ATPase 3 [Source:MGI Symbol;Acc:MGI:1098754]	protein_coding	165.372	0.645439	8.05565e-07	unchanged	-0.0189307	0.927616	unchanged	0.205636	0.486797	unchanged	0.33312	0.0267898	unchanged	0.355879	0.023392	unchanged	0.0116332	1	unchanged	-0.0146905	0.965173	unchanged	0.0283355	0.926484	unchanged
ENSMUSG00000002103	chr2	91202884	91214098	+	Acp2	acid phosphatase 2, lysosomal [Source:MGI Symbol;Acc:MGI:87882]	protein_coding	9.25507	1.76205	1.6161e-08	Up	0.790427	0.0296897	unchanged	0.579846	0.432188	unchanged	0.390226	0.205132	unchanged	0.211452	0.661862	unchanged	0.140035	1	unchanged	0.656728	0.109517	unchanged	0.451584	0.241398	unchanged
ENSMUSG00000002104	chr2	91035619	91045729	+	Rapsn	receptor-associated protein of the synapse [Source:MGI Symbol;Acc:MGI:99422]	protein_coding	0.964673	0.447782	0.824866	unchanged	0.575527	0.762951	unchanged	0.726576	NA	unchanged	-0.301999	0.911872	unchanged	0.658514	0.76407	unchanged	0.0436796	1	unchanged	-0.26062	NA	unchanged	-0.007657	0.999541	unchanged
ENSMUSG00000002105	chr2	91061790	91070417	-	Slc39a13	solute carrier family 39 (metal ion transporter), member 13 [Source:MGI Symbol;Acc:MGI:1915677]	protein_coding	4.01945	-0.17606	0.814979	unchanged	1.25718	0.0211347	Up	0.529995	0.677695	unchanged	0.587225	0.420644	unchanged	0.922236	0.0502707	unchanged	0.537012	1	unchanged	0.488025	0.49504	unchanged	-0.047474	0.962154	unchanged
ENSMUSG00000002107	chr2	6539693	7509563	-	Celf2	CUGBP, Elav-like family member 2 [Source:MGI Symbol;Acc:MGI:1338822]	protein_coding	16.4816	0.399242	0.368294	unchanged	-0.259503	0.577646	unchanged	0.0504115	0.977215	unchanged	0.658381	0.143297	unchanged	0.0609767	0.915933	unchanged	0.151594	1	unchanged	0.216044	0.777408	unchanged	0.650602	0.221794	unchanged
ENSMUSG00000002108	chr2	91184060	91202834	-	Nr1h3	nuclear receptor subfamily 1, group H, member 3 [Source:MGI Symbol;Acc:MGI:1352462]	protein_coding	2.40879	-2.84163	4.7166e-05	Down	-1.9396	0.0164747	Down	-0.145506	0.945081	unchanged	-1.46966	0.285896	unchanged	0.292546	0.881585	unchanged	0.215407	1	unchanged	1.45696	0.226004	unchanged	2.51537	0.0301697	Up
ENSMUSG00000002109	chr2	91211571	91236982	-	Ddb2	damage specific DNA binding protein 2 [Source:MGI Symbol;Acc:MGI:1355314]	protein_coding	11.0995	-0.459422	0.12713	unchanged	-0.305767	0.350324	unchanged	-0.0903609	0.932687	unchanged	1.11278	6.72835e-05	Up	0.885257	0.00484932	unchanged	0.270731	1	unchanged	-0.206715	0.731789	unchanged	-0.0326594	0.959243	unchanged
ENSMUSG00000002111	chr2	91082389	91115756	+	Spi1	spleen focus forming virus (SFFV) proviral integration oncogene [Source:MGI Symbol;Acc:MGI:98282]	protein_coding	25.3774	-2.3294	1.04501e-12	Down	-2.04398	6.49515e-10	Down	0.346893	0.649997	unchanged	2.48302	1.72175e-13	Up	1.68443	7.44e-07	Up	0.205996	1	unchanged	0.475655	0.419828	unchanged	0.586671	0.277134	unchanged
ENSMUSG00000002129	chr11	4160349	4182541	+	Sf3a1	splicing factor 3a, subunit 1 [Source:MGI Symbol;Acc:MGI:1914715]	protein_coding	85.2038	0.234021	0.0333549	unchanged	-0.147089	0.193553	unchanged	0.0875738	0.782657	unchanged	-0.340279	0.00437899	unchanged	-0.177155	0.233172	unchanged	-0.0332783	1	unchanged	-0.0835238	0.677588	unchanged	-0.16537	0.274292	unchanged
ENSMUSG00000002147	chr10	127642985	127660957	+	Stat6	signal transducer and activator of transcription 6 [Source:MGI Symbol;Acc:MGI:103034]	protein_coding	19.4713	-0.913503	0.0338648	unchanged	-0.3819	0.416255	unchanged	0.00401701	1	unchanged	0.484444	0.402916	unchanged	0.0612159	0.936964	unchanged	0.897415	1	unchanged	-0.248784	0.757698	unchanged	0.251869	0.738605	unchanged
ENSMUSG00000002190	chr8	83389866	83428552	+	Clgn	calmegin [Source:MGI Symbol;Acc:MGI:107472]	protein_coding	0.309374	0.447781	NA	unchanged	0	1	unchanged	0.365902	NA	unchanged	0.0586748	NA	unchanged	-1.14485	NA	unchanged	0.404352	1	unchanged	0.460726	NA	unchanged	-0.14994	NA	unchanged
ENSMUSG00000002204	chr7	44572379	44586862	+	Napsa	napsin A aspartic peptidase [Source:MGI Symbol;Acc:MGI:109365]	protein_coding	2.53909	0.0185261	0.991033	unchanged	-0.84451	0.323716	unchanged	1.09946	0.502584	unchanged	1.59233	0.0695784	unchanged	2.07494	0.0635397	unchanged	-0.509554	1	unchanged	-0.0364148	0.985046	unchanged	1.06005	0.4639	unchanged
ENSMUSG00000002205	chr7	44748412	44777515	+	Vrk3	vaccinia related kinase 3 [Source:MGI Symbol;Acc:MGI:2182465]	protein_coding	22.2892	-0.770925	0.000158434	unchanged	-0.638594	0.000857649	unchanged	-0.0126408	0.995999	unchanged	0.0462796	0.91285	unchanged	0.468417	0.0971593	unchanged	-0.273145	1	unchanged	0.245421	0.466224	unchanged	-0.0104139	0.981117	unchanged
ENSMUSG00000002210	chr7	24399618	24422778	+	Smg9	smg-9 homolog, nonsense mediated mRNA decay factor (C. elegans) [Source:MGI Symbol;Acc:MGI:1919247]	protein_coding	12.2619	-0.42709	0.278731	unchanged	-0.0652029	0.874516	unchanged	0.328337	0.694678	unchanged	-0.467403	0.387921	unchanged	-0.545515	0.174425	unchanged	-1.01581	0.585974	unchanged	0.0483757	0.943769	unchanged	-0.139487	0.78204	unchanged
ENSMUSG00000002221	chr5	27740079	27791691	-	Paxip1	PAX interacting (with transcription-activation domain) protein 1 [Source:MGI Symbol;Acc:MGI:1890430]	protein_coding	47.7859	-0.315993	0.0888986	unchanged	1.03601	5.55166e-11	Up	0.150208	0.754122	unchanged	-0.478833	0.0268241	unchanged	-0.855575	2e-05	unchanged	-0.00649147	1	unchanged	-0.153414	0.574562	unchanged	-0.493623	0.00856014	unchanged
ENSMUSG00000002222	chr6	71388633	71440637	-	Rmnd5a	required for meiotic nuclear division 5 homolog A [Source:MGI Symbol;Acc:MGI:1915727]	protein_coding	81.8534	-0.926931	4.10211e-08	unchanged	-1.28684	6.43906e-15	Down	0.0457467	0.948553	unchanged	-0.367541	0.100147	unchanged	-0.0779471	0.806395	unchanged	0.096432	1	unchanged	0.422653	0.0781331	unchanged	0.30698	0.220953	unchanged
ENSMUSG00000002227	chr3	104794835	104818563	-	Mov10	Mov10 RISC complex RNA helicase [Source:MGI Symbol;Acc:MGI:97054]	protein_coding	51.4642	2.04851	8.95514e-14	Up	3.41429	3.84737e-35	Up	0.563033	0.327576	unchanged	-1.62357	1.21862e-08	Down	-1.1932	8.47e-06	Down	0.356289	1	unchanged	-0.746928	0.0185611	unchanged	-0.565304	0.0760587	unchanged
ENSMUSG00000002228	chr3	104781055	104786018	+	Ppm1j	protein phosphatase 1J [Source:MGI Symbol;Acc:MGI:1919137]	protein_coding	3.12127	-1.34363	0.0745572	unchanged	0.284798	0.702998	unchanged	-0.113453	0.962737	unchanged	-1.46698	0.266868	unchanged	-2.01385	0.0354171	Down	0.450039	1	unchanged	-0.192543	0.877335	unchanged	-1.02132	0.261045	unchanged
ENSMUSG00000002233	chr3	104788374	104794459	+	Rhoc	ras homolog family member C [Source:MGI Symbol;Acc:MGI:106028]	protein_coding	11.8282	2.63003	4.78263e-07	Up	4.20225	1.53103e-12	Up	0.749695	0.606524	unchanged	-1.9333	0.000179478	Down	-0.205113	0.719758	unchanged	1.85558	1	unchanged	0.199342	0.775231	unchanged	-0.0614613	0.938595	unchanged
ENSMUSG00000002249	chr17	28331670	28350817	-	Tead3	TEA domain family member 3 [Source:MGI Symbol;Acc:MGI:109241]	protein_coding	4.47034	-2.26396	0.00209407	Down	-1.52415	0.131534	unchanged	2.20878	0.000952191	Up	-0.94261	0.519193	unchanged	1.80947	0.00696912	Up	0.155648	1	unchanged	0.946741	0.586787	unchanged	-0.316232	0.817303	unchanged
ENSMUSG00000002250	chr17	28232699	28301474	+	Ppard	peroxisome proliferator activator receptor delta [Source:MGI Symbol;Acc:MGI:101884]	protein_coding	17.5807	-0.304048	0.398722	unchanged	1.2235	1.15178e-05	Up	0.637714	0.178785	unchanged	0.987724	0.00218003	unchanged	1.08928	0.00012994	Up	0.00411935	1	unchanged	-0.111131	0.835865	unchanged	0.530356	0.172689	unchanged
ENSMUSG00000002257	chr17	28207777	28228608	+	Def6	differentially expressed in FDCP 6 [Source:MGI Symbol;Acc:MGI:1346328]	protein_coding	3.50381	-0.35263	0.697838	unchanged	0.214567	0.794259	unchanged	-0.745196	0.704227	unchanged	-1.76403	0.141939	unchanged	0.29784	0.87748	unchanged	-0.145143	1	unchanged	0.00695324	0.99744	unchanged	-0.105461	0.938595	unchanged
ENSMUSG00000002265	chr7	6703891	6730431	-	Peg3	paternally expressed 3 [Source:MGI Symbol;Acc:MGI:104748]	protein_coding	5.48012	0.183087	0.863825	unchanged	-1.73353	0.0215747	Down	-0.0150864	1	unchanged	-0.377375	0.77426	unchanged	0.0298367	0.984763	unchanged	-0.192639	1	unchanged	1.13287	0.334903	unchanged	0.189932	0.886071	unchanged
ENSMUSG00000002274	chr17	25793220	25797136	-	Metrn	meteorin, glial cell differentiation regulator [Source:MGI Symbol;Acc:MGI:1917333]	protein_coding	0.765375	-0.572049	0.697034	unchanged	2.22214	0.0861322	unchanged	-2.05144	NA	unchanged	-0.617491	0.770671	unchanged	-0.0628333	0.983152	unchanged	0.765027	1	unchanged	-0.127929	NA	unchanged	-0.052781	NA	unchanged
ENSMUSG00000002279	chr17	25579084	25662826	+	Lmf1	lipase maturation factor 1 [Source:MGI Symbol;Acc:MGI:1923733]	protein_coding	2.72174	-0.851708	0.262711	unchanged	1.2421	0.039843	Up	-0.0787465	0.977215	unchanged	0.930586	0.296887	unchanged	0.732704	0.402314	unchanged	0.0280574	1	unchanged	-0.163463	0.882408	unchanged	0.13388	0.92155	unchanged
ENSMUSG00000002280	chr17	25773775	25783332	+	Ciao3	cytosolic iron-sulfur assembly component 3 [Source:MGI Symbol;Acc:MGI:1914813]	protein_coding	28.1044	-1.16931	6.77439e-11	Down	-0.739729	5.84223e-05	unchanged	0.00511598	1	unchanged	0.353055	0.156787	unchanged	0.325626	0.235858	unchanged	-0.153294	1	unchanged	-0.0260154	0.958418	unchanged	0.480204	0.068591	unchanged
ENSMUSG00000002289	chr17	33773749	33781830	-	Angptl4	angiopoietin-like 4 [Source:MGI Symbol;Acc:MGI:1888999]	protein_coding	17.0982	-0.664206	0.0548334	unchanged	0.304797	0.47121	unchanged	-0.161495	0.892516	unchanged	0.0978577	0.87933	unchanged	-0.0938247	0.888277	unchanged	0.0409529	1	unchanged	-0.543184	0.342149	unchanged	0.552965	0.250512	unchanged
ENSMUSG00000002297	chr5	8396972	8422716	-	Dbf4	DBF4 zinc finger [Source:MGI Symbol;Acc:MGI:1351328]	protein_coding	117.187	-0.139767	0.533734	unchanged	-0.377071	0.0447383	unchanged	-0.303228	0.422449	unchanged	-0.295604	0.213289	unchanged	-1.11788	3.34e-09	Down	-0.137389	1	unchanged	-0.417288	0.0950426	unchanged	-0.826438	4.34489e-05	unchanged
ENSMUSG00000002307	chr17	33909413	33915590	+	Daxx	Fas death domain-associated protein [Source:MGI Symbol;Acc:MGI:1197015]	protein_coding	30.2939	0.0580089	0.830786	unchanged	0.333534	0.0900959	unchanged	-0.221638	0.659816	unchanged	-0.173739	0.559429	unchanged	-0.449564	0.0479442	unchanged	0.0889725	1	unchanged	0.225659	0.435296	unchanged	-0.347117	0.146748	unchanged
ENSMUSG00000002308	chr17	33843090	33849774	+	Cd320	CD320 antigen [Source:MGI Symbol;Acc:MGI:1860083]	protein_coding	49.0391	-2.44562	4.73433e-37	Down	-2.19653	3.05837e-32	Down	-0.235123	0.566404	unchanged	-0.0683577	0.881102	unchanged	0.00888401	0.985817	unchanged	0.0581514	1	unchanged	0.355502	0.272934	unchanged	0.36632	0.205275	unchanged
ENSMUSG00000002319	chr14	55625399	55635957	-	Ipo4	importin 4 [Source:MGI Symbol;Acc:MGI:1923001]	protein_coding	92.2138	-1.53744	1.8444e-25	Down	-0.170913	0.326597	unchanged	-0.0657058	0.910009	unchanged	-0.38972	0.0551794	unchanged	-0.821694	4.95e-06	unchanged	-0.0405698	1	unchanged	-0.256586	0.27636	unchanged	-0.112304	0.68082	unchanged
ENSMUSG00000002320	chr14	55635964	55643806	-	Tm9sf1	transmembrane 9 superfamily member 1 [Source:MGI Symbol;Acc:MGI:1921390]	protein_coding	0.688782	0.969239	0.404827	unchanged	0.847349	0.565219	unchanged	0.421311	NA	unchanged	-0.799328	0.59162	unchanged	-0.991799	0.530675	unchanged	-0.316994	1	unchanged	0.997173	NA	unchanged	0.21121	NA	unchanged
ENSMUSG00000002324	chr14	55618036	55625395	+	Rec8	REC8 meiotic recombination protein [Source:MGI Symbol;Acc:MGI:1929645]	protein_coding	6.48616	1.03612	0.0167649	Up	0.784734	0.0994127	unchanged	-0.278863	0.871468	unchanged	-0.893116	0.0730047	unchanged	-0.71255	0.203528	unchanged	0.0180814	1	unchanged	0.373899	0.607731	unchanged	0.0272538	0.979287	unchanged
ENSMUSG00000002325	chr14	55603570	55610030	+	Irf9	interferon regulatory factor 9 [Source:MGI Symbol;Acc:MGI:107587]	protein_coding	10.9157	0.226488	0.590609	unchanged	-0.0498105	0.921883	unchanged	-0.185465	0.883275	unchanged	-1.12604	0.00707639	Down	-1.68514	0.000357962	Down	-0.0196313	1	unchanged	-0.55889	0.299293	unchanged	-0.538153	0.270508	unchanged
ENSMUSG00000002326	chr14	55671940	55679200	+	Gmpr2	guanosine monophosphate reductase 2 [Source:MGI Symbol;Acc:MGI:1917903]	protein_coding	5.98439	1.78165	9.13987e-05	Up	0.243538	0.6505	unchanged	-0.205704	0.928959	unchanged	-1.63768	0.00101447	Down	0.943433	0.0739344	unchanged	0.0366892	1	unchanged	0.177963	0.834548	unchanged	0.611314	0.308326	unchanged
ENSMUSG00000002329	chr14	55657878	55660508	-	Mdp1	magnesium-dependent phosphatase 1 [Source:MGI Symbol;Acc:MGI:1915131]	protein_coding	35.4796	0.0112429	0.967902	unchanged	0.422967	0.023646	unchanged	0.330518	0.307627	unchanged	0.300707	0.1753	unchanged	-0.107197	0.714681	unchanged	0.0947142	1	unchanged	-0.348795	0.187373	unchanged	0.0629033	0.871299	unchanged
ENSMUSG00000002332	chr14	55739019	55745690	-	Dhrs1	dehydrogenase/reductase (SDR family) member 1 [Source:MGI Symbol;Acc:MGI:1196314]	protein_coding	6.57417	-0.591565	0.245375	unchanged	0.280037	0.575844	unchanged	0.19095	0.906315	unchanged	-0.24348	0.775645	unchanged	-0.286297	0.671387	unchanged	-0.456311	1	unchanged	-0.232866	0.778566	unchanged	-0.820972	0.129714	unchanged
ENSMUSG00000002341	chr8	70093084	70120873	-	Ncan	neurocan [Source:MGI Symbol;Acc:MGI:104694]	protein_coding	0.356852	-1.33432	NA	unchanged	-1.79045	0.373648	unchanged	0.185374	NA	unchanged	-0.301998	NA	unchanged	0.658513	NA	unchanged	-0.879602	1	unchanged	1.18207	NA	unchanged	-0.14994	NA	unchanged
ENSMUSG00000002342	chr8	70172355	70183681	+	Tmem161a	transmembrane protein 161A [Source:MGI Symbol;Acc:MGI:2384577]	protein_coding	6.13466	2.62518	1.63363e-06	Up	3.34295	3.59665e-08	Up	-0.282321	0.926906	unchanged	-1.3509	0.00502583	Down	-0.942696	0.0299893	unchanged	-0.144717	1	unchanged	0.109548	0.878954	unchanged	-0.280051	0.595293	unchanged
ENSMUSG00000002343	chr8	70220171	70234466	-	Armc6	armadillo repeat containing 6 [Source:MGI Symbol;Acc:MGI:1924063]	protein_coding	19.327	-1.95515	2.52484e-15	Down	-0.911402	6.85409e-05	unchanged	-0.265006	0.593586	unchanged	0.650509	0.0540318	unchanged	0.543836	0.0626885	unchanged	0.164173	1	unchanged	0.166154	0.731557	unchanged	-0.575518	0.0866521	unchanged
ENSMUSG00000002345	chr8	70139498	70147319	+	Borcs8	BLOC-1 related complex subunit 8 [Source:MGI Symbol;Acc:MGI:1919618]	protein_coding	8.33677	-0.395121	0.331478	unchanged	0.237858	0.534756	unchanged	0.356235	0.660891	unchanged	-0.708186	0.176943	unchanged	-0.190976	0.740403	unchanged	0.0732368	1	unchanged	0.195127	0.746641	unchanged	0.510378	0.224845	unchanged
ENSMUSG00000002346	chr8	70184339	70212305	-	Slc25a42	solute carrier family 25, member 42 [Source:MGI Symbol;Acc:MGI:1920345]	protein_coding	1.85769	0.437796	0.645038	unchanged	0.339259	0.648198	unchanged	-0.128265	0.971724	unchanged	-0.926655	0.418676	unchanged	0.911829	0.387064	unchanged	-0.811088	1	unchanged	-0.238605	0.847598	unchanged	1.05799	0.212053	unchanged
ENSMUSG00000002365	chr17	5841328	5931954	+	Snx9	sorting nexin 9 [Source:MGI Symbol;Acc:MGI:1913866]	protein_coding	33.4875	0.824063	0.000312114	unchanged	0.637209	0.00187552	unchanged	0.214757	0.759252	unchanged	0.11147	0.754463	unchanged	0.413977	0.0655502	unchanged	-0.314693	1	unchanged	0.167199	0.638037	unchanged	0.202434	0.499263	unchanged
ENSMUSG00000002372	chr17	56673293	56711764	+	Ranbp3	RAN binding protein 3 [Source:MGI Symbol;Acc:MGI:1919060]	protein_coding	84.8955	-0.0428729	0.816895	unchanged	0.148216	0.306191	unchanged	0.199701	0.477683	unchanged	-0.452178	0.0033359	unchanged	-0.0793412	0.729548	unchanged	-0.203919	1	unchanged	-0.410409	0.013006	unchanged	-0.0661592	0.792314	unchanged
ENSMUSG00000002379	chr17	56717766	56722141	+	Ndufa11	NADH:ubiquinone oxidoreductase subunit A11 [Source:MGI Symbol;Acc:MGI:1917125]	protein_coding	221.348	-0.225687	0.094708	unchanged	0.874822	1.06653e-13	unchanged	0.0559747	0.90999	unchanged	-0.171819	0.313392	unchanged	-0.0435096	0.831099	unchanged	-0.0500063	1	unchanged	0.163356	0.389961	unchanged	0.00656884	0.97984	unchanged
ENSMUSG00000002384	chr4	123105164	123132099	+	Bmp8b	bone morphogenetic protein 8b [Source:MGI Symbol;Acc:MGI:107335]	protein_coding	1.54646	-2.68497	0.0209092	Down	-2.89518	0.00971711	Down	0.695425	0.792412	unchanged	-0.301999	0.903054	unchanged	1.00402	0.519798	unchanged	0.0669435	1	unchanged	0.821401	0.742045	unchanged	0.210733	0.941143	unchanged
ENSMUSG00000002393	chr8	71374122	71381960	-	Nr2f6	nuclear receptor subfamily 2, group F, member 6 [Source:MGI Symbol;Acc:MGI:1352453]	protein_coding	10.5156	-0.471221	0.46986	unchanged	1.18696	0.00526161	Up	-0.110533	0.960069	unchanged	0.549014	0.484031	unchanged	-0.0291104	0.971611	unchanged	-0.221391	1	unchanged	0.511614	0.364981	unchanged	0.0589474	0.938595	unchanged
ENSMUSG00000002395	chr8	71366847	71369732	+	Use1	unconventional SNARE in the ER 1 homolog (S. cerevisiae) [Source:MGI Symbol;Acc:MGI:1914273]	protein_coding	70.547	-0.0716697	0.68734	unchanged	0.531302	1.54847e-05	unchanged	0.195234	0.499087	unchanged	0.064989	0.784133	unchanged	-0.657184	3.78e-06	unchanged	-0.138734	1	unchanged	0.0454119	0.855282	unchanged	0.00255072	0.992941	unchanged
ENSMUSG00000002396	chr8	71371297	71379361	+	Ocel1	occludin/ELL domain containing 1 [Source:MGI Symbol;Acc:MGI:1924340]	protein_coding	15.474	-1.67714	1.80721e-07	Down	-0.75947	0.0257421	unchanged	-0.00722927	1	unchanged	0.527642	0.249322	unchanged	0.38386	0.377093	unchanged	0.191288	1	unchanged	0.509929	0.326894	unchanged	0.258196	0.653476	unchanged
ENSMUSG00000002409	chr7	28179468	28187294	+	Dyrk1b	dual-specificity tyrosine-(Y)-phosphorylation regulated kinase 1b [Source:MGI Symbol;Acc:MGI:1330302]	protein_coding	2.99474	1.18681	0.0495071	Up	1.69029	0.0123745	Up	-0.172548	0.950728	unchanged	-0.940934	0.183565	unchanged	-0.781138	0.242778	unchanged	0.42043	1	unchanged	-0.598093	0.540973	unchanged	-0.224475	0.819945	unchanged
ENSMUSG00000002413	chr6	39603236	39725463	-	Braf	Braf transforming gene [Source:MGI Symbol;Acc:MGI:88190]	protein_coding	25.1313	0.137197	0.621952	unchanged	0.103892	0.709526	unchanged	-0.17737	0.798989	unchanged	-0.872447	0.000751758	unchanged	-0.323296	0.3182	unchanged	0.01881	1	unchanged	0.0816809	0.853714	unchanged	-0.441004	0.148661	unchanged
ENSMUSG00000002416	chr6	39592573	39603382	+	Ndufb2	NADH:ubiquinone oxidoreductase subunit B2 [Source:MGI Symbol;Acc:MGI:1915448]	protein_coding	140.755	-1.15219	2.88259e-15	Down	1.23852	4.47534e-18	Up	-0.0174499	0.979632	unchanged	0.110012	0.668069	unchanged	-0.109406	0.585667	unchanged	0.123378	1	unchanged	0.294945	0.136713	unchanged	0.176655	0.394338	unchanged
ENSMUSG00000002428	chr3	20057810	20118490	+	Hltf	helicase-like transcription factor [Source:MGI Symbol;Acc:MGI:1196437]	protein_coding	15.8882	0.426222	0.123301	unchanged	0.446457	0.0548449	unchanged	0.0270266	0.984952	unchanged	-0.55019	0.0817538	unchanged	-1.384	8.37e-07	Down	0.0560553	1	unchanged	-1.32332	4.55432e-06	Down	-1.64421	2.19237e-08	Down
ENSMUSG00000002455	chr2	181591867	181655660	+	Prpf6	pre-mRNA splicing factor 6 [Source:MGI Symbol;Acc:MGI:1922946]	protein_coding	31.9327	1.43066	7.76079e-19	Up	-0.131975	0.524475	unchanged	0.156752	0.781876	unchanged	-0.156994	0.457187	unchanged	-0.0625253	0.854188	unchanged	-0.0348104	1	unchanged	-0.343435	0.20821	unchanged	-0.0516854	0.888188	unchanged
ENSMUSG00000002458	chr2	181688418	181693977	-	Rgs19	regulator of G-protein signaling 19 [Source:MGI Symbol;Acc:MGI:1915153]	protein_coding	6.30927	0.752408	0.244069	unchanged	1.51623	0.000969048	Up	0.168362	0.947372	unchanged	-3.20846	0.00116552	Down	-3.75685	5.09e-05	Down	0.689075	1	unchanged	-0.359967	0.638193	unchanged	-1.07402	0.059395	unchanged
ENSMUSG00000002475	chr18	10642091	10706771	-	Abhd3	abhydrolase domain containing 3 [Source:MGI Symbol;Acc:MGI:2147183]	protein_coding	3.0064	-2.72307	0.000108924	Down	-2.80784	1.52848e-05	Down	0.334212	0.850637	unchanged	-0.316932	0.8543	unchanged	-0.817593	0.4767	unchanged	-0.423022	1	unchanged	0.252082	0.879611	unchanged	-0.772385	0.52181	unchanged
ENSMUSG00000002477	chr18	10617774	10642079	+	Snrpd1	small nuclear ribonucleoprotein D1 [Source:MGI Symbol;Acc:MGI:98344]	protein_coding	140.391	0.736366	2.38337e-10	unchanged	-0.593513	3.7206e-07	unchanged	0.0146229	0.980647	unchanged	-0.148848	0.351833	unchanged	-0.254448	0.107434	unchanged	-0.0114929	1	unchanged	-0.0468202	0.854847	unchanged	0.138451	0.456436	unchanged
ENSMUSG00000002486	chr5	114707759	114722327	+	Tchp	trichoplein, keratin filament binding [Source:MGI Symbol;Acc:MGI:1925082]	protein_coding	4.38752	0.972737	0.0307424	unchanged	0.0755208	0.919997	unchanged	0.60655	0.55577	unchanged	-0.788905	0.134528	unchanged	-0.955171	0.0939068	unchanged	0.417092	1	unchanged	-0.0593986	0.961364	unchanged	0.38356	0.587515	unchanged
ENSMUSG00000002489	chr16	89787110	90143769	-	Tiam1	T cell lymphoma invasion and metastasis 1 [Source:MGI Symbol;Acc:MGI:103306]	protein_coding	6.97699	-2.22578	5.90874e-09	Down	-3.20769	2.74712e-14	Down	-0.0475379	0.967344	unchanged	0.436934	0.526771	unchanged	1.04069	0.0360053	Up	-0.112151	1	unchanged	0.348966	0.747797	unchanged	-0.307888	0.709249	unchanged
ENSMUSG00000002496	chr17	24595815	24632630	-	Tsc2	TSC complex subunit 2 [Source:MGI Symbol;Acc:MGI:102548]	protein_coding	29.6645	-0.390395	0.0639479	unchanged	0.574571	0.00196938	unchanged	0.0920125	0.897651	unchanged	-0.204564	0.514058	unchanged	-0.474711	0.0429962	unchanged	-0.105715	1	unchanged	0.0442847	0.910642	unchanged	0.0925438	0.793266	unchanged
ENSMUSG00000002500	chr17	24727819	24736143	+	Rpl3l	ribosomal protein L3-like [Source:MGI Symbol;Acc:MGI:1913461]	protein_coding	0.361082	-0.634238	NA	unchanged	0.214853	0.942077	unchanged	0.712242	NA	unchanged	0	NA	unchanged	0	NA	unchanged	0.974163	1	unchanged	-0.26062	NA	unchanged	-0.14994	NA	unchanged
ENSMUSG00000002504	chr17	24639285	24650327	-	Slc9a3r2	solute carrier family 9 (sodium/hydrogen exchanger), member 3 regulator 2 [Source:MGI Symbol;Acc:MGI:1890662]	protein_coding	1.36239	-0.634238	0.726132	unchanged	0.228063	0.901047	unchanged	0.365902	NA	unchanged	0	1	unchanged	-1.86121	0.207538	unchanged	0.517067	1	unchanged	1.13798	0.547761	unchanged	0.00579074	0.99923	unchanged
ENSMUSG00000002524	chr15	76070181	76080924	-	Puf60	poly-U binding splicing factor 60 [Source:MGI Symbol;Acc:MGI:1915209]	protein_coding	74.4682	0.472761	0.000769968	unchanged	-0.0305272	0.874636	unchanged	0.0737274	0.889752	unchanged	-0.0852646	0.703611	unchanged	-0.273208	0.129697	unchanged	-0.167038	1	unchanged	-0.448982	0.00949259	unchanged	-0.119039	0.594988	unchanged
ENSMUSG00000002546	chr2	32287383	32307921	+	Golga2	golgi autoantigen, golgin subfamily a, 2 [Source:MGI Symbol;Acc:MGI:2139395]	protein_coding	15.2512	0.351448	0.201893	unchanged	0.518701	0.0398957	unchanged	-0.188582	0.823708	unchanged	0.25845	0.433641	unchanged	0.164145	0.666094	unchanged	-0.0603827	1	unchanged	0.0552907	0.915042	unchanged	0.04925	0.923588	unchanged
ENSMUSG00000002550	chr2	32255001	32260159	-	Uck1	uridine-cytidine kinase 1 [Source:MGI Symbol;Acc:MGI:98904]	protein_coding	24.3626	-0.595815	0.00989645	unchanged	0.523256	0.0238921	unchanged	-0.129894	0.869388	unchanged	-0.400091	0.218991	unchanged	0.279472	0.282693	unchanged	0.120118	1	unchanged	0.63498	0.0133611	unchanged	-0.335985	0.215921	unchanged
ENSMUSG00000002565	chr12	40059768	40134228	-	Scin	scinderin [Source:MGI Symbol;Acc:MGI:1306794]	protein_coding	0.634334	0.0729893	0.966504	unchanged	-1.64098	0.206083	unchanged	1.27544	NA	unchanged	-0.451105	0.829532	unchanged	1.08351	0.501902	unchanged	0.21372	1	unchanged	0.460727	NA	unchanged	2.4314	NA	unchanged
ENSMUSG00000002578	chr10	128630842	128669358	-	Ikzf4	IKAROS family zinc finger 4 [Source:MGI Symbol;Acc:MGI:1343139]	protein_coding	1.19696	1.24731	0.29434	unchanged	0.0501896	0.971382	unchanged	-0.718804	NA	unchanged	-1.11605	0.444549	unchanged	-1.08266	0.477585	unchanged	-1.49563	1	unchanged	1.40036	NA	unchanged	1.72737	0.0773685	unchanged
ENSMUSG00000002580	chr11	98437707	98438991	-	Mien1	migration and invasion enhancer 1 [Source:MGI Symbol;Acc:MGI:1913678]	protein_coding	121.14	-1.05087	5.02091e-11	Down	-0.853761	1.32841e-07	unchanged	-0.200686	0.609922	unchanged	0.810257	3.30453e-06	unchanged	1.06355	9.59e-10	Up	0.1521	1	unchanged	0.452085	0.0390556	unchanged	0.385033	0.0740876	unchanged
ENSMUSG00000002602	chr7	25757272	25788705	-	Axl	AXL receptor tyrosine kinase [Source:MGI Symbol;Acc:MGI:1347244]	protein_coding	0.468674	0.0871084	0.977348	unchanged	-0.506493	0.855954	unchanged	0.365902	NA	unchanged	0.0586749	NA	unchanged	-0.0628332	NA	unchanged	0.0436796	1	unchanged	0	NA	unchanged	-0.875448	NA	unchanged
ENSMUSG00000002603	chr7	25687001	25705077	+	Tgfb1	transforming growth factor, beta 1 [Source:MGI Symbol;Acc:MGI:98725]	protein_coding	0.388931	-1.61229	0.397823	unchanged	-0.14582	0.956043	unchanged	0.193635	NA	unchanged	0.0586749	NA	unchanged	0.658513	NA	unchanged	0.443538	1	unchanged	0.460727	NA	unchanged	-0.14994	NA	unchanged
ENSMUSG00000002608	chr7	25711105	25719088	-	Ccdc97	coiled-coil domain containing 97 [Source:MGI Symbol;Acc:MGI:1196455]	protein_coding	28.9603	0.198553	0.340981	unchanged	0.693011	0.000111924	unchanged	-0.0690912	0.926906	unchanged	-0.286028	0.227647	unchanged	-0.0656207	0.845695	unchanged	0.0920501	1	unchanged	-0.150797	0.637659	unchanged	-0.282948	0.271694	unchanged
ENSMUSG00000002617	chr17	23173868	23193252	-	Zfp40	zinc finger protein 40 [Source:MGI Symbol;Acc:MGI:99185]	protein_coding	0.942124	1.12068	0.422029	unchanged	0.573502	0.716224	unchanged	1.54794	NA	unchanged	0.0587658	0.98742	unchanged	0.692223	0.663501	unchanged	0.734357	1	unchanged	-0.619269	NA	unchanged	-0.135789	0.958286	unchanged
ENSMUSG00000002625	chr17	32321423	32350607	-	Akap8l	A kinase (PRKA) anchor protein 8-like [Source:MGI Symbol;Acc:MGI:1860606]	protein_coding	17.9406	-0.622258	0.00603815	unchanged	-0.921582	6.9638e-05	unchanged	-0.301901	0.526206	unchanged	0.137641	0.72366	unchanged	-0.128116	0.754721	unchanged	0.17924	1	unchanged	-0.405075	0.355837	unchanged	-0.210031	0.593913	unchanged
ENSMUSG00000002635	chr7	34184498	34196661	-	Pdcd2l	programmed cell death 2-like [Source:MGI Symbol;Acc:MGI:1915329]	protein_coding	58.199	-0.340996	0.0217352	unchanged	-0.720721	1.84847e-07	unchanged	-0.120493	0.768914	unchanged	0.0114499	0.979419	unchanged	-0.550782	0.00128619	unchanged	-0.0704824	1	unchanged	-0.368971	0.0856663	unchanged	-0.524305	0.00343101	unchanged
ENSMUSG00000002658	chr17	57003404	57011288	-	Gtf2f1	general transcription factor IIF, polypeptide 1 [Source:MGI Symbol;Acc:MGI:1923848]	protein_coding	83.3252	-0.136354	0.415031	unchanged	-0.0954723	0.58093	unchanged	-0.0621108	0.911624	unchanged	-0.0545531	0.836141	unchanged	0.00426329	0.992453	unchanged	-0.0830781	1	unchanged	0.0124741	0.972407	unchanged	0.0779849	0.768577	unchanged
ENSMUSG00000002660	chr17	56990304	56996188	+	Clpp	caseinolytic mitochondrial matrix peptidase proteolytic subunit [Source:MGI Symbol;Acc:MGI:1858213]	protein_coding	135.979	-0.716404	1.2667e-07	unchanged	-0.0169934	0.93685	unchanged	0.0207597	0.973744	unchanged	0.316726	0.0598909	unchanged	0.346439	0.0349185	unchanged	0.101741	1	unchanged	0.00277614	0.995125	unchanged	0.250213	0.186814	unchanged
ENSMUSG00000002661	chr17	56997338	56999322	+	Alkbh7	alkB homolog 7 [Source:MGI Symbol;Acc:MGI:1913650]	protein_coding	41.4506	0.172644	0.404827	unchanged	1.02539	5.05295e-11	Up	0.0661009	0.926906	unchanged	-0.0601292	0.856833	unchanged	-0.163489	0.512096	unchanged	0.0802513	1	unchanged	-0.223525	0.352757	unchanged	-0.147465	0.56085	unchanged
ENSMUSG00000002668	chr17	57065904	57078514	-	Dennd1c	DENN/MADD domain containing 1C [Source:MGI Symbol;Acc:MGI:1918035]	protein_coding	2.79592	-1.49831	0.111584	unchanged	-1.50444	0.175584	unchanged	1.25626	0.195142	unchanged	-0.624428	0.732907	unchanged	-2.22723	0.0388165	Down	-0.160526	1	unchanged	-0.621293	0.785949	unchanged	-0.828599	0.653419	unchanged
ENSMUSG00000002679	chr12	81573556	81595008	-	Med6	mediator complex subunit 6 [Source:MGI Symbol;Acc:MGI:1917042]	protein_coding	53.2852	-0.4443	0.00341961	unchanged	-1.40931	2.27128e-21	Down	0.109663	0.80989	unchanged	0.343092	0.0549752	unchanged	-0.161327	0.520989	unchanged	-0.11098	1	unchanged	0.0534132	0.886342	unchanged	-0.137806	0.648346	unchanged
ENSMUSG00000002688	chr12	50341230	50649098	-	Prkd1	protein kinase D1 [Source:MGI Symbol;Acc:MGI:99879]	protein_coding	0.540522	-0.273565	0.898844	unchanged	-2.41142	0.0887501	unchanged	0.00522893	NA	unchanged	0.0586749	NA	unchanged	-1.1153	NA	unchanged	-0.789426	1	unchanged	0.460727	NA	unchanged	-0.14994	NA	unchanged
ENSMUSG00000002718	chr2	166906039	166946389	+	Cse1l	chromosome segregation 1-like (S. cerevisiae) [Source:MGI Symbol;Acc:MGI:1339951]	protein_coding	149.163	-0.471996	1.56516e-05	unchanged	-0.47083	9.18166e-06	unchanged	-0.0476304	0.912392	unchanged	-0.311952	0.0205563	unchanged	-0.372016	0.00258654	unchanged	-0.0221256	1	unchanged	-0.176682	0.310704	unchanged	-0.272683	0.0707988	unchanged
ENSMUSG00000002728	chr2	145902098	145916425	+	Naa20	N(alpha)-acetyltransferase 20, NatB catalytic subunit [Source:MGI Symbol;Acc:MGI:1915127]	protein_coding	90.8015	0.731852	2.36403e-05	unchanged	-0.427497	0.017779	unchanged	0.295974	0.415229	unchanged	0.194837	0.413226	unchanged	0.589366	0.00237268	unchanged	0.0962189	1	unchanged	0.0952724	0.787794	unchanged	0.272259	0.280132	unchanged
ENSMUSG00000002731	chr2	76629897	76648015	-	Prkra	protein kinase, interferon inducible double stranded RNA dependent activator [Source:MGI Symbol;Acc:MGI:1344375]	protein_coding	2.58038	-0.0529219	0.966245	unchanged	-0.532921	0.481359	unchanged	-1.46654	0.474491	unchanged	-0.683143	0.604303	unchanged	0.457036	0.622197	unchanged	-0.201853	1	unchanged	0.107391	0.947894	unchanged	-0.214893	0.890717	unchanged
ENSMUSG00000002732	chr2	76663043	76673116	-	Fkbp7	FK506 binding protein 7 [Source:MGI Symbol;Acc:MGI:1336879]	protein_coding	0.399359	1.17398	0.507794	unchanged	-0.506494	0.796125	unchanged	0.00522893	NA	unchanged	-1.0282	NA	unchanged	-1.4305	NA	unchanged	-0.316994	1	unchanged	1.54495	NA	unchanged	1.15519	NA	unchanged
ENSMUSG00000002733	chr2	76675280	76696828	+	Plekha3	pleckstrin homology domain-containing, family A (phosphoinositide binding specific) member 3 [Source:MGI Symbol;Acc:MGI:1932515]	protein_coding	33.9529	-1.06457	0.00429266	Down	-0.462846	0.210443	unchanged	-0.484326	0.558554	unchanged	-2.72865	9.434e-07	Down	-2.73883	9.57e-12	Down	0.292369	1	unchanged	0.555919	0.264225	unchanged	-0.682027	0.120049	unchanged
ENSMUSG00000002741	chr11	5955692	5967780	+	Ykt6	YKT6 v-SNARE homolog (S. cerevisiae) [Source:MGI Symbol;Acc:MGI:1927550]	protein_coding	55.6501	-0.245169	0.201442	unchanged	-0.489076	0.0049103	unchanged	0.0163632	0.986473	unchanged	0.192908	0.429823	unchanged	0.721515	0.000305726	unchanged	0.0556259	1	unchanged	0.0506584	0.894766	unchanged	-0.116281	0.711978	unchanged
ENSMUSG00000002748	chr5	135187263	135246129	+	Baz1b	bromodomain adjacent to zinc finger domain, 1B [Source:MGI Symbol;Acc:MGI:1353499]	protein_coding	30.4987	0.625342	0.000596913	unchanged	-0.522809	0.00308574	unchanged	-0.0870949	0.911123	unchanged	-0.46837	0.0244828	unchanged	-0.985582	1.38e-05	unchanged	-0.345138	1	unchanged	0.293738	0.287575	unchanged	0.0338748	0.935002	unchanged
ENSMUSG00000002763	chr17	46711462	46725541	+	Pex6	peroxisomal biogenesis factor 6 [Source:MGI Symbol;Acc:MGI:2385054]	protein_coding	16.907	-0.480803	0.12904	unchanged	1.17862	8.24897e-06	Up	-0.0622902	0.95764	unchanged	0.242502	0.598736	unchanged	-0.0839062	0.835472	unchanged	0.244534	1	unchanged	0.373887	0.297358	unchanged	0.0649993	0.898244	unchanged
ENSMUSG00000002767	chr17	46646228	46650139	+	Mrpl2	mitochondrial ribosomal protein L2 [Source:MGI Symbol;Acc:MGI:1351622]	protein_coding	42.4865	0.18352	0.368398	unchanged	1.18415	3.37915e-13	Up	0.141089	0.791784	unchanged	0.0123977	0.982507	unchanged	0.0331882	0.905845	unchanged	0.115414	1	unchanged	-0.398419	0.0635757	unchanged	-0.285142	0.225446	unchanged
ENSMUSG00000002768	chr17	46678792	46683111	+	Mea1	male enhanced antigen 1 [Source:MGI Symbol;Acc:MGI:96957]	protein_coding	63.3955	0.172332	0.369798	unchanged	1.09503	1.75981e-12	Up	-0.122502	0.821012	unchanged	0.313967	0.107483	unchanged	0.3731	0.0351812	unchanged	0.168595	1	unchanged	-0.0366467	0.913996	unchanged	-0.0982157	0.722252	unchanged
ENSMUSG00000002769	chr17	46725663	46729168	-	Gnmt	glycine N-methyltransferase [Source:MGI Symbol;Acc:MGI:1202304]	protein_coding	0.731416	-0.273565	0.881205	unchanged	1.8476	0.148144	unchanged	0.00522893	NA	unchanged	0.780022	0.704412	unchanged	-0.78418	0.667011	unchanged	1.12909	1	unchanged	-1.89336	NA	unchanged	0.571407	NA	unchanged
ENSMUSG00000002771	chr7	45831882	45878378	-	Grin2d	glutamate receptor, ionotropic, NMDA2D (epsilon 4) [Source:MGI Symbol;Acc:MGI:95823]	protein_coding	1.59127	-3.13031	5.25674e-05	Down	-2.54282	0.00836095	Down	-0.0568096	0.981014	unchanged	0.793085	0.557538	unchanged	1.00898	0.522277	unchanged	0.167901	1	unchanged	-0.26062	0.92176	unchanged	-0.144205	0.955942	unchanged
ENSMUSG00000002778	chr7	45872771	45883732	+	Kdelr1	KDEL (Lys-Asp-Glu-Leu) endoplasmic reticulum protein retention receptor 1 [Source:MGI Symbol;Acc:MGI:1915387]	protein_coding	76.4909	0.952851	3.07433e-09	unchanged	1.55443	2.16713e-23	Up	0.101993	0.873906	unchanged	0.109289	0.653846	unchanged	0.71162	1.24e-06	unchanged	0.171278	1	unchanged	0.177244	0.466463	unchanged	0.263465	0.18022	unchanged
ENSMUSG00000002781	chr7	45896940	45917413	+	Tmem143	transmembrane protein 143 [Source:MGI Symbol;Acc:MGI:1917459]	protein_coding	1.72618	2.36062	0.017273	Up	3.23625	0.0003932	Up	0.68138	0.869673	unchanged	-0.686396	0.537728	unchanged	1.13729	0.144009	unchanged	-0.316994	1	unchanged	-0.767491	0.451755	unchanged	-0.389535	0.7304	unchanged
ENSMUSG00000002797	chr6	54982579	54992950	-	Ggct	gamma-glutamyl cyclotransferase [Source:MGI Symbol;Acc:MGI:95700]	protein_coding	7.79547	0.207131	0.780868	unchanged	0.463139	0.385166	unchanged	-1.06149	0.429186	unchanged	-1.41782	0.0807942	unchanged	-1.80001	0.00228169	Down	0.478153	1	unchanged	0.0423888	0.970367	unchanged	-0.84946	0.062127	unchanged
ENSMUSG00000002799	chr12	112907818	112929776	-	Jag2	jagged 2 [Source:MGI Symbol;Acc:MGI:1098270]	protein_coding	6.19158	-3.26354	2.02999e-08	Down	-3.8578	4.24336e-11	Down	-1.25788	0.0505287	unchanged	-0.592399	0.651644	unchanged	0.0752444	0.94787	unchanged	-0.309038	1	unchanged	0.592108	0.658543	unchanged	0.69616	0.404252	unchanged
ENSMUSG00000002803	chr12	112976481	112978945	+	Btbd6	BTB (POZ) domain containing 6 [Source:MGI Symbol;Acc:MGI:3026623]	protein_coding	13.1212	-0.971727	0.00173376	unchanged	0.215256	0.525991	unchanged	-0.212177	0.813189	unchanged	-0.389101	0.436889	unchanged	-0.512559	0.221531	unchanged	0.205066	1	unchanged	-0.349742	0.467631	unchanged	-0.265182	0.572725	unchanged
ENSMUSG00000002804	chr12	112934290	112942124	-	Nudt14	nudix (nucleoside diphosphate linked moiety X)-type motif 14 [Source:MGI Symbol;Acc:MGI:1913424]	protein_coding	12.9639	0.280096	0.626029	unchanged	1.30875	1.67305e-05	Up	-0.62987	0.61719	unchanged	-1.03239	0.109439	unchanged	-0.653191	0.0399432	unchanged	-0.0779351	1	unchanged	-0.0938038	0.871056	unchanged	-0.0879746	0.861288	unchanged
ENSMUSG00000002808	chr13	19591705	19619927	-	Epdr1	ependymin related protein 1 (zebrafish) [Source:MGI Symbol;Acc:MGI:2145369]	protein_coding	0.824143	0	1	unchanged	0.214853	0.950991	unchanged	0	NA	unchanged	0.419348	0.921328	unchanged	-0.784179	0.827463	unchanged	-0.316993	1	unchanged	-0.26062	NA	unchanged	-0.871911	0.834924	unchanged
ENSMUSG00000002812	chr11	60714122	60727263	-	Flii	flightless I actin binding protein [Source:MGI Symbol;Acc:MGI:1342286]	protein_coding	58.4022	-0.104952	0.643216	unchanged	0.272716	0.156177	unchanged	0.201763	0.638753	unchanged	0.814545	5.07552e-06	unchanged	1.24182	2.92e-12	Up	0.211241	1	unchanged	0.237566	0.387173	unchanged	0.523043	0.0141902	unchanged
ENSMUSG00000002814	chr11	60740057	60777365	-	Top3a	topoisomerase (DNA) III alpha [Source:MGI Symbol;Acc:MGI:1197527]	protein_coding	7.17948	0.455535	0.25892	unchanged	0.31781	0.463075	unchanged	-0.231782	0.869673	unchanged	0.133679	0.826975	unchanged	-0.154366	0.790796	unchanged	-0.109036	1	unchanged	-0.198527	0.788502	unchanged	0.214436	0.728326	unchanged
ENSMUSG00000002820	chr9	21265292	21277772	+	Atg4d	autophagy related 4D, cysteine peptidase [Source:MGI Symbol;Acc:MGI:2444308]	protein_coding	48.5184	-0.748034	5.89658e-05	unchanged	0.306069	0.117947	unchanged	0.186598	0.688896	unchanged	0.39221	0.0922182	unchanged	0.620052	0.00129083	unchanged	-0.310302	1	unchanged	-0.180054	0.571368	unchanged	0.0985896	0.772481	unchanged
ENSMUSG00000002825	chr9	21411836	21420274	+	Qtrt1	queuine tRNA-ribosyltransferase catalytic subunit 1 [Source:MGI Symbol;Acc:MGI:1931441]	protein_coding	38.315	-0.92965	3.96797e-07	unchanged	-0.100589	0.650243	unchanged	0.0180307	0.984632	unchanged	-0.0864625	0.812028	unchanged	-0.761775	0.000555148	unchanged	0.0745878	1	unchanged	-0.403471	0.121193	unchanged	-0.265649	0.341271	unchanged
ENSMUSG00000002833	chr17	56079633	56100607	+	Hdgfl2	HDGF like 2 [Source:MGI Symbol;Acc:MGI:1194492]	protein_coding	36.2379	0.959636	3.77621e-10	unchanged	0.202307	0.250522	unchanged	-0.286463	0.454051	unchanged	-0.373695	0.0308918	unchanged	-0.0374752	0.89867	unchanged	-0.0226613	1	unchanged	-0.27033	0.271653	unchanged	-0.538396	0.00514436	unchanged
ENSMUSG00000002835	chr17	56040438	56072289	+	Chaf1a	chromatin assembly factor 1, subunit A (p150) [Source:MGI Symbol;Acc:MGI:1351331]	protein_coding	40.6236	0.480638	0.0055416	unchanged	0.394129	0.0222901	unchanged	-0.252288	0.541486	unchanged	-0.414514	0.0369987	unchanged	-0.193535	0.442253	unchanged	-0.0975669	1	unchanged	0.196014	0.462024	unchanged	-0.0875052	0.763211	unchanged
ENSMUSG00000002844	chr16	38444029	38452703	-	Adprh	ADP-ribosylarginine hydrolase [Source:MGI Symbol;Acc:MGI:1098234]	protein_coding	140.955	0.288038	0.0413287	unchanged	0.434539	0.000900226	unchanged	0.0199165	0.975469	unchanged	-0.119536	0.548634	unchanged	-0.378403	0.0116391	unchanged	-0.00732081	1	unchanged	-0.442171	0.0062632	unchanged	-0.480403	0.00143425	unchanged
ENSMUSG00000002845	chr16	38558697	38592162	+	Tmem39a	transmembrane protein 39a [Source:MGI Symbol;Acc:MGI:1915096]	protein_coding	69.6785	0.254148	0.203412	unchanged	0.73425	1.34844e-05	unchanged	-0.38411	0.245217	unchanged	-0.500603	0.0164628	unchanged	-0.899542	2.76e-06	unchanged	-0.0127158	1	unchanged	-0.0650522	0.849525	unchanged	-0.518596	0.0116846	unchanged
ENSMUSG00000002846	chr16	38498346	38522663	-	Timmdc1	translocase of inner mitochondrial membrane domain containing 1 [Source:MGI Symbol;Acc:MGI:1922139]	protein_coding	17.1065	-1.32241	0.000103992	Down	0.477951	0.314538	unchanged	0.432656	0.561859	unchanged	0.700827	0.100696	unchanged	0.306906	0.517458	unchanged	-0.0558736	1	unchanged	-0.332532	0.671572	unchanged	0.236713	0.74666	unchanged
ENSMUSG00000002847	chr16	38396116	38433145	-	Pla1a	phospholipase A1 member A [Source:MGI Symbol;Acc:MGI:1934677]	protein_coding	3.85473	0.445637	0.515759	unchanged	1.35972	0.024747	Up	0.563703	0.704101	unchanged	0.972127	0.114096	unchanged	0.94669	0.122899	unchanged	0.0947197	1	unchanged	-0.336977	0.743485	unchanged	-0.835377	0.27013	unchanged
ENSMUSG00000002870	chr6	88883473	88898780	-	Mcm2	minichromosome maintenance complex component 2 [Source:MGI Symbol;Acc:MGI:105380]	protein_coding	264.507	-0.543613	6.68501e-06	unchanged	-0.537127	6.82929e-06	unchanged	0.0775975	0.860269	unchanged	-0.263894	0.081973	unchanged	-0.128331	0.450646	unchanged	0.137867	1	unchanged	0.238031	0.176798	unchanged	0.0084316	0.975309	unchanged
ENSMUSG00000002871	chr6	88902250	88912238	+	Tpra1	transmembrane protein, adipocyte asscociated 1 [Source:MGI Symbol;Acc:MGI:1345190]	protein_coding	12.7622	-0.0319531	0.954744	unchanged	0.736531	0.0256625	unchanged	-0.0799727	0.955668	unchanged	0.493552	0.240302	unchanged	0.174339	0.671474	unchanged	0.608368	1	unchanged	-0.0977106	0.880881	unchanged	0.0736192	0.9066	unchanged
ENSMUSG00000002881	chr1	52457293	52500679	-	Nab1	Ngfi-A binding protein 1 [Source:MGI Symbol;Acc:MGI:107564]	protein_coding	9.09576	-0.479338	0.399931	unchanged	-0.214524	0.695924	unchanged	-0.119711	0.952617	unchanged	0.918619	0.113278	unchanged	1.34265	0.0151494	Up	-0.126157	1	unchanged	-0.564745	0.432861	unchanged	-0.135614	0.895435	unchanged
ENSMUSG00000002885	chr8	83723250	83741326	-	Adgre5	adhesion G protein-coupled receptor E5 [Source:MGI Symbol;Acc:MGI:1347095]	protein_coding	76.1374	-0.0814301	0.805197	unchanged	0.630006	0.00976215	unchanged	0.129371	0.881385	unchanged	0.0621055	0.895185	unchanged	0.347297	0.2152	unchanged	0.782539	0.553579	unchanged	0.29162	0.44176	unchanged	0.533974	0.0735836	unchanged
ENSMUSG00000002897	chr6	120463246	120487559	+	Il17ra	interleukin 17 receptor A [Source:MGI Symbol;Acc:MGI:107399]	protein_coding	2.85697	0.173058	0.792949	unchanged	-1.68676	0.00320366	Down	-0.107737	0.958887	unchanged	0.307999	0.66948	unchanged	-0.304371	0.774165	unchanged	-0.314762	1	unchanged	0.685796	0.522399	unchanged	-0.925753	0.193011	unchanged
ENSMUSG00000002900	chr12	31265233	31329644	+	Lamb1	laminin B1 [Source:MGI Symbol;Acc:MGI:96743]	protein_coding	83.5785	3.5195	1.28963e-30	Up	2.22459	1.59794e-14	Up	-0.481104	0.582707	unchanged	-1.12947	0.000415592	Down	-1.29909	5.09e-05	Down	-0.289559	1	unchanged	0.1672	0.771667	unchanged	0.452708	0.258014	unchanged
ENSMUSG00000002908	chr8	70842048	70863258	-	Kcnn1	potassium intermediate/small conductance calcium-activated channel, subfamily N, member 1 [Source:MGI Symbol;Acc:MGI:1933993]	protein_coding	1.23286	-0.612455	0.544315	unchanged	-0.284695	0.810847	unchanged	-0.391177	NA	unchanged	1.22678	0.222299	unchanged	0.862697	0.569711	unchanged	-0.108007	1	unchanged	0.727796	NA	unchanged	0.0892962	0.956769	unchanged
ENSMUSG00000002910	chr8	70835128	70839720	-	Arrdc2	arrestin domain containing 2 [Source:MGI Symbol;Acc:MGI:1918057]	protein_coding	2.94203	-2.38055	0.0006681	Down	-0.972733	0.212732	unchanged	0.0307398	1	unchanged	0.0491598	0.986985	unchanged	-0.301092	0.846091	unchanged	0.515491	1	unchanged	-0.703648	0.650279	unchanged	-1.12124	0.315602	unchanged
ENSMUSG00000002948	chr8	4238739	4247897	+	Map2k7	mitogen-activated protein kinase kinase 7 [Source:MGI Symbol;Acc:MGI:1346871]	protein_coding	29.7352	-0.129835	0.610467	unchanged	0.635648	0.000162009	unchanged	0.0178527	0.988016	unchanged	-0.111484	0.752642	unchanged	-0.70954	0.000319398	unchanged	-0.255982	1	unchanged	-0.13845	0.6484	unchanged	-0.276702	0.265683	unchanged
ENSMUSG00000002949	chr8	4259730	4275913	-	Timm44	translocase of inner mitochondrial membrane 44 [Source:MGI Symbol;Acc:MGI:1343262]	protein_coding	68.1552	-0.440181	0.000447836	unchanged	0.20887	0.103694	unchanged	0.139745	0.630309	unchanged	0.292593	0.0536626	unchanged	0.0280198	0.89499	unchanged	-0.0236362	1	unchanged	-0.160606	0.411096	unchanged	-0.143129	0.471297	unchanged
ENSMUSG00000002957	chr7	141562172	141633011	+	Ap2a2	adaptor-related protein complex 2, alpha 2 subunit [Source:MGI Symbol;Acc:MGI:101920]	protein_coding	209.717	-1.36335	2.30642e-24	Down	-0.957173	7.93623e-13	unchanged	-0.0838589	0.869388	unchanged	0.66941	8.75696e-06	unchanged	1.69399	2.62e-36	Up	0.119562	1	unchanged	0.405202	0.0252384	unchanged	0.0541852	0.842854	unchanged
ENSMUSG00000002963	chr7	44857138	44862992	+	Pnkp	polynucleotide kinase 3'- phosphatase [Source:MGI Symbol;Acc:MGI:1891698]	protein_coding	33.6287	-0.747088	8.01445e-05	unchanged	0.292972	0.125198	unchanged	-0.180718	0.705292	unchanged	-0.150108	0.650187	unchanged	-0.623385	0.00274413	unchanged	-0.252783	1	unchanged	-0.718994	0.0014603	unchanged	-0.40969	0.0848432	unchanged
ENSMUSG00000002968	chr7	44876764	44892712	-	Med25	mediator complex subunit 25 [Source:MGI Symbol;Acc:MGI:1922863]	protein_coding	110.504	-0.420803	0.00194976	unchanged	1.0432	7.54018e-18	Up	0.195752	0.485307	unchanged	0.113366	0.588398	unchanged	0.326276	0.0241984	unchanged	-0.148456	1	unchanged	-0.19641	0.293887	unchanged	0.284364	0.0811969	unchanged
ENSMUSG00000002980	chr7	19756130	19771016	-	Bcam	basal cell adhesion molecule [Source:MGI Symbol;Acc:MGI:1929940]	protein_coding	7.51106	-0.273565	0.867323	unchanged	1.89294	0.0607072	unchanged	-0.355445	0.943145	unchanged	0.776362	0.664767	unchanged	0.73246	0.599961	unchanged	1.20594	1	unchanged	-0.223933	0.892462	unchanged	0.928879	0.611277	unchanged
ENSMUSG00000002981	chr7	19631570	19665033	-	Clptm1	cleft lip and palate associated transmembrane protein 1 [Source:MGI Symbol;Acc:MGI:1927155]	protein_coding	131.971	-0.23663	0.0704151	unchanged	0.66127	9.73296e-09	unchanged	-0.037003	0.943145	unchanged	0.225452	0.140038	unchanged	0.0528147	0.771401	unchanged	0.0608802	1	unchanged	0.0621472	0.787794	unchanged	-0.00413293	0.987068	unchanged
ENSMUSG00000002983	chr7	19606216	19629438	-	Relb	avian reticuloendotheliosis viral (v-rel) oncogene related B [Source:MGI Symbol;Acc:MGI:103289]	protein_coding	9.23778	-0.897897	0.126959	unchanged	0.748261	0.123176	unchanged	1.08776	0.143761	unchanged	1.56954	0.00731069	Up	-0.873938	0.139399	unchanged	-0.475549	1	unchanged	-0.599786	0.408036	unchanged	-0.760421	0.233926	unchanged
ENSMUSG00000002984	chr7	19701312	19715438	-	Tomm40	translocase of outer mitochondrial membrane 40 [Source:MGI Symbol;Acc:MGI:1858259]	protein_coding	205.737	-1.11115	1.17723e-26	Down	-0.441194	1.9813e-05	unchanged	-0.126706	0.622758	unchanged	-0.229775	0.112115	unchanged	0.303695	0.0150765	unchanged	-0.0367352	1	unchanged	-0.00945132	0.972407	unchanged	0.00225343	0.993562	unchanged
ENSMUSG00000002985	chr7	19696108	19699188	-	Apoe	apolipoprotein E [Source:MGI Symbol;Acc:MGI:88057]	protein_coding	210.183	2.98557	9.3036e-20	Up	5.19632	2.79858e-50	Up	-0.108522	0.943145	unchanged	-1.68501	1.01715e-06	Down	-0.420138	0.299632	unchanged	0.566559	1	unchanged	0.347266	0.524138	unchanged	0.535995	0.220812	unchanged
ENSMUSG00000002996	chr12	31926253	31950535	-	Hbp1	high mobility group box transcription factor 1 [Source:MGI Symbol;Acc:MGI:894659]	protein_coding	36.2211	-1.1954	4.65134e-07	Down	-0.753632	0.00205231	unchanged	-0.350549	0.487494	unchanged	0.270544	0.45394	unchanged	-0.123875	0.756734	unchanged	0.151064	1	unchanged	0.0894928	0.864733	unchanged	-0.207264	0.626061	unchanged
ENSMUSG00000002997	chr12	31958475	32061296	-	Prkar2b	protein kinase, cAMP dependent regulatory, type II beta [Source:MGI Symbol;Acc:MGI:97760]	protein_coding	3.80489	3.19074	0.0023475	Up	3.76062	0.000121957	Up	0.00522893	1	unchanged	1.06142	0.256275	unchanged	0.176123	0.859724	unchanged	-0.316994	1	unchanged	0.676576	0.524138	unchanged	-0.245179	0.842539	unchanged
ENSMUSG00000003031	chr6	134920400	134925513	+	Cdkn1b	cyclin-dependent kinase inhibitor 1B [Source:MGI Symbol;Acc:MGI:104565]	protein_coding	3.37327	3.80139	1.14092e-05	Up	4.87914	6.78657e-09	Up	0.676832	0.869673	unchanged	-0.367323	0.615506	unchanged	-1.16305	0.0446751	Down	1.12071	1	unchanged	-0.668364	0.36299	unchanged	-0.475303	0.576052	unchanged
ENSMUSG00000003032	chr4	55527142	55532466	-	Klf4	Kruppel-like factor 4 (gut) [Source:MGI Symbol;Acc:MGI:1342287]	protein_coding	272.184	1.4238	2.68863e-08	Up	0.609815	0.0265995	unchanged	-0.258967	0.72586	unchanged	-1.24701	5.77707e-06	Down	-2.59808	2.1e-23	Down	-0.0618147	1	unchanged	0.47645	0.214628	unchanged	-0.787083	0.0113538	unchanged
ENSMUSG00000003033	chr8	72240017	72257385	+	Ap1m1	adaptor-related protein complex AP-1, mu subunit 1 [Source:MGI Symbol;Acc:MGI:102776]	protein_coding	26.7357	0.149903	0.635872	unchanged	1.57069	2.22488e-13	Up	-0.0760771	0.943145	unchanged	-0.242843	0.514258	unchanged	-0.850143	0.000154929	unchanged	0.0748688	1	unchanged	-0.147455	0.69364	unchanged	-0.130716	0.709927	unchanged
ENSMUSG00000003037	chr8	72161199	72183904	+	Rab8a	RAB8A, member RAS oncogene family [Source:MGI Symbol;Acc:MGI:96960]	protein_coding	51.4511	-0.479661	0.00300685	unchanged	-0.327675	0.053363	unchanged	0.15629	0.697524	unchanged	0.758784	3.7428e-06	unchanged	0.648481	0.000202671	unchanged	0.0313796	1	unchanged	0.370458	0.0955812	unchanged	0.381569	0.0517373	unchanged
ENSMUSG00000003038	chr4	133964737	133968650	-	Hmgn2	high mobility group nucleosomal binding domain 2 [Source:MGI Symbol;Acc:MGI:96136]	protein_coding	71.3377	-0.741132	7.94111e-05	unchanged	0.0433448	0.867897	unchanged	0.12175	0.846454	unchanged	-0.0498736	0.898137	unchanged	-0.404498	0.066952	unchanged	-0.230241	1	unchanged	0.364059	0.147437	unchanged	0.164874	0.559333	unchanged
ENSMUSG00000003039	chr8	72219729	72224418	+	Fam32a	family with sequence similarity 32, member A [Source:MGI Symbol;Acc:MGI:1915172]	protein_coding	67.1328	-0.739743	1.98267e-08	unchanged	-0.596376	2.88073e-06	unchanged	0.329914	0.0842156	unchanged	0.312529	0.0633379	unchanged	-0.0164282	0.953054	unchanged	-0.124391	1	unchanged	-0.00195399	0.996763	unchanged	-0.0884601	0.713024	unchanged
ENSMUSG00000003051	chr1	135253574	135258568	-	Elf3	E74-like factor 3 [Source:MGI Symbol;Acc:MGI:1101781]	protein_coding	206.096	0.690119	0.0692968	unchanged	-0.210501	0.630744	unchanged	-0.227202	0.863421	unchanged	0.833151	0.0436814	unchanged	1.4084	0.000109863	Up	0.367921	1	unchanged	0.803006	0.0893846	unchanged	0.950291	0.0246609	unchanged
ENSMUSG00000003062	chr13	19357675	19395795	-	Stard3nl	STARD3 N-terminal like [Source:MGI Symbol;Acc:MGI:1923455]	protein_coding	31.1383	0.556416	0.0635528	unchanged	0.922157	0.000249273	unchanged	-0.104637	0.931209	unchanged	-0.507854	0.149563	unchanged	0.353732	0.250964	unchanged	-0.317514	1	unchanged	0.0424911	0.942486	unchanged	0.0396421	0.943575	unchanged
ENSMUSG00000003068	chr10	80115802	80130682	+	Stk11	serine/threonine kinase 11 [Source:MGI Symbol;Acc:MGI:1341870]	protein_coding	58.3435	-0.407274	0.0132754	unchanged	0.395819	0.0136445	unchanged	0.265673	0.371528	unchanged	0.261552	0.205946	unchanged	0.352611	0.0657006	unchanged	0.0857288	1	unchanged	0.0197416	0.958229	unchanged	0.228433	0.292522	unchanged
ENSMUSG00000003070	chr10	80179481	80190010	+	Efna2	ephrin A2 [Source:MGI Symbol;Acc:MGI:102707]	protein_coding	16.8428	-0.384416	0.238583	unchanged	-0.271533	0.38087	unchanged	0.0286528	0.984952	unchanged	0.110803	0.840889	unchanged	0.149196	0.747059	unchanged	-0.438937	1	unchanged	-0.245203	0.626175	unchanged	0.240538	0.614672	unchanged
ENSMUSG00000003072	chr10	80138631	80145818	+	Atp5d	ATP synthase, H+ transporting, mitochondrial F1 complex, delta subunit [Source:MGI Symbol;Acc:MGI:1913293]	protein_coding	417.411	-0.235156	0.0334386	unchanged	0.927749	8.82855e-21	unchanged	0.160804	0.474491	unchanged	0.180001	0.176104	unchanged	0.479019	8.68e-06	unchanged	0.0604019	1	unchanged	0.0666019	0.736472	unchanged	0.330863	0.00603994	unchanged
ENSMUSG00000003099	chr7	17004639	17027924	-	Ppp5c	protein phosphatase 5, catalytic subunit [Source:MGI Symbol;Acc:MGI:102666]	protein_coding	116.171	-0.637531	3.12934e-05	unchanged	0.217674	0.200113	unchanged	0.022651	0.974697	unchanged	0.0602201	0.837755	unchanged	0.327268	0.0696944	unchanged	-0.100922	1	unchanged	0.0788188	0.796599	unchanged	0.00877259	0.979394	unchanged
ENSMUSG00000003119	chr11	98203058	98278504	+	Cdk12	cyclin-dependent kinase 12 [Source:MGI Symbol;Acc:MGI:1098802]	protein_coding	18.173	1.17308	2.36194e-07	Up	0.514701	0.0462309	unchanged	-0.0336453	0.977215	unchanged	-0.100447	0.781984	unchanged	-0.340133	0.284974	unchanged	-0.039518	1	unchanged	0.13303	0.776888	unchanged	0.0652213	0.899394	unchanged
ENSMUSG00000003123	chr7	25379526	25398710	-	Lipe	lipase, hormone sensitive [Source:MGI Symbol;Acc:MGI:96790]	protein_coding	1.43603	1.24746	0.23861	unchanged	-0.401187	0.706026	unchanged	1.00334	NA	unchanged	-0.431957	0.758742	unchanged	-0.646698	0.619577	unchanged	-0.389536	1	unchanged	-0.571696	0.76754	unchanged	-0.314098	0.832887	unchanged
ENSMUSG00000003131	chr9	45962858	46012690	-	Pafah1b2	platelet-activating factor acetylhydrolase, isoform 1b, subunit 2 [Source:MGI Symbol;Acc:MGI:108415]	protein_coding	47.6106	-1.15316	5.07336e-14	Down	-1.50533	4.42822e-25	Down	0.161813	0.648533	unchanged	0.49758	0.00901878	unchanged	0.194656	0.423143	unchanged	-0.0919362	1	unchanged	0.253865	0.334395	unchanged	0.271075	0.252307	unchanged
ENSMUSG00000003134	chr1	39371491	39478755	-	Tbc1d8	TBC1 domain family, member 8 [Source:MGI Symbol;Acc:MGI:1927225]	protein_coding	5.01824	0.5576	0.433114	unchanged	-0.334503	0.633327	unchanged	0.0768178	0.979453	unchanged	1.02755	0.102855	unchanged	1.11953	0.027702	Up	-0.954084	1	unchanged	0.035942	0.979108	unchanged	-0.407261	0.709249	unchanged
ENSMUSG00000003135	chr1	39534991	39546889	+	Cnot11	CCR4-NOT transcription complex, subunit 11 [Source:MGI Symbol;Acc:MGI:106580]	protein_coding	57.5496	0.41641	0.00672295	unchanged	-0.569797	4.62786e-05	unchanged	0.149557	0.720486	unchanged	-0.295654	0.105656	unchanged	-0.584835	0.000553372	unchanged	-0.213202	1	unchanged	-0.461899	0.0201683	unchanged	-0.244407	0.281557	unchanged
ENSMUSG00000003153	chr6	122727808	122801640	-	Slc2a3	solute carrier family 2 (facilitated glucose transporter), member 3 [Source:MGI Symbol;Acc:MGI:95757]	protein_coding	453.363	-0.017934	0.972628	unchanged	-0.794651	0.0262197	unchanged	0.167469	0.897883	unchanged	2.02057	5.35298e-09	Up	2.12611	3.15e-10	Up	0.448722	1	unchanged	1.81667	1.26552e-06	Up	2.04778	6.93957e-09	Up
ENSMUSG00000003154	chr6	122819913	122845366	+	Foxj2	forkhead box J2 [Source:MGI Symbol;Acc:MGI:1926805]	protein_coding	2.0899	0.0322687	0.975064	unchanged	0.450796	0.609998	unchanged	-2.43159	0.118498	unchanged	-1.52965	0.14193	unchanged	-0.733289	0.412456	unchanged	-0.638597	1	unchanged	-0.563445	0.688254	unchanged	1.56453	0.136806	unchanged
ENSMUSG00000003161	chr5	8046077	8069379	+	Sri	sorcin [Source:MGI Symbol;Acc:MGI:98419]	protein_coding	29.6163	1.3929	2.4761e-05	Up	1.05047	0.00186181	Up	-0.454901	0.611633	unchanged	-0.0596493	0.920696	unchanged	1.33843	2.09e-05	Up	-0.0489304	1	unchanged	0.72454	0.08563	unchanged	0.463245	0.268884	unchanged
ENSMUSG00000003166	chr16	17839481	17898562	-	Dgcr2	DiGeorge syndrome critical region gene 2 [Source:MGI Symbol;Acc:MGI:892866]	protein_coding	33.0185	0.0582084	0.837415	unchanged	0.730216	0.000114896	unchanged	-0.266467	0.588476	unchanged	-0.260197	0.355519	unchanged	-0.450091	0.0455099	unchanged	-0.106544	1	unchanged	-0.169792	0.609229	unchanged	-0.612508	0.00452887	unchanged
ENSMUSG00000003184	chr7	44997647	45002848	+	Irf3	interferon regulatory factor 3 [Source:MGI Symbol;Acc:MGI:1859179]	protein_coding	22.7464	-0.429334	0.0726673	unchanged	0.789315	0.000120473	unchanged	-0.434409	0.283873	unchanged	0.10655	0.792037	unchanged	-0.794019	0.000882612	unchanged	0.0237258	1	unchanged	-0.53785	0.0482663	unchanged	0.236595	0.422097	unchanged
ENSMUSG00000003190	chr7	44991221	44998712	-	Bcl2l12	BCL2-like 12 (proline rich) [Source:MGI Symbol;Acc:MGI:1922986]	protein_coding	7.05048	1.08712	0.0134703	Up	1.9497	9.07802e-07	Up	-0.241208	0.898471	unchanged	-0.781787	0.123309	unchanged	-1.62703	1.27e-05	Down	0.114286	1	unchanged	-0.319323	0.571191	unchanged	-0.660359	0.116434	unchanged
ENSMUSG00000003198	chr17	55892092	55898928	+	Zfp959	zinc finger protein 959 [Source:MGI Symbol;Acc:MGI:2385058]	protein_coding	3.64267	-0.0774303	0.907698	unchanged	0.789315	0.223108	unchanged	0.230544	0.88399	unchanged	-0.0808763	0.930016	unchanged	-0.493954	0.503153	unchanged	0.665344	1	unchanged	-0.365532	0.740262	unchanged	-0.521071	0.6084	unchanged
ENSMUSG00000003199	chr17	56005710	56016790	+	Mpnd	MPN domain containing [Source:MGI Symbol;Acc:MGI:1915297]	protein_coding	10.2064	1.35559	0.0194403	Up	3.30805	4.82219e-11	Up	-0.436825	0.86314	unchanged	-1.02598	0.120879	unchanged	-1.95405	1.21e-06	Down	-0.943888	1	unchanged	-0.142339	0.838591	unchanged	-0.699531	0.101189	unchanged
ENSMUSG00000003200	chr17	56016749	56036635	-	Sh3gl1	SH3-domain GRB2-like 1 [Source:MGI Symbol;Acc:MGI:700010]	protein_coding	112.686	-0.144646	0.224275	unchanged	0.599292	2.55401e-09	unchanged	-0.0224813	0.960353	unchanged	-0.350108	0.00491686	unchanged	0.0829313	0.607699	unchanged	-0.0508028	1	unchanged	-0.0684154	0.726661	unchanged	-0.145838	0.31751	unchanged
ENSMUSG00000003206	chr17	55952639	55957022	+	Ebi3	Epstein-Barr virus induced gene 3 [Source:MGI Symbol;Acc:MGI:1354171]	protein_coding	0.258688	-0.634238	NA	unchanged	0.214853	NA	unchanged	0.00522892	NA	unchanged	0.419348	NA	unchanged	1.71829	NA	unchanged	0.0436796	1	unchanged	-0.26062	NA	unchanged	-0.14994	NA	unchanged
ENSMUSG00000003208	chr17	55959098	55968285	+	Yju2	YJU2 splicing factor [Source:MGI Symbol;Acc:MGI:1920136]	protein_coding	12.6565	-0.488287	0.0916237	unchanged	-0.28874	0.34233	unchanged	0.471503	0.283574	unchanged	0.24584	0.555279	unchanged	0.0828565	0.871276	unchanged	0.0115603	1	unchanged	-0.358354	0.459524	unchanged	-0.203293	0.689255	unchanged
ENSMUSG00000003226	chr10	58446919	58494356	+	Ranbp2	RAN binding protein 2 [Source:MGI Symbol;Acc:MGI:894323]	protein_coding	45.2601	0.611552	0.000256947	unchanged	-0.30863	0.0806303	unchanged	-0.110875	0.863421	unchanged	-0.0239271	0.944495	unchanged	0.123478	0.671675	unchanged	-0.0301472	1	unchanged	0.0527676	0.886202	unchanged	0.0176595	0.965188	unchanged
ENSMUSG00000003228	chr19	60889748	61095968	+	Grk5	G protein-coupled receptor kinase 5 [Source:MGI Symbol;Acc:MGI:109161]	protein_coding	24.1377	-1.55192	9.6637e-09	Down	-2.01719	1.6035e-14	Down	-0.0181635	0.995068	unchanged	0.833758	0.0103517	unchanged	1.88792	3.46e-07	Up	-0.05693	1	unchanged	0.961426	0.00615923	unchanged	0.66143	0.0997764	unchanged
ENSMUSG00000003233	chr16	20516981	20534010	+	Dvl3	dishevelled segment polarity protein 3 [Source:MGI Symbol;Acc:MGI:108100]	protein_coding	40.1816	-1.14434	4.50445e-11	Down	-0.0351554	0.893176	unchanged	0.0998068	0.864515	unchanged	0.0908434	0.791251	unchanged	0.120825	0.622587	unchanged	-0.00338295	1	unchanged	0.243607	0.378428	unchanged	0.251562	0.297284	unchanged
ENSMUSG00000003234	chr16	20548576	20561379	+	Abcf3	ATP-binding cassette, sub-family F (GCN20), member 3 [Source:MGI Symbol;Acc:MGI:1351656]	protein_coding	56.8151	0.366152	0.0692072	unchanged	0.462722	0.0212944	unchanged	0.116478	0.869673	unchanged	0.250927	0.307281	unchanged	-0.052894	0.872333	unchanged	0.0933573	1	unchanged	0.0981801	0.796794	unchanged	0.65176	0.00298636	unchanged
ENSMUSG00000003235	chr16	20498816	20509323	+	Eif2b5	eukaryotic translation initiation factor 2B, subunit 5 epsilon [Source:MGI Symbol;Acc:MGI:2446176]	protein_coding	76.3336	-0.448638	0.00587817	unchanged	-0.416084	0.010989	unchanged	0.157325	0.704101	unchanged	-0.499231	0.00883595	unchanged	-0.44237	0.0210658	unchanged	0.160865	1	unchanged	-0.118623	0.707701	unchanged	-0.045764	0.892844	unchanged
ENSMUSG00000003269	chr7	45806636	45814581	-	Cyth2	cytohesin 2 [Source:MGI Symbol;Acc:MGI:1334255]	protein_coding	72.4119	-0.48776	0.000870389	unchanged	-0.921673	2.36459e-11	unchanged	0.239254	0.386357	unchanged	0.451363	0.00581917	unchanged	0.479368	0.00483851	unchanged	-0.0590279	1	unchanged	-0.132736	0.638537	unchanged	-0.0830018	0.76365	unchanged
ENSMUSG00000003271	chr7	45729982	45784669	-	Sult2b1	sulfotransferase family, cytosolic, 2B, member 1 [Source:MGI Symbol;Acc:MGI:1926342]	protein_coding	7.02384	-2.89372	1.22893e-10	Down	-1.1614	0.00414302	Down	-0.438035	0.609455	unchanged	-0.323154	0.746264	unchanged	-0.557431	0.538483	unchanged	0.150917	1	unchanged	-0.769843	0.290341	unchanged	-1.95864	0.0114736	Down
ENSMUSG00000003273	chr7	45699842	45704682	+	Car11	carbonic anhydrase 11 [Source:MGI Symbol;Acc:MGI:1336193]	protein_coding	0.658298	0	1	unchanged	2.33342	0.158875	unchanged	0.365902	NA	unchanged	0	1	unchanged	-1.17847	0.600799	unchanged	-0.316994	1	unchanged	0.641501	NA	unchanged	-1.94188	NA	unchanged
ENSMUSG00000003279	chr17	69969072	70821413	+	Dlgap1	DLG associated protein 1 [Source:MGI Symbol;Acc:MGI:1346065]	protein_coding	0.739992	2.48624	0.0426646	Up	1.29687	0.395261	unchanged	0.365902	NA	unchanged	-1.24389	0.443709	unchanged	-2.46389	0.0532943	unchanged	1.50167	1	unchanged	0.100054	NA	unchanged	-2.29238	NA	unchanged
ENSMUSG00000003282	chr4	3900995	3938423	-	Plag1	pleiomorphic adenoma gene 1 [Source:MGI Symbol;Acc:MGI:1891916]	protein_coding	0.914785	2.10248	0.0528443	unchanged	0.575907	0.6545	unchanged	-0.320137	NA	unchanged	-0.578201	0.672854	unchanged	-0.518458	0.748204	unchanged	-0.766874	1	unchanged	0.0772023	NA	unchanged	0.980301	0.608789	unchanged
ENSMUSG00000003283	chr2	153108467	153151441	+	Hck	hemopoietic cell kinase [Source:MGI Symbol;Acc:MGI:96052]	protein_coding	0.196614	0.447781	NA	unchanged	-1.19421	NA	unchanged	0	NA	unchanged	-0.301998	NA	unchanged	-0.423506	NA	unchanged	0.482603	1	unchanged	-0.260619	NA	unchanged	0	NA	unchanged
ENSMUSG00000003299	chr9	21002737	21008839	+	Mrpl4	mitochondrial ribosomal protein L4 [Source:MGI Symbol;Acc:MGI:2137210]	protein_coding	117.168	-0.913092	1.1531e-15	unchanged	0.387955	0.00137163	unchanged	0.171682	0.479881	unchanged	0.139047	0.430781	unchanged	-0.0751492	0.692719	unchanged	0.0354135	1	unchanged	-0.296196	0.0687142	unchanged	-0.167261	0.357915	unchanged
ENSMUSG00000003308	chr9	21229729	21239361	-	Keap1	kelch-like ECH-associated protein 1 [Source:MGI Symbol;Acc:MGI:1858732]	protein_coding	25.6307	0.418449	0.0587307	unchanged	0.191821	0.439338	unchanged	0.0901957	0.917588	unchanged	0.183904	0.535951	unchanged	0.528685	0.0326575	unchanged	-0.441562	1	unchanged	-0.230757	0.532379	unchanged	0.0916677	0.820667	unchanged
ENSMUSG00000003309	chr9	21294274	21312337	-	Ap1m2	adaptor protein complex AP-1, mu 2 subunit [Source:MGI Symbol;Acc:MGI:1336974]	protein_coding	49.6193	-0.28423	0.170268	unchanged	0.542035	0.00373152	unchanged	0.0832359	0.909761	unchanged	0.126954	0.678233	unchanged	0.509437	0.0156201	unchanged	0.0935634	1	unchanged	0.0184645	0.967767	unchanged	0.298618	0.242577	unchanged
ENSMUSG00000003316	chr8	111154420	111259216	-	Glg1	golgi apparatus protein 1 [Source:MGI Symbol;Acc:MGI:104967]	protein_coding	55.4827	2.67502	2.98452e-47	Up	1.15043	7.48509e-10	Up	0.0911781	0.920652	unchanged	-0.38312	0.0557016	unchanged	-0.232645	0.351586	unchanged	0.0139098	1	unchanged	-0.144049	0.673415	unchanged	-0.0809739	0.816497	unchanged
ENSMUSG00000003341	chr10	80519583	80539124	-	Atp8b3	ATPase, class I, type 8B, member 3 [Source:MGI Symbol;Acc:MGI:1914581]	protein_coding	0.141641	0	NA	unchanged	0	NA	unchanged	0.365899	NA	unchanged	0	NA	unchanged	0	NA	unchanged	0	1	unchanged	0.460723	NA	unchanged	-0.149939	NA	unchanged
ENSMUSG00000003344	chr10	80642616	80657071	-	Btbd2	BTB (POZ) domain containing 2 [Source:MGI Symbol;Acc:MGI:1933831]	protein_coding	39.2154	2.85704	1.26372e-16	Up	5.22085	1.73079e-30	Up	-0.217208	0.906626	unchanged	-0.350647	0.292776	unchanged	-0.691473	0.00359148	unchanged	0.346703	1	unchanged	-0.336851	0.318075	unchanged	-0.00973974	0.981785	unchanged
ENSMUSG00000003345	chr10	80622837	80640749	+	Csnk1g2	casein kinase 1, gamma 2 [Source:MGI Symbol;Acc:MGI:1920014]	protein_coding	75.0081	-0.498816	0.00219437	unchanged	0.32151	0.0391097	unchanged	0.0269466	0.968993	unchanged	0.410586	0.0293583	unchanged	0.244563	0.19248	unchanged	-0.162341	1	unchanged	0.0253374	0.943157	unchanged	-0.0445853	0.886468	unchanged
ENSMUSG00000003346	chr10	80583653	80590341	-	Abhd17a	abhydrolase domain containing 17A [Source:MGI Symbol;Acc:MGI:106388]	protein_coding	164.012	-1.0744	9.82108e-16	Down	0.448893	0.000776474	unchanged	0.11713	0.76432	unchanged	0.324556	0.05854	unchanged	0.806731	4.26e-09	unchanged	-0.0640092	1	unchanged	0.244373	0.200159	unchanged	0.282051	0.10616	unchanged
ENSMUSG00000003348	chr10	80685252	80701977	-	Mob3a	MOB kinase activator 3A [Source:MGI Symbol;Acc:MGI:3050117]	protein_coding	3.61688	0.863883	0.283126	unchanged	1.84204	0.00197774	Up	0.491817	0.845612	unchanged	0.218923	0.849236	unchanged	1.12348	0.089918	unchanged	-0.0826468	1	unchanged	0.273699	0.759148	unchanged	0.0507861	0.956461	unchanged
ENSMUSG00000003352	chr15	98630839	98644529	+	Cacnb3	calcium channel, voltage-dependent, beta 3 subunit [Source:MGI Symbol;Acc:MGI:103307]	protein_coding	28.7586	-1.32851	1.56138e-06	Down	0.472981	0.104296	unchanged	0.35542	0.558394	unchanged	-0.260565	0.577048	unchanged	1.24953	3.68e-05	Up	0.0520484	1	unchanged	-0.346989	0.429848	unchanged	-0.031416	0.957103	unchanged
ENSMUSG00000003354	chr15	98708206	98723336	+	Ccdc65	coiled-coil domain containing 65 [Source:MGI Symbol;Acc:MGI:2146001]	protein_coding	1.99989	-1.32859	0.0751492	unchanged	-2.71405	0.00310777	Down	1.08759	0.250284	unchanged	1.72496	0.0295693	Up	0.625497	0.573628	unchanged	-0.227057	1	unchanged	0.417761	0.854433	unchanged	0.69576	0.684563	unchanged
ENSMUSG00000003355	chr15	98724365	98728198	-	Fkbp11	FK506 binding protein 11 [Source:MGI Symbol;Acc:MGI:1913370]	protein_coding	29.7649	-0.825371	0.073569	unchanged	-0.904259	0.0404688	unchanged	0.148103	0.932251	unchanged	0.811118	0.126843	unchanged	0.627311	0.288719	unchanged	0.197956	1	unchanged	0.0711346	0.943769	unchanged	0.52565	0.406706	unchanged
ENSMUSG00000003360	chr15	98645133	98662894	-	Ddx23	DEAD (Asp-Glu-Ala-Asp) box polypeptide 23 [Source:MGI Symbol;Acc:MGI:1921601]	protein_coding	1.84135	2.50579	0.00152449	Up	0.0112058	0.996641	unchanged	1.51495	0.333806	unchanged	-0.64653	0.412377	unchanged	-0.652147	0.54976	unchanged	-0.156568	1	unchanged	-0.280401	0.85386	unchanged	0.027148	0.985127	unchanged
ENSMUSG00000003363	chr7	27531999	27553218	-	Pld3	phospholipase D family, member 3 [Source:MGI Symbol;Acc:MGI:1333782]	protein_coding	52.5573	0.375579	0.15174	unchanged	0.380172	0.149853	unchanged	0.271311	0.653134	unchanged	0.79446	0.00167013	unchanged	1.91913	7.97e-15	Up	0.00916092	1	unchanged	0.278321	0.482245	unchanged	0.777315	0.00632289	unchanged
ENSMUSG00000003378	chr7	25009848	25072346	-	Grik5	glutamate receptor, ionotropic, kainate 5 (gamma 2) [Source:MGI Symbol;Acc:MGI:95818]	protein_coding	4.13548	0.463182	0.567443	unchanged	3.94313	2.20753e-06	Up	-0.403348	0.880465	unchanged	0.357936	0.712475	unchanged	-0.462186	0.477859	unchanged	0.367983	1	unchanged	0.169718	0.841251	unchanged	-0.192026	0.81841	unchanged
ENSMUSG00000003379	chr7	24897380	24902197	+	Cd79a	CD79A antigen (immunoglobulin-associated alpha) [Source:MGI Symbol;Acc:MGI:101774]	protein_coding	0.863002	-0.95567	0.528966	unchanged	0.214853	0.913239	unchanged	-1.03755	NA	unchanged	1.91118	0.185777	unchanged	0.29784	0.88637	unchanged	-0.316994	1	unchanged	0.755524	NA	unchanged	-0.14994	0.956198	unchanged
ENSMUSG00000003380	chr7	24969751	24972754	-	Rabac1	Rab acceptor 1 (prenylated) [Source:MGI Symbol;Acc:MGI:1201692]	protein_coding	150.141	-0.298289	0.0478122	unchanged	0.53659	7.8708e-05	unchanged	-0.224733	0.451862	unchanged	0.0398917	0.888162	unchanged	0.262933	0.103141	unchanged	0.150401	1	unchanged	0.349408	0.0461551	unchanged	0.261773	0.14339	unchanged
ENSMUSG00000003382	chr3	87525406	87540156	+	Etv3	ets variant 3 [Source:MGI Symbol;Acc:MGI:1350926]	protein_coding	23.9819	0.0897847	0.823807	unchanged	0.199764	0.561272	unchanged	-0.118203	0.921493	unchanged	0.0341398	0.960441	unchanged	0.758167	0.011674	unchanged	0.281616	1	unchanged	0.793683	0.0213895	unchanged	0.119137	0.82232	unchanged
ENSMUSG00000003402	chr9	22002805	22014222	+	Prkcsh	protein kinase C substrate 80K-H [Source:MGI Symbol;Acc:MGI:107877]	protein_coding	75.763	0.446387	0.00858557	unchanged	1.01552	2.58272e-10	Up	-0.00940551	0.999864	unchanged	0.0858989	0.752642	unchanged	-0.226844	0.262517	unchanged	0.059948	1	unchanged	-0.00252752	0.996399	unchanged	-0.150258	0.545823	unchanged
ENSMUSG00000003410	chr9	22015004	22052023	-	Elavl3	ELAV like RNA binding protein 3 [Source:MGI Symbol;Acc:MGI:109157]	protein_coding	4.60756	-2.54701	0.000218531	Down	-1.8938	0.000269521	Down	0.790581	0.347151	unchanged	1.61373	0.0622794	unchanged	4.55056	4.82e-07	Up	-0.156419	1	unchanged	2.24266	0.000166026	Up	2.66094	3.98533e-05	Up
ENSMUSG00000003411	chr4	108879062	108943324	+	Rab3b	RAB3B, member RAS oncogene family [Source:MGI Symbol;Acc:MGI:1917158]	protein_coding	3.32891	-0.922331	0.165224	unchanged	-0.453441	0.506056	unchanged	0.15481	0.944324	unchanged	-2.05186	0.0687382	unchanged	-3.01808	0.000604499	Down	-0.476055	1	unchanged	-1.24859	0.247737	unchanged	-2.30607	0.0054617	Down
ENSMUSG00000003418	chr2	13651020	13794064	-	St8sia6	ST8 alpha-N-acetyl-neuraminide alpha-2,8-sialyltransferase 6 [Source:MGI Symbol;Acc:MGI:2386797]	protein_coding	0.534189	-0.651436	0.737656	unchanged	-0.14582	0.949562	unchanged	-0.372642	NA	unchanged	-0.301999	NA	unchanged	0.658514	NA	unchanged	0.404353	1	unchanged	0	NA	unchanged	-0.14994	NA	unchanged
ENSMUSG00000003420	chr7	45092989	45103851	-	Fcgrt	Fc receptor, IgG, alpha chain transporter [Source:MGI Symbol;Acc:MGI:103017]	protein_coding	3.19681	-3.17089	0.00111832	Down	-0.555837	0.479827	unchanged	-0.0533095	0.990136	unchanged	3.47408	0.000868624	Up	1.52813	0.0518287	unchanged	-0.348684	1	unchanged	0.104557	0.950278	unchanged	0.677607	0.5781	unchanged
ENSMUSG00000003421	chr7	45062428	45078210	+	Nosip	nitric oxide synthase interacting protein [Source:MGI Symbol;Acc:MGI:1913644]	protein_coding	86.6394	-0.593937	2.24774e-05	unchanged	-0.102944	0.557314	unchanged	0.174484	0.593586	unchanged	0.384448	0.0196922	unchanged	0.562896	0.000273769	unchanged	0.101591	1	unchanged	0.208395	0.3572	unchanged	0.518708	0.00209346	unchanged
ENSMUSG00000003423	chr7	45154302	45160065	+	Pih1d1	PIH1 domain containing 1 [Source:MGI Symbol;Acc:MGI:1916095]	protein_coding	27.1159	-0.369618	0.101234	unchanged	0.883188	7.23095e-06	unchanged	0.0111638	0.999832	unchanged	-0.166134	0.630744	unchanged	-0.19711	0.496249	unchanged	0.00493679	1	unchanged	-0.0701455	0.857824	unchanged	-0.186095	0.566414	unchanged
ENSMUSG00000003429	chr7	45122378	45124439	-	Rps11	ribosomal protein S11 [Source:MGI Symbol;Acc:MGI:1351329]	protein_coding	1028.16	0.849177	2.41757e-15	unchanged	-0.156338	0.20663	unchanged	0.200645	0.364235	unchanged	-0.0628056	0.735727	unchanged	0.150377	0.276973	unchanged	0.0288382	1	unchanged	-0.0163394	0.951446	unchanged	0.15127	0.34235	unchanged
ENSMUSG00000003435	chr7	28314890	28338746	-	Supt5	suppressor of Ty 5, DSIF elongation factor subunit [Source:MGI Symbol;Acc:MGI:1202400]	protein_coding	132.578	-0.810507	4.28113e-10	unchanged	0.00879141	0.966548	unchanged	0.117097	0.756051	unchanged	0.0702814	0.765621	unchanged	-0.0250827	0.915039	unchanged	-0.144182	1	unchanged	-0.0120019	0.972015	unchanged	0.16644	0.411163	unchanged
ENSMUSG00000003436	chr7	28293552	28302238	-	Dll3	delta like canonical Notch ligand 3 [Source:MGI Symbol;Acc:MGI:1096877]	protein_coding	14.9847	-2.41749	5.33746e-17	Down	-1.72767	1.00226e-10	Down	0.166793	0.822934	unchanged	-0.0328738	0.974744	unchanged	0.595417	0.185327	unchanged	-0.15955	1	unchanged	0.410574	0.400688	unchanged	0.216716	0.711617	unchanged
ENSMUSG00000003437	chr7	28392950	28399388	+	Paf1	Paf1, RNA polymerase II complex component [Source:MGI Symbol;Acc:MGI:1923988]	protein_coding	19.5919	0.485827	0.0168789	unchanged	-1.16722	1.05419e-09	Down	0.00258746	1	unchanged	-0.591135	0.00928751	unchanged	-0.375701	0.283966	unchanged	-0.0176565	1	unchanged	-0.122229	0.78874	unchanged	0.0671485	0.894768	unchanged
ENSMUSG00000003438	chr7	28305515	28312072	-	Timm50	translocase of inner mitochondrial membrane 50 [Source:MGI Symbol;Acc:MGI:1913775]	protein_coding	115.632	-1.30804	6.22511e-29	Down	-0.165221	0.218639	unchanged	0.122658	0.680508	unchanged	0.138329	0.468661	unchanged	0.41254	0.00387565	unchanged	-0.0049291	1	unchanged	-0.14341	0.49009	unchanged	-0.0653501	0.778736	unchanged
ENSMUSG00000003444	chr7	28386145	28392708	-	Med29	mediator complex subunit 29 [Source:MGI Symbol;Acc:MGI:1914474]	protein_coding	64.6122	-1.11775	9.20948e-16	Down	0.390178	0.0089728	unchanged	0.0572831	0.916888	unchanged	-0.14418	0.545673	unchanged	-0.261356	0.176394	unchanged	-0.130171	1	unchanged	-0.392324	0.0436564	unchanged	-0.313603	0.1219	unchanged
ENSMUSG00000003452	chr6	149408885	149563329	+	Bicd1	BICD cargo adaptor 1 [Source:MGI Symbol;Acc:MGI:1101760]	protein_coding	0.520011	-0.634238	0.789936	unchanged	0.9362	0.664014	unchanged	-0.716118	NA	unchanged	0	NA	unchanged	-2.07943	NA	unchanged	0.404353	1	unchanged	0.846399	NA	unchanged	-1.22948	NA	unchanged
ENSMUSG00000003458	chr1	172066012	172082795	-	Ncstn	nicastrin [Source:MGI Symbol;Acc:MGI:1891700]	protein_coding	31.2723	1.02685	6.8864e-07	Up	1.27072	7.26065e-11	Up	0.0360936	0.972845	unchanged	0.206179	0.436186	unchanged	0.47421	0.0267869	unchanged	0.0851479	1	unchanged	0.60191	0.00438559	unchanged	0.444269	0.0476976	unchanged
ENSMUSG00000003464	chr1	172126754	172136493	+	Pex19	peroxisomal biogenesis factor 19 [Source:MGI Symbol;Acc:MGI:1334458]	protein_coding	34.1421	0.331878	0.113416	unchanged	0.759041	1.55598e-05	unchanged	0.0766142	0.924718	unchanged	0.227242	0.372806	unchanged	-0.289534	0.301548	unchanged	-0.31798	1	unchanged	-0.207458	0.473295	unchanged	-0.0267247	0.94693	unchanged
ENSMUSG00000003500	chr6	29200433	29216364	-	Impdh1	inosine monophosphate dehydrogenase 1 [Source:MGI Symbol;Acc:MGI:96567]	protein_coding	125.096	-0.719571	0.00241536	unchanged	0.493279	0.0444558	unchanged	-0.127702	0.881385	unchanged	0.11665	0.770671	unchanged	1.35325	7.51e-09	Up	-0.207117	1	unchanged	-0.667184	0.0262861	unchanged	0.535942	0.068591	unchanged
ENSMUSG00000003518	chr11	101971142	101987013	-	Dusp3	dual specificity phosphatase 3 (vaccinia virus phosphatase VH1-related) [Source:MGI Symbol;Acc:MGI:1919599]	protein_coding	9.06969	-1.32686	0.000894936	Down	-1.41888	0.0011623	Down	-0.454602	0.60262	unchanged	0.90545	0.0620984	unchanged	2.09742	1.74e-06	Up	0.8459	1	unchanged	0.318291	0.731327	unchanged	1.04736	0.0708451	unchanged
ENSMUSG00000003526	chr16	18060356	18090203	-	Prodh	proline dehydrogenase [Source:MGI Symbol;Acc:MGI:97770]	protein_coding	9.37485	-1.67905	5.42464e-08	Down	-0.298538	0.390561	unchanged	-0.199162	0.807385	unchanged	-0.366015	0.533172	unchanged	-0.0778176	0.898326	unchanged	-0.233287	1	unchanged	-0.305252	0.605039	unchanged	-1.08086	0.0119681	Down
ENSMUSG00000003527	chr16	17900708	17911348	-	Ess2	ess-2 splicing factor [Source:MGI Symbol;Acc:MGI:107854]	protein_coding	18.0914	-0.290777	0.288748	unchanged	0.3097	0.24129	unchanged	0.246131	0.675653	unchanged	0.183203	0.62935	unchanged	0.314721	0.35423	unchanged	0.275351	1	unchanged	-0.404688	0.273481	unchanged	0.27946	0.432533	unchanged
ENSMUSG00000003528	chr16	17925222	17928219	-	Slc25a1	solute carrier family 25 (mitochondrial carrier, citrate transporter), member 1 [Source:MGI Symbol;Acc:MGI:1345283]	protein_coding	11.1414	2.60846	0.000115487	Up	3.50785	3.4803e-12	Up	-0.0168596	1	unchanged	-0.290684	0.703913	unchanged	-0.286785	0.635725	unchanged	0.509833	1	unchanged	-0.529304	0.359495	unchanged	-1.29966	0.00499135	Down
ENSMUSG00000003531	chr16	18052859	18071632	+	Dgcr6	DiGeorge syndrome critical region gene 6 [Source:MGI Symbol;Acc:MGI:1202877]	protein_coding	25.2916	-0.391957	0.0871813	unchanged	0.738506	0.000135055	unchanged	-0.122252	0.872243	unchanged	-0.0259757	0.962024	unchanged	0.0410236	0.905618	unchanged	0.0673885	1	unchanged	-0.328841	0.250971	unchanged	-0.321138	0.26934	unchanged
ENSMUSG00000003534	chr17	35681566	35704621	-	Ddr1	discoidin domain receptor family, member 1 [Source:MGI Symbol;Acc:MGI:99216]	protein_coding	11.666	-1.38315	2.92924e-05	Down	-2.59273	1.08884e-12	Down	0.341794	0.61719	unchanged	0.913123	0.0222107	unchanged	0.946856	0.0882157	unchanged	0.101411	1	unchanged	-0.503256	0.572549	unchanged	0.0578655	0.956198	unchanged
ENSMUSG00000003541	chr17	35821683	35822923	+	Ier3	immediate early response 3 [Source:MGI Symbol;Acc:MGI:104814]	protein_coding	8.16751	0.286705	0.797752	unchanged	0.00771938	1	unchanged	-0.343403	0.919068	unchanged	2.11731	0.0124191	Up	2.74716	0.000657554	Up	-0.572157	1	unchanged	2.04237	0.0259744	Up	2.11124	0.0155092	Up
ENSMUSG00000003545	chr7	19302695	19310051	-	Fosb	FBJ osteosarcoma oncogene B [Source:MGI Symbol;Acc:MGI:95575]	protein_coding	2.51011	0.0871085	0.969091	unchanged	2.07724	0.137005	unchanged	-0.716118	0.897883	unchanged	-0.301999	0.912489	unchanged	0.653318	0.749382	unchanged	-1.01576	1	unchanged	0.0741707	0.977952	unchanged	-0.865296	0.618373	unchanged
ENSMUSG00000003546	chr17	46630623	46646022	-	Klc4	kinesin light chain 4 [Source:MGI Symbol;Acc:MGI:1922014]	protein_coding	4.9735	-1.26845	0.00474968	Down	0.208813	0.694635	unchanged	0.691306	0.245217	unchanged	0.822368	0.154461	unchanged	0.900646	0.113697	unchanged	0.587531	1	unchanged	0.218924	0.78584	unchanged	0.124073	0.894198	unchanged
ENSMUSG00000003549	chr7	19344777	19356524	+	Ercc1	excision repair cross-complementing rodent repair deficiency, complementation group 1 [Source:MGI Symbol;Acc:MGI:95412]	protein_coding	13.9424	-0.516785	0.10679	unchanged	0.89278	0.00235038	unchanged	-0.0935801	0.93539	unchanged	-0.54538	0.197874	unchanged	-0.800519	0.020146	unchanged	0.00351998	1	unchanged	-0.193308	0.715252	unchanged	-0.179016	0.72203	unchanged
ENSMUSG00000003555	chr19	46667164	46673172	-	Cyp17a1	cytochrome P450, family 17, subfamily a, polypeptide 1 [Source:MGI Symbol;Acc:MGI:88586]	protein_coding	0.824552	-0.494	0.726782	unchanged	-1.30255	0.324069	unchanged	0.147367	NA	unchanged	-0.887635	0.64018	unchanged	0.29784	0.887018	unchanged	-0.325624	1	unchanged	2.93051	NA	unchanged	2.29509	0.0974846	unchanged
ENSMUSG00000003559	chr19	46707457	46741099	+	As3mt	arsenic (+3 oxidation state) methyltransferase [Source:MGI Symbol;Acc:MGI:1929882]	protein_coding	23.4396	-0.478955	0.059309	unchanged	-0.504792	0.0428564	unchanged	-0.487868	0.25094	unchanged	-0.904784	0.00225235	unchanged	-0.794406	0.017801	unchanged	0.294117	1	unchanged	0.425088	0.234067	unchanged	0.564416	0.0808666	unchanged
ENSMUSG00000003573	chr8	70282826	70294361	+	Homer3	homer scaffolding protein 3 [Source:MGI Symbol;Acc:MGI:1347359]	protein_coding	5.56894	-0.295205	0.593602	unchanged	-0.149685	0.818966	unchanged	0.613344	0.488866	unchanged	-0.147601	0.866218	unchanged	1.49297	0.0638903	unchanged	-0.00271611	1	unchanged	0.377921	0.672329	unchanged	-0.126635	0.935989	unchanged
ENSMUSG00000003575	chr8	70382354	70439579	-	Crtc1	CREB regulated transcription coactivator 1 [Source:MGI Symbol;Acc:MGI:2142523]	protein_coding	4.18572	0.158082	0.84383	unchanged	0.739892	0.107608	unchanged	-0.357994	0.873376	unchanged	-0.466753	0.619744	unchanged	-0.899071	0.139818	unchanged	-1.1105	1	unchanged	-0.00731412	0.996098	unchanged	-0.598809	0.260326	unchanged
ENSMUSG00000003581	chr11	4135201	4141172	+	Rnf215	ring finger protein 215 [Source:MGI Symbol;Acc:MGI:1918923]	protein_coding	5.32566	0.67204	0.16966	unchanged	0.827206	0.0768701	unchanged	-0.0978041	0.962193	unchanged	-0.0491877	0.960344	unchanged	0.39791	0.491166	unchanged	0.519428	1	unchanged	-0.299878	0.710196	unchanged	-0.30285	0.612656	unchanged
ENSMUSG00000003585	chr11	4097038	4123415	-	Sec14l2	SEC14-like lipid binding 2 [Source:MGI Symbol;Acc:MGI:1915065]	protein_coding	3.63357	-2.78499	6.6759e-06	Down	-1.58304	0.00214935	Down	-0.200753	0.905182	unchanged	0.717355	0.493162	unchanged	1.08149	0.139603	unchanged	-0.127764	1	unchanged	0.232657	0.843545	unchanged	-0.438318	0.704718	unchanged
ENSMUSG00000003604	chr2	112492963	112634573	+	Aven	apoptosis, caspase activation inhibitor [Source:MGI Symbol;Acc:MGI:1921518]	protein_coding	0.695907	-0.596979	0.722758	unchanged	-1.95175	0.109145	unchanged	1.9017	NA	unchanged	1.37982	0.407501	unchanged	1.52137	0.307717	unchanged	-0.0704998	1	unchanged	-0.621293	NA	unchanged	0.210733	NA	unchanged
ENSMUSG00000003623	chr5	8966032	8997324	-	Crot	carnitine O-octanoyltransferase [Source:MGI Symbol;Acc:MGI:1921364]	protein_coding	27.056	0.860426	0.00026377	unchanged	-0.586893	0.020763	unchanged	0.182943	0.817201	unchanged	-0.0212724	0.973076	unchanged	0.877977	0.000473744	unchanged	0.345319	1	unchanged	0.520645	0.135275	unchanged	0.514048	0.148661	unchanged
ENSMUSG00000003644	chr4	133847289	133887797	-	Rps6ka1	ribosomal protein S6 kinase polypeptide 1 [Source:MGI Symbol;Acc:MGI:104558]	protein_coding	42.7873	0.180036	0.61876	unchanged	3.14477	7.07968e-25	Up	-0.42113	0.516909	unchanged	-1.13118	0.000424441	Down	-0.437172	0.201837	unchanged	0.856057	1	unchanged	-0.45258	0.275017	unchanged	-0.143624	0.780218	unchanged
ENSMUSG00000003660	chr2	127208385	127240451	+	Snrnp200	small nuclear ribonucleoprotein 200 (U5) [Source:MGI Symbol;Acc:MGI:2444401]	protein_coding	119.124	0.175033	0.125416	unchanged	-0.0311167	0.819111	unchanged	0.019595	0.965358	unchanged	-0.261184	0.0354515	unchanged	-0.356405	0.00486903	unchanged	-0.10484	1	unchanged	-0.233685	0.0983927	unchanged	-0.0651716	0.735082	unchanged
ENSMUSG00000003662	chr2	127240937	127247816	-	Ciao1	cytosolic iron-sulfur protein assembly 1 [Source:MGI Symbol;Acc:MGI:1346998]	protein_coding	55.1183	-0.896877	2.13337e-11	unchanged	-0.536647	3.09772e-05	unchanged	0.0801656	0.861263	unchanged	0.196132	0.330072	unchanged	-0.0599115	0.828868	unchanged	0.165349	1	unchanged	-0.0203945	0.95191	unchanged	-0.00985395	0.975309	unchanged
ENSMUSG00000003680	chr19	8774486	8786417	-	Taf6l	TATA-box binding protein associated factor 6 like [Source:MGI Symbol;Acc:MGI:2444957]	protein_coding	17.3319	-0.858604	0.00580808	unchanged	-0.390269	0.218766	unchanged	-0.281658	0.719171	unchanged	-0.0876061	0.894542	unchanged	0.564504	0.0936382	unchanged	0.117564	1	unchanged	-0.0289896	0.969926	unchanged	0.739041	0.031331	unchanged
ENSMUSG00000003721	chr1	121304352	121332589	-	Insig2	insulin induced gene 2 [Source:MGI Symbol;Acc:MGI:1920249]	protein_coding	9.70358	0.382602	0.346715	unchanged	0.583004	0.106259	unchanged	-0.901983	0.192828	unchanged	0.154322	0.790339	unchanged	0.133942	0.817002	unchanged	-0.467795	1	unchanged	-0.117079	0.863699	unchanged	0.360482	0.485768	unchanged
ENSMUSG00000003731	chr4	129643979	129672767	-	Kpna6	karyopherin (importin) alpha 6 [Source:MGI Symbol;Acc:MGI:1100836]	protein_coding	43.4119	0.619621	3.78275e-05	unchanged	0.375172	0.0154107	unchanged	0.131946	0.780819	unchanged	0.149398	0.4636	unchanged	0.0974529	0.709809	unchanged	0.171373	1	unchanged	-0.241743	0.298518	unchanged	0.226194	0.290148	unchanged
ENSMUSG00000003746	chr10	53904784	54076609	-	Man1a	mannosidase 1, alpha [Source:MGI Symbol;Acc:MGI:104677]	protein_coding	0.6774	0.447782	0.840747	unchanged	0.214853	0.931013	unchanged	0.365902	NA	unchanged	-0.301999	0.919984	unchanged	0	1	unchanged	0.731732	1	unchanged	0.100054	NA	unchanged	-0.14994	NA	unchanged
ENSMUSG00000003752	chr7	27207171	27228661	-	Itpkc	inositol 1,4,5-trisphosphate 3-kinase C [Source:MGI Symbol;Acc:MGI:2442554]	protein_coding	9.10743	0.421717	0.270865	unchanged	1.03007	0.00296312	Up	0.855983	0.0932901	unchanged	-0.94434	0.0234934	unchanged	0.065967	0.916306	unchanged	0.267308	1	unchanged	-0.609464	0.217212	unchanged	0.171311	0.773877	unchanged
ENSMUSG00000003762	chr7	27233022	27257950	+	Coq8b	coenzyme Q8B [Source:MGI Symbol;Acc:MGI:1924139]	protein_coding	8.08249	-1.16129	0.00280108	Down	0.653442	0.0767687	unchanged	0.106988	0.934077	unchanged	0.29974	0.651644	unchanged	0.420023	0.300682	unchanged	0.284349	1	unchanged	-0.171811	0.798632	unchanged	-0.403581	0.402646	unchanged
ENSMUSG00000003778	chr18	34598614	34624601	-	Brd8	bromodomain containing 8 [Source:MGI Symbol;Acc:MGI:1925906]	protein_coding	50.5004	1.64742	1.3102e-27	Up	-0.000583771	1	unchanged	0.367326	0.233838	unchanged	-0.315921	0.0589419	unchanged	-0.664019	0.000155684	unchanged	-0.0952187	1	unchanged	-0.198837	0.470102	unchanged	0.00675008	0.983467	unchanged
ENSMUSG00000003779	chr18	34624612	34633277	+	Kif20a	kinesin family member 20A [Source:MGI Symbol;Acc:MGI:1201682]	protein_coding	158.561	0.0331159	0.894696	unchanged	-0.940451	1.43561e-08	unchanged	0.0450004	0.950728	unchanged	0.60402	0.00099934	unchanged	0.355056	0.0892562	unchanged	-0.0510078	1	unchanged	-0.0490308	0.89682	unchanged	0.207513	0.439359	unchanged
ENSMUSG00000003808	chr8	84856988	84869257	+	Farsa	phenylalanyl-tRNA synthetase, alpha subunit [Source:MGI Symbol;Acc:MGI:1913840]	protein_coding	33.6475	-0.0197497	0.952108	unchanged	-0.845113	9.29055e-06	unchanged	0.105832	0.880324	unchanged	0.554491	0.00883463	unchanged	0.380527	0.164885	unchanged	-0.0827663	1	unchanged	-0.189314	0.621123	unchanged	0.373974	0.196801	unchanged
ENSMUSG00000003809	chr8	84886392	84893921	-	Gcdh	glutaryl-Coenzyme A dehydrogenase [Source:MGI Symbol;Acc:MGI:104541]	protein_coding	19.8677	0.383411	0.241376	unchanged	0.63095	0.0258905	unchanged	0.369063	0.595923	unchanged	0.249436	0.549651	unchanged	-0.56341	0.114718	unchanged	-0.0160237	1	unchanged	-0.311932	0.491199	unchanged	-0.0425414	0.94195	unchanged
ENSMUSG00000003810	chr4	116306761	116464183	-	Mast2	microtubule associated serine/threonine kinase 2 [Source:MGI Symbol;Acc:MGI:894676]	protein_coding	17.1994	-0.459754	0.0791105	unchanged	-0.503966	0.0400682	unchanged	-0.391844	0.433148	unchanged	-0.564948	0.0926997	unchanged	0.0615008	0.886655	unchanged	0.0567695	1	unchanged	-0.0263787	0.967075	unchanged	-0.147399	0.754846	unchanged
ENSMUSG00000003812	chr8	84908559	84922915	+	Dnase2a	deoxyribonuclease II alpha [Source:MGI Symbol;Acc:MGI:1329019]	protein_coding	1.97679	1.29564	0.0840502	unchanged	0.510574	0.496405	unchanged	0.863951	0.626358	unchanged	0.257957	0.794235	unchanged	0.871727	0.326565	unchanged	0.132252	1	unchanged	-0.558241	0.641852	unchanged	0.401354	0.743371	unchanged
ENSMUSG00000003813	chr8	84834018	84840665	-	Rad23a	RAD23 homolog A, nucleotide excision repair protein [Source:MGI Symbol;Acc:MGI:105126]	protein_coding	56.4119	0.427513	0.0116595	unchanged	1.44997	7.08259e-23	Up	-0.157583	0.749896	unchanged	-0.232671	0.279317	unchanged	-0.468588	0.0136114	unchanged	-0.146393	1	unchanged	-0.289824	0.15577	unchanged	-0.364843	0.0462749	unchanged
ENSMUSG00000003814	chr8	84841849	84846934	-	Calr	calreticulin [Source:MGI Symbol;Acc:MGI:88252]	protein_coding	478.755	0.752974	0.00852113	unchanged	0.266314	0.411544	unchanged	-0.032161	0.981147	unchanged	1.02612	0.000613688	Up	1.33623	2.07e-06	Up	0.650681	1	unchanged	0.431487	0.305646	unchanged	0.456446	0.226763	unchanged
ENSMUSG00000003824	chr8	84872110	84888221	+	Syce2	synaptonemal complex central element protein 2 [Source:MGI Symbol;Acc:MGI:1919096]	protein_coding	134.139	-0.724084	0.000710819	unchanged	-0.984029	2.00829e-06	unchanged	0.199384	0.737103	unchanged	1.04453	2.06781e-06	Up	1.45806	3.44e-11	Up	0.0732436	1	unchanged	0.0709882	0.875692	unchanged	0.531024	0.0479217	unchanged
ENSMUSG00000003847	chr8	107293469	107379517	+	Nfat5	nuclear factor of activated T cells 5 [Source:MGI Symbol;Acc:MGI:1859333]	protein_coding	4.30948	0.158679	0.850568	unchanged	-1.05406	0.0872811	unchanged	-0.335229	0.884018	unchanged	1.46927	0.0150515	Up	0.221277	0.839154	unchanged	-0.131919	1	unchanged	0.998566	0.256275	unchanged	0.294503	0.811633	unchanged
ENSMUSG00000003848	chr8	107412485	107425051	-	Nob1	NIN1/RPN12 binding protein 1 homolog [Source:MGI Symbol;Acc:MGI:1914869]	protein_coding	84.1136	-0.57585	2.65095e-05	unchanged	-0.779398	1.26571e-09	unchanged	0.00387708	1	unchanged	-0.0816861	0.737444	unchanged	-0.280593	0.143578	unchanged	0.0407982	1	unchanged	0.0293248	0.927328	unchanged	0.13671	0.542175	unchanged
ENSMUSG00000003849	chr8	107388224	107403206	-	Nqo1	NAD(P)H dehydrogenase, quinone 1 [Source:MGI Symbol;Acc:MGI:103187]	protein_coding	14.7977	0.545107	0.356981	unchanged	1.2877	0.026144	Up	-0.130868	0.954616	unchanged	-0.515634	0.486455	unchanged	0.916064	0.192567	unchanged	1.10241	1	unchanged	1.67417	0.00214236	Up	0.79977	0.166779	unchanged
ENSMUSG00000003863	chr7	45339121	45367019	-	Ppfia3	protein tyrosine phosphatase, receptor type, f polypeptide (PTPRF), interacting protein (liprin), alpha 3 [Source:MGI Symbol;Acc:MGI:1924037]	protein_coding	1.09004	-0.998297	0.496602	unchanged	1.15941	0.371843	unchanged	-1.08018	NA	unchanged	0.780022	0.691936	unchanged	-1.13702	0.475269	unchanged	0.0436796	1	unchanged	-0.844507	NA	unchanged	-1.69393	0.239925	unchanged
ENSMUSG00000003865	chr7	45434843	45456619	+	Gys1	glycogen synthase 1, muscle [Source:MGI Symbol;Acc:MGI:101805]	protein_coding	10.0614	-0.433724	0.253969	unchanged	0.607956	0.0841657	unchanged	-0.198681	0.869673	unchanged	0.442825	0.332638	unchanged	0.867616	0.0140401	unchanged	-0.0731437	1	unchanged	-0.702776	0.149094	unchanged	-0.249156	0.668469	unchanged
ENSMUSG00000003868	chr7	45421759	45438096	-	Ruvbl2	RuvB-like protein 2 [Source:MGI Symbol;Acc:MGI:1342299]	protein_coding	168.155	-0.560041	4.85974e-06	unchanged	0.0764257	0.618786	unchanged	0.282729	0.153506	unchanged	0.42556	0.00204073	unchanged	0.289371	0.0480048	unchanged	-0.0257696	1	unchanged	-0.148052	0.476638	unchanged	0.0148182	0.956198	unchanged
ENSMUSG00000003872	chr7	45367890	45370583	-	Lin7b	lin-7 homolog B (C. elegans) [Source:MGI Symbol;Acc:MGI:1330858]	protein_coding	0.243262	-0.273565	NA	unchanged	-0.14582	NA	unchanged	-1.07679	NA	unchanged	-0.301998	NA	unchanged	0.658513	NA	unchanged	-0.316994	1	unchanged	1.50882	NA	unchanged	-0.488233	NA	unchanged
ENSMUSG00000003873	chr7	45461696	45466898	-	Bax	BCL2-associated X protein [Source:MGI Symbol;Acc:MGI:99702]	protein_coding	25.9076	0.283902	0.310954	unchanged	0.414586	0.110173	unchanged	-0.103399	0.919951	unchanged	0.286873	0.366485	unchanged	0.336293	0.298061	unchanged	-0.0359681	1	unchanged	0.250943	0.522399	unchanged	0.22258	0.548139	unchanged
ENSMUSG00000003923	chr10	71225463	71238280	-	Tfam	transcription factor A, mitochondrial [Source:MGI Symbol;Acc:MGI:107810]	protein_coding	50.0001	0.0380371	0.856817	unchanged	-0.750585	1.87155e-08	unchanged	-0.285198	0.318405	unchanged	-0.140926	0.529977	unchanged	-0.321401	0.127944	unchanged	0.197181	1	unchanged	-0.167924	0.513014	unchanged	-0.164267	0.517287	unchanged
ENSMUSG00000003929	chr17	33329341	33358878	-	Zfp81	zinc finger protein 81 [Source:MGI Symbol;Acc:MGI:1890752]	protein_coding	10.3	-0.474178	0.155152	unchanged	-0.478911	0.125842	unchanged	-0.301133	0.704101	unchanged	-0.00601977	0.997242	unchanged	-0.273448	0.588306	unchanged	-0.487731	1	unchanged	-0.150138	0.812195	unchanged	-0.12805	0.866084	unchanged
ENSMUSG00000003934	chr11	69554091	69560205	-	Efnb3	ephrin B3 [Source:MGI Symbol;Acc:MGI:109196]	protein_coding	5.34946	2.85003	4.4257e-06	Up	2.3029	7.69318e-05	Up	-1.00503	0.68224	unchanged	-1.56692	0.0059485	Down	-5.43755	3.48e-10	Down	-0.332041	1	unchanged	-0.722745	0.331852	unchanged	-1.21263	0.0386737	Down
ENSMUSG00000003948	chr11	90249455	90278589	+	Mmd	monocyte to macrophage differentiation-associated [Source:MGI Symbol;Acc:MGI:1914718]	protein_coding	0.720879	0.447782	0.829656	unchanged	1.29687	0.458054	unchanged	0	NA	unchanged	-0.301999	0.913493	unchanged	-0.423507	0.861817	unchanged	0.765026	1	unchanged	0.100054	NA	unchanged	1.02023	NA	unchanged
ENSMUSG00000003949	chr11	90336535	90390895	-	Hlf	hepatic leukemia factor [Source:MGI Symbol;Acc:MGI:96108]	protein_coding	4.24807	-2.1824	0.0162866	Down	0.1911	0.846304	unchanged	-0.692436	0.755423	unchanged	2.05967	0.0466695	Up	0.021269	0.994547	unchanged	-0.180304	1	unchanged	-0.899109	0.441967	unchanged	-0.358228	0.792314	unchanged
ENSMUSG00000003955	chr16	36043760	36071594	-	Fam162a	family with sequence similarity 162, member A [Source:MGI Symbol;Acc:MGI:1917436]	protein_coding	73.7868	3.89757	1.01666e-28	Up	4.36511	8.96264e-54	Up	0.0525392	0.982051	unchanged	-0.950289	0.000228276	unchanged	-1.00548	1.35e-05	Down	0.054824	1	unchanged	0.333859	0.285521	unchanged	0.533203	0.034896	unchanged
ENSMUSG00000003970	chr15	76904077	76906314	+	Rpl8	ribosomal protein L8 [Source:MGI Symbol;Acc:MGI:1350927]	protein_coding	2146.06	-0.313888	0.000210626	unchanged	0.336356	5.41683e-05	unchanged	0.0926938	0.674873	unchanged	0.151944	0.15106	unchanged	0.182692	0.0572722	unchanged	0.00179523	1	unchanged	0.0389238	0.819263	unchanged	0.288734	0.00282171	unchanged
ENSMUSG00000003992	chr13	91460282	91703429	+	Ssbp2	single-stranded DNA binding protein 2 [Source:MGI Symbol;Acc:MGI:1914220]	protein_coding	0.933765	-0.964273	0.520464	unchanged	-2.39344	0.042973	Down	-0.685479	NA	unchanged	1.08624	0.553637	unchanged	1.14998	0.450554	unchanged	-0.833773	1	unchanged	3.32922	NA	unchanged	1.49451	0.388367	unchanged
ENSMUSG00000004018	chr11	26386134	26471876	+	Fancl	Fanconi anemia, complementation group L [Source:MGI Symbol;Acc:MGI:1914280]	protein_coding	14.633	0.265718	0.417192	unchanged	-1.0161	0.000143626	Down	0.047273	0.970028	unchanged	-1.1704	0.000702826	Down	-1.31091	0.000172447	Down	-0.0465846	1	unchanged	7.0882e-05	1	unchanged	-0.21984	0.649367	unchanged
ENSMUSG00000004032	chr3	107895820	107898686	+	Gstm5	glutathione S-transferase, mu 5 [Source:MGI Symbol;Acc:MGI:1309466]	protein_coding	1.46138	1.02255	0.452752	unchanged	-0.863888	0.556121	unchanged	0.925505	NA	unchanged	-1.59811	0.283688	unchanged	0.209023	0.895296	unchanged	0.0541813	1	unchanged	2.17836	0.150431	unchanged	-0.796747	0.622835	unchanged
ENSMUSG00000004035	chr3	107926333	107931817	-	Gstm7	glutathione S-transferase, mu 7 [Source:MGI Symbol;Acc:MGI:1915562]	protein_coding	6.43386	2.50186	0.00020475	Up	3.78798	5.79432e-06	Up	-0.806147	0.731207	unchanged	0.660896	0.397416	unchanged	2.28854	0.000307349	Up	0.457866	1	unchanged	0.00210428	1	unchanged	-0.0983475	0.946966	unchanged
ENSMUSG00000004038	chr3	107963695	107969283	-	Gstm3	glutathione S-transferase, mu 3 [Source:MGI Symbol;Acc:MGI:106026]	protein_coding	1.53982	1.74719	0.152598	unchanged	4.07237	1.60696e-05	Up	0.00522893	1	unchanged	-1.96208	0.155856	unchanged	-3.13149	0.00261269	Down	0.404353	1	unchanged	-0.505731	0.696077	unchanged	-1.62959	0.173242	unchanged
ENSMUSG00000004040	chr11	100885097	100939540	-	Stat3	signal transducer and activator of transcription 3 [Source:MGI Symbol;Acc:MGI:103038]	protein_coding	114.019	1.58431	9.90774e-23	Up	1.6121	3.10869e-23	Up	-0.217075	0.63065	unchanged	-0.106786	0.680491	unchanged	0.77786	3.17e-06	unchanged	0.137637	1	unchanged	0.0763504	0.813964	unchanged	0.0266336	0.941004	unchanged
ENSMUSG00000004043	chr11	100859350	100885169	+	Stat5a	signal transducer and activator of transcription 5A [Source:MGI Symbol;Acc:MGI:103036]	protein_coding	8.95596	-0.919781	0.000842867	unchanged	-0.387687	0.238791	unchanged	-0.154602	0.867595	unchanged	0.11177	0.839256	unchanged	1.65142	0.00169937	Up	-0.0515566	1	unchanged	-0.23472	0.703828	unchanged	1.26511	0.00179309	Up
ENSMUSG00000004044	chr11	100956732	100970887	-	Cavin1	caveolae associated 1 [Source:MGI Symbol;Acc:MGI:1277968]	protein_coding	7.55288	-0.352945	0.506943	unchanged	-1.62248	0.00176416	Down	0.800313	0.292513	unchanged	1.72634	0.000102142	Up	3.63188	1.26e-05	Up	-0.138774	1	unchanged	-0.0406406	0.977416	unchanged	1.01101	0.537589	unchanged
ENSMUSG00000004054	chr19	5688741	5702865	+	Map3k11	mitogen-activated protein kinase kinase kinase 11 [Source:MGI Symbol;Acc:MGI:1346880]	protein_coding	9.66076	-0.453541	0.237508	unchanged	1.00377	0.0015576	Up	0.141894	0.908122	unchanged	0.231208	0.68749	unchanged	-0.550749	0.111329	unchanged	-0.00386314	1	unchanged	0.314712	0.489139	unchanged	-0.366019	0.371099	unchanged
ENSMUSG00000004056	chr7	27591551	27640826	+	Akt2	thymoma viral proto-oncogene 2 [Source:MGI Symbol;Acc:MGI:104874]	protein_coding	71.4841	0.206629	0.210183	unchanged	1.28548	3.32172e-21	Up	-0.0907837	0.870135	unchanged	-0.443175	0.00964432	unchanged	-0.263424	0.129574	unchanged	0.174503	1	unchanged	-0.133381	0.568152	unchanged	-0.0165027	0.956198	unchanged
ENSMUSG00000004069	chr16	4639988	4707695	+	Dnaja3	DnaJ heat shock protein family (Hsp40) member A3 [Source:MGI Symbol;Acc:MGI:1933786]	protein_coding	64.0739	-0.56253	4.29831e-06	unchanged	-0.255747	0.0353585	unchanged	0.214118	0.315011	unchanged	0.191834	0.261714	unchanged	0.153449	0.39741	unchanged	0.0409859	1	unchanged	-0.221743	0.232112	unchanged	-0.319144	0.0369332	unchanged
ENSMUSG00000004070	chr16	4726360	4766742	+	Hmox2	heme oxygenase 2 [Source:MGI Symbol;Acc:MGI:109373]	protein_coding	25.1369	0.650705	0.000497356	unchanged	0.257899	0.22033	unchanged	-0.159881	0.798989	unchanged	-0.468432	0.0288894	unchanged	-0.677046	0.0074818	unchanged	0.166117	1	unchanged	-0.0356442	0.936941	unchanged	0.196968	0.503455	unchanged
ENSMUSG00000004071	chr16	4750347	4790292	-	Cdip1	cell death inducing Trp53 target 1 [Source:MGI Symbol;Acc:MGI:1913876]	protein_coding	25.1677	-0.323906	0.222505	unchanged	-0.907451	4.74113e-05	unchanged	0.130598	0.876096	unchanged	0.254209	0.456027	unchanged	-0.109453	0.799111	unchanged	-0.141904	1	unchanged	0.357778	0.324805	unchanged	-0.0702038	0.891334	unchanged
ENSMUSG00000004085	chr2	72285636	72442610	+	Map3k20	mitogen-activated protein kinase kinase kinase 20 [Source:MGI Symbol;Acc:MGI:2443258]	protein_coding	6.54975	-0.361113	0.593231	unchanged	-0.0752284	0.919997	unchanged	-0.591135	0.679654	unchanged	0.959653	0.13314	unchanged	1.58247	0.00196253	Up	-0.139844	1	unchanged	0.220988	0.82162	unchanged	0.504656	0.482902	unchanged
ENSMUSG00000004096	chr9	14500616	14510577	+	Cwc15	CWC15 spliceosome-associated protein [Source:MGI Symbol;Acc:MGI:1913320]	protein_coding	139.299	-0.0728456	0.604457	unchanged	-0.720307	1.62011e-12	unchanged	0.0685974	0.866749	unchanged	-0.0461816	0.817674	unchanged	0.0245865	0.901231	unchanged	-0.0443461	1	unchanged	-0.17029	0.324805	unchanged	-0.085631	0.663568	unchanged
ENSMUSG00000004098	chr9	20770049	20815067	-	Col5a3	collagen, type V, alpha 3 [Source:MGI Symbol;Acc:MGI:1858212]	protein_coding	1.55932	-3.24991	0.00110663	Down	-2.26689	0.00823646	Down	0.176733	0.951512	unchanged	2.95606	0.00935919	Up	1.38998	0.358102	unchanged	-0.612262	1	unchanged	2.31047	0.0340604	Up	2.55763	0.035766	Up
ENSMUSG00000004099	chr9	20907208	20959888	-	Dnmt1	DNA methyltransferase (cytosine-5) 1 [Source:MGI Symbol;Acc:MGI:94912]	protein_coding	54.838	0.93888	8.70208e-09	unchanged	1.04013	1.90146e-14	Up	-0.0283878	0.974428	unchanged	-0.77317	1.03606e-05	unchanged	-0.638903	3.24e-05	unchanged	-0.284822	1	unchanged	0.0370665	0.894634	unchanged	-0.0813376	0.722606	unchanged
ENSMUSG00000004100	chr9	20888174	20892178	+	Ppan	peter pan homolog [Source:MGI Symbol;Acc:MGI:2178445]	protein_coding	74.8471	0.153171	0.417797	unchanged	-0.330419	0.0436016	unchanged	0.083554	0.888013	unchanged	-0.517877	0.00430379	unchanged	-0.522446	0.00872994	unchanged	-0.107314	1	unchanged	-0.374544	0.0919348	unchanged	-0.387147	0.0557362	unchanged
ENSMUSG00000004113	chr2	24603886	24763152	-	Cacna1b	calcium channel, voltage-dependent, N type, alpha 1B subunit [Source:MGI Symbol;Acc:MGI:88296]	protein_coding	0.381835	-0.634238	0.813975	unchanged	-1.81603	0.403865	unchanged	0.399506	NA	unchanged	0.780021	NA	unchanged	-0.0628332	NA	unchanged	0.0635752	1	unchanged	0	NA	unchanged	0	NA	unchanged
ENSMUSG00000004127	chr3	138143447	138159821	+	Trmt10a	tRNA methyltransferase 10A [Source:MGI Symbol;Acc:MGI:1920421]	protein_coding	27.2126	-0.378488	0.0924067	unchanged	-0.820979	4.1268e-05	unchanged	-0.173984	0.773724	unchanged	-0.183859	0.579987	unchanged	-0.477073	0.127079	unchanged	-0.062575	1	unchanged	-0.612878	0.0399348	unchanged	-0.573269	0.0836818	unchanged
ENSMUSG00000004151	chr12	38779379	38870484	+	Etv1	ets variant 1 [Source:MGI Symbol;Acc:MGI:99254]	protein_coding	3.72272	2.83798	0.0139402	Up	4.66766	3.60756e-06	Up	0	1	unchanged	-2.6922	0.0383261	Down	-5.07391	7.48e-07	Down	0	1	unchanged	-4.35276	0.000222966	Down	-5.29708	6.16954e-07	Down
ENSMUSG00000004187	chr15	76659857	76668196	+	Kifc2	kinesin family member C2 [Source:MGI Symbol;Acc:MGI:109187]	protein_coding	1.04612	0.0739422	0.959358	unchanged	1.99893	0.0605134	unchanged	-1.17866	NA	unchanged	-2.54902	0.0333303	Down	-1.35591	0.321055	unchanged	1.85074	1	unchanged	-0.507909	NA	unchanged	-0.225292	0.894664	unchanged
ENSMUSG00000004207	chr10	60277626	60302597	+	Psap	prosaposin [Source:MGI Symbol;Acc:MGI:97783]	protein_coding	642.375	0.979881	3.59059e-07	unchanged	1.26927	2.62732e-11	Up	0.363385	0.334145	unchanged	0.779295	0.000200404	unchanged	1.66911	1.34e-18	Up	0.260784	1	unchanged	0.232981	0.473295	unchanged	0.679914	0.00236486	unchanged
ENSMUSG00000004221	chrX	74393289	74453854	+	Ikbkg	inhibitor of kappaB kinase gamma [Source:MGI Symbol;Acc:MGI:1338074]	protein_coding	18.8178	0.363155	0.243083	unchanged	-0.441735	0.122939	unchanged	-0.0698903	0.954348	unchanged	0.0267546	0.970753	unchanged	0.887934	0.00238691	unchanged	0.130193	1	unchanged	-0.0703478	0.908575	unchanged	0.235681	0.620617	unchanged
ENSMUSG00000004233	chr3	99141067	99239186	+	Wars2	tryptophanyl tRNA synthetase 2 (mitochondrial) [Source:MGI Symbol;Acc:MGI:1917810]	protein_coding	20.7443	-0.0309099	0.953076	unchanged	-1.16808	0.000545727	Down	0.22544	0.821487	unchanged	0.937242	0.00568836	unchanged	0.809484	0.0389642	unchanged	-0.312291	1	unchanged	0.36863	0.544515	unchanged	0.720104	0.125054	unchanged
ENSMUSG00000004263	chr6	124742543	124756524	-	Atn1	atrophin 1 [Source:MGI Symbol;Acc:MGI:104725]	protein_coding	83.1924	-0.166452	0.322313	unchanged	-0.0700377	0.717499	unchanged	-0.0918969	0.863421	unchanged	0.221779	0.240698	unchanged	0.470849	0.00331361	unchanged	-0.0141449	1	unchanged	0.329616	0.102959	unchanged	0.984458	7.03163e-11	unchanged
ENSMUSG00000004264	chr6	124712335	124716950	+	Phb2	prohibitin 2 [Source:MGI Symbol;Acc:MGI:102520]	protein_coding	289.055	0.34502	0.00144006	unchanged	0.642287	5.96626e-10	unchanged	-0.290782	0.0856019	unchanged	-0.0330098	0.870456	unchanged	0.3122	0.0107852	unchanged	0.0225035	1	unchanged	-0.106883	0.562594	unchanged	0.408019	0.000716973	unchanged
ENSMUSG00000004266	chr6	124720706	124738714	-	Ptpn6	protein tyrosine phosphatase, non-receptor type 6 [Source:MGI Symbol;Acc:MGI:96055]	protein_coding	12.1843	-0.756709	0.0420943	unchanged	-1.47164	8.25582e-05	Down	0.592928	0.341242	unchanged	0.62215	0.164329	unchanged	-0.601472	0.267894	unchanged	0.393358	1	unchanged	-0.674284	0.343083	unchanged	-0.390603	0.583778	unchanged
ENSMUSG00000004267	chr6	124760052	124769673	-	Eno2	enolase 2, gamma neuronal [Source:MGI Symbol;Acc:MGI:95394]	protein_coding	0.955764	-1.96134	0.0326977	Down	-1.49263	0.182491	unchanged	-4.11851	NA	unchanged	-2.37729	0.0848592	unchanged	-0.78418	0.672834	unchanged	0.131467	1	unchanged	0.37539	NA	unchanged	1.29275	0.511525	unchanged
ENSMUSG00000004268	chr6	124704084	124712178	-	Emg1	EMG1 N1-specific pseudouridine methyltransferase [Source:MGI Symbol;Acc:MGI:1315195]	protein_coding	247.416	-0.723612	1.34899e-10	unchanged	-1.04337	7.61817e-21	Down	-0.141724	0.614753	unchanged	0.258414	0.0672105	unchanged	-0.247915	0.109853	unchanged	-0.0349905	1	unchanged	-0.300655	0.0668389	unchanged	-0.46725	0.00109424	unchanged
ENSMUSG00000004270	chr6	124663026	124704418	+	Lpcat3	lysophosphatidylcholine acyltransferase 3 [Source:MGI Symbol;Acc:MGI:1315211]	protein_coding	261.057	0.127185	0.483156	unchanged	-0.0612371	0.756336	unchanged	0.216958	0.516909	unchanged	0.471097	0.00412039	unchanged	0.108731	0.608937	unchanged	0.0602165	1	unchanged	-0.194211	0.423263	unchanged	0.199771	0.361581	unchanged
ENSMUSG00000004285	chr6	29467717	29470512	+	Atp6v1f	ATPase, H+ transporting, lysosomal V1 subunit F [Source:MGI Symbol;Acc:MGI:1913394]	protein_coding	140.09	0.164039	0.322257	unchanged	0.712749	1.14615e-07	unchanged	-0.0781363	0.883275	unchanged	-0.165897	0.410206	unchanged	-0.0461114	0.836725	unchanged	0.094326	1	unchanged	0.129665	0.582615	unchanged	-0.0634375	0.803085	unchanged
ENSMUSG00000004317	chrX	7153809	7319358	-	Clcn5	chloride channel, voltage-sensitive 5 [Source:MGI Symbol;Acc:MGI:99486]	protein_coding	41.5596	-0.451728	0.223624	unchanged	-1.42758	2.63805e-05	Down	0.08544	0.950846	unchanged	1.04186	0.00407765	Up	1.8839	2.16e-08	Up	0.15191	1	unchanged	1.0111	0.0225578	Up	0.445804	0.370734	unchanged
ENSMUSG00000004319	chr8	60910388	60983300	-	Clcn3	chloride channel, voltage-sensitive 3 [Source:MGI Symbol;Acc:MGI:103555]	protein_coding	48.0076	0.592233	0.00150677	unchanged	-0.0239485	0.931013	unchanged	0.0229211	0.979827	unchanged	0.20159	0.412923	unchanged	-0.0199959	0.956613	unchanged	-0.104435	1	unchanged	0.14693	0.649691	unchanged	-0.614988	0.0053754	unchanged
ENSMUSG00000004328	chr7	17031506	17062427	-	Hif3a	hypoxia inducible factor 3, alpha subunit [Source:MGI Symbol;Acc:MGI:1859778]	protein_coding	1.26243	-0.501335	0.749096	unchanged	3.20045	0.00261928	Up	0.36715	NA	unchanged	-1.02487	0.590206	unchanged	-2.80979	0.0188757	Down	-0.316994	1	unchanged	-0.458164	NA	unchanged	-0.270017	0.894198	unchanged
ENSMUSG00000004341	chr13	21312124	21319624	+	Gpx6	glutathione peroxidase 6 [Source:MGI Symbol;Acc:MGI:1922762]	protein_coding	1.20595	-0.273565	0.916655	unchanged	0.575526	0.803025	unchanged	-0.355444	NA	unchanged	0.419348	0.899522	unchanged	3.17346	0.0746466	unchanged	0	1	unchanged	5.20957	NA	unchanged	2.91031	0.146146	unchanged
ENSMUSG00000004356	chr10	88746606	88826804	-	Utp20	UTP20 small subunit processome component [Source:MGI Symbol;Acc:MGI:1917933]	protein_coding	27.4313	0.252329	0.290665	unchanged	-0.763331	0.000296057	unchanged	-0.278396	0.592828	unchanged	-0.130298	0.702297	unchanged	-0.287413	0.413457	unchanged	-0.0504094	1	unchanged	-0.525134	0.114159	unchanged	-0.361692	0.289571	unchanged
ENSMUSG00000004359	chr10	88674771	88685015	-	Spic	Spi-C transcription factor (Spi-1/PU.1 related) [Source:MGI Symbol;Acc:MGI:1341168]	protein_coding	118.538	0.238132	0.540125	unchanged	0.216255	0.575607	unchanged	-0.760797	0.142099	unchanged	-1.4796	8.84864e-06	Down	-1.7732	8.14e-08	Down	-0.273888	1	unchanged	-1.36297	0.000193669	Down	-0.691104	0.0884841	unchanged
ENSMUSG00000004364	chr1	80264922	80340480	-	Cul3	cullin 3 [Source:MGI Symbol;Acc:MGI:1347360]	protein_coding	130.764	0.528882	9.5925e-07	unchanged	-0.84554	8.65163e-18	unchanged	0.00605773	1	unchanged	-0.168089	0.229982	unchanged	-0.145949	0.337694	unchanged	0.014155	1	unchanged	0.0176364	0.9453	unchanged	0.0489948	0.821583	unchanged
ENSMUSG00000004371	chr7	4772372	4782859	-	Il11	interleukin 11 [Source:MGI Symbol;Acc:MGI:107613]	protein_coding	0.987687	0.0798275	0.951444	unchanged	0.575527	0.714038	unchanged	0.102542	NA	unchanged	1.4538	0.0755316	unchanged	1.01919	0.533421	unchanged	1.57816	1	unchanged	-0.26062	NA	unchanged	0.210733	0.938595	unchanged
ENSMUSG00000004383	chr8	72814598	73353540	-	Large1	LARGE xylosyl- and glucuronyltransferase 1 [Source:MGI Symbol;Acc:MGI:1342270]	protein_coding	1.4647	1.74485	0.154581	unchanged	1.92723	0.0654646	unchanged	0.00522893	NA	unchanged	-1.95974	0.158109	unchanged	-2.15902	0.0441347	Down	0.351247	1	unchanged	-0.594357	0.704287	unchanged	-1.43088	0.16094	unchanged
ENSMUSG00000004393	chr11	6258918	6267772	-	Ddx56	DEAD (Asp-Glu-Ala-Asp) box polypeptide 56 [Source:MGI Symbol;Acc:MGI:1277172]	protein_coding	69.5412	0.193327	0.271152	unchanged	0.177188	0.307918	unchanged	0.240467	0.462486	unchanged	0.290025	0.11866	unchanged	0.224511	0.297292	unchanged	0.0182004	1	unchanged	-0.305509	0.171422	unchanged	0.254932	0.250855	unchanged
ENSMUSG00000004394	chr11	6270368	6274870	-	Tmed4	transmembrane p24 trafficking protein 4 [Source:MGI Symbol;Acc:MGI:1915070]	protein_coding	24.8829	-0.114864	0.652008	unchanged	-0.398815	0.0337797	unchanged	0.102102	0.884782	unchanged	0.143366	0.647569	unchanged	-0.0859948	0.793313	unchanged	-0.21229	1	unchanged	0.107886	0.77566	unchanged	0.0202662	0.960728	unchanged
ENSMUSG00000004415	chr5	136741758	136883209	-	Col26a1	collagen, type XXVI, alpha 1 [Source:MGI Symbol;Acc:MGI:2155345]	protein_coding	1.64948	0.765813	0.421278	unchanged	2.45302	0.0018735	Up	-0.122885	0.976134	unchanged	-0.651515	0.595183	unchanged	-0.108045	0.947237	unchanged	-0.132407	1	unchanged	-0.697739	0.519614	unchanged	-0.643373	0.58119	unchanged
ENSMUSG00000004446	chr6	120891929	120916853	-	Bid	BH3 interacting domain death agonist [Source:MGI Symbol;Acc:MGI:108093]	protein_coding	18.8413	-2.34602	3.86676e-12	Down	-2.40378	8.34179e-14	Down	-0.248197	0.7833	unchanged	-1.18307	0.0293374	Down	-2.4112	3.4e-05	Down	-0.14571	1	unchanged	-0.659149	0.289089	unchanged	-0.629041	0.258457	unchanged
ENSMUSG00000004451	chr1	119470304	119504794	-	Ralb	v-ral simian leukemia viral oncogene B [Source:MGI Symbol;Acc:MGI:1927244]	protein_coding	20.4702	1.74644	1.09233e-10	Up	2.17311	3.59809e-16	Up	0.575881	0.30603	unchanged	-0.624873	0.0315727	unchanged	-0.383481	0.204201	unchanged	0.247773	1	unchanged	-0.739832	0.0160962	unchanged	-0.447627	0.170165	unchanged
ENSMUSG00000004455	chr5	122158277	122175273	+	Ppp1cc	protein phosphatase 1 catalytic subunit gamma [Source:MGI Symbol;Acc:MGI:104872]	protein_coding	179.729	-0.342419	0.00779769	unchanged	-0.411453	0.00108156	unchanged	0.19905	0.437764	unchanged	0.115552	0.541347	unchanged	0.537885	4.09e-05	unchanged	0.102166	1	unchanged	0.482476	0.00117619	unchanged	0.277444	0.0851461	unchanged
ENSMUSG00000004460	chr16	22857844	22879634	+	Dnajb11	DnaJ heat shock protein family (Hsp40) member B11 [Source:MGI Symbol;Acc:MGI:1915088]	protein_coding	63.2248	-0.317672	0.093737	unchanged	-1.68528	4.05591e-23	Down	-0.198426	0.651844	unchanged	0.494927	0.012676	unchanged	0.401055	0.0620786	unchanged	0.254416	1	unchanged	0.116953	0.758595	unchanged	-0.0822997	0.814379	unchanged
ENSMUSG00000004462	chr16	22813213	22857669	-	Tbccd1	TBCC domain containing 1 [Source:MGI Symbol;Acc:MGI:1917823]	protein_coding	17.6882	-0.635342	0.0196554	unchanged	-0.83702	0.000814331	unchanged	0.177794	0.821012	unchanged	0.624422	0.0439189	unchanged	0.524266	0.105925	unchanged	0.274422	1	unchanged	0.0123299	0.985046	unchanged	0.147682	0.772008	unchanged
ENSMUSG00000004473	chr7	44302686	44306902	-	Clec11a	C-type lectin domain family 11, member a [Source:MGI Symbol;Acc:MGI:1298219]	protein_coding	1.83962	3.25807	0.00112699	Up	3.64056	0.000229485	Up	0.726576	0.871833	unchanged	-0.427293	0.731043	unchanged	0.757665	0.319633	unchanged	0.404353	1	unchanged	-0.426486	0.778566	unchanged	-0.612888	0.594789	unchanged
ENSMUSG00000004500	chr7	12965837	12974236	+	Zfp324	zinc finger protein 324 [Source:MGI Symbol;Acc:MGI:2444641]	protein_coding	0.780909	-0.423601	0.715866	unchanged	-1.48452	0.202701	unchanged	-0.724399	NA	unchanged	1.33332	0.200342	unchanged	1.08859	0.43768	unchanged	0.376416	1	unchanged	0.460727	NA	unchanged	-0.148634	NA	unchanged
ENSMUSG00000004508	chr7	97081585	97308946	+	Gab2	growth factor receptor bound protein 2-associated protein 2 [Source:MGI Symbol;Acc:MGI:1333854]	protein_coding	4.82286	1.53258	0.00690489	Up	-0.548834	0.368973	unchanged	-0.926451	0.588476	unchanged	0.335939	0.641021	unchanged	1.30896	0.0246988	Up	0.098494	1	unchanged	0.187439	0.873134	unchanged	2.18133	2.14854e-05	Up
ENSMUSG00000004530	chr5	113842435	113908758	-	Coro1c	coronin, actin binding protein 1C [Source:MGI Symbol;Acc:MGI:1345964]	protein_coding	104.338	-0.640359	4.71421e-05	unchanged	-0.573573	0.000295191	unchanged	0.164544	0.686174	unchanged	0.0527991	0.863797	unchanged	0.931341	4.16e-08	unchanged	0.147602	1	unchanged	-0.0334537	0.929615	unchanged	-0.282247	0.206648	unchanged
ENSMUSG00000004535	chr6	52713728	52766780	+	Tax1bp1	Tax1 (human T cell leukemia virus type I) binding protein 1 [Source:MGI Symbol;Acc:MGI:1289308]	protein_coding	121.27	-1.07417	3.38811e-16	Down	-1.85344	1.42083e-45	Down	0.0984572	0.816099	unchanged	0.140739	0.503924	unchanged	-0.11558	0.590012	unchanged	0.0635086	1	unchanged	0.33509	0.0962937	unchanged	0.0961416	0.707929	unchanged
ENSMUSG00000004558	chr14	51905270	51914158	-	Ndrg2	N-myc downstream regulated gene 2 [Source:MGI Symbol;Acc:MGI:1352498]	protein_coding	0.665717	0.789936	0.634841	unchanged	0.575527	0.744372	unchanged	1.62613	NA	unchanged	-0.266224	0.912489	unchanged	0.658514	0.74411	unchanged	2.50509	1	unchanged	0.100054	NA	unchanged	0	NA	unchanged
ENSMUSG00000004561	chr14	51884841	51893039	+	Mettl17	methyltransferase like 17 [Source:MGI Symbol;Acc:MGI:1098577]	protein_coding	19.3014	-0.67804	0.0176196	unchanged	-1.02741	0.00052837	Down	0.0171372	0.997182	unchanged	0.478584	0.173577	unchanged	0.478839	0.169783	unchanged	0.15884	1	unchanged	-0.34462	0.553528	unchanged	-0.0361209	0.957516	unchanged
ENSMUSG00000004565	chr8	3515383	3544267	+	Pnpla6	patatin-like phospholipase domain containing 6 [Source:MGI Symbol;Acc:MGI:1354723]	protein_coding	20.1323	0.980145	0.000239946	unchanged	2.02246	7.64353e-16	Up	-1.18475	0.00646558	Down	-1.50655	4.03326e-07	Down	-1.44867	3.56e-05	Down	0.47972	1	unchanged	-0.859188	0.00324838	unchanged	-0.85302	0.00209346	unchanged
ENSMUSG00000004567	chr8	3500456	3515232	+	Mcoln1	mucolipin 1 [Source:MGI Symbol;Acc:MGI:1890498]	protein_coding	5.48632	1.33561	0.00559389	Up	1.31818	0.00131243	Up	0.350433	0.844423	unchanged	-0.278609	0.667774	unchanged	-0.636284	0.235858	unchanged	-0.374855	1	unchanged	-0.913345	0.093393	unchanged	-0.678906	0.217265	unchanged
ENSMUSG00000004568	chr8	3353414	3456601	+	Arhgef18	rho/rac guanine nucleotide exchange factor (GEF) 18 [Source:MGI Symbol;Acc:MGI:2142567]	protein_coding	39.3149	1.08693	6.54552e-05	Up	0.704358	0.00830075	unchanged	-0.45754	0.474491	unchanged	-0.615306	0.0527425	unchanged	-0.0872545	0.835472	unchanged	-0.257325	1	unchanged	-0.208563	0.660387	unchanged	-0.621908	0.057118	unchanged
ENSMUSG00000004591	chr3	142790901	142882004	-	Pkn2	protein kinase N2 [Source:MGI Symbol;Acc:MGI:109211]	protein_coding	82.6511	0.332876	0.0162161	unchanged	-0.0905933	0.576128	unchanged	-0.250088	0.346806	unchanged	-0.0703132	0.752887	unchanged	0.068945	0.759782	unchanged	-0.0519105	1	unchanged	0.105704	0.670278	unchanged	-0.0811423	0.750164	unchanged
ENSMUSG00000004610	chr7	43444082	43457800	+	Etfb	electron transferring flavoprotein, beta polypeptide [Source:MGI Symbol;Acc:MGI:106098]	protein_coding	146.352	1.08487	3.16729e-17	Up	0.923228	8.41041e-13	unchanged	0.135067	0.729124	unchanged	0.0790779	0.707737	unchanged	0.375184	0.00780598	unchanged	0.148972	1	unchanged	0.0241517	0.937791	unchanged	0.11748	0.561888	unchanged
ENSMUSG00000004626	chr8	3630954	3643644	+	Stxbp2	syntaxin binding protein 2 [Source:MGI Symbol;Acc:MGI:107370]	protein_coding	43.1512	-0.145249	0.514076	unchanged	1.67695	7.09024e-23	Up	-0.440039	0.152201	unchanged	0.0974831	0.75513	unchanged	0.353874	0.061878	unchanged	0.168562	1	unchanged	0.117914	0.681148	unchanged	0.234972	0.271552	unchanged
ENSMUSG00000004631	chr6	4674349	4747207	-	Sgce	sarcoglycan, epsilon [Source:MGI Symbol;Acc:MGI:1329042]	protein_coding	5.34468	-2.80255	8.6887e-06	Down	-2.96002	0.000143835	Down	1.07573	0.135203	unchanged	2.18422	0.00245894	Up	3.34181	0.000616751	Up	0.00664239	1	unchanged	-0.471634	0.829413	unchanged	2.4904	0.0406751	Up
ENSMUSG00000004633	chr6	54039553	54301810	+	Chn2	chimerin 2 [Source:MGI Symbol;Acc:MGI:1917243]	protein_coding	2.21327	-4.59522	2.30943e-07	Down	-5.39723	2.6135e-10	Down	0.251203	0.897651	unchanged	2.94421	0.00865411	Up	0.653052	0.705147	unchanged	-0.522897	1	unchanged	0.821401	0.713354	unchanged	-1.82404	0.170032	unchanged
ENSMUSG00000004637	chr8	114439654	115352708	+	Wwox	WW domain-containing oxidoreductase [Source:MGI Symbol;Acc:MGI:1931237]	protein_coding	1.98294	2.60825	0.00799094	Up	1.76564	0.0130572	Up	0.00522893	1	unchanged	-0.732065	0.520243	unchanged	-0.680521	0.374152	unchanged	0.0423912	1	unchanged	-0.153137	0.899229	unchanged	-0.448196	0.677967	unchanged
ENSMUSG00000004642	chr5	33634951	33652574	-	Slbp	stem-loop binding protein [Source:MGI Symbol;Acc:MGI:108402]	protein_coding	139.032	-0.545128	0.00128005	unchanged	-0.457746	0.00853534	unchanged	0.195174	0.633783	unchanged	-0.000371552	1	unchanged	0.4196	0.03198	unchanged	0.363355	1	unchanged	0.803182	2.19589e-05	unchanged	-0.0836581	0.799302	unchanged
ENSMUSG00000004661	chr9	57790352	57836793	-	Arid3b	AT rich interactive domain 3B (BRIGHT-like) [Source:MGI Symbol;Acc:MGI:1930768]	protein_coding	31.7842	-0.306124	0.188436	unchanged	0.559328	0.00566983	unchanged	-0.525703	0.125817	unchanged	-0.404904	0.153991	unchanged	-0.1717	0.540614	unchanged	0.0067603	1	unchanged	0.0343672	0.939846	unchanged	-0.221096	0.46704	unchanged
ENSMUSG00000004665	chr10	79988583	79996062	+	Cnn2	calponin 2 [Source:MGI Symbol;Acc:MGI:105093]	protein_coding	34.0201	-0.858011	0.14164	unchanged	-0.847833	0.120078	unchanged	0.359666	0.835229	unchanged	0.0292188	0.98742	unchanged	-0.570343	0.367081	unchanged	0.106607	1	unchanged	0.905558	0.221083	unchanged	-1.57745	0.00744792	Down
ENSMUSG00000004667	chr10	80035948	80039795	-	Polr2e	polymerase (RNA) II (DNA directed) polypeptide E [Source:MGI Symbol;Acc:MGI:1913670]	protein_coding	246.162	-0.662879	2.32118e-13	unchanged	0.100505	0.347689	unchanged	0.0894043	0.720328	unchanged	0.367718	0.000383831	unchanged	0.0685239	0.635399	unchanged	0.000147991	1	unchanged	-0.139923	0.336557	unchanged	-0.024894	0.90466	unchanged
ENSMUSG00000004668	chr11	9191941	9684259	+	Abca13	ATP-binding cassette, sub-family A (ABC1), member 13 [Source:MGI Symbol;Acc:MGI:2388707]	protein_coding	0.715845	0.0871085	0.967979	unchanged	1.13602	0.425436	unchanged	1.31948	NA	unchanged	0.775808	0.738068	unchanged	-1.67028	0.309792	unchanged	-0.608166	1	unchanged	-0.777824	NA	unchanged	-2.49346	NA	unchanged
ENSMUSG00000004677	chr8	71272713	71360713	+	Myo9b	myosin IXb [Source:MGI Symbol;Acc:MGI:106624]	protein_coding	15.6605	1.57965	2.22616e-07	Up	2.63441	3.23894e-20	Up	0.0657945	0.967442	unchanged	-0.486292	0.136454	unchanged	-0.428182	0.152939	unchanged	0.15109	1	unchanged	-0.567079	0.0468334	unchanged	-0.472248	0.0718632	unchanged
ENSMUSG00000004698	chr12	34047579	34917095	-	Hdac9	histone deacetylase 9 [Source:MGI Symbol;Acc:MGI:1931221]	protein_coding	0.1648	0	NA	unchanged	-0.86716	NA	unchanged	0	NA	unchanged	0	NA	unchanged	-0.423503	NA	unchanged	-1.03833	1	unchanged	0.821394	NA	unchanged	1.29274	NA	unchanged
ENSMUSG00000004748	chr11	4091479	4095445	-	Mtfp1	mitochondrial fission process 1 [Source:MGI Symbol;Acc:MGI:1916686]	protein_coding	8.9554	0.686641	0.0547569	unchanged	0.0815845	0.849909	unchanged	-0.323109	0.773724	unchanged	0.244005	0.599142	unchanged	0.241424	0.614576	unchanged	0.557933	1	unchanged	0.216394	0.709166	unchanged	0.600316	0.114158	unchanged
ENSMUSG00000004768	chr1	33719886	33742564	+	Rab23	RAB23, member RAS oncogene family [Source:MGI Symbol;Acc:MGI:99833]	protein_coding	12.302	-0.527439	0.103678	unchanged	-0.338671	0.280221	unchanged	-0.192182	0.844971	unchanged	-0.029725	0.973588	unchanged	-0.54355	0.221676	unchanged	-0.239962	1	unchanged	-0.0922589	0.886243	unchanged	-0.507684	0.229183	unchanged
ENSMUSG00000004771	chr9	64715298	64737758	-	Rab11a	RAB11A, member RAS oncogene family [Source:MGI Symbol;Acc:MGI:1858202]	protein_coding	157.948	0.480682	0.00141047	unchanged	-0.37805	0.0127036	unchanged	0.350857	0.153506	unchanged	0.22197	0.242922	unchanged	0.867102	8.21e-09	unchanged	0.257185	1	unchanged	0.202716	0.390694	unchanged	0.361872	0.0495851	unchanged
ENSMUSG00000004788	chr12	85219480	85226628	+	Eif2b2	eukaryotic translation initiation factor 2B, subunit 2 beta [Source:MGI Symbol;Acc:MGI:2145118]	protein_coding	56.4562	-1.40581	3.115e-26	Down	0.282442	0.0529146	unchanged	-0.171122	0.545482	unchanged	-0.106442	0.680032	unchanged	-0.593549	0.000219339	unchanged	-0.0170258	1	unchanged	-0.445177	0.0141573	unchanged	-0.228851	0.253179	unchanged
ENSMUSG00000004789	chr12	85110832	85134845	+	Dlst	dihydrolipoamide S-succinyltransferase (E2 component of 2-oxo-glutarate complex) [Source:MGI Symbol;Acc:MGI:1926170]	protein_coding	46.5904	0.848306	1.04439e-07	unchanged	0.257306	0.164039	unchanged	0.0701123	0.92183	unchanged	-0.117255	0.625577	unchanged	0.210974	0.313515	unchanged	0.153945	1	unchanged	-0.0377649	0.921389	unchanged	0.222721	0.312778	unchanged
ENSMUSG00000004791	chr12	85166634	85177790	-	Pgf	placental growth factor [Source:MGI Symbol;Acc:MGI:105095]	protein_coding	0.197791	-0.273563	NA	unchanged	0	NA	unchanged	-0.355442	NA	unchanged	0	NA	unchanged	0	NA	unchanged	0	1	unchanged	0	NA	unchanged	0	NA	unchanged
ENSMUSG00000004798	chr11	61775648	61855073	-	Ulk2	unc-51 like kinase 2 [Source:MGI Symbol;Acc:MGI:1352758]	protein_coding	5.22261	-0.401988	0.382597	unchanged	-1.142	0.00625725	Down	-0.339044	0.762831	unchanged	0.165437	0.820789	unchanged	-0.797916	0.119018	unchanged	-0.208307	1	unchanged	0.515457	0.489063	unchanged	1.20758	0.0265075	Up
ENSMUSG00000004815	chr5	108646692	108669672	-	Dgkq	diacylglycerol kinase, theta [Source:MGI Symbol;Acc:MGI:102918]	protein_coding	4.24215	0.0460552	0.951252	unchanged	-0.450889	0.316249	unchanged	-0.278336	0.869673	unchanged	-0.286197	0.706734	unchanged	-0.629127	0.334987	unchanged	0.120579	1	unchanged	-0.684858	0.355837	unchanged	-0.808089	0.169995	unchanged
ENSMUSG00000004843	chr16	65539127	65562726	-	Chmp2b	charged multivesicular body protein 2B [Source:MGI Symbol;Acc:MGI:1916192]	protein_coding	31.1628	0.7148	0.0271564	unchanged	0.0217471	0.96341	unchanged	-0.442168	0.565055	unchanged	-0.190317	0.701731	unchanged	1.19763	0.000152023	Up	0.447979	1	unchanged	0.626554	0.12853	unchanged	-0.277041	0.563718	unchanged
ENSMUSG00000004846	chr5	136987018	136996648	+	Plod3	procollagen-lysine, 2-oxoglutarate 5-dioxygenase 3 [Source:MGI Symbol;Acc:MGI:1347008]	protein_coding	14.2962	-0.78623	0.00989347	unchanged	0.504317	0.0969924	unchanged	0.110301	0.92183	unchanged	0.251304	0.596384	unchanged	-0.392033	0.390692	unchanged	-0.223382	1	unchanged	-0.427526	0.337717	unchanged	-0.160491	0.760542	unchanged
ENSMUSG00000004849	chr5	137034992	137046135	-	Ap1s1	adaptor protein complex AP-1, sigma 1 [Source:MGI Symbol;Acc:MGI:1098244]	protein_coding	38.239	-1.11092	7.83889e-10	Down	-0.317463	0.111435	unchanged	-0.00454803	1	unchanged	0.249433	0.356932	unchanged	0.465525	0.0479886	unchanged	0.169142	1	unchanged	0.122908	0.739611	unchanged	0.345429	0.168551	unchanged
ENSMUSG00000004864	chr17	28769296	28780233	+	Mapk13	mitogen-activated protein kinase 13 [Source:MGI Symbol;Acc:MGI:1346864]	protein_coding	11.8275	-0.0688034	0.886253	unchanged	1.05505	0.000178852	Up	0.0742989	0.957148	unchanged	0.174497	0.754463	unchanged	0.409572	0.375725	unchanged	0.0848754	1	unchanged	-0.0980822	0.855747	unchanged	-0.104264	0.858692	unchanged
ENSMUSG00000004865	chr17	28587647	28622709	-	Srpk1	serine/arginine-rich protein specific kinase 1 [Source:MGI Symbol;Acc:MGI:106908]	protein_coding	96.4442	-1.21821	2.48209e-16	Down	-1.77201	8.91359e-33	Down	0.322492	0.201774	unchanged	0.289642	0.151268	unchanged	0.135411	0.574221	unchanged	-0.179529	1	unchanged	-0.145792	0.644368	unchanged	-0.147161	0.605875	unchanged
ENSMUSG00000004880	chr1	181815334	181843046	-	Lbr	lamin B receptor [Source:MGI Symbol;Acc:MGI:2138281]	protein_coding	111.685	-0.697573	0.00111905	unchanged	-0.50343	0.0212338	unchanged	0.12057	0.875635	unchanged	0.280928	0.330196	unchanged	1.20314	4.83e-08	Up	-0.0516021	1	unchanged	0.323558	0.321083	unchanged	0.845435	0.000680789	unchanged
ENSMUSG00000004885	chr3	87948665	87953376	+	Crabp2	cellular retinoic acid binding protein II [Source:MGI Symbol;Acc:MGI:88491]	protein_coding	3.25095	2.5083	0.000993212	Up	2.45434	0.00221871	Up	-0.200677	0.960852	unchanged	-0.139906	0.899522	unchanged	-1.13652	0.227075	unchanged	0.0655829	1	unchanged	0.0719607	0.959889	unchanged	-0.581075	0.549308	unchanged
ENSMUSG00000004891	chr3	87971077	87980451	+	Nes	nestin [Source:MGI Symbol;Acc:MGI:101784]	protein_coding	6.812	2.72071	3.45615e-05	Up	5.13274	4.19546e-10	Up	-1.71621	0.401229	unchanged	-4.29637	1.85299e-06	Down	-5.96711	6.99e-13	Down	0.714666	1	unchanged	-1.71289	0.000924333	Down	-2.30788	1.62179e-07	Down
ENSMUSG00000004895	chr3	87858902	87885608	-	Prcc	papillary renal cell carcinoma (translocation-associated) [Source:MGI Symbol;Acc:MGI:2137738]	protein_coding	4.3165	2.35084	1.00116e-05	Up	1.14862	0.054706	unchanged	1.33387	0.14653	unchanged	0.159579	0.849471	unchanged	-1.55628	0.229615	unchanged	-0.477427	1	unchanged	-0.383042	0.7083	unchanged	-1.86429	0.147566	unchanged
ENSMUSG00000004896	chr3	87922600	87930717	-	Rrnad1	ribosomal RNA adenine dimethylase domain containing 1 [Source:MGI Symbol;Acc:MGI:2387197]	protein_coding	17.9017	-0.578372	0.0142945	unchanged	-0.279791	0.230896	unchanged	0.525633	0.0847294	unchanged	0.661595	0.0104967	unchanged	-0.033056	0.949153	unchanged	-0.0350503	1	unchanged	-0.0172697	0.974595	unchanged	-0.167195	0.684353	unchanged
ENSMUSG00000004897	chr3	87906320	87916132	+	Hdgf	heparin binding growth factor [Source:MGI Symbol;Acc:MGI:1194494]	protein_coding	692.669	-0.156965	0.30292	unchanged	-0.602527	3.14958e-06	unchanged	-0.0598874	0.90999	unchanged	0.375201	0.0121954	unchanged	0.811482	1.54e-09	unchanged	0.0127747	1	unchanged	-0.0223435	0.943491	unchanged	0.16967	0.385614	unchanged
ENSMUSG00000004902	chr6	120773577	120794336	+	Slc25a18	solute carrier family 25 (mitochondrial carrier), member 18 [Source:MGI Symbol;Acc:MGI:1919053]	protein_coding	1.20684	0.43996	0.67987	unchanged	1.6258	0.232519	unchanged	-0.730696	NA	unchanged	0.64891	0.573243	unchanged	0.605206	0.706666	unchanged	1.12977	1	unchanged	0.0827728	NA	unchanged	0.0492808	0.981117	unchanged
ENSMUSG00000004929	chr10	81070034	81082559	+	Thop1	thimet oligopeptidase 1 [Source:MGI Symbol;Acc:MGI:1354165]	protein_coding	33.1333	-0.753611	8.35558e-05	unchanged	-0.00301971	0.995879	unchanged	0.175588	0.708986	unchanged	0.576058	0.00967981	unchanged	0.164878	0.581364	unchanged	-0.104777	1	unchanged	-0.514231	0.0339639	unchanged	-0.514272	0.0401898	unchanged
ENSMUSG00000004931	chr10	81266959	81273246	+	Apba3	amyloid beta (A4) precursor protein-binding, family A, member 3 [Source:MGI Symbol;Acc:MGI:1888527]	protein_coding	84.5574	-0.659161	0.000123866	unchanged	0.20002	0.289626	unchanged	0.00963822	0.99979	unchanged	0.404155	0.0503229	unchanged	-0.823029	3.51e-06	unchanged	-0.0774453	1	unchanged	-0.279915	0.268248	unchanged	-0.384363	0.0703076	unchanged
ENSMUSG00000004933	chr10	81252934	81263365	+	Matk	megakaryocyte-associated tyrosine kinase [Source:MGI Symbol;Acc:MGI:99259]	protein_coding	0.523968	0.447782	0.848427	unchanged	0.575526	0.795344	unchanged	0	NA	unchanged	-0.301998	NA	unchanged	-0.78418	NA	unchanged	0.765026	1	unchanged	-0.621293	NA	unchanged	-0.871287	NA	unchanged
ENSMUSG00000004934	chr10	81153265	81167923	-	Pias4	protein inhibitor of activated STAT 4 [Source:MGI Symbol;Acc:MGI:2136940]	protein_coding	94.6956	-0.461096	0.0014862	unchanged	0.0229711	0.916948	unchanged	-0.057091	0.920974	unchanged	0.319867	0.0639826	unchanged	-0.0722206	0.748743	unchanged	0.101462	1	unchanged	-0.19155	0.410119	unchanged	-0.00407773	0.989808	unchanged
ENSMUSG00000004936	chr9	64185769	64253631	-	Map2k1	mitogen-activated protein kinase kinase 1 [Source:MGI Symbol;Acc:MGI:1346866]	protein_coding	151.05	0.0822263	0.646357	unchanged	0.866385	2.57416e-11	unchanged	0.536645	0.00230037	unchanged	0.11789	0.573243	unchanged	-0.401065	0.00550997	unchanged	-0.00452032	1	unchanged	0.0827744	0.745505	unchanged	-0.0176201	0.955374	unchanged
ENSMUSG00000004937	chr10	81044074	81060181	-	Sgta	small glutamine-rich tetratricopeptide repeat (TPR)-containing, alpha [Source:MGI Symbol;Acc:MGI:1098703]	protein_coding	126.575	-0.721605	1.15837e-10	unchanged	0.391148	0.000541088	unchanged	0.373516	0.0128875	unchanged	0.189606	0.220733	unchanged	0.593709	3.63e-06	unchanged	-0.0562408	1	unchanged	-0.121643	0.526145	unchanged	0.0488625	0.824686	unchanged
ENSMUSG00000004945	chr17	5410869	5440259	-	Tmem242	transmembrane protein 242 [Source:MGI Symbol;Acc:MGI:1917794]	protein_coding	21.4767	-0.60805	0.0035995	unchanged	0.0212194	0.945047	unchanged	-0.0912196	0.900892	unchanged	0.339311	0.214622	unchanged	0.613704	0.0171362	unchanged	-0.0262302	1	unchanged	0.115967	0.762112	unchanged	0.623715	0.0135891	unchanged
ENSMUSG00000004947	chr5	135994799	136032872	+	Dtx2	deltex 2, E3 ubiquitin ligase [Source:MGI Symbol;Acc:MGI:1921448]	protein_coding	31.6581	-1.39959	4.208e-10	Down	-0.253819	0.309318	unchanged	0.217703	0.695047	unchanged	0.238567	0.514258	unchanged	0.0604378	0.889275	unchanged	-0.266865	1	unchanged	-0.537237	0.0911171	unchanged	-0.543548	0.0814746	unchanged
ENSMUSG00000004948	chr5	135980098	135988624	+	Zp3	zona pellucida glycoprotein 3 [Source:MGI Symbol;Acc:MGI:99215]	protein_coding	5.8828	-2.21294	2.95507e-06	Down	-2.18689	5.53085e-05	Down	0.0563188	0.972733	unchanged	-1.38662	0.136475	unchanged	-1.86651	0.0730203	unchanged	-0.379616	1	unchanged	-0.792133	0.560938	unchanged	-2.36807	0.0261949	Down
ENSMUSG00000004951	chr5	135887918	135889563	+	Hspb1	heat shock protein 1 [Source:MGI Symbol;Acc:MGI:96240]	protein_coding	142.944	0.684648	0.199568	unchanged	2.75745	1.87055e-10	Up	-0.315195	0.863557	unchanged	-0.700956	0.266308	unchanged	-0.57783	0.277321	unchanged	-0.182102	1	unchanged	0.808739	0.186091	unchanged	-0.221412	0.776977	unchanged
ENSMUSG00000004952	chr5	136083915	136111860	+	Rasa4	RAS p21 protein activator 4 [Source:MGI Symbol;Acc:MGI:1858600]	protein_coding	2.42856	-2.5965	0.00759054	Down	-0.597649	0.535406	unchanged	0.129881	0.961488	unchanged	0.998709	0.538823	unchanged	-0.0628333	0.983152	unchanged	-0.181261	1	unchanged	0.26629	0.884811	unchanged	-0.144248	0.941143	unchanged
ENSMUSG00000004961	chr7	4539764	4547541	-	Syt5	synaptotagmin V [Source:MGI Symbol;Acc:MGI:1926368]	protein_coding	0.601858	-0.4734	0.784706	unchanged	-1.07149	0.470531	unchanged	0.0174372	NA	unchanged	0.670521	NA	unchanged	0.29784	0.888277	unchanged	-1.24266	1	unchanged	1.13214	NA	unchanged	1.57487	NA	unchanged
ENSMUSG00000004980	chr6	51460931	51469894	-	Hnrnpa2b1	heterogeneous nuclear ribonucleoprotein A2/B1 [Source:MGI Symbol;Acc:MGI:104819]	protein_coding	444.661	-0.335825	0.0151408	unchanged	-0.704393	4.60233e-08	unchanged	0.0290553	0.960069	unchanged	0.00462247	0.989661	unchanged	-0.355079	0.019051	unchanged	0.0828862	1	unchanged	0.211148	0.299522	unchanged	0.269142	0.123552	unchanged
ENSMUSG00000004988	chr6	117933558	117937692	-	Fxyd4	FXYD domain-containing ion transport regulator 4 [Source:MGI Symbol;Acc:MGI:1889005]	protein_coding	14.6636	-0.0805691	0.879541	unchanged	2.50495	3.99665e-10	Up	0.0129872	1	unchanged	-0.452453	0.392749	unchanged	-0.749594	0.0480543	unchanged	-0.391563	1	unchanged	-0.0635749	0.936941	unchanged	-0.617276	0.161134	unchanged
ENSMUSG00000004994	chr8	84257794	84270380	-	Ccdc130	coiled-coil domain containing 130 [Source:MGI Symbol;Acc:MGI:1914986]	protein_coding	11.5869	-1.02778	8.9822e-05	Down	-0.887016	0.001735	unchanged	-0.342504	0.525034	unchanged	0.812566	0.00768984	unchanged	-0.458018	0.18397	unchanged	0.0167931	1	unchanged	-0.638849	0.215968	unchanged	-0.0908701	0.88819	unchanged
ENSMUSG00000004996	chr8	84249905	84257326	-	Mri1	methylthioribose-1-phosphate isomerase 1 [Source:MGI Symbol;Acc:MGI:1915123]	protein_coding	36.3176	0.282241	0.33687	unchanged	1.40995	1.49487e-09	Up	-0.277408	0.691543	unchanged	-0.711853	0.0193971	unchanged	-0.454036	0.121241	unchanged	0.343829	1	unchanged	-0.0693126	0.886243	unchanged	-0.26465	0.431932	unchanged
ENSMUSG00000005034	chr3	146729573	146812990	-	Prkacb	protein kinase, cAMP dependent, catalytic, beta [Source:MGI Symbol;Acc:MGI:97594]	protein_coding	16.264	-0.114053	0.714538	unchanged	-0.204904	0.413323	unchanged	0.421359	0.305364	unchanged	0.0803457	0.861029	unchanged	-0.184618	0.635188	unchanged	-0.290227	1	unchanged	-0.192715	0.6484	unchanged	-0.0983698	0.834901	unchanged
ENSMUSG00000005043	chr11	119343424	119355536	-	Sgsh	N-sulfoglucosamine sulfohydrolase (sulfamidase) [Source:MGI Symbol;Acc:MGI:1350341]	protein_coding	1.33175	0.494974	0.624104	unchanged	0.632248	0.580965	unchanged	-0.161791	NA	unchanged	0.177327	0.900986	unchanged	0.530332	0.525946	unchanged	-0.200349	1	unchanged	-0.892028	0.628769	unchanged	-0.42937	0.756803	unchanged
ENSMUSG00000005045	chr4	152338650	152390194	+	Chd5	chromodomain helicase DNA binding protein 5 [Source:MGI Symbol;Acc:MGI:3036258]	protein_coding	1.01003	-2.36626	0.0187106	Down	-0.938789	0.445514	unchanged	0.00341877	NA	unchanged	0.629333	0.734144	unchanged	-0.0628333	0.983152	unchanged	-0.108068	1	unchanged	0.411519	NA	unchanged	-1.51715	0.313482	unchanged
ENSMUSG00000005054	chr10	78425668	78427622	+	Cstb	cystatin B [Source:MGI Symbol;Acc:MGI:109514]	protein_coding	468.973	-0.800098	0.000275938	unchanged	0.341163	0.155843	unchanged	0.185104	0.776611	unchanged	1.03497	6.60236e-06	Up	1.66021	8.83e-15	Up	0.559096	1	unchanged	0.517784	0.0773663	unchanged	-0.0607848	0.895737	unchanged
ENSMUSG00000005057	chr5	136218146	136246556	-	Sh2b2	SH2B adaptor protein 2 [Source:MGI Symbol;Acc:MGI:1345171]	protein_coding	6.49353	0.577921	0.243207	unchanged	1.25254	0.0061023	Up	-0.0784486	0.969711	unchanged	-0.505259	0.41189	unchanged	-0.989418	0.0624458	unchanged	-0.232918	1	unchanged	-1.25467	0.0353975	Down	-0.702955	0.304368	unchanged
ENSMUSG00000005069	chr6	124396815	124415067	-	Pex5	peroxisomal biogenesis factor 5 [Source:MGI Symbol;Acc:MGI:1098808]	protein_coding	42.0041	0.452089	0.0420943	unchanged	0.221532	0.347689	unchanged	0.20753	0.72459	unchanged	0.799755	0.000143652	unchanged	1.22915	1.2e-09	Up	-0.176094	1	unchanged	0.248747	0.451683	unchanged	0.177834	0.603889	unchanged
ENSMUSG00000005078	chr12	72085588	72101461	+	Jkamp	JNK1/MAPK8-associated membrane protein [Source:MGI Symbol;Acc:MGI:1915057]	protein_coding	74.7847	0.481359	0.00350164	unchanged	0.888997	4.06569e-09	unchanged	-0.326394	0.30261	unchanged	-0.0499593	0.868255	unchanged	-0.541873	0.00127002	unchanged	-0.0654983	1	unchanged	-0.406845	0.0428872	unchanged	-0.323038	0.108229	unchanged
ENSMUSG00000005102	chr2	118388617	118475234	+	Eif2ak4	eukaryotic translation initiation factor 2 alpha kinase 4 [Source:MGI Symbol;Acc:MGI:1353427]	protein_coding	8.19042	0.492141	0.233622	unchanged	2.75388	4.87067e-08	Up	-1.7257	0.00995726	Down	-1.87239	0.000140918	Down	-1.12967	0.0160926	Down	1.36036	1	unchanged	-0.253218	0.712213	unchanged	-0.611366	0.206428	unchanged
ENSMUSG00000005103	chr5	38526812	38563221	-	Wdr1	WD repeat domain 1 [Source:MGI Symbol;Acc:MGI:1337100]	protein_coding	189.37	1.68603	1.90056e-16	Up	2.15815	1.59172e-27	Up	0.0625522	0.947086	unchanged	-0.777498	0.000606422	unchanged	0.302703	0.216851	unchanged	0.240072	1	unchanged	0.278184	0.383614	unchanged	-0.276149	0.337498	unchanged
ENSMUSG00000005125	chr15	66929317	66969640	-	Ndrg1	N-myc downstream regulated gene 1 [Source:MGI Symbol;Acc:MGI:1341799]	protein_coding	36.6881	1.87126	0.0218088	Up	2.04367	0.0116459	Up	-0.333565	0.922032	unchanged	1.91534	0.0233371	Up	2.92108	8.74e-05	Up	0.0377013	1	unchanged	0.882184	0.470134	unchanged	-1.00228	0.332507	unchanged
ENSMUSG00000005131	chr9	53402324	53434402	+	4930550C14Rik	RIKEN cDNA 4930550C14 gene [Source:MGI Symbol;Acc:MGI:1922561]	protein_coding	0.790539	-0.378592	0.812313	unchanged	-1.12426	0.412827	unchanged	-0.0112804	NA	unchanged	-1.36066	0.440823	unchanged	1.41465	0.348394	unchanged	0.0512909	1	unchanged	1.01774	NA	unchanged	0.443037	0.842854	unchanged
ENSMUSG00000005142	chr8	85083269	85098282	+	Man2b1	mannosidase 2, alpha B1 [Source:MGI Symbol;Acc:MGI:107286]	protein_coding	28.8705	0.268074	0.292644	unchanged	0.210722	0.411294	unchanged	-0.246382	0.68224	unchanged	-0.818257	0.00139957	unchanged	-0.0586633	0.89049	unchanged	-0.0221777	1	unchanged	-0.592617	0.049238	unchanged	-0.226121	0.534194	unchanged
ENSMUSG00000005148	chr14	99298690	99315036	+	Klf5	Kruppel-like factor 5 [Source:MGI Symbol;Acc:MGI:1338056]	protein_coding	762.844	0.866982	2.62033e-07	unchanged	-0.0898524	0.683053	unchanged	0.201471	0.644367	unchanged	-0.24015	0.292067	unchanged	1.01043	3.84e-09	Up	-0.162981	1	unchanged	0.622193	0.00237693	unchanged	0.53322	0.00792459	unchanged
ENSMUSG00000005150	chr8	85075034	85081306	-	Wdr83	WD repeat domain containing 83 [Source:MGI Symbol;Acc:MGI:1915086]	protein_coding	9.13051	0.118131	0.762721	unchanged	-0.543589	0.0850436	unchanged	0.5262	0.299837	unchanged	0.10321	0.847004	unchanged	-0.34507	0.440372	unchanged	0.170292	1	unchanged	-0.120313	0.860214	unchanged	0.761205	0.0689678	unchanged
ENSMUSG00000005161	chr8	84969586	84974834	+	Prdx2	peroxiredoxin 2 [Source:MGI Symbol;Acc:MGI:109486]	protein_coding	153.455	0.798428	4.081e-05	unchanged	1.79654	7.51916e-23	Up	0.165649	0.783701	unchanged	-0.43903	0.0568621	unchanged	-0.239318	0.307717	unchanged	-0.126374	1	unchanged	-0.210957	0.494908	unchanged	-0.310814	0.213517	unchanged
ENSMUSG00000005198	chr11	69733996	69758637	-	Polr2a	polymerase (RNA) II (DNA directed) polypeptide A [Source:MGI Symbol;Acc:MGI:98086]	protein_coding	152.275	0.771561	2.33255e-06	unchanged	0.436379	0.009295	unchanged	-0.14889	0.767932	unchanged	-0.0368368	0.905679	unchanged	-0.446801	0.0139751	unchanged	0.124514	1	unchanged	-0.162119	0.568152	unchanged	-0.158029	0.548766	unchanged
ENSMUSG00000005202	chr11	69614803	69617905	-	Shbg	sex hormone binding globulin [Source:MGI Symbol;Acc:MGI:98295]	protein_coding	0.422266	-3.82473	0.105859	unchanged	-3.14564	0.19342	unchanged	-0.891191	NA	unchanged	0	NA	unchanged	0	NA	unchanged	-1.08077	1	unchanged	0	NA	unchanged	0	NA	unchanged
ENSMUSG00000005204	chr11	69673114	69682084	-	Senp3	SUMO/sentrin specific peptidase 3 [Source:MGI Symbol;Acc:MGI:2158736]	protein_coding	98.3316	-0.117477	0.502325	unchanged	0.027969	0.894955	unchanged	-0.133907	0.744888	unchanged	-0.871664	3.02563e-08	unchanged	-0.474732	0.00362614	unchanged	0.0426462	1	unchanged	-0.367959	0.0541625	unchanged	-0.379514	0.0368235	unchanged
ENSMUSG00000005225	chr6	54595110	54645839	+	Plekha8	pleckstrin homology domain containing, family A (phosphoinositide binding specific) member 8 [Source:MGI Symbol;Acc:MGI:2681164]	protein_coding	11.5322	0.0613107	0.906203	unchanged	-0.0987524	0.82942	unchanged	0.361661	0.687971	unchanged	-0.0876885	0.899496	unchanged	0.0718471	0.900368	unchanged	-0.431704	1	unchanged	0.271497	0.658219	unchanged	0.243249	0.676703	unchanged
ENSMUSG00000005233	chr2	69193894	69206194	-	Spc25	SPC25, NDC80 kinetochore complex component, homolog (S. cerevisiae) [Source:MGI Symbol;Acc:MGI:1913692]	protein_coding	23.441	-0.0851154	0.804312	unchanged	-1.2866	3.03556e-08	Down	0.063007	0.951123	unchanged	0.344403	0.283879	unchanged	0.58332	0.0537906	unchanged	-0.372346	1	unchanged	0.0482144	0.938143	unchanged	0.160831	0.734715	unchanged
ENSMUSG00000005237	chr11	69420808	69549110	-	Dnah2	dynein, axonemal, heavy chain 2 [Source:MGI Symbol;Acc:MGI:107731]	protein_coding	5.90674	-1.05947	0.0500757	unchanged	-0.691431	0.171696	unchanged	-0.238725	0.891235	unchanged	1.41354	0.0133731	Up	0.761019	0.154092	unchanged	-0.0676235	1	unchanged	0.121534	0.910002	unchanged	0.0806118	0.939435	unchanged
ENSMUSG00000005251	chr16	97741932	97763787	-	Ripk4	receptor-interacting serine-threonine kinase 4 [Source:MGI Symbol;Acc:MGI:1919638]	protein_coding	7.56779	-0.322559	0.55935	unchanged	-0.407902	0.369419	unchanged	0.294376	0.830863	unchanged	-0.224935	0.784133	unchanged	0.224537	0.753382	unchanged	-0.141253	1	unchanged	-0.57994	0.411406	unchanged	-1.16057	0.0480441	Down
ENSMUSG00000005262	chr16	18811778	18835261	+	Ufd1	ubiquitin recognition factor in ER-associated degradation 1 [Source:MGI Symbol;Acc:MGI:109353]	protein_coding	102.46	0.47647	8.34971e-05	unchanged	-0.781936	2.71633e-11	unchanged	0.271918	0.198012	unchanged	0.439778	0.00050073	unchanged	0.159062	0.396288	unchanged	0.00676984	1	unchanged	0.0653334	0.798632	unchanged	0.260357	0.133454	unchanged
ENSMUSG00000005268	chr15	10177237	10349180	+	Prlr	prolactin receptor [Source:MGI Symbol;Acc:MGI:97763]	protein_coding	0.640575	-0.634238	0.762217	unchanged	-1.24869	0.481986	unchanged	0.405857	NA	unchanged	0.0586749	0.988172	unchanged	-0.423507	0.868774	unchanged	-0.000986288	1	unchanged	0.8214	NA	unchanged	0	NA	unchanged
ENSMUSG00000005299	chr5	33739672	33782817	-	Letm1	leucine zipper-EF-hand containing transmembrane protein 1 [Source:MGI Symbol;Acc:MGI:1932557]	protein_coding	38.1042	-0.293126	0.126121	unchanged	-1.27901	3.63575e-13	Down	0.131652	0.807	unchanged	0.0683467	0.837236	unchanged	0.26345	0.309528	unchanged	-0.250122	1	unchanged	0.0483698	0.915836	unchanged	-0.449755	0.106946	unchanged
ENSMUSG00000005312	chr13	58176155	58215653	-	Ubqln1	ubiquilin 1 [Source:MGI Symbol;Acc:MGI:1860276]	protein_coding	114.187	0.889618	9.21689e-13	unchanged	-0.347303	0.0067119	unchanged	0.25189	0.318005	unchanged	0.204662	0.187761	unchanged	0.633041	2.48e-06	unchanged	0.0607743	1	unchanged	0.296617	0.0844315	unchanged	0.511386	0.000291567	unchanged
ENSMUSG00000005320	chr13	55152639	55168759	+	Fgfr4	fibroblast growth factor receptor 4 [Source:MGI Symbol;Acc:MGI:95525]	protein_coding	4.86214	-3.07179	2.95752e-08	Down	-2.84995	2.04432e-05	Down	0.686133	0.35151	unchanged	1.22505	0.107649	unchanged	2.02067	0.00235863	Up	-0.0191302	1	unchanged	0.28884	0.868687	unchanged	-1.22549	0.287907	unchanged
ENSMUSG00000005354	chr15	77915046	77929006	-	Txn2	thioredoxin 2 [Source:MGI Symbol;Acc:MGI:1929468]	protein_coding	190.527	-1.60019	1.097e-31	Down	0.195471	0.203473	unchanged	0.110231	0.792593	unchanged	0.56683	0.000431929	unchanged	0.784125	2.13e-08	unchanged	-0.302325	1	unchanged	0.13436	0.576277	unchanged	-0.0459701	0.87273	unchanged
ENSMUSG00000005360	chr15	8634123	8710764	-	Slc1a3	solute carrier family 1 (glial high affinity glutamate transporter), member 3 [Source:MGI Symbol;Acc:MGI:99917]	protein_coding	2.62202	3.48512	0.000255985	Up	3.46242	0.000107583	Up	-0.355445	0.943145	unchanged	-2.61799	0.0158556	Down	-2.69741	0.00870258	Down	-1.40143	1	unchanged	1.29642	0.0448784	Up	0.673969	0.364862	unchanged
ENSMUSG00000005362	chr6	106780200	106800077	-	Crbn	cereblon [Source:MGI Symbol;Acc:MGI:1913277]	protein_coding	20.2564	-0.0980905	0.731424	unchanged	-0.264908	0.271739	unchanged	0.147674	0.828853	unchanged	-0.04787	0.90924	unchanged	-0.465392	0.089101	unchanged	0.31331	1	unchanged	-0.241835	0.544928	unchanged	-0.520499	0.103659	unchanged
ENSMUSG00000005370	chr17	87975061	87990892	+	Msh6	mutS homolog 6 [Source:MGI Symbol;Acc:MGI:1343961]	protein_coding	208.311	2.64868	2.85432e-90	Up	0.579086	6.00289e-06	unchanged	-0.0673315	0.916888	unchanged	-0.965012	2.94546e-14	unchanged	-1.63761	3.48e-34	Down	-0.188741	1	unchanged	-0.577862	0.000117588	unchanged	-0.593298	2.14639e-05	unchanged
ENSMUSG00000005371	chr17	87990858	88065291	-	Fbxo11	F-box protein 11 [Source:MGI Symbol;Acc:MGI:2147134]	protein_coding	77.7088	0.64321	4.283e-05	unchanged	0.348756	0.0266399	unchanged	0.107548	0.851629	unchanged	0.193098	0.350122	unchanged	0.239062	0.23397	unchanged	-0.197523	1	unchanged	0.0802827	0.787933	unchanged	0.00601668	0.985514	unchanged
ENSMUSG00000005373	chr5	135089889	135138382	+	Mlxipl	MLX interacting protein-like [Source:MGI Symbol;Acc:MGI:1927999]	protein_coding	10.2522	1.97476	0.00140934	Up	1.40322	0.0121529	Up	-1.01157	0.593781	unchanged	-2.06067	0.00306072	Down	-2.35978	0.00931263	Down	-0.713717	1	unchanged	2.15706	7.37442e-05	Up	3.34679	4.67611e-11	Up
ENSMUSG00000005374	chr5	135149656	135165760	+	Tbl2	transducin (beta)-like 2 [Source:MGI Symbol;Acc:MGI:1351652]	protein_coding	16.6822	-1.14682	2.09657e-06	Down	-1.37105	3.16039e-08	Down	-0.0556623	0.951512	unchanged	0.450297	0.175027	unchanged	-0.309527	0.405453	unchanged	0.105731	1	unchanged	-0.322688	0.545879	unchanged	-0.0596378	0.928941	unchanged
ENSMUSG00000005378	chr5	135052956	135064959	-	Bud23	BUD23, rRNA methyltransferase and ribosome maturation factor [Source:MGI Symbol;Acc:MGI:1913388]	protein_coding	71.5872	-0.168595	0.355144	unchanged	-0.90607	1.48359e-09	unchanged	0.0404962	0.950728	unchanged	-0.101479	0.695976	unchanged	-0.324946	0.113078	unchanged	0.0309699	1	unchanged	-0.33202	0.16497	unchanged	-0.132713	0.641379	unchanged
ENSMUSG00000005397	chr13	13437550	13512269	+	Nid1	nidogen 1 [Source:MGI Symbol;Acc:MGI:97342]	protein_coding	105.338	0.865823	0.000490053	unchanged	-0.104506	0.744372	unchanged	-0.352318	0.549156	unchanged	-0.54401	0.0633038	unchanged	-0.833585	0.00144301	unchanged	-0.294775	1	unchanged	0.0280436	0.962683	unchanged	-0.874663	0.00188665	unchanged
ENSMUSG00000005410	chr8	75109568	75128439	+	Mcm5	minichromosome maintenance complex component 5 [Source:MGI Symbol;Acc:MGI:103197]	protein_coding	202.899	0.272984	0.0892589	unchanged	0.899207	5.09571e-10	unchanged	0.130466	0.765808	unchanged	-0.835221	8.37863e-08	unchanged	-0.515467	0.00175377	unchanged	0.177375	1	unchanged	0.0945669	0.739747	unchanged	0.1875	0.379459	unchanged
ENSMUSG00000005413	chr8	75093620	75100589	+	Hmox1	heme oxygenase 1 [Source:MGI Symbol;Acc:MGI:96163]	protein_coding	5.905	1.15418	0.164542	unchanged	-1.25668	0.123792	unchanged	1.15438	0.475246	unchanged	-0.782401	0.446998	unchanged	-0.69396	0.624656	unchanged	0.638661	1	unchanged	-0.74186	0.687439	unchanged	-2.08839	0.106997	unchanged
ENSMUSG00000005417	chr11	59661304	59780860	+	Mprip	myosin phosphatase Rho interacting protein [Source:MGI Symbol;Acc:MGI:1349438]	protein_coding	88.2353	-0.272222	0.161753	unchanged	-0.596148	0.000473434	unchanged	-0.402184	0.1776	unchanged	-0.0940928	0.757612	unchanged	0.21573	0.33623	unchanged	-0.258107	1	unchanged	0.362008	0.133942	unchanged	0.248639	0.308478	unchanged
ENSMUSG00000005442	chr7	25267703	25294159	+	Cic	capicua transcriptional repressor [Source:MGI Symbol;Acc:MGI:1918972]	protein_coding	43.3063	1.31369	7.27886e-11	Up	1.23345	1.17006e-09	Up	-0.175716	0.809163	unchanged	-1.41704	4.03309e-11	Down	-0.966123	4.61e-06	unchanged	-0.0725189	1	unchanged	-0.877288	0.000262318	unchanged	-0.785987	0.00040458	unchanged
ENSMUSG00000005447	chr7	25295048	25297986	-	Pafah1b3	platelet-activating factor acetylhydrolase, isoform 1b, subunit 3 [Source:MGI Symbol;Acc:MGI:108414]	protein_coding	52.9419	-1.26521	1.86369e-14	Down	-0.350223	0.0395378	unchanged	0.131385	0.772023	unchanged	0.136676	0.642632	unchanged	-0.329946	0.101832	unchanged	0.0594405	1	unchanged	0.255921	0.31491	unchanged	0.0320065	0.934089	unchanged
ENSMUSG00000005465	chr8	84030293	84042589	-	Il27ra	interleukin 27 receptor, alpha [Source:MGI Symbol;Acc:MGI:1355318]	protein_coding	0.154326	-0.273563	NA	unchanged	-0.145819	NA	unchanged	-0.355442	NA	unchanged	0	NA	unchanged	0	NA	unchanged	-0.316991	1	unchanged	0	NA	unchanged	0	NA	unchanged
ENSMUSG00000005469	chr8	83972992	83996443	+	Prkaca	protein kinase, cAMP dependent, catalytic, alpha [Source:MGI Symbol;Acc:MGI:97592]	protein_coding	56.9986	1.48468	1.8461e-09	Up	2.46455	1.58203e-28	Up	-0.305379	0.693609	unchanged	-0.211821	0.538544	unchanged	0.515971	0.0276693	unchanged	-0.0311151	1	unchanged	0.455453	0.0990339	unchanged	0.473513	0.0629765	unchanged
ENSMUSG00000005470	chr8	83955506	83970197	+	Asf1b	anti-silencing function 1B histone chaperone [Source:MGI Symbol;Acc:MGI:1914179]	protein_coding	31.5741	-1.24668	7.2532e-13	Down	-1.65057	1.27123e-21	Down	0.0946761	0.869673	unchanged	0.177542	0.554022	unchanged	0.0196026	0.966086	unchanged	0.170315	1	unchanged	-0.0544101	0.908575	unchanged	0.0392968	0.938595	unchanged
ENSMUSG00000005481	chr8	83715176	83726892	+	Ddx39	DEAD (Asp-Glu-Ala-Asp) box polypeptide 39 [Source:MGI Symbol;Acc:MGI:1915528]	protein_coding	296.089	-0.0489902	0.742879	unchanged	-0.511	2.35988e-06	unchanged	0.279644	0.110961	unchanged	0.272787	0.0344492	unchanged	0.193534	0.170122	unchanged	0.0510008	1	unchanged	-0.122079	0.524434	unchanged	0.164177	0.306561	unchanged
ENSMUSG00000005483	chr8	83608192	83612653	+	Dnajb1	DnaJ heat shock protein family (Hsp40) member B1 [Source:MGI Symbol;Acc:MGI:1931874]	protein_coding	101.872	0.06294	0.767642	unchanged	-0.323291	0.0409353	unchanged	0.18374	0.632332	unchanged	-0.439331	0.015701	unchanged	-0.80061	1.28e-06	unchanged	0.115071	1	unchanged	-0.533229	0.00575775	unchanged	-0.897082	4.84657e-08	unchanged
ENSMUSG00000005493	chr3	153857148	153906138	-	Msh4	mutS homolog 4 [Source:MGI Symbol;Acc:MGI:1860077]	protein_coding	0.634807	-2.80797	0.0145478	Down	-1.67039	0.194152	unchanged	0.914113	NA	unchanged	1.1407	0.549424	unchanged	1.22436	0.431067	unchanged	1.59117	1	unchanged	0.460727	NA	unchanged	0.210733	NA	unchanged
ENSMUSG00000005501	chr1	87945118	88008551	-	Usp40	ubiquitin specific peptidase 40 [Source:MGI Symbol;Acc:MGI:2443184]	protein_coding	4.56667	0.584463	0.255956	unchanged	0.391567	0.446003	unchanged	-0.946057	0.386357	unchanged	0.157798	0.840952	unchanged	0.274722	0.721711	unchanged	0.00602392	1	unchanged	0.096143	0.920747	unchanged	0.704946	0.245938	unchanged
ENSMUSG00000005503	chr6	52313497	52318378	+	Evx1	even-skipped homeobox 1 [Source:MGI Symbol;Acc:MGI:95461]	protein_coding	1.25049	-0.473284	0.772684	unchanged	-0.890513	0.530789	unchanged	1.33585	NA	unchanged	1.03379	0.544938	unchanged	-0.874827	0.582893	unchanged	0.781543	1	unchanged	1.75669	NA	unchanged	-0.417085	0.785377	unchanged
ENSMUSG00000005505	chr2	90904739	90911626	+	Kbtbd4	kelch repeat and BTB (POZ) domain containing 4 [Source:MGI Symbol;Acc:MGI:1914386]	protein_coding	15.2816	-0.946682	1.31789e-05	unchanged	-0.804702	0.00085738	unchanged	0.00588307	1	unchanged	0.103624	0.809608	unchanged	0.415451	0.249864	unchanged	-0.0323652	1	unchanged	0.422866	0.274981	unchanged	0.039427	0.952002	unchanged
ENSMUSG00000005506	chr2	90940381	91019497	+	Celf1	CUGBP, Elav-like family member 1 [Source:MGI Symbol;Acc:MGI:1342295]	protein_coding	178.728	0.451113	1.4616e-06	unchanged	0.224883	0.0175799	unchanged	-0.0329263	0.935145	unchanged	-0.227678	0.0405459	unchanged	0.0708147	0.64508	unchanged	-0.0190365	1	unchanged	-0.00527787	0.980018	unchanged	-0.0501764	0.785492	unchanged
ENSMUSG00000005510	chr2	90894633	90904827	-	Ndufs3	NADH:ubiquinone oxidoreductase core subunit S3 [Source:MGI Symbol;Acc:MGI:1915599]	protein_coding	111.906	-0.066571	0.675412	unchanged	0.336742	0.00390252	unchanged	0.143806	0.626358	unchanged	0.0734206	0.717675	unchanged	0.173297	0.241516	unchanged	0.0692881	1	unchanged	-0.0956356	0.649692	unchanged	0.244914	0.0979011	unchanged
ENSMUSG00000005514	chr5	135670032	135735326	+	Por	P450 (cytochrome) oxidoreductase [Source:MGI Symbol;Acc:MGI:97744]	protein_coding	57.4852	-1.43848	1.4474e-13	Down	-0.191356	0.395238	unchanged	0.278107	0.495683	unchanged	0.910411	3.27972e-05	unchanged	0.872915	3.3e-05	unchanged	-0.0845175	1	unchanged	-0.346629	0.24413	unchanged	-0.0907753	0.813638	unchanged
ENSMUSG00000005533	chr7	67952826	68233668	+	Igf1r	insulin-like growth factor I receptor [Source:MGI Symbol;Acc:MGI:96433]	protein_coding	4.38855	0.300644	0.821178	unchanged	0.581307	0.45989	unchanged	0.220236	0.957067	unchanged	-2.18149	0.0858728	unchanged	-1.62507	0.0839005	unchanged	-0.313188	1	unchanged	-0.379327	0.77608	unchanged	-0.557435	0.561732	unchanged
ENSMUSG00000005534	chr8	3122060	3279617	-	Insr	insulin receptor [Source:MGI Symbol;Acc:MGI:96575]	protein_coding	4.82823	2.96904	5.499e-06	Up	2.73414	2.38668e-06	Up	-0.413466	0.909491	unchanged	-0.93665	0.0914286	unchanged	-0.497816	0.416493	unchanged	0.844822	1	unchanged	0.319545	0.660325	unchanged	0.325096	0.645443	unchanged
ENSMUSG00000005553	chr7	30712208	30725534	+	Atp4a	ATPase, H+/K+ exchanging, gastric, alpha polypeptide [Source:MGI Symbol;Acc:MGI:88113]	protein_coding	1.07304	0.451714	0.799591	unchanged	1.84856	0.156635	unchanged	-0.355445	NA	unchanged	0.0643359	0.98742	unchanged	-0.423507	0.837994	unchanged	0.404353	1	unchanged	3.16387	NA	unchanged	1.85561	0.0994696	unchanged
ENSMUSG00000005566	chr7	12999113	13031035	+	Trim28	tripartite motif-containing 28 [Source:MGI Symbol;Acc:MGI:109274]	protein_coding	768.477	0.659354	8.80301e-06	unchanged	0.772718	1.19484e-07	unchanged	-0.29159	0.301687	unchanged	-0.323781	0.0709748	unchanged	-0.700527	5.23e-06	unchanged	-0.24671	1	unchanged	-0.0907903	0.755726	unchanged	0.109639	0.666735	unchanged
ENSMUSG00000005575	chr7	13035119	13038275	-	Ube2m	ubiquitin-conjugating enzyme E2M [Source:MGI Symbol;Acc:MGI:108278]	protein_coding	128.142	0.154015	0.392029	unchanged	0.679634	6.34683e-06	unchanged	0.130903	0.771659	unchanged	0.481093	0.00369675	unchanged	0.159421	0.405637	unchanged	0.0679261	1	unchanged	0.113673	0.687256	unchanged	0.373197	0.0496029	unchanged
ENSMUSG00000005580	chr16	4287528	4420498	-	Adcy9	adenylate cyclase 9 [Source:MGI Symbol;Acc:MGI:108450]	protein_coding	2.85937	0.308802	0.656176	unchanged	1.76473	0.00177562	Up	-0.137441	0.954616	unchanged	0.965096	0.097617	unchanged	1.54408	0.0418194	Up	0.709666	1	unchanged	-0.576098	0.476638	unchanged	-0.175731	0.89965	unchanged
ENSMUSG00000005609	chr7	111028950	111056377	+	Ctr9	CTR9 homolog, Paf1/RNA polymerase II complex component [Source:MGI Symbol;Acc:MGI:109345]	protein_coding	26.1345	0.837959	1.37841e-05	unchanged	0.0137565	0.966039	unchanged	0.183639	0.759616	unchanged	0.139111	0.616831	unchanged	0.273746	0.310882	unchanged	-0.0336403	1	unchanged	-0.127528	0.76014	unchanged	0.208724	0.511525	unchanged
ENSMUSG00000005610	chr7	111067749	111083030	-	Eif4g2	eukaryotic translation initiation factor 4, gamma 2 [Source:MGI Symbol;Acc:MGI:109207]	protein_coding	590.168	-0.656947	5.10163e-10	unchanged	-0.554833	1.30001e-07	unchanged	0.089672	0.783985	unchanged	0.258973	0.0453785	unchanged	0.283121	0.0202267	unchanged	-0.0699399	1	unchanged	0.209719	0.177753	unchanged	0.127426	0.444638	unchanged
ENSMUSG00000005615	chr16	32430920	32475070	+	Pcyt1a	phosphate cytidylyltransferase 1, choline, alpha isoform [Source:MGI Symbol;Acc:MGI:88557]	protein_coding	25.533	-0.238279	0.238131	unchanged	-0.75051	2.37943e-05	unchanged	0.145612	0.773724	unchanged	0.147829	0.597579	unchanged	0.81699	0.000694283	unchanged	-0.0518925	1	unchanged	0.254943	0.409263	unchanged	0.416556	0.13128	unchanged
ENSMUSG00000005621	chr7	80993680	81045164	+	Zfp592	zinc finger protein 592 [Source:MGI Symbol;Acc:MGI:2443541]	protein_coding	21.2923	0.610075	0.0123833	unchanged	0.227211	0.366706	unchanged	-0.165382	0.856108	unchanged	0.301583	0.295553	unchanged	0.0911553	0.814755	unchanged	0.0572837	1	unchanged	0.263604	0.44835	unchanged	0.50494	0.0553758	unchanged
ENSMUSG00000005625	chr3	95032693	95042614	-	Psmd4	proteasome (prosome, macropain) 26S subunit, non-ATPase, 4 [Source:MGI Symbol;Acc:MGI:1201670]	protein_coding	106.958	1.04253	7.02788e-11	Up	1.22619	7.50026e-15	Up	0.271203	0.450331	unchanged	0.145007	0.542223	unchanged	0.473993	0.00774513	unchanged	0.11265	1	unchanged	-0.0781402	0.807019	unchanged	0.148919	0.556259	unchanged
ENSMUSG00000005656	chr12	54746348	54795703	-	Snx6	sorting nexin 6 [Source:MGI Symbol;Acc:MGI:1919433]	protein_coding	140.718	0.534647	3.77767e-06	unchanged	-0.0427189	0.790574	unchanged	0.0947427	0.801765	unchanged	0.526203	8.65882e-06	unchanged	0.609596	1.06e-06	unchanged	0.0114717	1	unchanged	0.43218	0.00238772	unchanged	0.86911	2.69359e-12	unchanged
ENSMUSG00000005667	chr6	83305690	83325908	-	Mthfd2	methylenetetrahydrofolate dehydrogenase (NAD+ dependent), methenyltetrahydrofolate cyclohydrolase [Source:MGI Symbol;Acc:MGI:1338850]	protein_coding	47.8463	1.353	8.89288e-05	Up	0.713044	0.0376304	unchanged	-0.805045	0.233439	unchanged	-1.62845	1.23151e-05	Down	-3.31839	1.68e-20	Down	-0.0463313	1	unchanged	-1.09878	0.00741196	Down	-1.62254	3.21223e-06	Down
ENSMUSG00000005672	chr5	75574915	75656722	+	Kit	KIT proto-oncogene receptor tyrosine kinase [Source:MGI Symbol;Acc:MGI:96677]	protein_coding	8.64803	0.963833	0.35144	unchanged	0.174764	0.864294	unchanged	0.80225	0.759568	unchanged	-2.71824	0.0212185	Down	-6.52241	1.4e-12	Down	-0.388731	1	unchanged	0.494065	0.704184	unchanged	-2.55108	0.000581901	Down
ENSMUSG00000005674	chr1	171216010	171222514	-	Tomm40l	translocase of outer mitochondrial membrane 40-like [Source:MGI Symbol;Acc:MGI:3589112]	protein_coding	5.28171	2.75071	0.000151305	Up	2.80656	9.87043e-05	Up	-0.582318	0.878406	unchanged	-1.10618	0.0678564	unchanged	-1.37712	0.0325178	Down	-0.896141	1	unchanged	-0.271551	0.757168	unchanged	-1.07495	0.0276068	Down
ENSMUSG00000005681	chr1	171225053	171226379	+	Apoa2	apolipoprotein A-II [Source:MGI Symbol;Acc:MGI:88050]	protein_coding	2.57465	0	1	unchanged	1.29687	0.582006	unchanged	0	1	unchanged	0.419348	0.908973	unchanged	1.71147	0.478198	unchanged	0	1	unchanged	0.100054	0.982622	unchanged	-1.30462	0.669461	unchanged
ENSMUSG00000005682	chr10	128303334	128321358	+	Pan2	PAN2 poly(A) specific ribonuclease subunit [Source:MGI Symbol;Acc:MGI:1918984]	protein_coding	40.4503	-0.53406	0.00221571	unchanged	0.0184418	0.942511	unchanged	-0.235545	0.528936	unchanged	0.486161	0.0143233	unchanged	0.322133	0.110578	unchanged	0.347115	1	unchanged	0.0411351	0.908575	unchanged	0.0203727	0.956198	unchanged
ENSMUSG00000005683	chr10	128337733	128362479	+	Cs	citrate synthase [Source:MGI Symbol;Acc:MGI:88529]	protein_coding	182.717	0.703911	2.34919e-08	unchanged	0.38802	0.00188032	unchanged	-0.0463286	0.932978	unchanged	-0.526691	0.000138051	unchanged	0.00251346	0.996122	unchanged	0.273555	1	unchanged	0.242257	0.161383	unchanged	0.113163	0.557213	unchanged
ENSMUSG00000005686	chr7	110768205	110812405	+	Ampd3	adenosine monophosphate deaminase 3 [Source:MGI Symbol;Acc:MGI:1096344]	protein_coding	0.904376	-0.634238	0.758009	unchanged	0.526065	0.786571	unchanged	0.371687	NA	unchanged	-0.301999	0.916081	unchanged	-1.43382	0.460732	unchanged	-1.07962	1	unchanged	-1.69514	NA	unchanged	-0.792987	0.767085	unchanged
ENSMUSG00000005687	chr3	103171654	103179166	+	Bcas2	breast carcinoma amplified sequence 2 [Source:MGI Symbol;Acc:MGI:1915433]	protein_coding	261.066	-0.0278896	0.854235	unchanged	-0.621126	5.79681e-10	unchanged	0.180632	0.397243	unchanged	0.0232604	0.909305	unchanged	-0.0759624	0.641141	unchanged	-0.10564	1	unchanged	-0.211204	0.16693	unchanged	-0.0642997	0.739769	unchanged
ENSMUSG00000005698	chr8	105636567	105682922	+	Ctcf	CCCTC-binding factor [Source:MGI Symbol;Acc:MGI:109447]	protein_coding	66.4782	-0.0305759	0.878034	unchanged	-0.738718	5.46836e-08	unchanged	0.210047	0.462486	unchanged	-0.29395	0.0840081	unchanged	0.022333	0.937583	unchanged	-0.0555879	1	unchanged	-0.119055	0.673415	unchanged	-0.215613	0.326452	unchanged
ENSMUSG00000005699	chr8	105701147	105703496	+	Pard6a	par-6 family cell polarity regulator alpha [Source:MGI Symbol;Acc:MGI:1927223]	protein_coding	9.20311	-1.24086	0.000175276	Down	0.257877	0.495421	unchanged	-0.395728	0.566404	unchanged	0.0845544	0.90557	unchanged	-0.164581	0.751958	unchanged	0.297509	1	unchanged	-0.430756	0.422196	unchanged	0.0371142	0.95881	unchanged
ENSMUSG00000005705	chr8	105566697	105637393	-	Agrp	agouti related neuropeptide [Source:MGI Symbol;Acc:MGI:892013]	protein_coding	5.42302	-3.37203	3.52821e-07	Down	-2.76226	1.34967e-05	Down	0.936494	0.230544	unchanged	1.88848	0.0215113	Up	4.87747	6.8e-08	Up	-0.393823	1	unchanged	1.59188	0.0843905	unchanged	1.22938	0.371674	unchanged
ENSMUSG00000005718	chr16	4544660	4559854	-	Tfap4	transcription factor AP4 [Source:MGI Symbol;Acc:MGI:103239]	protein_coding	8.09679	-1.99299	1.24109e-07	Down	-0.903363	0.0336041	unchanged	-0.589864	0.380032	unchanged	1.03738	0.0267796	Up	-0.973788	0.197368	unchanged	0.129184	1	unchanged	-0.350137	0.689202	unchanged	0.0968547	0.950425	unchanged
ENSMUSG00000005732	chr16	18239783	18248732	-	Ranbp1	RAN binding protein 1 [Source:MGI Symbol;Acc:MGI:96269]	protein_coding	422.895	-0.107927	0.373577	unchanged	-0.164067	0.135784	unchanged	0.0380332	0.928708	unchanged	-0.0749698	0.645284	unchanged	0.119975	0.379088	unchanged	-0.00195245	1	unchanged	0.166466	0.274605	unchanged	-0.00883126	0.967498	unchanged
ENSMUSG00000005774	chr3	94954074	94961561	+	Rfx5	regulatory factor X, 5 (influences HLA class II expression) [Source:MGI Symbol;Acc:MGI:1858421]	protein_coding	1.98803	-0.390737	0.676694	unchanged	0.635662	0.481359	unchanged	-0.477296	0.851629	unchanged	-1.62202	0.192941	unchanged	-1.94909	0.10148	unchanged	0.334578	1	unchanged	-2.20055	0.0884244	unchanged	-1.72343	0.174688	unchanged
ENSMUSG00000005779	chr3	94884092	94886961	-	Psmb4	proteasome (prosome, macropain) subunit, beta type 4 [Source:MGI Symbol;Acc:MGI:1098257]	protein_coding	508.152	0.438768	0.000369437	unchanged	0.134532	0.335679	unchanged	0.186277	0.491266	unchanged	0.36486	0.0076484	unchanged	0.515345	6.38e-05	unchanged	-0.0200597	1	unchanged	0.118374	0.575714	unchanged	0.174083	0.316304	unchanged
ENSMUSG00000005802	chr2	122681232	122702663	-	Slc30a4	solute carrier family 30 (zinc transporter), member 4 [Source:MGI Symbol;Acc:MGI:1345282]	protein_coding	55.4135	0.0225627	0.949636	unchanged	-0.445502	0.0417958	unchanged	0.180218	0.770559	unchanged	-0.279958	0.328189	unchanged	0.957481	9.78e-05	unchanged	-0.00671245	1	unchanged	-0.0793417	0.855747	unchanged	0.380733	0.215416	unchanged
ENSMUSG00000005804	chr2	122738502	122749475	+	Bloc1s6	biogenesis of lysosomal organelles complex-1, subunit 6, pallidin [Source:MGI Symbol;Acc:MGI:1927580]	protein_coding	27.5904	0.139484	0.517787	unchanged	-0.304707	0.11777	unchanged	-0.0636989	0.931209	unchanged	-0.0108087	0.986661	unchanged	-0.509486	0.0372018	unchanged	0.216526	1	unchanged	-0.255586	0.420632	unchanged	-0.107471	0.769391	unchanged
ENSMUSG00000005813	chr3	138458955	138489515	-	Metap1	methionyl aminopeptidase 1 [Source:MGI Symbol;Acc:MGI:1922874]	protein_coding	78.121	-0.741719	4.35607e-10	unchanged	-0.561728	1.17861e-06	unchanged	0.0959414	0.776852	unchanged	0.0219284	0.93381	unchanged	0.0599074	0.786185	unchanged	-0.0303019	1	unchanged	-0.14721	0.489799	unchanged	-0.141761	0.482144	unchanged
ENSMUSG00000005823	chr17	57234634	57248446	-	Gpr108	G protein-coupled receptor 108 [Source:MGI Symbol;Acc:MGI:1925558]	protein_coding	25.852	1.51487	5.42986e-15	Up	1.63214	4.00256e-17	Up	-0.296971	0.627438	unchanged	-0.135575	0.593799	unchanged	-0.0788905	0.757615	unchanged	-0.295989	1	unchanged	-0.0568003	0.871195	unchanged	0.0669555	0.839063	unchanged
ENSMUSG00000005836	chr18	11052063	11085635	+	Gata6	GATA binding protein 6 [Source:MGI Symbol;Acc:MGI:107516]	protein_coding	297.861	-0.0461374	0.922248	unchanged	-0.288118	0.420461	unchanged	-0.0152546	1	unchanged	-0.0977887	0.865808	unchanged	1.25184	7.94e-05	Up	-0.149807	1	unchanged	0.477519	0.302333	unchanged	0.782075	0.0365442	unchanged
ENSMUSG00000005846	chr16	11192969	11203331	-	Rsl1d1	ribosomal L1 domain containing 1 [Source:MGI Symbol;Acc:MGI:1913659]	protein_coding	272.723	0.213135	0.0660932	unchanged	-0.995886	2.00505e-22	unchanged	0.106273	0.722697	unchanged	0.192412	0.151261	unchanged	0.0839766	0.619677	unchanged	-0.00659854	1	unchanged	-0.152635	0.390469	unchanged	-0.019232	0.939824	unchanged
ENSMUSG00000005871	chr18	34220923	34322552	+	Apc	APC, WNT signaling pathway regulator [Source:MGI Symbol;Acc:MGI:88039]	protein_coding	32.2693	0.311328	0.149146	unchanged	-0.0701025	0.770897	unchanged	-0.379123	0.345418	unchanged	0.0928766	0.77571	unchanged	-0.189371	0.498758	unchanged	-0.238605	1	unchanged	0.542364	0.0158714	unchanged	-0.250621	0.362273	unchanged
ENSMUSG00000005873	chr18	34344884	34374070	-	Reep5	receptor accessory protein 5 [Source:MGI Symbol;Acc:MGI:1270152]	protein_coding	34.0622	2.5679	2.86467e-08	Up	3.64688	4.27997e-22	Up	-2.00885	0.14653	unchanged	-1.12942	0.0103188	Down	0.36052	0.343531	unchanged	-0.0577755	1	unchanged	0.429453	0.359472	unchanged	-0.022867	0.971288	unchanged
ENSMUSG00000005881	chr2	156008044	156018279	+	Ergic3	ERGIC and golgi 3 [Source:MGI Symbol;Acc:MGI:1913616]	protein_coding	69.2434	0.0892528	0.604435	unchanged	0.711197	8.06256e-08	unchanged	-0.293418	0.238538	unchanged	-0.0362523	0.894403	unchanged	0.0215145	0.926685	unchanged	-0.122405	1	unchanged	0.160345	0.448983	unchanged	-0.0140912	0.959243	unchanged
ENSMUSG00000005882	chr2	155846893	155930310	-	Uqcc1	ubiquinol-cytochrome c reductase complex assembly factor 1 [Source:MGI Symbol;Acc:MGI:1929472]	protein_coding	38.5138	-0.818483	1.6029e-06	unchanged	-1.22729	1.45064e-14	Down	0.133996	0.778276	unchanged	-0.0466333	0.899496	unchanged	-0.0697979	0.850467	unchanged	-0.151589	1	unchanged	0.0797585	0.829992	unchanged	-0.0516035	0.897876	unchanged
ENSMUSG00000005886	chr1	13139104	13374083	-	Ncoa2	nuclear receptor coactivator 2 [Source:MGI Symbol;Acc:MGI:1276533]	protein_coding	17.8662	0.115009	0.813434	unchanged	1.26287	0.000198749	Up	-0.32167	0.759252	unchanged	-0.104111	0.877621	unchanged	-0.548765	0.167521	unchanged	0.428338	1	unchanged	0.284944	0.613762	unchanged	-0.151102	0.805684	unchanged
ENSMUSG00000005892	chr6	92242060	92244650	-	Trh	thyrotropin releasing hormone [Source:MGI Symbol;Acc:MGI:98823]	protein_coding	0.960876	0.447782	0.858697	unchanged	0	1	unchanged	-0.355444	NA	unchanged	-0.662672	0.838826	unchanged	-0.78418	0.770798	unchanged	0.404353	1	unchanged	0.460727	NA	unchanged	0.210733	0.956198	unchanged
ENSMUSG00000005893	chr6	92091389	92174294	+	Nr2c2	nuclear receptor subfamily 2, group C, member 2 [Source:MGI Symbol;Acc:MGI:1352466]	protein_coding	27.0612	-0.514756	0.0286483	unchanged	-0.537932	0.0133671	unchanged	0.176807	0.781868	unchanged	-0.605877	0.0378092	unchanged	-1.37012	1.17e-06	Down	-0.00999299	1	unchanged	0.0893125	0.84242	unchanged	-0.213829	0.572027	unchanged
ENSMUSG00000005897	chr10	94148022	94197211	+	Nr2c1	nuclear receptor subfamily 2, group C, member 1 [Source:MGI Symbol;Acc:MGI:1352465]	protein_coding	5.45044	-0.411949	0.492058	unchanged	-0.542163	0.309489	unchanged	0.173725	0.926906	unchanged	-0.386984	0.650523	unchanged	0.0232118	0.983294	unchanged	-0.026196	1	unchanged	0.386763	0.66513	unchanged	-0.274586	0.737929	unchanged
ENSMUSG00000005899	chr16	17619353	17644828	+	Smpd4	sphingomyelin phosphodiesterase 4 [Source:MGI Symbol;Acc:MGI:1924876]	protein_coding	49.8132	-0.377899	0.00647142	unchanged	-0.571037	2.69006e-05	unchanged	0.334904	0.0837031	unchanged	-0.000447879	1	unchanged	0.0688389	0.778864	unchanged	0.131269	1	unchanged	0.186909	0.432861	unchanged	-0.0290068	0.92955	unchanged
ENSMUSG00000005907	chr5	3596065	3637232	+	Pex1	peroxisomal biogenesis factor 1 [Source:MGI Symbol;Acc:MGI:1918632]	protein_coding	11.8507	-0.0688466	0.868148	unchanged	0.347551	0.28013	unchanged	-0.0780517	0.948553	unchanged	0.206693	0.646148	unchanged	-0.058516	0.901231	unchanged	0.327297	1	unchanged	-0.0209565	0.975325	unchanged	-0.601859	0.0964119	unchanged
ENSMUSG00000005936	chr17	28951949	28969549	+	Kctd20	potassium channel tetramerisation domain containing 20 [Source:MGI Symbol;Acc:MGI:1914239]	protein_coding	41.9726	0.0198137	0.934939	unchanged	0.109731	0.540606	unchanged	0.162293	0.670755	unchanged	-0.348287	0.0636711	unchanged	-0.0882987	0.725907	unchanged	0.0304377	1	unchanged	-0.271938	0.232729	unchanged	-0.383289	0.0475948	unchanged
ENSMUSG00000005947	chr11	73090582	73147446	+	Itgae	integrin alpha E, epithelial-associated [Source:MGI Symbol;Acc:MGI:1298377]	protein_coding	12.7618	-1.77554	4.2623e-07	Down	-1.54869	5.73872e-05	Down	0.390598	0.620033	unchanged	0.554562	0.26352	unchanged	0.579852	0.300491	unchanged	0.136377	1	unchanged	-0.465289	0.557906	unchanged	-0.289283	0.759257	unchanged
ENSMUSG00000005949	chr11	73183595	73199042	-	Ctns	cystinosis, nephropathic [Source:MGI Symbol;Acc:MGI:1932872]	protein_coding	9.02102	0.573118	0.143338	unchanged	2.67197	7.96313e-10	Up	0.144396	0.924718	unchanged	0.961303	0.004924	unchanged	0.42781	0.270013	unchanged	1.01717	1	unchanged	-0.139167	0.820662	unchanged	0.262135	0.603862	unchanged
ENSMUSG00000005951	chr11	73199459	73224511	+	Shpk	sedoheptulokinase [Source:MGI Symbol;Acc:MGI:1921887]	protein_coding	1.08987	2.49642	0.0184838	Up	1.88542	0.119264	unchanged	0.00522893	NA	unchanged	0.2508	0.862483	unchanged	1.26193	0.19213	unchanged	0.404353	1	unchanged	-0.180965	NA	unchanged	0.937127	0.519275	unchanged
ENSMUSG00000005958	chr16	21204754	21223305	+	Ephb3	Eph receptor B3 [Source:MGI Symbol;Acc:MGI:104770]	protein_coding	27.6199	1.33818	1.54822e-06	Up	2.00179	3.85359e-13	Up	-0.254921	0.794821	unchanged	-0.412972	0.227153	unchanged	-0.110886	0.781352	unchanged	0.203872	1	unchanged	-0.381279	0.333889	unchanged	0.303138	0.423484	unchanged
ENSMUSG00000005968	chr3	94612756	94658872	-	Tuft1	tuftelin 1 [Source:MGI Symbol;Acc:MGI:109572]	protein_coding	106.497	0.129129	0.611298	unchanged	0.718552	0.000202389	unchanged	-0.0117522	0.999621	unchanged	0.424291	0.0708357	unchanged	0.753071	0.000131555	unchanged	0.100951	1	unchanged	0.639753	0.00554793	unchanged	0.67028	0.00154701	unchanged
ENSMUSG00000005973	chr2	105386290	105399319	-	Rcn1	reticulocalbin 1 [Source:MGI Symbol;Acc:MGI:104559]	protein_coding	7.73174	-0.273565	0.88337	unchanged	5.07515	3.22785e-07	Up	0.365902	0.945081	unchanged	0.0586749	0.98742	unchanged	-2.96673	0.0100278	Down	0.765027	1	unchanged	0.370638	0.78102	unchanged	-0.989867	0.264795	unchanged
ENSMUSG00000005981	chr16	4039970	4077827	-	Trap1	TNF receptor-associated protein 1 [Source:MGI Symbol;Acc:MGI:1915265]	protein_coding	52.8637	1.0056	3.6757e-11	Up	1.45546	2.71783e-22	Up	-0.0708969	0.920974	unchanged	0.280916	0.0978624	unchanged	0.146447	0.478952	unchanged	0.00106296	1	unchanged	-0.01205	0.972407	unchanged	0.166711	0.424699	unchanged
ENSMUSG00000005982	chr16	3872374	3904770	+	Naa60	N(alpha)-acetyltransferase 60, NatF catalytic subunit [Source:MGI Symbol;Acc:MGI:1922013]	protein_coding	26.9968	-1.17351	6.90645e-09	Down	-0.17504	0.469293	unchanged	-0.0206026	0.982051	unchanged	-0.16095	0.672042	unchanged	-0.251019	0.381139	unchanged	0.0908128	1	unchanged	0.0570761	0.900628	unchanged	-0.174477	0.635938	unchanged
ENSMUSG00000005983	chr16	3895178	3908689	-	1700037C18Rik	RIKEN cDNA 1700037C18 gene [Source:MGI Symbol;Acc:MGI:1920511]	protein_coding	2.13549	0.310565	0.709668	unchanged	0.321066	0.747472	unchanged	-0.077611	0.980142	unchanged	1.24605	0.059579	unchanged	1.7723	0.0792757	unchanged	-0.272231	1	unchanged	0.849146	0.446694	unchanged	0.671371	0.563602	unchanged
ENSMUSG00000005986	chr19	4270179	4283137	-	Ankrd13d	ankyrin repeat domain 13 family, member D [Source:MGI Symbol;Acc:MGI:1915673]	protein_coding	0.876318	-1.64268	0.164646	unchanged	-1.08419	0.361669	unchanged	1.07751	NA	unchanged	0.419348	0.855267	unchanged	-0.423507	0.829125	unchanged	-0.454258	1	unchanged	-0.260922	NA	unchanged	0.784727	0.679458	unchanged
ENSMUSG00000006005	chr1	150392837	150449935	+	Tpr	translocated promoter region, nuclear basket protein [Source:MGI Symbol;Acc:MGI:1922066]	protein_coding	153.931	1.26087	2.05192e-30	Up	-0.337146	0.00392701	unchanged	-0.167983	0.566404	unchanged	-0.427282	0.000416317	unchanged	0.0353897	0.870317	unchanged	-0.0635366	1	unchanged	0.0488833	0.839264	unchanged	0.030703	0.90466	unchanged
ENSMUSG00000006010	chr1	150361304	150393080	-	Odr4	odr4 GPCR localization factor homolog [Source:MGI Symbol;Acc:MGI:2385108]	protein_coding	32.795	0.770112	9.29127e-07	unchanged	-1.32154	1.87049e-16	Down	-0.106177	0.869673	unchanged	0.355999	0.0369243	unchanged	0.327864	0.230928	unchanged	-0.0134635	1	unchanged	0.120099	0.745904	unchanged	0.270049	0.334526	unchanged
ENSMUSG00000006014	chr1	150449411	150466165	-	Prg4	proteoglycan 4 (megakaryocyte stimulating factor, articular superficial zone protein) [Source:MGI Symbol;Acc:MGI:1891344]	protein_coding	0.723074	0.504832	0.647601	unchanged	0.0641513	0.964442	unchanged	-0.0185581	NA	unchanged	-1.88159	0.145608	unchanged	-0.0628333	0.983152	unchanged	-0.120454	1	unchanged	-0.574085	NA	unchanged	0.210733	NA	unchanged
ENSMUSG00000006019	chr7	16197146	16222037	-	Dhx34	DEAH (Asp-Glu-Ala-His) box polypeptide 34 [Source:MGI Symbol;Acc:MGI:1918973]	protein_coding	8.50528	-0.635725	0.098959	unchanged	0.367982	0.327289	unchanged	-0.0298179	0.988016	unchanged	0.115935	0.873691	unchanged	0.0395642	0.946223	unchanged	-0.262834	1	unchanged	-0.125895	0.852412	unchanged	-0.0614273	0.936892	unchanged
ENSMUSG00000006021	chr7	16119894	16127516	+	Kptn	kaptin [Source:MGI Symbol;Acc:MGI:1890380]	protein_coding	13.7996	-1.54273	1.80656e-08	Down	-0.228994	0.466604	unchanged	0.402944	0.37118	unchanged	0.298623	0.51939	unchanged	-0.201183	0.667295	unchanged	-0.0305387	1	unchanged	-0.435033	0.334912	unchanged	0.0915274	0.881818	unchanged
ENSMUSG00000006024	chr7	16098457	16117975	+	Napa	N-ethylmaleimide sensitive fusion protein attachment protein alpha [Source:MGI Symbol;Acc:MGI:104563]	protein_coding	99.0846	-0.705383	5.17018e-09	unchanged	0.484057	3.09231e-05	unchanged	-0.1028	0.76463	unchanged	0.0861266	0.687023	unchanged	0.136338	0.370138	unchanged	0.068963	1	unchanged	-0.0735774	0.745505	unchanged	0.0402955	0.861288	unchanged
ENSMUSG00000006050	chr18	36666680	36670815	-	Sra1	steroid receptor RNA activator 1 [Source:MGI Symbol;Acc:MGI:1344414]	protein_coding	93.9831	0.256868	0.188922	unchanged	0.707344	5.84195e-05	unchanged	0.132211	0.816943	unchanged	-0.0835481	0.781984	unchanged	0.0146266	0.971856	unchanged	0.0260456	1	unchanged	0.0928905	0.78874	unchanged	0.258147	0.298068	unchanged
ENSMUSG00000006056	chr11	96099325	96111964	-	Calcoco2	calcium binding and coiled-coil domain 2 [Source:MGI Symbol;Acc:MGI:1343177]	protein_coding	3304.54	-0.349467	0.00187557	unchanged	-0.260115	0.0231628	unchanged	-0.157424	0.53449	unchanged	0.172288	0.228558	unchanged	0.441521	0.000110258	unchanged	0.102388	1	unchanged	0.216722	0.167406	unchanged	0.526616	8.26141e-06	unchanged
ENSMUSG00000006057	chr11	96068851	96075670	-	Atp5g1	ATP synthase, H+ transporting, mitochondrial F0 complex, subunit C1 (subunit 9) [Source:MGI Symbol;Acc:MGI:107653]	protein_coding	1149.27	-0.862891	1.91048e-19	unchanged	0.504242	2.05527e-07	unchanged	0.306605	0.0351452	unchanged	0.461046	1.34201e-05	unchanged	0.758001	1.81e-14	unchanged	-0.0183808	1	unchanged	0.358374	0.00252442	unchanged	0.317368	0.00674563	unchanged
ENSMUSG00000006058	chr11	96034884	96047430	+	Snf8	SNF8, ESCRT-II complex subunit, homolog (S. cerevisiae) [Source:MGI Symbol;Acc:MGI:1343161]	protein_coding	93.446	-0.851041	1.23168e-06	unchanged	-0.636908	0.000387159	unchanged	0.107519	0.869388	unchanged	0.583032	0.00351615	unchanged	1.11135	2.9e-08	Up	0.0199647	1	unchanged	-0.0389105	0.926489	unchanged	0.0472469	0.909678	unchanged
ENSMUSG00000006095	chr7	30224130	30232272	-	Tbcb	tubulin folding cofactor B [Source:MGI Symbol;Acc:MGI:1913661]	protein_coding	91.6213	0.635105	1.21064e-07	unchanged	0.632399	1.83719e-08	unchanged	-0.110075	0.780453	unchanged	-0.0968948	0.590206	unchanged	-0.00490826	0.983763	unchanged	0.0811396	1	unchanged	-0.0142887	0.958508	unchanged	-0.183811	0.215184	unchanged
ENSMUSG00000006127	chr11	75630987	75648871	+	Inpp5k	inositol polyphosphate 5-phosphatase K [Source:MGI Symbol;Acc:MGI:1194899]	protein_coding	17.9289	-0.319289	0.236988	unchanged	0.052005	0.883504	unchanged	0.108783	0.901151	unchanged	0.0555599	0.906401	unchanged	0.373623	0.203303	unchanged	-0.276504	1	unchanged	-0.033745	0.955186	unchanged	0.00225698	0.9977	unchanged
ENSMUSG00000006134	chr16	17451986	17487434	+	Crkl	v-crk avian sarcoma virus CT10 oncogene homolog-like [Source:MGI Symbol;Acc:MGI:104686]	protein_coding	37.8232	1.03789	6.65158e-09	Up	1.08508	1.69336e-10	Up	-0.492142	0.166346	unchanged	-0.417209	0.0414214	unchanged	-0.440908	0.0429444	unchanged	-0.0464648	1	unchanged	0.42293	0.0393086	unchanged	-0.513111	0.0111021	unchanged
ENSMUSG00000006143	chr5	136054491	136064326	+	Upk3bl	uroplakin 3B-like [Source:MGI Symbol;Acc:MGI:1916915]	protein_coding	0.397427	0.0871083	0.982358	unchanged	-0.867166	0.788011	unchanged	0.00522892	NA	unchanged	-0.301998	NA	unchanged	0	NA	unchanged	0.0436796	1	unchanged	0.821399	NA	unchanged	0	NA	unchanged
ENSMUSG00000006154	chr7	4460673	4480487	+	Eps8l1	EPS8-like 1 [Source:MGI Symbol;Acc:MGI:1914675]	protein_coding	1.22023	-0.04514	0.971619	unchanged	0.619108	0.556121	unchanged	0.656044	NA	unchanged	-0.811739	0.572818	unchanged	0.199145	0.885985	unchanged	0.426462	1	unchanged	-1.85074	NA	unchanged	-0.484301	0.758931	unchanged
ENSMUSG00000006169	chr11	45851963	45910625	+	Clint1	clathrin interactor 1 [Source:MGI Symbol;Acc:MGI:2144243]	protein_coding	71.1552	0.147308	0.412459	unchanged	0.763579	2.39071e-07	unchanged	-0.0501673	0.937065	unchanged	0.0953491	0.696734	unchanged	0.116812	0.598653	unchanged	-0.0327715	1	unchanged	0.402809	0.0283168	unchanged	0.44059	0.0124261	unchanged
ENSMUSG00000006179	chr13	22002172	22009742	-	Prss16	protease, serine 16 (thymus) [Source:MGI Symbol;Acc:MGI:1859181]	protein_coding	1.58175	0.682848	0.487503	unchanged	0.211035	0.819957	unchanged	0.334772	0.922066	unchanged	-0.0703388	0.973138	unchanged	-1.85984	0.0856215	unchanged	0.113062	1	unchanged	-0.817042	0.538972	unchanged	-1.21591	0.206616	unchanged
ENSMUSG00000006191	chr13	29191745	29855674	-	Cdkal1	CDK5 regulatory subunit associated protein 1-like 1 [Source:MGI Symbol;Acc:MGI:1921765]	protein_coding	10.4744	0.834611	0.0100963	unchanged	0.859428	0.00707743	unchanged	-0.0722644	0.961374	unchanged	-0.074838	0.897175	unchanged	-0.591854	0.114754	unchanged	-0.350725	1	unchanged	-0.241163	0.661822	unchanged	-0.376151	0.446404	unchanged
ENSMUSG00000006200	chrX	37826909	37829857	+	Rhox6	reproductive homeobox 6 [Source:MGI Symbol;Acc:MGI:1202888]	protein_coding	8.16503	-1.39233	0.564769	unchanged	-0.14582	0.962208	unchanged	-0.392191	0.962471	unchanged	0.419348	0.909584	unchanged	3.30034	0.109153	unchanged	0.0436796	1	unchanged	-0.26062	0.955767	unchanged	0.210733	0.959243	unchanged
ENSMUSG00000006205	chr7	130936110	130985660	+	Htra1	HtrA serine peptidase 1 [Source:MGI Symbol;Acc:MGI:1929076]	protein_coding	29.1918	-0.129229	0.878714	unchanged	-0.825128	0.220705	unchanged	-0.592253	0.714269	unchanged	2.57265	8.44881e-06	Up	0.161829	0.845614	unchanged	-0.0875471	1	unchanged	0.300867	0.81154	unchanged	-1.48491	0.0260342	Down
ENSMUSG00000006215	chr4	141444653	141467930	+	Zbtb17	zinc finger and BTB domain containing 17 [Source:MGI Symbol;Acc:MGI:107410]	protein_coding	71.5454	-0.597184	0.000754929	unchanged	0.0235876	0.929727	unchanged	-0.168353	0.721033	unchanged	0.167573	0.532468	unchanged	0.361178	0.0667645	unchanged	-0.0595832	1	unchanged	0.178518	0.540902	unchanged	0.567697	0.00355586	unchanged
ENSMUSG00000006216	chr4	141404352	141416014	-	Clcnkb	chloride channel, voltage-sensitive Kb [Source:MGI Symbol;Acc:MGI:1930643]	protein_coding	11.5667	-0.59486	0.191264	unchanged	1.96311	5.78765e-07	Up	-0.294197	0.819368	unchanged	-1.00268	0.0807339	unchanged	-0.276469	0.613821	unchanged	0.0295258	1	unchanged	0.145764	0.841329	unchanged	0.187555	0.784791	unchanged
ENSMUSG00000006218	chr4	141368219	141384175	+	Fam131c	family with sequence similarity 131, member C [Source:MGI Symbol;Acc:MGI:2685539]	protein_coding	1.02239	-3.1558	0.00215854	Down	-3.30165	0.000990004	Down	0.296494	NA	unchanged	-0.301999	0.899569	unchanged	-0.78418	0.660261	unchanged	-0.779704	1	unchanged	0.460727	NA	unchanged	-0.718276	0.71919	unchanged
ENSMUSG00000006219	chr4	141576061	141606096	-	Fblim1	filamin binding LIM protein 1 [Source:MGI Symbol;Acc:MGI:1921452]	protein_coding	98.5859	-0.716905	0.000294778	unchanged	-0.108909	0.667171	unchanged	0.731372	0.00326669	unchanged	0.817129	0.000107105	unchanged	-0.0163919	0.971856	unchanged	0.185391	1	unchanged	0.0635257	0.88257	unchanged	-0.328469	0.248217	unchanged
ENSMUSG00000006235	chr9	21958896	21963506	-	Epor	erythropoietin receptor [Source:MGI Symbol;Acc:MGI:95408]	protein_coding	0.193836	0	NA	unchanged	-0.145819	NA	unchanged	0	NA	unchanged	0	NA	unchanged	0	NA	unchanged	0.0436793	1	unchanged	0	NA	unchanged	0	NA	unchanged
ENSMUSG00000006241	chr9	21927470	21935872	+	Ccdc159	coiled-coil domain containing 159 [Source:MGI Symbol;Acc:MGI:1914369]	protein_coding	0.138048	0	NA	unchanged	0.575523	NA	unchanged	0	NA	unchanged	0	NA	unchanged	0	NA	unchanged	0	1	unchanged	0.460724	NA	unchanged	0.571403	NA	unchanged
ENSMUSG00000006262	chr5	88720854	88764220	+	Mob1b	MOB kinase activator 1B [Source:MGI Symbol;Acc:MGI:1915723]	protein_coding	36.7705	-1.6403	3.03258e-16	Down	-1.46914	5.28389e-13	Down	-0.59353	0.0388447	unchanged	0.216422	0.514255	unchanged	0.340965	0.251604	unchanged	-0.218812	1	unchanged	0.0900442	0.848128	unchanged	-0.139935	0.748533	unchanged
ENSMUSG00000006273	chr8	69088645	69113711	+	Atp6v1b2	ATPase, H+ transporting, lysosomal V1 subunit B2 [Source:MGI Symbol;Acc:MGI:109618]	protein_coding	99.9285	0.842647	1.05537e-09	unchanged	0.578159	1.63011e-05	unchanged	0.0547279	0.929107	unchanged	0.180661	0.319986	unchanged	0.241744	0.144063	unchanged	-0.0410353	1	unchanged	-0.210846	0.309069	unchanged	0.266809	0.137578	unchanged
ENSMUSG00000006276	chr8	72340998	72421460	-	Eps15l1	epidermal growth factor receptor pathway substrate 15-like 1 [Source:MGI Symbol;Acc:MGI:104582]	protein_coding	33.0821	0.0569236	0.813134	unchanged	0.706091	2.22119e-06	unchanged	-0.214499	0.620078	unchanged	-0.369507	0.0939345	unchanged	-0.417808	0.0431016	unchanged	-0.0593913	1	unchanged	-0.237228	0.29536	unchanged	-0.10097	0.694446	unchanged
ENSMUSG00000006281	chr14	50824058	50870560	-	Tep1	telomerase associated protein 1 [Source:MGI Symbol;Acc:MGI:109573]	protein_coding	14.4529	0.27637	0.366999	unchanged	0.082314	0.825403	unchanged	-0.171049	0.863421	unchanged	-0.466411	0.167088	unchanged	-0.167432	0.718474	unchanged	-0.192244	1	unchanged	-0.357806	0.440057	unchanged	0.0336115	0.957489	unchanged
ENSMUSG00000006288	chr14	50765414	50785519	-	Ttc5	tetratricopeptide repeat domain 5 [Source:MGI Symbol;Acc:MGI:2683584]	protein_coding	8.37701	1.23406	0.00320929	Up	1.47094	0.000366887	Up	0.478508	0.668473	unchanged	-0.257502	0.667826	unchanged	-0.0237149	0.980149	unchanged	-0.81116	1	unchanged	-0.490621	0.425288	unchanged	-0.194176	0.798173	unchanged
ENSMUSG00000006289	chr14	50906477	50924893	-	Osgep	O-sialoglycoprotein endopeptidase [Source:MGI Symbol;Acc:MGI:1913496]	protein_coding	61.5364	0.276088	0.0811475	unchanged	0.355648	0.0113833	unchanged	0.108279	0.822934	unchanged	-0.00831108	0.98742	unchanged	-0.300993	0.102751	unchanged	0.255446	1	unchanged	-0.14842	0.525936	unchanged	-0.405639	0.0154179	unchanged
ENSMUSG00000006299	chr1	74279839	74284738	-	Aamp	angio-associated migratory protein [Source:MGI Symbol;Acc:MGI:107809]	protein_coding	99.3997	-0.998227	4.99362e-23	unchanged	-0.786947	2.18164e-15	unchanged	-0.277777	0.0628708	unchanged	-0.10503	0.551665	unchanged	0.164248	0.282548	unchanged	-0.134517	1	unchanged	0.00887854	0.974055	unchanged	0.0461259	0.835746	unchanged
ENSMUSG00000006301	chr1	74288246	74305622	-	Tmbim1	transmembrane BAX inhibitor motif containing 1 [Source:MGI Symbol;Acc:MGI:1916910]	protein_coding	43.2613	0.622291	0.0017355	unchanged	0.498169	0.00876213	unchanged	0.228732	0.651844	unchanged	-0.617202	0.00520461	unchanged	-0.148805	0.609838	unchanged	0.0887147	1	unchanged	0.38016	0.126577	unchanged	0.610604	0.00222108	unchanged
ENSMUSG00000006304	chr1	74236083	74268209	+	Arpc2	actin related protein 2/3 complex, subunit 2 [Source:MGI Symbol;Acc:MGI:1923959]	protein_coding	349.579	0.411762	0.011247	unchanged	-0.393013	0.0142826	unchanged	0.0113088	0.995068	unchanged	0.0412124	0.895087	unchanged	0.856764	2.99e-08	unchanged	0.0830084	1	unchanged	0.472216	0.015841	unchanged	-0.0519325	0.867672	unchanged
ENSMUSG00000006307	chr7	30568857	30588726	-	Kmt2b	lysine (K)-specific methyltransferase 2B [Source:MGI Symbol;Acc:MGI:109565]	protein_coding	40.5959	0.828606	8.97791e-07	unchanged	1.2094	7.5305e-14	Up	-0.203447	0.68224	unchanged	-0.819144	7.79762e-06	unchanged	-0.47717	0.0140734	unchanged	0.108657	1	unchanged	0.085636	0.777432	unchanged	-0.304496	0.147489	unchanged
ENSMUSG00000006310	chr7	30589680	30598909	-	Zbtb32	zinc finger and BTB domain containing 32 [Source:MGI Symbol;Acc:MGI:1891838]	protein_coding	2.08356	-1.81114	0.115888	unchanged	0.886473	0.513127	unchanged	-0.0206217	1	unchanged	1.45118	0.34035	unchanged	-0.141696	0.895263	unchanged	0.719224	1	unchanged	-0.209437	0.93667	unchanged	-0.14994	0.955942	unchanged
ENSMUSG00000006311	chr7	30633615	30635852	-	Etv2	ets variant 2 [Source:MGI Symbol;Acc:MGI:99253]	protein_coding	1.12222	0.086254	0.961337	unchanged	0.0194367	0.994869	unchanged	0.418913	NA	unchanged	-1.96192	0.170092	unchanged	-2.05931	0.119711	unchanged	-0.142717	1	unchanged	-1.21295	NA	unchanged	-1.79538	0.250965	unchanged
ENSMUSG00000006313	chr7	30603091	30612847	-	Upk1a	uroplakin 1A [Source:MGI Symbol;Acc:MGI:98911]	protein_coding	2.77714	-1.71765	0.101406	unchanged	2.07957	0.0236042	Up	-0.2147	0.943749	unchanged	1.06371	0.474773	unchanged	-0.439989	0.634642	unchanged	1.06698	1	unchanged	0.31778	0.799854	unchanged	-0.669345	0.512611	unchanged
ENSMUSG00000006315	chr7	30727700	30729540	-	Tmem147	transmembrane protein 147 [Source:MGI Symbol;Acc:MGI:1915011]	protein_coding	80.767	0.749186	1.05167e-05	unchanged	1.40299	1.09559e-19	Up	-0.0173529	0.986473	unchanged	0.114408	0.661932	unchanged	0.197053	0.341449	unchanged	0.0625412	1	unchanged	0.166664	0.519685	unchanged	-0.0420626	0.90082	unchanged
ENSMUSG00000006333	chr7	3703992	3706897	+	Rps9	ribosomal protein S9 [Source:MGI Symbol;Acc:MGI:1924096]	protein_coding	2200.93	0.0715018	0.639804	unchanged	0.149045	0.262627	unchanged	-0.0497059	0.918976	unchanged	0.133934	0.420651	unchanged	0.0597645	0.737049	unchanged	-0.0183348	1	unchanged	0.0904725	0.681593	unchanged	0.284766	0.0514304	unchanged
ENSMUSG00000006335	chr7	3620323	3629929	-	Tfpt	TCF3 (E2A) fusion partner [Source:MGI Symbol;Acc:MGI:1916964]	protein_coding	12.8466	-0.246528	0.390167	unchanged	-0.670303	0.00924929	unchanged	0.261388	0.651171	unchanged	0.0956179	0.836177	unchanged	-0.634009	0.0556714	unchanged	-0.288105	1	unchanged	-0.279624	0.581514	unchanged	0.345235	0.380892	unchanged
ENSMUSG00000006342	chr10	75636705	75644008	-	Susd2	sushi domain containing 2 [Source:MGI Symbol;Acc:MGI:1918983]	protein_coding	3.35348	-0.650607	0.475584	unchanged	-0.0484833	0.966208	unchanged	-1.12756	0.536033	unchanged	-0.916892	0.495046	unchanged	-1.0449	0.136988	unchanged	-0.360476	1	unchanged	-0.649449	0.66695	unchanged	-2.14713	0.0208202	Down
ENSMUSG00000006344	chr10	75589339	75617200	+	Ggt5	gamma-glutamyltransferase 5 [Source:MGI Symbol;Acc:MGI:1346063]	protein_coding	0.208837	0	NA	unchanged	0	NA	unchanged	0.365901	NA	unchanged	0	NA	unchanged	0.658511	NA	unchanged	0.404351	1	unchanged	0.460725	NA	unchanged	0.571404	NA	unchanged
ENSMUSG00000006345	chr10	75561603	75586200	+	Ggt1	gamma-glutamyltransferase 1 [Source:MGI Symbol;Acc:MGI:95706]	protein_coding	16.0062	1.6625	6.24126e-07	Up	1.72724	5.48555e-08	Up	0.17039	0.90999	unchanged	0.183828	0.701731	unchanged	0.894772	0.0205042	unchanged	0.047848	1	unchanged	0.762783	0.0341446	unchanged	1.46378	2.11071e-06	Up
ENSMUSG00000006356	chr12	113140235	113145506	+	Crip2	cysteine rich protein 2 [Source:MGI Symbol;Acc:MGI:1915587]	protein_coding	187.35	-1.53969	2.04155e-12	Down	-0.604265	0.00969328	unchanged	0.141665	0.864515	unchanged	0.617273	0.018969	unchanged	2.25227	2.84e-23	Up	0.211807	1	unchanged	0.235432	0.551056	unchanged	0.839276	0.00148247	unchanged
ENSMUSG00000006360	chr12	113146315	113153879	+	Crip1	cysteine-rich protein 1 (intestinal) [Source:MGI Symbol;Acc:MGI:88501]	protein_coding	59.355	-2.88113	1.72596e-19	Down	-0.41194	0.27072	unchanged	-0.0261451	0.99033	unchanged	1.20324	0.0014744	Up	3.10676	3.63e-22	Up	0.389265	1	unchanged	1.3792	0.000228913	Up	-0.106858	0.871481	unchanged
ENSMUSG00000006362	chr8	122625140	122699109	-	Cbfa2t3	CBFA2/RUNX1 translocation partner 3 [Source:MGI Symbol;Acc:MGI:1338013]	protein_coding	8.46847	-2.39259	1.94128e-08	Down	-1.94183	5.43896e-05	Down	0.546251	0.462486	unchanged	1.8194	0.000146894	Up	2.12945	0.000104688	Up	-0.0967496	1	unchanged	1.08676	0.131408	unchanged	0.294178	0.751181	unchanged
ENSMUSG00000006369	chr15	85205948	85286535	+	Fbln1	fibulin 1 [Source:MGI Symbol;Acc:MGI:95487]	protein_coding	26.9493	1.14044	0.00262177	Up	2.41556	1.05653e-11	Up	-0.204444	0.891494	unchanged	-0.539408	0.252482	unchanged	0.958008	0.00916976	unchanged	0.0848826	1	unchanged	0.634168	0.172966	unchanged	1.09654	0.00451853	Up
ENSMUSG00000006373	chrX	36598205	36606079	+	Pgrmc1	progesterone receptor membrane component 1 [Source:MGI Symbol;Acc:MGI:1858305]	protein_coding	68.9494	0.54459	0.0668253	unchanged	-0.26413	0.425078	unchanged	0.0876291	0.943145	unchanged	0.351194	0.343989	unchanged	0.872794	0.00467165	unchanged	0.504953	1	unchanged	0.482716	0.248451	unchanged	0.206383	0.680068	unchanged
ENSMUSG00000006378	chr15	79030873	79038353	+	Gcat	glycine C-acetyltransferase (2-amino-3-ketobutyrate-coenzyme A ligase) [Source:MGI Symbol;Acc:MGI:1349389]	protein_coding	36.5045	0.141398	0.713257	unchanged	1.20117	1.00343e-05	Up	-0.523084	0.386357	unchanged	-0.53668	0.153991	unchanged	-2.04949	1.22e-11	Down	0.502299	1	unchanged	-0.45685	0.256278	unchanged	-0.65454	0.0523602	unchanged
ENSMUSG00000006386	chr4	94739288	94874976	+	Tek	TEK receptor tyrosine kinase [Source:MGI Symbol;Acc:MGI:98664]	protein_coding	0.599702	1.81951	0.227861	unchanged	1.31194	0.440254	unchanged	-0.716118	NA	unchanged	0.713548	NA	unchanged	1.46635	0.401625	unchanged	-0.316994	1	unchanged	0.364335	NA	unchanged	0.93208	NA	unchanged
ENSMUSG00000006389	chr4	118442414	118457513	-	Mpl	myeloproliferative leukemia virus oncogene [Source:MGI Symbol;Acc:MGI:97076]	protein_coding	1.61782	-5.14441	1.24109e-07	Down	-4.6347	2.3074e-06	Down	0.589022	0.745096	unchanged	0	1	unchanged	0.29784	0.884789	unchanged	-0.0768339	1	unchanged	0	1	unchanged	0	1	unchanged
ENSMUSG00000006390	chr4	118428092	118432953	+	Elovl1	elongation of very long chain fatty acids (FEN1/Elo2, SUR4/Elo3, yeast)-like 1 [Source:MGI Symbol;Acc:MGI:1858959]	protein_coding	9.64256	-0.707642	0.156811	unchanged	0.979533	0.0213541	unchanged	-0.221742	0.88891	unchanged	0.36094	0.621164	unchanged	0.849487	0.0450689	unchanged	0.759739	1	unchanged	0.330189	0.627289	unchanged	-0.163313	0.814214	unchanged
ENSMUSG00000006392	chr4	118409336	118415782	+	Med8	mediator complex subunit 8 [Source:MGI Symbol;Acc:MGI:1915269]	protein_coding	62.0218	-0.103057	0.576522	unchanged	-0.359245	0.011333	unchanged	0.132374	0.748795	unchanged	-0.0562212	0.840952	unchanged	-0.0573161	0.823165	unchanged	0.142497	1	unchanged	-0.261244	0.230818	unchanged	-0.156055	0.485088	unchanged
ENSMUSG00000006395	chr4	118359989	118362744	+	Hyi	hydroxypyruvate isomerase (putative) [Source:MGI Symbol;Acc:MGI:1915430]	polymorphic_pseudogene	2.20668	0.808456	0.590259	unchanged	3.00765	0.00111313	Up	0.726576	0.869673	unchanged	0.995732	0.543604	unchanged	-0.187155	0.887731	unchanged	1.22088	1	unchanged	0.360889	0.741397	unchanged	0.949029	0.178208	unchanged
ENSMUSG00000006398	chr4	118432900	118437352	-	Cdc20	cell division cycle 20 [Source:MGI Symbol;Acc:MGI:1859866]	protein_coding	231.606	-2.10473	8.41387e-25	Down	-1.25265	1.51288e-09	Down	-0.0394533	0.965271	unchanged	0.508056	0.0496103	unchanged	0.749869	0.00122955	unchanged	-0.123321	1	unchanged	0.0400097	0.937862	unchanged	0.449009	0.111853	unchanged
ENSMUSG00000006412	chr1	171345669	171359254	+	Pfdn2	prefoldin 2 [Source:MGI Symbol;Acc:MGI:1276111]	protein_coding	50.3427	0.134137	0.503189	unchanged	-0.640037	7.69212e-05	unchanged	0.157402	0.729961	unchanged	0.241425	0.252674	unchanged	0.0743834	0.807584	unchanged	-0.0225228	1	unchanged	0.0190733	0.964609	unchanged	0.210567	0.428003	unchanged
ENSMUSG00000006418	chr2	167492644	167516173	+	Rnf114	ring finger protein 114 [Source:MGI Symbol;Acc:MGI:1933159]	protein_coding	111.273	-0.706979	1.93827e-08	unchanged	-0.365359	0.00369096	unchanged	0.0952991	0.808142	unchanged	-0.357433	0.0270613	unchanged	-0.484962	0.00112088	unchanged	-0.049278	1	unchanged	0.0349558	0.899298	unchanged	-0.282516	0.0809875	unchanged
ENSMUSG00000006423	chrX	36823736	36874111	-	C330007P06Rik	RIKEN cDNA C330007P06 gene [Source:MGI Symbol;Acc:MGI:1924894]	protein_coding	27.5563	-0.0914277	0.756749	unchanged	-0.101642	0.725095	unchanged	-0.0918152	0.917588	unchanged	-0.659073	0.012252	unchanged	-0.599254	0.0221686	unchanged	0.131564	1	unchanged	-0.167176	0.700006	unchanged	-0.2453	0.545376	unchanged
ENSMUSG00000006435	chr19	47178819	47259441	+	Neurl1a	neuralized E3 ubiquitin protein ligase 1A [Source:MGI Symbol;Acc:MGI:1334263]	protein_coding	4.74623	-1.20881	0.0604642	unchanged	1.80144	0.00207797	Up	0.292729	0.874277	unchanged	0.72009	0.416956	unchanged	-0.446125	0.651535	unchanged	0.678625	1	unchanged	-1.79518	0.0197561	Down	-1.16475	0.148349	unchanged
ENSMUSG00000006442	chr4	148591502	148594993	+	Srm	spermidine synthase [Source:MGI Symbol;Acc:MGI:102690]	protein_coding	217.104	-1.26786	1.13245e-10	Down	-0.289507	0.19288	unchanged	-0.103563	0.890031	unchanged	-0.268715	0.341641	unchanged	0.342875	0.157056	unchanged	0.115775	1	unchanged	-0.296437	0.345039	unchanged	-0.0344582	0.939764	unchanged
ENSMUSG00000006445	chr4	141301239	141329384	+	Epha2	Eph receptor A2 [Source:MGI Symbol;Acc:MGI:95278]	protein_coding	15.9068	0.300927	0.664742	unchanged	0.780312	0.17046	unchanged	-1.00568	0.387241	unchanged	-2.15122	0.00263535	Down	-3.32459	9.9e-06	Down	-0.05901	1	unchanged	1.01713	0.137415	unchanged	-1.04365	0.105616	unchanged
ENSMUSG00000006456	chr19	4800568	4811634	-	Rbm14	RNA binding motif protein 14 [Source:MGI Symbol;Acc:MGI:1929092]	protein_coding	61.0313	0.321688	0.182477	unchanged	0.0164156	0.962208	unchanged	-0.121661	0.881328	unchanged	-0.245687	0.420652	unchanged	-0.130091	0.704755	unchanged	-0.164034	1	unchanged	-0.0533966	0.912269	unchanged	0.261459	0.414957	unchanged
ENSMUSG00000006463	chr19	4878667	4885397	+	Zdhhc24	zinc finger, DHHC domain containing 24 [Source:MGI Symbol;Acc:MGI:1917855]	protein_coding	6.68676	-0.893007	0.029213	unchanged	-0.386167	0.36363	unchanged	0.112603	0.935245	unchanged	0.103023	0.901689	unchanged	0.925415	0.0280128	unchanged	0.423489	1	unchanged	0.164905	0.833083	unchanged	0.204374	0.749733	unchanged
ENSMUSG00000006464	chr19	4886877	4906628	-	Bbs1	Bardet-Biedl syndrome 1 (human) [Source:MGI Symbol;Acc:MGI:1277215]	protein_coding	1.36332	0.347213	0.746156	unchanged	0.942685	0.514401	unchanged	0.125805	NA	unchanged	-0.377225	0.788419	unchanged	-1.16835	0.266288	unchanged	1.08752	1	unchanged	-0.267104	0.921362	unchanged	-1.61743	0.187143	unchanged
ENSMUSG00000006469	chr2	25228897	25234364	-	Slc34a3	solute carrier family 34 (sodium phosphate), member 3 [Source:MGI Symbol;Acc:MGI:2159410]	protein_coding	0.89416	-0.273564	0.951478	unchanged	0.575525	0.88227	unchanged	-0.355444	NA	unchanged	0	1	unchanged	-0.0628332	0.993475	unchanged	0	1	unchanged	-0.260619	NA	unchanged	0	1	unchanged
ENSMUSG00000006471	chr2	25244820	25256022	-	Ndor1	NADPH dependent diflavin oxidoreductase 1 [Source:MGI Symbol;Acc:MGI:1926047]	protein_coding	13.5518	-1.3064	2.44534e-05	Down	0.303779	0.375852	unchanged	0.28	0.699327	unchanged	0.520196	0.224921	unchanged	-0.0454679	0.936507	unchanged	0.44353	1	unchanged	-1.01636	0.0133763	Down	-0.587795	0.1623	unchanged
ENSMUSG00000006476	chr2	25054354	25062881	+	Nsmf	NMDA receptor synaptonuclear signaling and neuronal migration factor [Source:MGI Symbol;Acc:MGI:1861755]	protein_coding	0.732014	-1.31631	0.346715	unchanged	-0.123159	0.94858	unchanged	1.72316	NA	unchanged	2.13934	0.119691	unchanged	-0.772347	0.668153	unchanged	-0.66023	1	unchanged	-0.626517	NA	unchanged	-0.513453	NA	unchanged
ENSMUSG00000006490	chr13	27557994	27564606	-	Prl8a9	prolactin family8, subfamily a, member 9 [Source:MGI Symbol;Acc:MGI:1914560]	protein_coding	0.673482	0.214713	0.904995	unchanged	-0.14582	0.949566	unchanged	-0.404318	NA	unchanged	-1.45082	0.442365	unchanged	-1.46072	0.350034	unchanged	0.0436796	1	unchanged	-0.26062	NA	unchanged	-0.883494	NA	unchanged
ENSMUSG00000006494	chr2	71873223	71903858	+	Pdk1	pyruvate dehydrogenase kinase, isoenzyme 1 [Source:MGI Symbol;Acc:MGI:1926119]	protein_coding	21.4212	1.4351	0.0173389	Up	2.25355	7.13393e-05	Up	0.71049	0.651844	unchanged	-0.845608	0.207528	unchanged	-0.952271	0.148497	unchanged	0.0456138	1	unchanged	-0.618269	0.345509	unchanged	0.396121	0.62445	unchanged
ENSMUSG00000006498	chr10	79854426	79864771	+	Ptbp1	polypyrimidine tract binding protein 1 [Source:MGI Symbol;Acc:MGI:97791]	protein_coding	183.877	0.630364	0.000241281	unchanged	0.406403	0.0187016	unchanged	0.0776694	0.911123	unchanged	-0.236986	0.294055	unchanged	0.461623	0.0122972	unchanged	0.242054	1	unchanged	0.0187596	0.963772	unchanged	0.0714592	0.81841	unchanged
ENSMUSG00000006517	chr8	122433600	122443422	-	Mvd	mevalonate (diphospho) decarboxylase [Source:MGI Symbol;Acc:MGI:2179327]	protein_coding	14.708	-1.32113	0.000233134	Down	1.26885	1.61678e-05	Up	0.511093	0.344706	unchanged	-0.295357	0.672042	unchanged	-0.548964	0.198597	unchanged	0.594234	1	unchanged	-0.734015	0.0542222	unchanged	-0.704696	0.0330633	unchanged
ENSMUSG00000006519	chr8	122424775	122432930	-	Cyba	cytochrome b-245, alpha polypeptide [Source:MGI Symbol;Acc:MGI:1316658]	protein_coding	9.39759	-2.39524	5.75432e-08	Down	-1.11385	0.011653	Down	-0.428638	0.602581	unchanged	0.0544853	0.970885	unchanged	1.36152	0.0192777	Up	-0.0241192	1	unchanged	-0.120126	0.91399	unchanged	-0.848958	0.179309	unchanged
ENSMUSG00000006526	chr14	30825589	30877210	+	Stimate	STIM activating enhancer [Source:MGI Symbol;Acc:MGI:1921500]	protein_coding	18.017	0.222725	0.523621	unchanged	1.14162	3.8497e-06	Up	-0.0590892	0.962471	unchanged	0.0775899	0.887129	unchanged	-0.0634265	0.861817	unchanged	0.0642246	1	unchanged	-0.176472	0.684738	unchanged	-0.650089	0.0165816	unchanged
ENSMUSG00000006527	chr14	30714848	30822721	+	Sfmbt1	Scm-like with four mbt domains 1 [Source:MGI Symbol;Acc:MGI:1859609]	protein_coding	10.5034	0.10968	0.802442	unchanged	0.242546	0.48024	unchanged	-0.551386	0.432188	unchanged	-0.908622	0.0265868	unchanged	-0.868872	0.0712155	unchanged	-0.04308	1	unchanged	0.663523	0.0687142	unchanged	1.0211	0.00172376	Up
ENSMUSG00000006567	chr8	21992784	22060305	-	Atp7b	ATPase, Cu++ transporting, beta polypeptide [Source:MGI Symbol;Acc:MGI:103297]	protein_coding	1.89075	-3.22889	0.000111998	Down	-3.15241	0.000670128	Down	-0.353473	0.843827	unchanged	0.720003	0.640132	unchanged	-1.50605	0.300352	unchanged	0.939759	1	unchanged	0.458294	0.848128	unchanged	-0.0536718	0.980676	unchanged
ENSMUSG00000006575	chr11	102393402	102402555	+	Rundc3a	RUN domain containing 3A [Source:MGI Symbol;Acc:MGI:1858752]	protein_coding	12.005	-3.62008	1.98686e-18	Down	-0.523253	0.118766	unchanged	0.135057	0.894967	unchanged	1.3446	0.0136034	Up	-2.2075	0.000221796	Down	-0.163388	1	unchanged	-0.81161	0.0976412	unchanged	-1.77612	0.000168806	Down
ENSMUSG00000006576	chr1	75546265	75562172	+	Slc4a3	solute carrier family 4 (anion exchanger), member 3 [Source:MGI Symbol;Acc:MGI:109350]	protein_coding	2.80202	-3.04609	0.000219339	Down	2.06531	0.00483119	Up	-0.0585389	0.979827	unchanged	2.64468	0.00461324	Up	1.53306	0.179677	unchanged	0.62516	1	unchanged	1.01219	0.153303	unchanged	1.72048	0.016897	Up
ENSMUSG00000006585	chr8	122568014	122573554	+	Cdt1	chromatin licensing and DNA replication factor 1 [Source:MGI Symbol;Acc:MGI:1914427]	protein_coding	287.026	-0.624986	1.50149e-07	unchanged	-0.326864	0.00849351	unchanged	0.268222	0.188456	unchanged	-0.126327	0.484624	unchanged	-0.0746801	0.692411	unchanged	0.0108425	1	unchanged	0.248777	0.147437	unchanged	0.0166682	0.954668	unchanged
ENSMUSG00000006586	chr4	13743435	13893649	+	Runx1t1	RUNX1 translocation partner 1 [Source:MGI Symbol;Acc:MGI:104793]	protein_coding	6.61404	1.71307	0.0034802	Up	0.339688	0.635762	unchanged	-0.428097	0.840239	unchanged	-0.770319	0.295223	unchanged	-0.702081	0.347753	unchanged	-0.502442	1	unchanged	-0.209511	0.860644	unchanged	0.508353	0.630752	unchanged
ENSMUSG00000006587	chr8	122454207	122460733	-	Snai3	snail family zinc finger 3 [Source:MGI Symbol;Acc:MGI:1353563]	protein_coding	3.92671	-1.28634	0.15483	unchanged	1.74875	0.0116639	Up	-0.710323	0.729124	unchanged	0.039129	0.98742	unchanged	-3.49965	1.39e-05	Down	-0.355704	1	unchanged	-3.36322	0.00252442	Down	-3.14162	0.000380677	Down
ENSMUSG00000006589	chr8	122574634	122576909	-	Aprt	adenine phosphoribosyl transferase [Source:MGI Symbol;Acc:MGI:88061]	protein_coding	429.899	-1.96971	6.03792e-26	Down	-0.870672	7.07801e-06	unchanged	0.416167	0.227992	unchanged	1.0566	2.35508e-07	Up	2.19795	5.19e-30	Up	0.0125183	1	unchanged	0.143362	0.703437	unchanged	0.46794	0.066829	unchanged
ENSMUSG00000006599	chr7	46796102	46823800	+	Gtf2h1	general transcription factor II H, polypeptide 1 [Source:MGI Symbol;Acc:MGI:1277216]	protein_coding	85.4959	0.527023	0.000318156	unchanged	-0.675416	9.41638e-07	unchanged	-0.137888	0.752785	unchanged	-0.3154	0.0693664	unchanged	-0.417313	0.0278566	unchanged	-0.0353697	1	unchanged	-0.157474	0.532558	unchanged	-0.426898	0.0203603	unchanged
ENSMUSG00000006611	chr13	23702033	23710854	-	Hfe	homeostatic iron regulator [Source:MGI Symbol;Acc:MGI:109191]	protein_coding	0.325444	1.97653	NA	unchanged	0.936199	0.727478	unchanged	-0.355444	NA	unchanged	-2.19142	NA	unchanged	-0.423506	NA	unchanged	-0.316994	1	unchanged	1.462	NA	unchanged	0.571406	NA	unchanged
ENSMUSG00000006638	chr5	30950065	30955091	+	Abhd1	abhydrolase domain containing 1 [Source:MGI Symbol;Acc:MGI:1931013]	polymorphic_pseudogene	2.24647	-0.0191105	0.985876	unchanged	3.26741	0.000931941	Up	-0.829344	0.609515	unchanged	-1.41438	0.125947	unchanged	-1.37216	0.0500188	unchanged	0.0436796	1	unchanged	-1.87562	0.177126	unchanged	0.189876	0.921474	unchanged
ENSMUSG00000006641	chr5	31036035	31048924	-	Slc5a6	solute carrier family 5 (sodium-dependent vitamin transporter), member 6 [Source:MGI Symbol;Acc:MGI:2660847]	protein_coding	165.033	-3.04014	1.28376e-31	Down	-2.80629	4.3542e-27	Down	0.0112655	1	unchanged	1.42908	6.1932e-07	Up	3.21096	1.66e-27	Up	0.0320759	1	unchanged	0.420623	0.333656	unchanged	0.972648	0.00450681	unchanged
ENSMUSG00000006642	chr5	30968661	30977018	+	Tcf23	transcription factor 23 [Source:MGI Symbol;Acc:MGI:1934960]	protein_coding	4.48703	-0.685054	0.302305	unchanged	0.586106	0.37949	unchanged	0.8259	0.474491	unchanged	0.0904583	0.942718	unchanged	1.82927	0.035131	Up	0.960456	1	unchanged	-0.735119	0.445582	unchanged	0.668234	0.460534	unchanged
ENSMUSG00000006649	chr7	30458314	30487223	+	Nphs1	nephrosis 1, nephrin [Source:MGI Symbol;Acc:MGI:1859637]	protein_coding	3.60533	-0.634239	0.686868	unchanged	0.214853	0.907347	unchanged	0.704853	0.873226	unchanged	1.80765	0.220118	unchanged	1.01919	0.530702	unchanged	-0.677667	1	unchanged	0.100054	0.972409	unchanged	0.210733	0.938595	unchanged
ENSMUSG00000006651	chr7	30434981	30445535	-	Aplp1	amyloid beta (A4) precursor-like protein 1 [Source:MGI Symbol;Acc:MGI:88046]	protein_coding	11.2203	-1.27226	0.258093	unchanged	1.53838	0.132392	unchanged	-1.35414	0.561965	unchanged	-0.301999	0.894372	unchanged	-3.46641	0.000119674	Down	-0.312266	1	unchanged	-1.57942	0.268399	unchanged	-1.61516	0.0191204	Down
ENSMUSG00000006673	chr9	108516805	108560163	+	Qrich1	glutamine-rich 1 [Source:MGI Symbol;Acc:MGI:1916482]	protein_coding	123.832	0.537212	2.48037e-05	unchanged	1.37236	4.26067e-30	Up	0.0664072	0.894855	unchanged	-0.0738555	0.723398	unchanged	-0.226734	0.125762	unchanged	-0.312871	1	unchanged	0.00383089	0.990599	unchanged	-0.399247	0.00537138	unchanged
ENSMUSG00000006675	chr9	108578861	108597667	-	P4htm	prolyl 4-hydroxylase, transmembrane (endoplasmic reticulum) [Source:MGI Symbol;Acc:MGI:1921693]	protein_coding	2.20286	-1.8386	0.00581934	Down	0.234577	0.767079	unchanged	0.5535	0.633964	unchanged	0.735478	0.475972	unchanged	2.3127	0.0260778	Up	-0.177424	1	unchanged	-0.428902	0.726661	unchanged	0.96118	0.471297	unchanged
ENSMUSG00000006676	chr9	108490601	108502337	+	Usp19	ubiquitin specific peptidase 19 [Source:MGI Symbol;Acc:MGI:1918722]	protein_coding	66.2248	-0.960433	1.44063e-11	unchanged	-1.24581	3.54598e-19	Down	-0.168003	0.623097	unchanged	-0.321382	0.106848	unchanged	-0.126995	0.580687	unchanged	-0.0981575	1	unchanged	0.300022	0.180937	unchanged	-0.161378	0.503799	unchanged
ENSMUSG00000006678	chrX	93304766	93632155	-	Pola1	polymerase (DNA directed), alpha 1 [Source:MGI Symbol;Acc:MGI:99660]	protein_coding	31.1309	-0.275608	0.343885	unchanged	-0.492274	0.0613991	unchanged	0.0414624	0.97029	unchanged	0.255424	0.482996	unchanged	0.673007	0.0233752	unchanged	-0.131037	1	unchanged	0.131433	0.796605	unchanged	0.432774	0.266127	unchanged
ENSMUSG00000006699	chr4	137319695	137357720	-	Cdc42	cell division cycle 42 [Source:MGI Symbol;Acc:MGI:106211]	protein_coding	436.088	0.180966	0.106517	unchanged	-0.19716	0.0721145	unchanged	-0.0606603	0.873906	unchanged	0.0122569	0.960298	unchanged	0.537833	3.99e-07	unchanged	0.153363	1	unchanged	0.369246	0.00281411	unchanged	0.437955	0.000114876	unchanged
ENSMUSG00000006705	chr17	31564733	31607693	+	Pknox1	Pbx/knotted 1 homeobox [Source:MGI Symbol;Acc:MGI:1201409]	protein_coding	54.0106	-1.1511	3.43261e-09	Down	-1.54144	1.19818e-14	Down	-0.606727	0.0335988	unchanged	0.321539	0.229505	unchanged	0.452232	0.0720972	unchanged	-0.00112944	1	unchanged	0.259348	0.483041	unchanged	-0.329969	0.286298	unchanged
ENSMUSG00000006715	chr13	24751844	24761923	-	Gmnn	geminin [Source:MGI Symbol;Acc:MGI:1927344]	protein_coding	148.169	-0.56987	8.0206e-06	unchanged	-1.74086	2.20405e-46	Down	0.0525213	0.919068	unchanged	-0.38225	0.0131052	unchanged	-0.0517756	0.830027	unchanged	-0.184013	1	unchanged	0.126146	0.607306	unchanged	-0.0730945	0.771688	unchanged
ENSMUSG00000006717	chr13	24817947	24831540	-	Acot13	acyl-CoA thioesterase 13 [Source:MGI Symbol;Acc:MGI:1914084]	protein_coding	29.9846	0.693577	0.00238516	unchanged	0.464839	0.0250459	unchanged	0.275745	0.63054	unchanged	0.190661	0.542272	unchanged	0.0740169	0.836681	unchanged	-0.248877	1	unchanged	-0.158234	0.66802	unchanged	-0.0552833	0.89661	unchanged
ENSMUSG00000006720	chr13	21945093	21960779	+	Zfp184	zinc finger protein 184 (Kruppel-like) [Source:MGI Symbol;Acc:MGI:1922244]	protein_coding	3.1084	0.455568	0.391172	unchanged	-1.38437	0.00706364	Down	-0.557426	0.675829	unchanged	-1.4555	0.0204991	Down	-0.48028	0.598793	unchanged	-0.18745	1	unchanged	-0.812302	0.480141	unchanged	-0.0661455	0.956198	unchanged
ENSMUSG00000006728	chr10	127063533	127067920	+	Cdk4	cyclin-dependent kinase 4 [Source:MGI Symbol;Acc:MGI:88357]	protein_coding	294.001	-0.350854	0.00283809	unchanged	0.0747752	0.592453	unchanged	0.0122134	0.983896	unchanged	-0.165333	0.29062	unchanged	-0.244011	0.0631666	unchanged	-0.0352831	1	unchanged	0.0775543	0.719025	unchanged	-0.0350643	0.881818	unchanged
ENSMUSG00000006731	chr10	127165224	127172330	+	B4galnt1	beta-1,4-N-acetyl-galactosaminyl transferase 1 [Source:MGI Symbol;Acc:MGI:1342057]	protein_coding	5.29163	-3.47912	2.56739e-10	Down	-1.5255	0.00064	Down	-1.20694	0.0249673	Down	-2.84505	0.0089207	Down	-3.08165	0.00131692	Down	0.128365	1	unchanged	0.681355	0.368688	unchanged	0.300086	0.690907	unchanged
ENSMUSG00000006732	chr10	127041413	127046365	+	Mettl1	methyltransferase like 1 [Source:MGI Symbol;Acc:MGI:1339986]	protein_coding	28.9945	-0.263304	0.235923	unchanged	-0.331509	0.124285	unchanged	-0.0332512	0.969711	unchanged	0.294192	0.255136	unchanged	-0.445702	0.127188	unchanged	-0.278376	1	unchanged	-0.252283	0.47662	unchanged	-0.160439	0.661354	unchanged
ENSMUSG00000006736	chr10	127067279	127070264	-	Tspan31	tetraspanin 31 [Source:MGI Symbol;Acc:MGI:1914375]	protein_coding	64.3876	0.673254	6.4928e-05	unchanged	0.742355	1.21171e-06	unchanged	-0.0402634	0.958136	unchanged	-0.213137	0.339656	unchanged	0.101365	0.657955	unchanged	-0.0930083	1	unchanged	0.241108	0.2885	unchanged	0.182254	0.419095	unchanged
ENSMUSG00000006740	chr18	6201001	6242174	-	Kif5b	kinesin family member 5B [Source:MGI Symbol;Acc:MGI:1098268]	protein_coding	217.348	0.38452	0.0123269	unchanged	-0.636576	1.20189e-05	unchanged	-0.196958	0.584525	unchanged	-0.535095	0.00100642	unchanged	-0.569393	0.000533388	unchanged	-0.170868	1	unchanged	-0.0872539	0.769171	unchanged	-0.726212	1.01511e-05	unchanged
ENSMUSG00000006763	chr7	46686107	46710680	-	Saal1	serum amyloid A-like 1 [Source:MGI Symbol;Acc:MGI:1926185]	protein_coding	39.2026	0.877421	5.78206e-06	unchanged	0.598972	0.00126878	unchanged	0.185344	0.759252	unchanged	-0.21625	0.407669	unchanged	-0.0596204	0.858954	unchanged	-0.0117375	1	unchanged	0.0456746	0.907912	unchanged	0.391138	0.0949145	unchanged
ENSMUSG00000006782	chr11	100574903	100591729	+	Cnp	2',3'-cyclic nucleotide 3' phosphodiesterase [Source:MGI Symbol;Acc:MGI:88437]	protein_coding	2.72061	-3.76695	8.10351e-05	Down	1.55128	0.0740787	unchanged	0.755058	0.588476	unchanged	2.81473	0.0133579	Up	-1.539	0.0620758	unchanged	0.765673	1	unchanged	-0.738807	0.574562	unchanged	-0.798961	0.464818	unchanged
ENSMUSG00000006784	chr11	100545606	100572568	+	Ttc25	tetratricopeptide repeat domain 25 [Source:MGI Symbol;Acc:MGI:1921657]	protein_coding	0.74574	1.20402	0.318769	unchanged	-0.0515225	0.972692	unchanged	1.24185	NA	unchanged	-2.83256	0.0261207	Down	-0.0628333	0.983152	unchanged	-1.02909	1	unchanged	0.578992	NA	unchanged	1.35339	NA	unchanged
ENSMUSG00000006800	chr2	166073088	166155663	-	Sulf2	sulfatase 2 [Source:MGI Symbol;Acc:MGI:1919293]	protein_coding	61.392	1.73884	1.31889e-10	Up	1.69252	1.15979e-10	Up	0.19648	0.851804	unchanged	-0.212602	0.59315	unchanged	-0.949001	0.000273911	unchanged	0.248423	1	unchanged	-1.02555	0.00110804	Down	-1.31926	1.51383e-06	Down
ENSMUSG00000006818	chr17	13006845	13040063	+	Sod2	superoxide dismutase 2, mitochondrial [Source:MGI Symbol;Acc:MGI:98352]	protein_coding	614.33	0.622868	9.67638e-06	unchanged	0.414741	0.00385372	unchanged	-0.108402	0.816072	unchanged	-0.398627	0.0138499	unchanged	-0.525655	0.00041275	unchanged	-0.0889581	1	unchanged	0.137787	0.574562	unchanged	0.0142423	0.961596	unchanged
ENSMUSG00000006850	chr18	36735038	36742397	+	Tmco6	transmembrane and coiled-coil domains 6 [Source:MGI Symbol;Acc:MGI:1919233]	protein_coding	1.13697	0.41418	0.795066	unchanged	-0.562419	0.681275	unchanged	-0.00474394	NA	unchanged	0.0471048	0.98742	unchanged	-1.77258	0.155185	unchanged	0.267647	1	unchanged	0.903807	NA	unchanged	1.66472	0.223889	unchanged
ENSMUSG00000006906	chr6	83543210	83572729	-	Stambp	STAM binding protein [Source:MGI Symbol;Acc:MGI:1917777]	protein_coding	4.49349	-0.384529	0.511246	unchanged	-0.00286952	1	unchanged	-0.138484	0.943145	unchanged	1.11683	0.0326713	Up	0.340334	0.576567	unchanged	0.39201	1	unchanged	0.563102	0.377632	unchanged	0.269641	0.676502	unchanged
ENSMUSG00000006920	chr11	101191114	101226463	-	Ezh1	enhancer of zeste 1 polycomb repressive complex 2 subunit [Source:MGI Symbol;Acc:MGI:1097695]	protein_coding	24.6833	0.750698	0.000776482	unchanged	1.56688	1.92589e-13	Up	-0.267521	0.674426	unchanged	0.0437619	0.911106	unchanged	0.156237	0.636701	unchanged	0.0240112	1	unchanged	-0.0719963	0.855747	unchanged	0.543464	0.0198132	unchanged
ENSMUSG00000006930	chr11	100347326	100356128	-	Hap1	huntingtin-associated protein 1 [Source:MGI Symbol;Acc:MGI:1261831]	protein_coding	7.4633	1.23695	0.247326	unchanged	3.55506	4.92967e-11	Up	-1.022	0.759568	unchanged	-1.40802	0.283688	unchanged	-3.88726	3.38e-05	Down	-0.458042	1	unchanged	-0.664325	0.324805	unchanged	-1.12386	0.0322848	Down
ENSMUSG00000006931	chr11	100408455	100414836	-	P3h4	prolyl 3-hydroxylase family member 4 (non-enzymatic) [Source:MGI Symbol;Acc:MGI:1913430]	protein_coding	2.70423	-1.33528	0.058714	unchanged	0.668342	0.393169	unchanged	-0.345078	0.873226	unchanged	-1.62596	0.19371	unchanged	-2.37043	0.0217175	Down	-0.0872696	1	unchanged	-1.29707	0.262634	unchanged	-0.796163	0.364514	unchanged
ENSMUSG00000006932	chr9	120929215	120960507	+	Ctnnb1	catenin (cadherin associated protein), beta 1 [Source:MGI Symbol;Acc:MGI:88276]	protein_coding	262.276	0.975732	1.74029e-17	unchanged	0.435104	0.000151482	unchanged	0.273722	0.195142	unchanged	0.0607423	0.757625	unchanged	0.102992	0.52402	unchanged	-0.00882901	1	unchanged	0.107355	0.597094	unchanged	-0.072063	0.729754	unchanged
ENSMUSG00000006941	chr9	120492231	120495330	+	Eif1b	eukaryotic translation initiation factor 1B [Source:MGI Symbol;Acc:MGI:1916219]	protein_coding	42.344	-1.16449	3.94832e-11	Down	-0.918063	8.48397e-08	unchanged	0.669177	0.000670395	unchanged	0.741402	0.000259938	unchanged	0.904662	5.27e-06	unchanged	0.0278297	1	unchanged	0.4324	0.0830327	unchanged	0.15141	0.614325	unchanged
ENSMUSG00000006958	chr16	20733126	20742384	+	Chrd	chordin [Source:MGI Symbol;Acc:MGI:1313268]	protein_coding	0.403725	0.808454	0.812304	unchanged	0.936198	0.770521	unchanged	0	NA	unchanged	-0.662671	NA	unchanged	-0.784179	NA	unchanged	0	1	unchanged	0.100053	NA	unchanged	-0.905895	NA	unchanged
ENSMUSG00000006998	chr16	20651651	20663414	+	Psmd2	proteasome (prosome, macropain) 26S subunit, non-ATPase, 2 [Source:MGI Symbol;Acc:MGI:1096584]	protein_coding	97.6256	0.566525	3.25878e-05	unchanged	0.312276	0.032895	unchanged	-0.0418811	0.943145	unchanged	0.0335891	0.899079	unchanged	0.0602439	0.803506	unchanged	0.0263321	1	unchanged	-0.122103	0.631257	unchanged	0.0344049	0.910206	unchanged
ENSMUSG00000007021	chr17	24685091	24689955	-	Syngr3	synaptogyrin 3 [Source:MGI Symbol;Acc:MGI:1341881]	protein_coding	2.71164	-2.53145	0.00361907	Down	-4.33779	1.34508e-06	Down	1.58371	0.0312286	Up	2.37254	0.0159173	Up	4.03245	2.42e-05	Up	-0.528418	1	unchanged	2.12214	0.172169	unchanged	-0.14994	0.955942	unchanged
ENSMUSG00000007029	chr17	35000986	35016322	+	Vars	valyl-tRNA synthetase [Source:MGI Symbol;Acc:MGI:90675]	protein_coding	68.8593	-0.527486	0.00528469	unchanged	0.411426	0.0203637	unchanged	-0.0572018	0.941069	unchanged	-0.567678	0.0139319	unchanged	-0.319988	0.11354	unchanged	0.0105728	1	unchanged	-0.0839445	0.80684	unchanged	-0.0672138	0.838868	unchanged
ENSMUSG00000007034	chr17	34914465	34930436	+	Slc44a4	solute carrier family 44, member 4 [Source:MGI Symbol;Acc:MGI:1917379]	protein_coding	21.2188	1.18517	0.0060963	Up	-0.17139	0.75122	unchanged	0.0947126	0.960852	unchanged	1.03041	0.019402	Up	2.38711	3.48e-10	Up	0.571726	1	unchanged	1.56397	0.000752611	Up	1.14538	0.0140071	Up
ENSMUSG00000007035	chr17	35028604	35046745	-	Msh5	mutS homolog 5 [Source:MGI Symbol;Acc:MGI:1329021]	protein_coding	1.19373	-0.504572	0.73057	unchanged	-0.602019	0.542059	unchanged	-0.946161	NA	unchanged	-0.661708	0.739378	unchanged	-0.255431	0.858976	unchanged	-0.0854835	1	unchanged	0.54805	NA	unchanged	-0.365856	0.792314	unchanged
ENSMUSG00000007036	chr17	35089262	35102987	+	Abhd16a	abhydrolase domain containing 16A [Source:MGI Symbol;Acc:MGI:99476]	protein_coding	18.6346	-0.0193393	0.970765	unchanged	0.0398208	0.935762	unchanged	0.920256	0.0628708	unchanged	1.00336	0.00655969	Up	1.39859	7.86e-06	Up	-0.0117052	1	unchanged	0.198592	0.742373	unchanged	-0.338366	0.497338	unchanged
ENSMUSG00000007038	chr17	34931252	34935953	+	Neu1	neuraminidase 1 [Source:MGI Symbol;Acc:MGI:97305]	protein_coding	38.1466	-0.975874	0.00976277	unchanged	-1.30376	0.000341081	Down	-0.449663	0.607474	unchanged	1.40793	0.000322789	Up	2.33243	5.74e-11	Up	0.7865	1	unchanged	1.08708	0.0193882	Up	1.20946	0.0034338	Up
ENSMUSG00000007039	chr17	35059034	35062095	+	Ddah2	dimethylarginine dimethylaminohydrolase 2 [Source:MGI Symbol;Acc:MGI:1859016]	protein_coding	28.1426	-0.91152	0.0137599	unchanged	0.308353	0.447179	unchanged	0.559898	0.415827	unchanged	-1.19384	0.0104967	Down	-2.58952	2.35e-12	Down	0.141677	1	unchanged	-1.33796	0.00252442	Down	-1.68914	6.33853e-05	Down
ENSMUSG00000007041	chr17	35049965	35058749	+	Clic1	chloride intracellular channel 1 [Source:MGI Symbol;Acc:MGI:2148924]	protein_coding	4.05714	4.17002	1.75821e-06	Up	1.22767	0.0896464	unchanged	0.365902	0.943145	unchanged	-2.94238	0.00222481	Down	-1.43713	0.0628245	unchanged	-0.120653	1	unchanged	-0.144259	0.912269	unchanged	-0.509987	0.483981	unchanged
ENSMUSG00000007050	chr17	34981861	34985891	+	Lsm2	LSM2 homolog, U6 small nuclear RNA and mRNA degradation associated [Source:MGI Symbol;Acc:MGI:90676]	protein_coding	140.359	-0.907592	2.67985e-12	unchanged	0.0158765	0.940286	unchanged	-0.128821	0.7188	unchanged	0.282085	0.0938153	unchanged	0.124694	0.498727	unchanged	-0.281314	1	unchanged	0.242255	0.209688	unchanged	-0.175529	0.363108	unchanged
ENSMUSG00000007080	chr5	110286305	110337474	+	Pole	polymerase (DNA directed), epsilon [Source:MGI Symbol;Acc:MGI:1196391]	protein_coding	42.4912	0.276051	0.168275	unchanged	0.875275	1.00828e-06	unchanged	-0.0174732	0.987121	unchanged	-0.307213	0.187943	unchanged	-0.681668	0.000652223	unchanged	0.0810419	1	unchanged	-0.0277196	0.945928	unchanged	-0.0529926	0.882786	unchanged
ENSMUSG00000007097	chr1	172271708	172298064	-	Atp1a2	ATPase, Na+/K+ transporting, alpha 2 polypeptide [Source:MGI Symbol;Acc:MGI:88106]	protein_coding	0.186028	0.447778	NA	unchanged	0	NA	unchanged	0	NA	unchanged	0.0586744	NA	unchanged	0	NA	unchanged	0.404349	1	unchanged	0	NA	unchanged	0	NA	unchanged
ENSMUSG00000007122	chr1	172209893	172219868	-	Casq1	calsequestrin 1 [Source:MGI Symbol;Acc:MGI:1309468]	protein_coding	0.130882	0	NA	unchanged	0	NA	unchanged	0	NA	unchanged	0	NA	unchanged	0	NA	unchanged	0.404349	1	unchanged	0	NA	unchanged	0	NA	unchanged
ENSMUSG00000007207	chr5	135023481	135051100	+	Stx1a	syntaxin 1A (brain) [Source:MGI Symbol;Acc:MGI:109355]	protein_coding	6.4914	-3.64395	2.47677e-09	Down	-1.75678	0.000199948	Down	0.888299	0.130462	unchanged	1.6407	0.0409445	Up	0.578875	0.506893	unchanged	-0.240471	1	unchanged	0.373981	0.711672	unchanged	0.621973	0.48756	unchanged
ENSMUSG00000007216	chr6	48602062	48623227	+	Zfp775	zinc finger protein 775 [Source:MGI Symbol;Acc:MGI:2683557]	protein_coding	10.866	-0.49365	0.365595	unchanged	1.0768	0.0292656	Up	-0.340218	0.821012	unchanged	0.840471	0.143302	unchanged	1.27291	0.0251399	Up	-0.280915	1	unchanged	-0.349781	0.687439	unchanged	0.364433	0.629505	unchanged
ENSMUSG00000007279	chr7	109798675	109865679	-	Scube2	signal peptide, CUB domain, EGF-like 2 [Source:MGI Symbol;Acc:MGI:1928765]	protein_coding	3.38782	4.71215	1.6166e-06	Up	3.87025	0.000128868	Up	-0.355445	0.946499	unchanged	0.0590668	0.974008	unchanged	1.68174	0.025721	Up	-0.316994	1	unchanged	0.607396	0.62167	unchanged	-0.230412	0.882754	unchanged
ENSMUSG00000007338	chr19	6053621	6057785	-	Mrpl49	mitochondrial ribosomal protein L49 [Source:MGI Symbol;Acc:MGI:108180]	protein_coding	92.3652	0.128746	0.369505	unchanged	-0.0741282	0.62209	unchanged	0.26502	0.204312	unchanged	0.249895	0.0840081	unchanged	0.311332	0.040239	unchanged	-0.0265194	1	unchanged	0.152097	0.444485	unchanged	0.204741	0.24405	unchanged
ENSMUSG00000007379	chr3	103102603	103169769	+	Dennd2c	DENN/MADD domain containing 2C [Source:MGI Symbol;Acc:MGI:3036254]	protein_coding	13.8468	2.74496	1.13789e-12	Up	2.23834	1.01681e-08	Up	-0.336819	0.843263	unchanged	-0.450835	0.295022	unchanged	-1.06733	0.00696196	Down	-0.383555	1	unchanged	-0.776992	0.108318	unchanged	-0.939083	0.0511002	unchanged
ENSMUSG00000007411	chr12	111574522	111656221	+	Mark3	MAP/microtubule affinity regulating kinase 3 [Source:MGI Symbol;Acc:MGI:1341865]	protein_coding	44.9911	0.115411	0.598494	unchanged	-1.16884	5.87746e-13	Down	-0.0405484	0.956857	unchanged	0.421421	0.0302394	unchanged	0.530983	0.00423362	unchanged	-0.105912	1	unchanged	0.316078	0.243137	unchanged	-0.336863	0.158145	unchanged
ENSMUSG00000007415	chr5	3632931	3657185	-	Gatad1	GATA zinc finger domain containing 1 [Source:MGI Symbol;Acc:MGI:1914460]	protein_coding	60.5803	0.730205	0.000807181	unchanged	0.889964	1.20751e-05	unchanged	0.155599	0.835605	unchanged	0.0472656	0.90557	unchanged	0.843374	8.05e-05	unchanged	0.146512	1	unchanged	0.267118	0.398965	unchanged	0.190817	0.547294	unchanged
ENSMUSG00000007458	chr6	122308719	122317680	+	M6pr	mannose-6-phosphate receptor, cation dependent [Source:MGI Symbol;Acc:MGI:96904]	protein_coding	95.3702	-0.211208	0.114908	unchanged	-0.835586	1.13789e-12	unchanged	-0.15855	0.588476	unchanged	0.462405	0.000452987	unchanged	0.46968	0.00159046	unchanged	0.144436	1	unchanged	0.134499	0.547761	unchanged	-0.0424352	0.874614	unchanged
ENSMUSG00000007476	chr2	30237714	30263790	+	Lrrc8a	leucine rich repeat containing 8A VRAC subunit A [Source:MGI Symbol;Acc:MGI:2652847]	protein_coding	26.7662	-0.603077	0.00435287	unchanged	0.347608	0.109544	unchanged	-0.0665739	0.933061	unchanged	0.236794	0.438949	unchanged	-0.756601	0.00167918	unchanged	-0.0881634	1	unchanged	0.0429498	0.924508	unchanged	0.0945916	0.7967	unchanged
ENSMUSG00000007564	chr17	20945310	20965916	+	Ppp2r1a	protein phosphatase 2, regulatory subunit A, alpha [Source:MGI Symbol;Acc:MGI:1926334]	protein_coding	304.706	0.467339	5.00712e-06	unchanged	0.721342	1.69936e-13	unchanged	-0.14272	0.571026	unchanged	-0.319324	0.0059485	unchanged	-0.259715	0.0222824	unchanged	0.0454628	1	unchanged	-0.146622	0.35201	unchanged	-0.000474233	1	unchanged
ENSMUSG00000007570	chr17	28313518	28326572	+	Fance	Fanconi anemia, complementation group E [Source:MGI Symbol;Acc:MGI:1920025]	protein_coding	16.7451	-0.496812	0.0712837	unchanged	1.23817	3.62691e-07	Up	0.0497461	0.961552	unchanged	0.363502	0.299277	unchanged	-0.0452944	0.917543	unchanged	0.218473	1	unchanged	-0.232387	0.555856	unchanged	0.211683	0.567567	unchanged
ENSMUSG00000007589	chr14	55674688	55681820	-	Tinf2	Terf1 (TRF1)-interacting nuclear factor 2 [Source:MGI Symbol;Acc:MGI:107246]	protein_coding	66.0447	-0.166809	0.227612	unchanged	-0.577713	8.91852e-07	unchanged	-0.0532958	0.913204	unchanged	-0.190224	0.258409	unchanged	-0.340818	0.0367256	unchanged	-0.0421032	1	unchanged	-0.0390168	0.889	unchanged	-0.012004	0.965	unchanged
ENSMUSG00000007594	chr8	70083456	70090862	+	Hapln4	hyaluronan and proteoglycan link protein 4 [Source:MGI Symbol;Acc:MGI:2679531]	protein_coding	3.28714	-2.74836	0.00101612	Down	-2.25539	0.00129503	Down	0.633229	0.691262	unchanged	0.839493	0.541239	unchanged	0.862764	0.591001	unchanged	0.101695	1	unchanged	-0.0996361	0.959745	unchanged	-1.44837	0.192761	unchanged
ENSMUSG00000007603	chr17	56764756	56770093	+	Dus3l	dihydrouridine synthase 3-like (S. cerevisiae) [Source:MGI Symbol;Acc:MGI:2147092]	protein_coding	60.5458	-0.92052	1.38901e-07	unchanged	0.12302	0.555488	unchanged	-0.163604	0.733374	unchanged	-0.226229	0.397922	unchanged	-0.503735	0.0224872	unchanged	0.0243259	1	unchanged	-0.240786	0.381585	unchanged	0.0234672	0.955942	unchanged
ENSMUSG00000007610	chr8	71488102	71499583	+	Gtpbp3	GTP binding protein 3 [Source:MGI Symbol;Acc:MGI:1917609]	protein_coding	20.5726	-0.155067	0.59193	unchanged	-0.247239	0.346125	unchanged	-0.0771828	0.933432	unchanged	-0.105702	0.798279	unchanged	-0.809699	0.00551893	unchanged	0.139022	1	unchanged	-0.542544	0.122822	unchanged	-0.674658	0.0184727	unchanged
ENSMUSG00000007613	chr4	47353221	47414931	+	Tgfbr1	transforming growth factor, beta receptor I [Source:MGI Symbol;Acc:MGI:98728]	protein_coding	14.9953	-0.74648	0.0181738	unchanged	-0.425693	0.167755	unchanged	-0.15936	0.879452	unchanged	-0.388841	0.41379	unchanged	-0.591743	0.136924	unchanged	-0.0225904	1	unchanged	-0.32388	0.53283	unchanged	-0.99371	0.00697663	unchanged
ENSMUSG00000007617	chr13	93299634	93405129	+	Homer1	homer scaffolding protein 1 [Source:MGI Symbol;Acc:MGI:1347345]	protein_coding	24.7611	-0.435714	0.0919928	unchanged	0.223765	0.386972	unchanged	-0.348928	0.504495	unchanged	0.240216	0.503287	unchanged	-0.461609	0.130114	unchanged	0.104838	1	unchanged	-0.110184	0.807399	unchanged	-0.149401	0.739769	unchanged
ENSMUSG00000007646	chr11	87376644	87404954	-	Rad51c	RAD51 paralog C [Source:MGI Symbol;Acc:MGI:2150020]	protein_coding	11.4766	-0.213138	0.574177	unchanged	-0.531511	0.1152	unchanged	0.0788556	0.949003	unchanged	-0.524434	0.223938	unchanged	-0.601132	0.154051	unchanged	-0.0621486	1	unchanged	-0.0558352	0.944803	unchanged	-0.547043	0.239083	unchanged
ENSMUSG00000007655	chr6	17306334	17341452	+	Cav1	caveolin 1, caveolae protein [Source:MGI Symbol;Acc:MGI:102709]	protein_coding	0.322522	-0.634238	NA	unchanged	-1.8567	0.489188	unchanged	3.11638	NA	unchanged	0	NA	unchanged	0	NA	unchanged	-1.66721	1	unchanged	0	NA	unchanged	0	NA	unchanged
ENSMUSG00000007656	chr9	75037613	75060313	+	Arpp19	cAMP-regulated phosphoprotein 19 [Source:MGI Symbol;Acc:MGI:1891691]	protein_coding	127.439	0.623124	8.66948e-08	unchanged	0.024042	0.892739	unchanged	-0.167792	0.567236	unchanged	-0.357787	0.00714547	unchanged	0.285877	0.0499562	unchanged	-0.115321	1	unchanged	0.31387	0.0408797	unchanged	0.413619	0.00195694	unchanged
ENSMUSG00000007659	chr2	152780667	152831728	-	Bcl2l1	BCL2-like 1 [Source:MGI Symbol;Acc:MGI:88139]	protein_coding	14.35	-1.22343	3.63716e-05	Down	0.30128	0.357017	unchanged	0.0298402	0.981146	unchanged	0.432055	0.315861	unchanged	0.360905	0.271506	unchanged	-0.12713	1	unchanged	-0.260217	0.618686	unchanged	-0.120322	0.815128	unchanged
ENSMUSG00000007670	chr17	57021050	57031522	-	Khsrp	KH-type splicing regulatory protein [Source:MGI Symbol;Acc:MGI:1336214]	protein_coding	71.4467	0.153078	0.43913	unchanged	0.993083	1.79239e-09	unchanged	0.0045526	1	unchanged	-0.112125	0.672339	unchanged	-0.157182	0.510381	unchanged	-0.020664	1	unchanged	0.119434	0.697566	unchanged	0.012432	0.972083	unchanged
ENSMUSG00000007721	chr8	70868226	70873935	-	Ccdc124	coiled-coil domain containing 124 [Source:MGI Symbol;Acc:MGI:1916403]	protein_coding	77.6255	-1.69507	5.05488e-17	Down	-0.741409	0.00039738	unchanged	0.215006	0.683877	unchanged	0.583032	0.0196476	unchanged	0.560029	0.0226776	unchanged	-0.0445836	1	unchanged	-0.133311	0.752787	unchanged	-0.151587	0.688527	unchanged
ENSMUSG00000007739	chr11	22990518	23003780	+	Cct4	chaperonin containing Tcp1, subunit 4 (delta) [Source:MGI Symbol;Acc:MGI:104689]	protein_coding	454.489	0.618115	1.3696e-09	unchanged	-0.52704	2.17692e-07	unchanged	-0.150752	0.540021	unchanged	-0.0657493	0.700901	unchanged	-0.0313645	0.861817	unchanged	-0.017111	1	unchanged	-0.0308929	0.892373	unchanged	0.291789	0.0239536	unchanged
ENSMUSG00000007777	chr11	51685385	51688874	-	0610009B22Rik	RIKEN cDNA 0610009B22 gene [Source:MGI Symbol;Acc:MGI:1913300]	protein_coding	50.1926	-0.210221	0.25705	unchanged	-0.960299	2.76648e-09	unchanged	0.122683	0.809108	unchanged	0.144371	0.562072	unchanged	-0.119834	0.671526	unchanged	0.0863898	1	unchanged	0.028104	0.947848	unchanged	0.0062937	0.988009	unchanged
ENSMUSG00000007783	chr7	44959371	44974851	-	Cpt1c	carnitine palmitoyltransferase 1c [Source:MGI Symbol;Acc:MGI:2446526]	protein_coding	2.78712	-0.916586	0.45352	unchanged	-0.77402	0.481833	unchanged	-0.998193	0.7188	unchanged	-0.661538	0.731399	unchanged	-1.12473	0.211239	unchanged	-0.257017	1	unchanged	0.360691	0.86276	unchanged	-1.24491	0.37141	unchanged
ENSMUSG00000007812	chr5	145231714	145247302	+	Zfp655	zinc finger protein 655 [Source:MGI Symbol;Acc:MGI:1919861]	protein_coding	100.426	-0.0727309	0.735761	unchanged	-0.112958	0.5638	unchanged	0.483124	0.0372683	unchanged	-0.151444	0.531062	unchanged	0.13834	0.546516	unchanged	-0.0706665	1	unchanged	-0.285557	0.239069	unchanged	-0.564939	0.00463979	unchanged
ENSMUSG00000007815	chr9	108306128	108337934	+	Rhoa	ras homolog family member A [Source:MGI Symbol;Acc:MGI:1096342]	protein_coding	188.208	-0.191737	0.114327	unchanged	-0.884685	7.43734e-17	unchanged	0.299423	0.0753203	unchanged	0.155781	0.295102	unchanged	0.23446	0.0872614	unchanged	-0.0268437	1	unchanged	0.04694	0.842755	unchanged	0.199409	0.196801	unchanged
ENSMUSG00000007817	chr14	25459184	25666743	+	Zmiz1	zinc finger, MIZ-type containing 1 [Source:MGI Symbol;Acc:MGI:3040693]	protein_coding	98.7359	-0.251689	0.199365	unchanged	0.50754	0.00414996	unchanged	0.00876413	1	unchanged	-0.0580622	0.863585	unchanged	-0.0286839	0.924612	unchanged	-0.118198	1	unchanged	-0.0128868	0.975323	unchanged	-0.167048	0.548175	unchanged
ENSMUSG00000007827	chr6	118501307	118562226	-	Ankrd26	ankyrin repeat domain 26 [Source:MGI Symbol;Acc:MGI:1917887]	protein_coding	6.05269	1.49821	0.00172663	Up	0.225201	0.693534	unchanged	-0.534187	0.752561	unchanged	-1.487	0.00573011	Down	0.433144	0.489728	unchanged	-0.646317	1	unchanged	1.02137	0.0576551	unchanged	-0.585863	0.345294	unchanged
ENSMUSG00000007833	chr7	45140683	45154584	-	Aldh16a1	aldehyde dehydrogenase 16 family, member A1 [Source:MGI Symbol;Acc:MGI:1916998]	protein_coding	30.1532	0.417248	0.104677	unchanged	1.21382	2.14577e-09	Up	-0.109774	0.913204	unchanged	0.210331	0.528721	unchanged	-0.500655	0.036347	unchanged	-0.357801	1	unchanged	-0.260848	0.408036	unchanged	-0.0297119	0.947529	unchanged
ENSMUSG00000007836	chr13	58125878	58128556	-	Hnrnpa0	heterogeneous nuclear ribonucleoprotein A0 [Source:MGI Symbol;Acc:MGI:1924384]	protein_coding	263.341	0.403043	0.0151876	unchanged	0.616851	7.27362e-05	unchanged	0.13354	0.782657	unchanged	-0.359062	0.0587417	unchanged	-0.526949	0.00183326	unchanged	-0.197951	1	unchanged	0.171963	0.51145	unchanged	-0.23797	0.275797	unchanged
ENSMUSG00000007837	chr7	45053583	45062677	-	Prrg2	proline-rich Gla (G-carboxyglutamic acid) polypeptide 2 [Source:MGI Symbol;Acc:MGI:1929596]	protein_coding	19.5401	0.511857	0.118181	unchanged	0.981182	0.000688439	unchanged	0.0603568	0.964003	unchanged	0.152062	0.754355	unchanged	0.745659	0.0120709	unchanged	-0.456874	1	unchanged	0.458097	0.246735	unchanged	0.751682	0.0164909	unchanged
ENSMUSG00000007850	chr11	50376989	50386528	+	Hnrnph1	heterogeneous nuclear ribonucleoprotein H1 [Source:MGI Symbol;Acc:MGI:1891925]	protein_coding	360.309	-0.811088	5.17427e-08	unchanged	-0.924047	2.11997e-10	unchanged	0.0596936	0.924596	unchanged	-0.230116	0.25895	unchanged	0.0598975	0.809139	unchanged	0.0633068	1	unchanged	0.155505	0.555304	unchanged	-0.153111	0.526811	unchanged
ENSMUSG00000007867	chr12	86082540	86162459	+	Ift43	intraflagellar transport 43 [Source:MGI Symbol;Acc:MGI:1923661]	protein_coding	19.6763	1.15115	4.8759e-05	Up	1.12551	6.74071e-06	Up	-0.204665	0.86391	unchanged	-0.396114	0.250527	unchanged	-0.506616	0.0695795	unchanged	0.192017	1	unchanged	-0.133829	0.776772	unchanged	-0.342282	0.305443	unchanged
ENSMUSG00000007872	chr4	136143496	136145755	+	Id3	inhibitor of DNA binding 3 [Source:MGI Symbol;Acc:MGI:96398]	protein_coding	223.412	-1.74538	5.25236e-08	Down	0.424858	0.249075	unchanged	-0.254092	0.80783	unchanged	-2.20012	2.43997e-10	Down	-3.36005	7.17e-24	Down	0.0237671	1	unchanged	-1.85218	2.56923e-07	Down	-2.58018	1.12092e-14	Down
ENSMUSG00000007880	chr4	133679007	133756769	-	Arid1a	AT rich interactive domain 1A (SWI-like) [Source:MGI Symbol;Acc:MGI:1935147]	protein_coding	238.083	0.241676	0.115688	unchanged	-0.323513	0.0267902	unchanged	-0.133766	0.743246	unchanged	0.145497	0.470292	unchanged	-0.0882077	0.682212	unchanged	-0.468655	0.553579	unchanged	0.237688	0.260504	unchanged	0.198471	0.324093	unchanged
ENSMUSG00000007888	chr8	70493157	70504081	+	Crlf1	cytokine receptor-like factor 1 [Source:MGI Symbol;Acc:MGI:1340030]	protein_coding	6.98518	-0.178685	0.797437	unchanged	0.992757	0.061743	unchanged	-0.332688	0.851629	unchanged	1.54405	0.00225541	Up	2.22584	7.82e-06	Up	0.772946	1	unchanged	1.38897	0.00838521	Up	0.755	0.18526	unchanged
ENSMUSG00000007891	chr7	142375910	142388038	-	Ctsd	cathepsin D [Source:MGI Symbol;Acc:MGI:88562]	protein_coding	259.077	-0.479374	0.00340355	unchanged	0.0153335	0.951876	unchanged	0.174925	0.67396	unchanged	0.457536	0.0119827	unchanged	1.36737	3.39e-17	Up	0.201426	1	unchanged	0.180319	0.502668	unchanged	0.491843	0.0108214	unchanged
ENSMUSG00000007892	chr9	61913283	61914542	-	Rplp1	ribosomal protein, large, P1 [Source:MGI Symbol;Acc:MGI:1927099]	protein_coding	6286.07	-0.946026	7.62768e-28	unchanged	0.60166	6.05489e-12	unchanged	0.0581419	0.863421	unchanged	0.212809	0.0489088	unchanged	0.0675566	0.597979	unchanged	-0.0778484	1	unchanged	0.228337	0.0574254	unchanged	0.216934	0.0552095	unchanged
ENSMUSG00000007908	chr9	76014854	76136350	+	Hmgcll1	3-hydroxymethyl-3-methylglutaryl-Coenzyme A lyase-like 1 [Source:MGI Symbol;Acc:MGI:2446108]	protein_coding	0.153169	0	NA	unchanged	0	NA	unchanged	0	NA	unchanged	0	NA	unchanged	0.658507	NA	unchanged	0.404349	1	unchanged	0	NA	unchanged	0	NA	unchanged
ENSMUSG00000007944	chr7	27653914	27657346	+	Ttc9b	tetratricopeptide repeat domain 9B [Source:MGI Symbol;Acc:MGI:1920282]	protein_coding	0.815062	-1.62316	0.226069	unchanged	0.626465	0.643184	unchanged	-1.03881	NA	unchanged	-0.662672	0.771182	unchanged	-2.32012	0.0840042	unchanged	0.781556	1	unchanged	-2.20141	NA	unchanged	-0.0142535	0.996384	unchanged
ENSMUSG00000007946	chr7	101818312	101822726	+	Phox2a	paired-like homeobox 2a [Source:MGI Symbol;Acc:MGI:106633]	protein_coding	1.29834	-2.81997	0.0157054	Down	-0.780836	0.580965	unchanged	-2.1805	NA	unchanged	0	1	unchanged	-0.423507	0.839468	unchanged	0.380815	1	unchanged	0.10999	NA	unchanged	-2.06456	0.159656	unchanged
ENSMUSG00000007950	chr8	71456704	71463655	-	Abhd8	abhydrolase domain containing 8 [Source:MGI Symbol;Acc:MGI:1918946]	protein_coding	6.70764	-1.75266	0.00534117	Down	-0.645119	0.256877	unchanged	-0.169534	0.935145	unchanged	0.14485	0.912912	unchanged	-0.720598	0.281228	unchanged	0.210042	1	unchanged	0.693002	0.394349	unchanged	-0.365571	0.653419	unchanged
ENSMUSG00000007987	chr5	136908149	136915404	+	Ift22	intraflagellar transport 22 [Source:MGI Symbol;Acc:MGI:1914536]	protein_coding	7.88155	0.970226	0.011581	unchanged	1.99393	1.09548e-06	Up	-0.153417	0.929252	unchanged	-0.370136	0.454963	unchanged	-0.0876668	0.869384	unchanged	0.303439	1	unchanged	0.0543256	0.943157	unchanged	0.326837	0.496978	unchanged
ENSMUSG00000007989	chr14	65192448	65262463	-	Fzd3	frizzled class receptor 3 [Source:MGI Symbol;Acc:MGI:108476]	protein_coding	11.5507	-2.24539	9.81325e-14	Down	-2.51049	5.05171e-17	Down	0.0115321	1	unchanged	0.649951	0.13864	unchanged	0.36207	0.489332	unchanged	-0.283704	1	unchanged	0.514523	0.370536	unchanged	-0.228061	0.750148	unchanged
ENSMUSG00000008028	chr7	44360042	44385820	-	1700008O03Rik	RIKEN cDNA 1700008O03 gene [Source:MGI Symbol;Acc:MGI:1916599]	protein_coding	0.738913	-0.273565	0.923193	unchanged	-0.506494	0.843571	unchanged	-0.355444	NA	unchanged	0	1	unchanged	-2.38004	0.266213	unchanged	-0.316994	1	unchanged	-0.26062	NA	unchanged	-0.510614	NA	unchanged
ENSMUSG00000008035	chrX	10715012	10719690	+	Mid1ip1	Mid1 interacting protein 1 (gastrulation specific G12-like (zebrafish)) [Source:MGI Symbol;Acc:MGI:1915291]	protein_coding	7.68423	-2.49624	0.0297209	Down	-0.59278	0.665072	unchanged	-0.605169	0.873226	unchanged	2.08532	0.123865	unchanged	-0.454932	0.810455	unchanged	0.556826	1	unchanged	-0.939125	0.663268	unchanged	-1.99773	0.174243	unchanged
ENSMUSG00000008036	chr7	16738409	16749294	+	Ap2s1	adaptor-related protein complex 2, sigma 1 subunit [Source:MGI Symbol;Acc:MGI:2141861]	protein_coding	70.4705	0.132405	0.571997	unchanged	1.65438	3.0449e-20	Up	0.249016	0.571318	unchanged	0.405627	0.0630575	unchanged	0.700586	0.0001972	unchanged	-0.34772	1	unchanged	0.194571	0.506063	unchanged	0.0975067	0.767556	unchanged
ENSMUSG00000008090	chr5	108692381	108706924	+	Fgfrl1	fibroblast growth factor receptor-like 1 [Source:MGI Symbol;Acc:MGI:2150920]	protein_coding	1.98056	-0.0597592	0.965226	unchanged	0.291946	0.735438	unchanged	-0.507841	0.872636	unchanged	1.0527	0.271631	unchanged	-0.160033	0.88576	unchanged	0.210692	1	unchanged	-0.200164	0.890424	unchanged	-0.300933	0.758931	unchanged
ENSMUSG00000008129	chr8	84148024	84172590	+	4930432K21Rik	RIKEN cDNA 4930432K21 gene [Source:MGI Symbol;Acc:MGI:1921916]	protein_coding	2.23218	-3.54742	0.000104119	Down	-1.11497	0.199357	unchanged	-1.85956	0.0880326	unchanged	-0.982962	0.590192	unchanged	0.293482	0.884335	unchanged	0.225342	1	unchanged	0.448318	0.787072	unchanged	-0.211739	0.903064	unchanged
ENSMUSG00000008136	chr1	43123073	43196984	-	Fhl2	four and a half LIM domains 2 [Source:MGI Symbol;Acc:MGI:1338762]	protein_coding	10.8085	0.616697	0.298186	unchanged	0.582834	0.307038	unchanged	-0.325785	0.870463	unchanged	-1.94892	0.00231158	Down	-1.31952	0.0257386	Down	0.524061	1	unchanged	0.905989	0.192521	unchanged	-0.0837349	0.938595	unchanged
ENSMUSG00000008140	chr7	44489936	44496529	-	Emc10	ER membrane protein complex subunit 10 [Source:MGI Symbol;Acc:MGI:1916933]	protein_coding	125.559	-0.990794	3.74575e-12	unchanged	0.887754	8.11218e-11	unchanged	0.118599	0.775176	unchanged	0.695816	1.07978e-05	unchanged	0.230466	0.168112	unchanged	0.0517681	1	unchanged	-0.0572749	0.83958	unchanged	0.023539	0.940793	unchanged
ENSMUSG00000008153	chr6	124430580	124464794	-	Clstn3	calsyntenin 3 [Source:MGI Symbol;Acc:MGI:2178323]	protein_coding	2.96584	-0.294029	0.690175	unchanged	0.382622	0.638456	unchanged	0.559889	0.678755	unchanged	0.981405	0.141812	unchanged	2.89692	0.00220456	Up	-0.0301137	1	unchanged	-0.452541	0.731009	unchanged	1.63623	0.0533198	unchanged
ENSMUSG00000008167	chr8	85060054	85067124	+	Fbxw9	F-box and WD-40 domain protein 9 [Source:MGI Symbol;Acc:MGI:1915878]	protein_coding	39.8904	-0.267079	0.290513	unchanged	-0.263618	0.308195	unchanged	0.287551	0.571318	unchanged	0.0467647	0.911872	unchanged	0.844369	0.0005903	unchanged	-0.101327	1	unchanged	-0.0373749	0.945939	unchanged	0.689993	0.0126678	unchanged
ENSMUSG00000008193	chr7	44525992	44532071	-	Spib	Spi-B transcription factor (Spi-1/PU.1 related) [Source:MGI Symbol;Acc:MGI:892986]	protein_coding	0.441455	-2.92459	0.130061	unchanged	-1.46444	0.495997	unchanged	1.27737	NA	unchanged	0.419348	NA	unchanged	0.29784	NA	unchanged	-0.338736	1	unchanged	-0.621293	NA	unchanged	0.210733	NA	unchanged
ENSMUSG00000008200	chr2	90745369	90781021	+	Fnbp4	formin binding protein 4 [Source:MGI Symbol;Acc:MGI:1860513]	protein_coding	53.4	0.224042	0.260115	unchanged	0.355035	0.0432613	unchanged	0.0358937	0.962327	unchanged	-0.622544	0.00190164	unchanged	-0.929334	5.75e-06	unchanged	-0.0445642	1	unchanged	0.237555	0.353699	unchanged	-0.227573	0.381644	unchanged
ENSMUSG00000008206	chr8	4493025	4531680	+	Cers4	ceramide synthase 4 [Source:MGI Symbol;Acc:MGI:1914510]	protein_coding	3.68832	0.707632	0.437322	unchanged	0.71505	0.393437	unchanged	0.741759	0.720495	unchanged	-0.694858	0.546698	unchanged	-2.49703	0.00719464	Down	-0.994827	1	unchanged	-1.2903	0.287575	unchanged	-2.31188	0.00818399	Down
ENSMUSG00000008226	chr2	73312600	73337818	+	Scrn3	secernin 3 [Source:MGI Symbol;Acc:MGI:1921866]	protein_coding	11.9956	0.974587	0.000593358	unchanged	0.117344	0.739959	unchanged	-0.0258992	0.990535	unchanged	0.175191	0.657947	unchanged	1.06849	0.00161087	Up	-0.0495761	1	unchanged	0.270814	0.556524	unchanged	0.0764697	0.910206	unchanged
ENSMUSG00000008301	chr18	56562442	56587712	+	Phax	phosphorylated adaptor for RNA export [Source:MGI Symbol;Acc:MGI:1891839]	protein_coding	39.3218	0.0108823	0.966502	unchanged	-1.29329	3.83641e-17	Down	0.181945	0.630391	unchanged	-0.0555222	0.8543	unchanged	-0.450627	0.0601606	unchanged	-0.110134	1	unchanged	0.0937407	0.797476	unchanged	0.280481	0.266203	unchanged
ENSMUSG00000008305	chr4	72117141	72200919	-	Tle1	transducin-like enhancer of split 1 [Source:MGI Symbol;Acc:MGI:104636]	protein_coding	23.3588	1.12089	0.000175765	Up	-0.2888	0.378879	unchanged	0.0915809	0.944324	unchanged	-1.10015	0.00081715	Down	-1.32203	8.54e-05	Down	-0.230891	1	unchanged	-0.631295	0.135012	unchanged	-0.769469	0.0390083	unchanged
ENSMUSG00000008307	chr5	3571565	3584356	+	1700109H08Rik	RIKEN cDNA 1700109H08 gene [Source:MGI Symbol;Acc:MGI:1924286]	protein_coding	0.54319	-0.349005	0.820915	unchanged	1.26893	0.387001	unchanged	-1.70954	NA	unchanged	-0.199984	NA	unchanged	-0.423507	0.84242	unchanged	0.404353	1	unchanged	0.0929235	NA	unchanged	-0.825992	NA	unchanged
ENSMUSG00000008318	chr7	100845846	100863446	-	Relt	RELT tumor necrosis factor receptor [Source:MGI Symbol;Acc:MGI:2443373]	protein_coding	3.41287	-1.04164	0.0879378	unchanged	-0.0186661	0.983812	unchanged	0.315943	0.847781	unchanged	-0.776858	0.452699	unchanged	-1.16759	0.251612	unchanged	0.419695	1	unchanged	-0.224051	0.841865	unchanged	-0.426295	0.592149	unchanged
ENSMUSG00000008333	chr2	143063038	143072853	+	Snrpb2	U2 small nuclear ribonucleoprotein B [Source:MGI Symbol;Acc:MGI:104805]	protein_coding	205.497	-0.0547079	0.711356	unchanged	-0.822572	1.98294e-14	unchanged	-0.0442366	0.923128	unchanged	-0.00772875	0.983006	unchanged	-0.605141	3.34e-07	unchanged	0.0700865	1	unchanged	-0.0550388	0.815478	unchanged	-0.379332	0.00594881	unchanged
ENSMUSG00000008348	chr5	125385964	125390202	-	Ubc	ubiquitin C [Source:MGI Symbol;Acc:MGI:98889]	protein_coding	329.415	0.148212	0.611529	unchanged	-0.0952252	0.752923	unchanged	0.2403	0.69465	unchanged	0.234997	0.475255	unchanged	0.665253	0.00698861	unchanged	0.152106	1	unchanged	-0.0604044	0.904878	unchanged	0.390254	0.204472	unchanged
ENSMUSG00000008373	chr7	3629984	3642486	+	Prpf31	pre-mRNA processing factor 31 [Source:MGI Symbol;Acc:MGI:1916238]	protein_coding	24.9324	-0.443638	0.0248036	unchanged	-0.942517	1.16379e-06	unchanged	0.234815	0.576265	unchanged	0.0101204	0.98742	unchanged	0.0783939	0.855371	unchanged	-0.0121	1	unchanged	0.10271	0.815399	unchanged	-0.148693	0.705066	unchanged
ENSMUSG00000008384	chr7	27486909	27490316	+	Sertad1	SERTA domain containing 1 [Source:MGI Symbol;Acc:MGI:1913438]	protein_coding	68.9716	1.35324	1.40513e-07	Up	2.27248	2.08097e-20	Up	-0.660614	0.158439	unchanged	-1.30937	1.89129e-06	Down	-0.908919	0.00129203	unchanged	0.0969338	1	unchanged	0.291897	0.473295	unchanged	0.201889	0.621863	unchanged
ENSMUSG00000008393	chr16	8658579	8672155	-	Carhsp1	calcium regulated heat stable protein 1 [Source:MGI Symbol;Acc:MGI:1196368]	protein_coding	70.6062	0.469092	0.0246171	unchanged	1.10138	2.80399e-09	Up	0.326006	0.436135	unchanged	-0.33393	0.186418	unchanged	0.173519	0.513248	unchanged	0.196687	1	unchanged	0.371093	0.150132	unchanged	0.519049	0.0198559	unchanged
ENSMUSG00000008398	chr10	93247413	93311135	-	Elk3	ELK3, member of ETS oncogene family [Source:MGI Symbol;Acc:MGI:101762]	protein_coding	3.05609	3.43732	0.000206402	Up	3.38965	4.28562e-05	Up	0.353047	0.943145	unchanged	-2.92836	0.00379481	Down	-1.65935	0.114502	unchanged	-0.641169	1	unchanged	-1.49835	0.06483	unchanged	-0.461752	0.580662	unchanged
ENSMUSG00000008429	chr9	25108131	25151820	-	Herpud2	HERPUD family member 2 [Source:MGI Symbol;Acc:MGI:1915393]	protein_coding	25.2696	-0.197052	0.490762	unchanged	0.116857	0.671064	unchanged	-0.0234502	0.985143	unchanged	0.296436	0.354549	unchanged	0.144119	0.649409	unchanged	-0.299358	1	unchanged	0.340362	0.293151	unchanged	0.0925239	0.834082	unchanged
ENSMUSG00000008435	chr7	4424769	4445649	-	Rdh13	retinol dehydrogenase 13 (all-trans and 9-cis) [Source:MGI Symbol;Acc:MGI:1918732]	protein_coding	11.6523	0.10967	0.757459	unchanged	-0.496605	0.0627476	unchanged	-0.131214	0.897651	unchanged	-0.153891	0.728065	unchanged	-0.482374	0.184734	unchanged	-0.0308408	1	unchanged	-0.316023	0.50792	unchanged	-0.279155	0.547294	unchanged
ENSMUSG00000008450	chr8	105860579	105879330	+	Nutf2	nuclear transport factor 2 [Source:MGI Symbol;Acc:MGI:1915301]	protein_coding	0.836184	1.10003	0.331788	unchanged	-0.959122	0.432926	unchanged	0.00531923	NA	unchanged	0.036899	0.98742	unchanged	1.08792	0.419206	unchanged	-0.136867	1	unchanged	1.11026	NA	unchanged	1.01462	0.550866	unchanged
ENSMUSG00000008475	chr1	152766541	152775597	+	Arpc5	actin related protein 2/3 complex, subunit 5 [Source:MGI Symbol;Acc:MGI:1915021]	protein_coding	197.546	-0.0998357	0.732331	unchanged	-0.421648	0.0675859	unchanged	-0.141588	0.858286	unchanged	-0.415064	0.125947	unchanged	0.65902	0.00484932	unchanged	0.200625	1	unchanged	0.347573	0.291635	unchanged	-0.156526	0.674771	unchanged
ENSMUSG00000008489	chr4	91250762	91400785	-	Elavl2	ELAV like RNA binding protein 1 [Source:MGI Symbol;Acc:MGI:1100887]	protein_coding	3.39862	-1.42776	0.0230606	Down	-1.20491	0.0287379	Down	-0.567736	0.675282	unchanged	-0.482649	0.69595	unchanged	-2.46387	0.0234705	Down	-0.0331997	1	unchanged	0.295296	0.800069	unchanged	-2.61462	0.00114121	Down
ENSMUSG00000008496	chr7	25087343	25179726	-	Pou2f2	POU domain, class 2, transcription factor 2 [Source:MGI Symbol;Acc:MGI:101897]	protein_coding	2.95926	0.267391	0.758781	unchanged	2.88363	4.06624e-05	Up	-0.216431	0.941439	unchanged	-0.867956	0.383293	unchanged	-1.6506	0.134038	unchanged	0.695483	1	unchanged	0.396774	0.615813	unchanged	-0.172844	0.850471	unchanged
ENSMUSG00000008540	chr6	138140315	138156755	+	Mgst1	microsomal glutathione S-transferase 1 [Source:MGI Symbol;Acc:MGI:1913850]	protein_coding	0.270747	0	NA	unchanged	-0.145816	NA	unchanged	0	NA	unchanged	0	NA	unchanged	0	NA	unchanged	-0.316985	1	unchanged	0	NA	unchanged	-0.149936	NA	unchanged
ENSMUSG00000008575	chr4	82290172	82705750	-	Nfib	nuclear factor I/B [Source:MGI Symbol;Acc:MGI:103188]	protein_coding	2.15364	1.07627	0.363733	unchanged	-0.777222	0.492513	unchanged	-1.40124	0.633964	unchanged	-1.25921	0.39081	unchanged	-1.62609	0.186847	unchanged	-0.943274	1	unchanged	-1.92626	0.258244	unchanged	-2.58581	0.0347405	Down
ENSMUSG00000008601	chr3	88542028	88548300	-	Rab25	RAB25, member RAS oncogene family [Source:MGI Symbol;Acc:MGI:1858203]	protein_coding	1.87898	-2.79865	0.00958925	Down	-0.875414	0.552613	unchanged	-2.15918	0.25094	unchanged	0.419348	0.856833	unchanged	-2.32595	0.0622781	unchanged	0.369425	1	unchanged	1.16904	0.580124	unchanged	-1.31804	0.418873	unchanged
ENSMUSG00000008604	chr3	88553757	88569725	+	Ubqln4	ubiquilin 4 [Source:MGI Symbol;Acc:MGI:2150152]	protein_coding	26.9251	0.661162	0.0174093	unchanged	0.49724	0.0529735	unchanged	-0.324266	0.659194	unchanged	-1.50399	1.3941e-06	Down	-1.77916	6.88e-11	Down	-0.177657	1	unchanged	-0.92581	0.00277778	unchanged	-1.83575	2.69359e-12	Down
ENSMUSG00000008668	chr17	33951998	33956001	-	Rps18	ribosomal protein S18 [Source:MGI Symbol;Acc:MGI:98146]	protein_coding	2569.84	-0.325462	0.0011318	unchanged	0.396232	4.56089e-05	unchanged	0.232915	0.152258	unchanged	0.338183	0.00182322	unchanged	0.201962	0.0709022	unchanged	0.00350358	1	unchanged	0.250278	0.0518732	unchanged	0.239655	0.0483212	unchanged
ENSMUSG00000008682	chrX	74270811	74273135	+	Rpl10	ribosomal protein L10 [Source:MGI Symbol;Acc:MGI:105943]	protein_coding	727.849	-0.758863	0.00145549	unchanged	1.36399	1.76227e-09	Up	0.052641	0.95883	unchanged	0.0924238	0.829336	unchanged	0.657544	0.00960716	unchanged	0.12005	1	unchanged	0.26818	0.490403	unchanged	0.618061	0.0303504	unchanged
ENSMUSG00000008683	chr7	118104371	118116188	-	Rps15a	ribosomal protein S15A [Source:MGI Symbol;Acc:MGI:2389091]	protein_coding	1905.16	-0.342514	5.21254e-05	unchanged	0.316434	0.000179917	unchanged	0.169099	0.275261	unchanged	0.217096	0.0280294	unchanged	0.00839991	0.960958	unchanged	-0.0470833	1	unchanged	0.252279	0.0182579	unchanged	0.0542964	0.713981	unchanged
ENSMUSG00000008690	chr15	89355718	89372826	+	Ncaph2	non-SMC condensin II complex, subunit H2 [Source:MGI Symbol;Acc:MGI:1289164]	protein_coding	137.53	-0.751262	2.92548e-13	unchanged	0.978572	3.77288e-23	unchanged	0.0208998	0.961607	unchanged	0.274067	0.0351767	unchanged	0.152773	0.258389	unchanged	0.0338048	1	unchanged	-0.132574	0.406549	unchanged	0.336382	0.00513155	unchanged
ENSMUSG00000008730	chr3	103739814	103791563	-	Hipk1	homeodomain interacting protein kinase 1 [Source:MGI Symbol;Acc:MGI:1314873]	protein_coding	64.2442	-0.691157	1.10453e-07	unchanged	-0.136986	0.346246	unchanged	-0.0738543	0.873906	unchanged	-0.284366	0.115714	unchanged	-0.158553	0.430309	unchanged	-0.00173636	1	unchanged	0.0824452	0.742409	unchanged	0.331895	0.0595021	unchanged
ENSMUSG00000008734	chr7	118972046	118995211	-	Gprc5b	G protein-coupled receptor, family C, group 5, member B [Source:MGI Symbol;Acc:MGI:1927596]	protein_coding	2.87665	0.567055	0.664309	unchanged	2.25648	0.00137217	Up	0.687736	0.836814	unchanged	-1.09951	0.474218	unchanged	-3.57478	0.000265366	Down	1.01878	1	unchanged	-0.538496	0.585885	unchanged	-0.324921	0.702756	unchanged
ENSMUSG00000008763	chr3	100562207	100685503	-	Man1a2	mannosidase, alpha, class 1A, member 2 [Source:MGI Symbol;Acc:MGI:104676]	protein_coding	48.4391	-0.137323	0.489612	unchanged	-0.753282	2.00829e-06	unchanged	-0.00549043	1	unchanged	-0.288997	0.17794	unchanged	-0.0267161	0.932981	unchanged	-0.153863	1	unchanged	0.175636	0.54994	unchanged	-0.03161	0.938428	unchanged
ENSMUSG00000008822	chr12	85272397	85288438	-	Acyp1	acylphosphatase 1, erythrocyte (common) type [Source:MGI Symbol;Acc:MGI:1913454]	protein_coding	22.4497	-0.444243	0.0622118	unchanged	0.843435	2.15812e-05	unchanged	0.0345342	0.971252	unchanged	0.288232	0.357895	unchanged	-0.00651709	0.988986	unchanged	0.0236598	1	unchanged	0.117167	0.746065	unchanged	0.262566	0.365562	unchanged
ENSMUSG00000008843	chr5	134914248	134915526	-	Cldn13	claudin 13 [Source:MGI Symbol;Acc:MGI:1913102]	protein_coding	0.175759	0.44778	NA	unchanged	0	NA	unchanged	0	NA	unchanged	-0.301997	NA	unchanged	-0.423505	NA	unchanged	0	1	unchanged	0	NA	unchanged	0.571404	NA	unchanged
ENSMUSG00000008855	chr11	102194431	102230166	-	Hdac5	histone deacetylase 5 [Source:MGI Symbol;Acc:MGI:1333784]	protein_coding	12.4081	-2.88277	4.61018e-15	Down	0.0939613	0.868771	unchanged	-0.206596	0.828277	unchanged	0.599764	0.301277	unchanged	-0.641189	0.204033	unchanged	0.416413	1	unchanged	0.0078016	0.99523	unchanged	-0.516338	0.374078	unchanged
ENSMUSG00000008859	chr13	17880570	17944239	-	Rala	v-ral simian leukemia viral oncogene A (ras related) [Source:MGI Symbol;Acc:MGI:1927243]	protein_coding	68.9033	2.30218	5.17671e-34	Up	0.818921	3.83249e-07	unchanged	0.198541	0.765808	unchanged	-0.413394	0.0351602	unchanged	-0.0765749	0.764933	unchanged	-0.373328	1	unchanged	-0.0628049	0.848151	unchanged	0.0436995	0.899766	unchanged
ENSMUSG00000008892	chr8	22577074	22593813	-	Vdac3	voltage-dependent anion channel 3 [Source:MGI Symbol;Acc:MGI:106922]	protein_coding	90.6344	1.50251	1.41409e-23	Up	0.0319308	0.881208	unchanged	-0.000301267	1	unchanged	0.295817	0.0801489	unchanged	0.298354	0.0685042	unchanged	-0.0310884	1	unchanged	0.164526	0.498279	unchanged	0.250149	0.180716	unchanged
ENSMUSG00000008958	chr3	95111021	95123051	+	Vps72	vacuolar protein sorting 72 [Source:MGI Symbol;Acc:MGI:1202305]	protein_coding	75.1373	-1.06369	1.1469e-10	Down	0.235321	0.198069	unchanged	-0.0398821	0.954348	unchanged	0.332953	0.130004	unchanged	-0.238371	0.263065	unchanged	-0.0273589	1	unchanged	-0.0266769	0.9453	unchanged	0.383914	0.0650949	unchanged
ENSMUSG00000008976	chr16	84834924	84863779	+	Gabpa	GA repeat binding protein, alpha [Source:MGI Symbol;Acc:MGI:95610]	protein_coding	156.455	-0.105127	0.471289	unchanged	-0.0988036	0.487625	unchanged	-0.004677	1	unchanged	-0.269853	0.0656096	unchanged	-0.423304	0.0022652	unchanged	-0.0608138	1	unchanged	0.238787	0.156758	unchanged	-0.199665	0.255686	unchanged
ENSMUSG00000008999	chr2	172868011	172940321	-	Bmp7	bone morphogenetic protein 7 [Source:MGI Symbol;Acc:MGI:103302]	protein_coding	2.38414	-1.94467	0.0902436	unchanged	-0.144669	0.936368	unchanged	1.79831	0.176837	unchanged	0.780022	0.67397	unchanged	0.61484	0.707144	unchanged	1.04757	1	unchanged	0.456939	0.84557	unchanged	-1.50876	0.284202	unchanged
ENSMUSG00000009013	chr5	115297109	115300999	-	Dynll1	dynein light chain LC8-type 1 [Source:MGI Symbol;Acc:MGI:1861457]	protein_coding	725.106	0.287396	0.0576341	unchanged	0.829984	1.27924e-09	unchanged	0.174168	0.618514	unchanged	-0.461479	0.00339113	unchanged	-0.307291	0.0520679	unchanged	0.0415895	1	unchanged	0.0221082	0.947194	unchanged	-0.214534	0.26934	unchanged
ENSMUSG00000009030	chr2	37350073	37359332	-	Pdcl	phosducin-like [Source:MGI Symbol;Acc:MGI:1914716]	protein_coding	52.2568	-0.279004	0.172089	unchanged	0.35765	0.066653	unchanged	-0.0228605	0.97878	unchanged	0.23971	0.341641	unchanged	-0.379702	0.0691865	unchanged	0.0193923	1	unchanged	0.0362822	0.931922	unchanged	-0.100186	0.773877	unchanged
ENSMUSG00000009035	chr15	79360683	79403569	-	Tmem184b	transmembrane protein 184b [Source:MGI Symbol;Acc:MGI:2445179]	protein_coding	13.2634	0.251991	0.5953	unchanged	1.1129	3.05253e-05	Up	-0.691856	0.444108	unchanged	-0.134759	0.849471	unchanged	-0.808256	0.00662519	unchanged	-0.0451438	1	unchanged	-0.112594	0.823018	unchanged	-0.990843	0.000628426	unchanged
ENSMUSG00000009073	chr11	4765844	4849536	-	Nf2	neurofibromin 2 [Source:MGI Symbol;Acc:MGI:97307]	protein_coding	59.1179	-0.799822	9.88357e-07	unchanged	-0.179016	0.334274	unchanged	-0.269945	0.411255	unchanged	-0.623305	0.00230126	unchanged	-0.100991	0.725721	unchanged	-0.306764	1	unchanged	-0.0048419	0.991935	unchanged	0.0941303	0.756186	unchanged
ENSMUSG00000009075	chr11	4736891	4746778	-	Cabp7	calcium binding protein 7 [Source:MGI Symbol;Acc:MGI:2183437]	protein_coding	3.47652	-2.74183	9.2249e-06	Down	-1.77077	0.00364618	Down	-0.0220582	1	unchanged	-0.526624	0.694734	unchanged	-0.624913	0.693886	unchanged	-0.108783	1	unchanged	0.173765	0.908576	unchanged	-0.224201	0.874671	unchanged
ENSMUSG00000009076	chr11	4704677	4737669	+	Zmat5	zinc finger, matrin type 5 [Source:MGI Symbol;Acc:MGI:1914428]	protein_coding	83.4352	-0.0675491	0.699176	unchanged	-0.22799	0.103566	unchanged	-0.0412053	0.943145	unchanged	-1.17803	7.28452e-16	Down	-1.57092	7.29e-22	Down	-0.019575	1	unchanged	-0.347906	0.0531287	unchanged	-0.16963	0.401677	unchanged
ENSMUSG00000009079	chr11	5069688	5099266	-	Ewsr1	Ewing sarcoma breakpoint region 1 [Source:MGI Symbol;Acc:MGI:99960]	protein_coding	146.51	1.05117	1.07751e-19	Up	-0.250502	0.0537863	unchanged	0.0593972	0.905182	unchanged	-0.316543	0.0194308	unchanged	-0.345248	0.0216525	unchanged	0.0740894	1	unchanged	-0.129464	0.555641	unchanged	0.161208	0.387924	unchanged
ENSMUSG00000009090	chr11	4986823	5042791	+	Ap1b1	adaptor protein complex AP-1, beta 1 subunit [Source:MGI Symbol;Acc:MGI:1096368]	protein_coding	26.9896	-0.41839	0.0481613	unchanged	0.0677021	0.787071	unchanged	0.0609614	0.939344	unchanged	0.196712	0.519414	unchanged	0.689346	0.000951849	unchanged	-0.104269	1	unchanged	-0.0884118	0.820662	unchanged	-0.138478	0.657301	unchanged
ENSMUSG00000009092	chr10	75893412	75895941	+	Derl3	Der1-like domain family, member 3 [Source:MGI Symbol;Acc:MGI:1917627]	protein_coding	2.88842	-0.841382	0.300017	unchanged	-1.217	0.113971	unchanged	-0.239911	0.929893	unchanged	-0.543767	0.677115	unchanged	0.928202	0.276421	unchanged	0.661109	1	unchanged	0.0905738	0.962909	unchanged	-1.50488	0.138772	unchanged
ENSMUSG00000009097	chr16	18580978	18590671	-	Tbx1	T-box 1 [Source:MGI Symbol;Acc:MGI:98493]	protein_coding	0.449599	-2.14101	0.152997	unchanged	-2.54109	0.0637968	unchanged	0.0118342	NA	unchanged	0	NA	unchanged	-0.423507	NA	unchanged	-0.32856	1	unchanged	-0.26062	NA	unchanged	-0.14994	NA	unchanged
ENSMUSG00000009108	chr3	108092788	108101432	+	Gnat2	guanine nucleotide binding protein, alpha transducing 2 [Source:MGI Symbol;Acc:MGI:95779]	protein_coding	0.316908	-0.273564	NA	unchanged	0.575525	0.884596	unchanged	0.00522892	NA	unchanged	0	NA	unchanged	0.29784	NA	unchanged	0.404352	1	unchanged	-0.260619	NA	unchanged	-0.14994	NA	unchanged
ENSMUSG00000009112	chr6	120836211	120892842	+	Bcl2l13	BCL2-like 13 (apoptosis facilitator) [Source:MGI Symbol;Acc:MGI:2136959]	protein_coding	64.2517	-0.54599	0.000199267	unchanged	-0.352984	0.0154135	unchanged	0.130161	0.744828	unchanged	0.476446	0.00388666	unchanged	0.515407	0.00175377	unchanged	-0.0752474	1	unchanged	0.195972	0.396117	unchanged	0.331863	0.092571	unchanged
ENSMUSG00000009145	chr6	83057843	83067318	+	Dqx1	DEAQ RNA-dependent ATPase [Source:MGI Symbol;Acc:MGI:2136388]	protein_coding	1.93034	-0.0822136	0.961604	unchanged	0.562431	0.648972	unchanged	0.485243	0.89482	unchanged	-0.494099	0.786333	unchanged	-0.932061	0.447745	unchanged	-0.090097	1	unchanged	-0.0777999	0.973552	unchanged	-0.983399	0.55711	unchanged
ENSMUSG00000009207	chr2	74520290	74579435	-	Lnpk	lunapark, ER junction formation factor [Source:MGI Symbol;Acc:MGI:1918115]	protein_coding	29.3897	-0.414682	0.0660915	unchanged	0.562408	0.00584985	unchanged	-0.0301598	0.974942	unchanged	0.736713	0.00117412	unchanged	0.383924	0.10496	unchanged	0.161276	1	unchanged	-0.336294	0.264317	unchanged	-0.254118	0.416413	unchanged
ENSMUSG00000009216	chr2	27110379	27142491	-	Fam163b	family with sequence similarity 163, member B [Source:MGI Symbol;Acc:MGI:1926106]	protein_coding	0.068176	0	NA	unchanged	0	NA	unchanged	0	NA	unchanged	0	NA	unchanged	0	NA	unchanged	0	1	unchanged	0	NA	unchanged	0	NA	unchanged
ENSMUSG00000009248	chr7	142966828	142969264	-	Ascl2	achaete-scute family bHLH transcription factor 2 [Source:MGI Symbol;Acc:MGI:96920]	protein_coding	1.58154	-0.634238	0.725627	unchanged	-1.24551	0.430393	unchanged	2.06242	0.398439	unchanged	0	1	unchanged	-0.0628333	0.983152	unchanged	1.74531	1	unchanged	2.39274	0.178784	unchanged	-0.400499	0.875896	unchanged
ENSMUSG00000009291	chr10	77581719	77598732	+	Pttg1ip	pituitary tumor-transforming 1 interacting protein [Source:MGI Symbol;Acc:MGI:2652132]	protein_coding	259.112	-1.26046	1.54167e-16	Down	-1.20851	2.01797e-15	Down	0.386038	0.128716	unchanged	0.379943	0.0460208	unchanged	0.462472	0.00955816	unchanged	-0.0745744	1	unchanged	-0.0462791	0.895124	unchanged	0.0307057	0.935582	unchanged
ENSMUSG00000009293	chr10	77622274	77645993	+	Ube2g2	ubiquitin-conjugating enzyme E2G 2 [Source:MGI Symbol;Acc:MGI:1343188]	protein_coding	22.712	-0.339121	0.123174	unchanged	-0.413978	0.0399311	unchanged	-0.00194176	1	unchanged	-0.0234551	0.965395	unchanged	0.344967	0.220889	unchanged	-0.0759625	1	unchanged	0.398841	0.153344	unchanged	-0.0272832	0.949658	unchanged
ENSMUSG00000009376	chr6	17463799	17573980	+	Met	met proto-oncogene [Source:MGI Symbol;Acc:MGI:96969]	protein_coding	0.354396	0	NA	unchanged	-1.79645	0.644845	unchanged	0.365901	NA	unchanged	0	NA	unchanged	0	NA	unchanged	-1.96763	1	unchanged	0	NA	unchanged	0	NA	unchanged
ENSMUSG00000009406	chrX	20933394	20950608	-	Elk1	ELK1, member of ETS oncogene family [Source:MGI Symbol;Acc:MGI:101833]	protein_coding	14.0495	-1.07921	0.000105613	Down	-0.0502047	0.909222	unchanged	-0.8834	0.02104	unchanged	0.0331178	0.96668	unchanged	-0.610423	0.0806424	unchanged	0.0351648	1	unchanged	-0.171359	0.772202	unchanged	-0.424241	0.263336	unchanged
ENSMUSG00000009418	chr1	135434579	135688105	-	Nav1	neuron navigator 1 [Source:MGI Symbol;Acc:MGI:2183683]	protein_coding	19.6104	-0.330225	0.283671	unchanged	-0.264959	0.388675	unchanged	0.50674	0.269575	unchanged	0.807316	0.00601114	unchanged	-0.914492	0.00622119	unchanged	-0.190726	1	unchanged	0.11744	0.831121	unchanged	-0.946923	0.00679102	unchanged
ENSMUSG00000009470	chr13	98839018	98926384	-	Tnpo1	transportin 1 [Source:MGI Symbol;Acc:MGI:2681523]	protein_coding	155.11	-0.655676	5.80518e-06	unchanged	-0.462632	0.00126078	unchanged	0.0893459	0.867319	unchanged	-0.0836494	0.74143	unchanged	-0.672166	3.6e-05	unchanged	-0.119966	1	unchanged	-0.317442	0.114982	unchanged	-0.356273	0.050883	unchanged
ENSMUSG00000009471	chr7	46376473	46379099	+	Myod1	myogenic differentiation 1 [Source:MGI Symbol;Acc:MGI:97275]	protein_coding	2.53754	2.11733	0.0431864	Up	1.69498	0.0829893	unchanged	-1.5253	0.613298	unchanged	-3.1414	0.0132587	Down	-2.10224	0.154083	unchanged	0.388895	1	unchanged	-3.20432	0.0229832	Down	-2.329	0.110442	unchanged
ENSMUSG00000009487	chr7	46240986	46311434	+	Otog	otogelin [Source:MGI Symbol;Acc:MGI:1202064]	protein_coding	0.834187	-1.28724	0.331324	unchanged	-2.25809	0.0374334	Down	0.688457	NA	unchanged	0.415122	0.862846	unchanged	1.01919	0.559665	unchanged	-1.12161	1	unchanged	-0.624045	NA	unchanged	-0.879578	0.685009	unchanged
ENSMUSG00000009535	chr18	68300354	68324852	+	Rnmt	RNA (guanine-7-) methyltransferase [Source:MGI Symbol;Acc:MGI:1915147]	protein_coding	64.9801	-0.712478	1.2879e-07	unchanged	-1.58725	4.79926e-34	Down	-0.0479353	0.929272	unchanged	-0.142695	0.515171	unchanged	-0.256291	0.216396	unchanged	0.064569	1	unchanged	-0.342551	0.126324	unchanged	-0.615219	0.00226844	unchanged
ENSMUSG00000009549	chr2	118475849	118479711	-	Srp14	signal recognition particle 14 [Source:MGI Symbol;Acc:MGI:107169]	protein_coding	213.404	-0.213804	0.152753	unchanged	0.296112	0.0357046	unchanged	-0.154964	0.651657	unchanged	0.2036	0.251232	unchanged	0.0964981	0.622344	unchanged	0.0511037	1	unchanged	0.292372	0.110438	unchanged	0.0820267	0.730133	unchanged
ENSMUSG00000009555	chr2	32705783	32713076	-	Cdk9	cyclin-dependent kinase 9 (CDC2-related kinase) [Source:MGI Symbol;Acc:MGI:1328368]	protein_coding	87.8318	1.05786	1.60624e-17	Up	0.549615	5.08341e-06	unchanged	-0.241534	0.416727	unchanged	-0.0950497	0.606583	unchanged	-0.64476	2.71e-06	unchanged	0.191404	1	unchanged	-0.0626744	0.794884	unchanged	-0.215489	0.173656	unchanged
ENSMUSG00000009563	chr2	32757233	32762244	+	Tor2a	torsin family 2, member A [Source:MGI Symbol;Acc:MGI:1353596]	protein_coding	56.4525	-2.8981	3.52073e-45	Down	-1.82024	1.51232e-21	Down	0.0124795	0.996625	unchanged	0.318824	0.330199	unchanged	-0.217759	0.495663	unchanged	-0.114633	1	unchanged	-0.145773	0.731009	unchanged	-0.0151912	0.975309	unchanged
ENSMUSG00000009566	chr2	32682608	32704145	-	Fpgs	folylpolyglutamyl synthetase [Source:MGI Symbol;Acc:MGI:95576]	protein_coding	62.4219	-0.446015	0.0210648	unchanged	0.668345	0.00026877	unchanged	-0.0484015	0.949501	unchanged	-0.56461	0.0118905	unchanged	-1.49209	1.71e-12	Down	0.0180596	1	unchanged	-0.449655	0.0680053	unchanged	-0.100062	0.76788	unchanged
ENSMUSG00000009569	chr16	13256480	13417529	+	Mrtfb	myocardin related transcription factor B [Source:MGI Symbol;Acc:MGI:3050795]	protein_coding	4.27384	-0.195758	0.777494	unchanged	-0.703038	0.116245	unchanged	-0.345123	0.84329	unchanged	-0.929372	0.23964	unchanged	-0.558132	0.445805	unchanged	-0.702389	1	unchanged	0.414253	0.590137	unchanged	-0.0646712	0.948993	unchanged
ENSMUSG00000009575	chr15	103191543	103239816	-	Cbx5	chromobox 5 [Source:MGI Symbol;Acc:MGI:109372]	protein_coding	88.6214	-0.017758	0.944548	unchanged	-0.261249	0.0948752	unchanged	0.0102438	0.996644	unchanged	-0.278684	0.155001	unchanged	-0.346154	0.0548	unchanged	-0.137547	1	unchanged	0.0306746	0.928939	unchanged	-0.167733	0.468309	unchanged
ENSMUSG00000009585	chr15	79891658	79915906	+	Apobec3	apolipoprotein B mRNA editing enzyme, catalytic polypeptide 3 [Source:MGI Symbol;Acc:MGI:1933111]	protein_coding	17.1865	-2.07858	3.52755e-05	Down	-0.627653	0.238049	unchanged	-0.464669	0.709285	unchanged	-2.60507	0.00365788	Down	-3.73998	2.47e-06	Down	0.267093	1	unchanged	-1.81931	0.00991681	Down	-3.47868	1.73915e-09	Down
ENSMUSG00000009596	chrX	134460117	134476490	-	Taf7l	TATA-box binding protein associated factor 7 like [Source:MGI Symbol;Acc:MGI:1921719]	protein_coding	0.478389	0.447779	0.947823	unchanged	0	1	unchanged	0	NA	unchanged	-0.301997	NA	unchanged	0	NA	unchanged	0	1	unchanged	1.18207	NA	unchanged	0	NA	unchanged
ENSMUSG00000009614	chr2	27188392	27248337	-	Sardh	sarcosine dehydrogenase [Source:MGI Symbol;Acc:MGI:2183102]	protein_coding	0.218595	-1.29157	NA	unchanged	-0.506493	NA	unchanged	1.28017	NA	unchanged	0.419348	NA	unchanged	0	NA	unchanged	1.07879	1	unchanged	0	NA	unchanged	0	NA	unchanged
ENSMUSG00000009621	chr2	27262103	27427033	-	Vav2	vav 2 oncogene [Source:MGI Symbol;Acc:MGI:102718]	protein_coding	16.3369	-0.915103	0.00262826	unchanged	-1.36821	2.40741e-07	Down	0.1117	0.918976	unchanged	0.735317	0.0398704	unchanged	0.624565	0.0849115	unchanged	-0.344193	1	unchanged	0.518489	0.224636	unchanged	0.804487	0.0133408	unchanged
ENSMUSG00000009628	chr8	33516737	33585582	+	Tex15	testis expressed gene 15 [Source:MGI Symbol;Acc:MGI:1934816]	protein_coding	3.59922	-1.59896	0.135342	unchanged	0.214853	0.903549	unchanged	-0.733306	0.774836	unchanged	0.741598	0.672485	unchanged	-0.779828	0.631421	unchanged	0.0436796	1	unchanged	1.40239	0.404355	unchanged	-0.14994	0.955942	unchanged
ENSMUSG00000009630	chr8	33599624	33619441	+	Ppp2cb	protein phosphatase 2 (formerly 2A), catalytic subunit, beta isoform [Source:MGI Symbol;Acc:MGI:1321161]	protein_coding	47.5271	-0.398649	0.0195974	unchanged	-0.753573	1.87195e-06	unchanged	0.00386398	1	unchanged	-0.0203148	0.960298	unchanged	0.59709	0.00314954	unchanged	0.103668	1	unchanged	0.221619	0.41738	unchanged	0.163466	0.566988	unchanged
ENSMUSG00000009633	chr1	193272160	193273217	-	G0s2	G0/G1 switch gene 2 [Source:MGI Symbol;Acc:MGI:1316737]	protein_coding	0.417455	0	1	unchanged	1.29687	0.680196	unchanged	0	NA	unchanged	0	NA	unchanged	-0.784179	NA	unchanged	0	1	unchanged	-0.981965	NA	unchanged	-1.01708	NA	unchanged
ENSMUSG00000009640	chr4	117674680	117682273	-	Dmap1	DNA methyltransferase 1-associated protein 1 [Source:MGI Symbol;Acc:MGI:1913483]	protein_coding	36.9228	0.12386	0.527356	unchanged	-0.115633	0.555359	unchanged	0.17626	0.662475	unchanged	0.142213	0.54527	unchanged	-0.0528131	0.868901	unchanged	-0.376452	1	unchanged	-0.142243	0.645665	unchanged	0.251983	0.289822	unchanged
ENSMUSG00000009647	chr10	59446983	59616692	-	Mcu	mitochondrial calcium uniporter [Source:MGI Symbol;Acc:MGI:3026965]	protein_coding	3.19822	3.61502	3.99601e-05	Up	2.60759	7.41352e-05	Up	-0.716118	0.868237	unchanged	-1.29712	0.083617	unchanged	-0.817036	0.187216	unchanged	-0.626474	1	unchanged	-0.169409	0.853714	unchanged	0.404716	0.574251	unchanged
ENSMUSG00000009670	chrX	100838647	101059667	-	Tex11	testis expressed gene 11 [Source:MGI Symbol;Acc:MGI:1933237]	protein_coding	0.458549	1.15968	0.537373	unchanged	-1.39377	0.429359	unchanged	-0.355444	NA	unchanged	1.23446	NA	unchanged	-0.0628333	NA	unchanged	-0.8436	1	unchanged	0.100054	NA	unchanged	0	NA	unchanged
ENSMUSG00000009681	chr10	75060591	75184921	+	Bcr	breakpoint cluster region [Source:MGI Symbol;Acc:MGI:88141]	protein_coding	15.5108	0.658001	0.0511868	unchanged	0.582092	0.043294	unchanged	-0.0586924	0.969711	unchanged	-0.372331	0.386872	unchanged	0.172474	0.666322	unchanged	0.154136	1	unchanged	-0.380983	0.385266	unchanged	-0.396638	0.275797	unchanged
ENSMUSG00000009687	chr7	31032721	31042481	-	Fxyd5	FXYD domain-containing ion transport regulator 5 [Source:MGI Symbol;Acc:MGI:1201785]	protein_coding	1.41973	0.808456	0.601995	unchanged	3.11602	0.00248564	Up	0.00522893	NA	unchanged	0.748905	0.693657	unchanged	1.71962	0.0471832	Up	0.0436796	1	unchanged	-0.130176	0.943784	unchanged	-2.40285	0.0565378	unchanged
ENSMUSG00000009731	chrX	7822288	7838280	+	Kcnd1	potassium voltage-gated channel, Shal-related family, member 1 [Source:MGI Symbol;Acc:MGI:96671]	protein_coding	1.41852	-1.44092	0.238653	unchanged	1.74889	0.135963	unchanged	-1.5228	NA	unchanged	0.419348	0.8543	unchanged	-1.71161	0.159488	unchanged	1.08505	1	unchanged	0.727557	0.648593	unchanged	-1.86382	0.136986	unchanged
ENSMUSG00000009733	chr15	100498011	100552008	-	Tfcp2	transcription factor CP2 [Source:MGI Symbol;Acc:MGI:98509]	protein_coding	3.04579	-1.08495	0.0905139	unchanged	-0.0163693	0.9897	unchanged	-0.425349	0.80783	unchanged	0.70957	0.408084	unchanged	-0.177634	0.868353	unchanged	0.108727	1	unchanged	0.260924	0.83269	unchanged	0.416266	0.697415	unchanged
ENSMUSG00000009739	chr15	100575317	100599984	-	Pou6f1	POU domain, class 6, transcription factor 1 [Source:MGI Symbol;Acc:MGI:102935]	protein_coding	10.7709	-0.10495	0.845042	unchanged	1.52046	0.000247369	Up	-0.267661	0.835818	unchanged	-0.327003	0.583409	unchanged	-0.398046	0.503731	unchanged	0.430755	1	unchanged	-0.742061	0.198499	unchanged	-0.250543	0.707867	unchanged
ENSMUSG00000009741	chr9	113930933	113977202	+	Ubp1	upstream binding protein 1 [Source:MGI Symbol;Acc:MGI:104889]	protein_coding	68.3969	0.752284	1.08079e-08	unchanged	0.280443	0.0395722	unchanged	0.141101	0.715643	unchanged	-0.150635	0.404834	unchanged	0.107777	0.590129	unchanged	-0.120445	1	unchanged	-0.102992	0.672329	unchanged	-0.122137	0.557024	unchanged
ENSMUSG00000009772	chr1	132316125	132333488	+	Nuak2	NUAK family, SNF1-like kinase, 2 [Source:MGI Symbol;Acc:MGI:1921387]	protein_coding	0.543898	0.447781	0.909612	unchanged	-0.14582	0.972428	unchanged	0	NA	unchanged	-0.301998	NA	unchanged	1.01919	0.806284	unchanged	-0.316993	1	unchanged	0.460726	NA	unchanged	0.210733	NA	unchanged
ENSMUSG00000009828	chr9	78109191	78172107	+	Ick	intestinal cell kinase [Source:MGI Symbol;Acc:MGI:1934157]	protein_coding	9.05429	0.371004	0.296967	unchanged	0.237212	0.557783	unchanged	0.140829	0.911123	unchanged	0.479485	0.185377	unchanged	0.339557	0.447841	unchanged	-0.0716843	1	unchanged	0.151907	0.81905	unchanged	-0.0608029	0.940244	unchanged
ENSMUSG00000009863	chr4	140961202	140979193	+	Sdhb	succinate dehydrogenase complex, subunit B, iron sulfur (Ip) [Source:MGI Symbol;Acc:MGI:1914930]	protein_coding	99.0341	0.830536	2.33266e-09	unchanged	1.5371	1.15425e-35	Up	-0.17895	0.649541	unchanged	-0.643321	1.82229e-05	unchanged	-0.519127	0.000119285	unchanged	-0.0306942	1	unchanged	-0.124998	0.545879	unchanged	-0.110997	0.572725	unchanged
ENSMUSG00000009876	chr2	152754172	152765037	+	Cox4i2	cytochrome c oxidase subunit 4I2 [Source:MGI Symbol;Acc:MGI:2135755]	protein_coding	0.657619	-3.22242	0.0058778	Down	-1.83825	0.188574	unchanged	0.0681899	NA	unchanged	0.419348	0.870451	unchanged	-0.0628333	0.983152	unchanged	0.0740801	1	unchanged	0.460727	NA	unchanged	-0.14994	NA	unchanged
ENSMUSG00000009894	chr11	59407133	59451186	-	Snap47	synaptosomal-associated protein, 47 [Source:MGI Symbol;Acc:MGI:1915076]	protein_coding	23.2927	0.724534	0.0031117	unchanged	0.904003	2.03772e-05	unchanged	-0.27489	0.702294	unchanged	-0.273751	0.392552	unchanged	-0.24014	0.418729	unchanged	-0.218401	1	unchanged	-0.106069	0.794458	unchanged	0.118722	0.749042	unchanged
ENSMUSG00000009900	chr11	59248032	59290752	-	Wnt3a	wingless-type MMTV integration site family, member 3A [Source:MGI Symbol;Acc:MGI:98956]	protein_coding	3.15006	-1.64433	0.0107214	Down	-3.58541	3.95493e-05	Down	0.242319	0.897883	unchanged	1.008	0.235665	unchanged	2.41625	6.43e-05	Up	-0.0900508	1	unchanged	2.6892	0.0199603	Up	0.803054	0.581584	unchanged
ENSMUSG00000009905	chr1	106720458	106759727	-	Kdsr	3-ketodihydrosphingosine reductase [Source:MGI Symbol;Acc:MGI:1918000]	protein_coding	24.2347	-0.656166	0.00809351	unchanged	-0.738735	0.00319043	unchanged	0.287375	0.593781	unchanged	1.07167	1.68327e-05	Up	1.85407	4.99e-13	Up	0.139073	1	unchanged	0.00843687	0.990855	unchanged	-0.45102	0.246101	unchanged
ENSMUSG00000009907	chr1	106764070	106796728	-	Vps4b	vacuolar protein sorting 4B [Source:MGI Symbol;Acc:MGI:1100499]	protein_coding	66.8764	-0.111502	0.485992	unchanged	-0.16454	0.239919	unchanged	-0.110355	0.776623	unchanged	0.215661	0.199169	unchanged	-0.0624715	0.776381	unchanged	-0.144002	1	unchanged	-0.303923	0.0925225	unchanged	-0.513969	0.00255543	unchanged
ENSMUSG00000009927	chr9	44407138	44410427	+	Rps25	ribosomal protein S25 [Source:MGI Symbol;Acc:MGI:1922867]	protein_coding	1360.12	-0.189806	0.0419707	unchanged	0.116268	0.235448	unchanged	0.129412	0.509805	unchanged	0.228767	0.0244838	unchanged	0.16214	0.114656	unchanged	-0.0305234	1	unchanged	0.125097	0.359495	unchanged	0.126567	0.304368	unchanged
ENSMUSG00000009995	chrX	74281911	74290151	+	Taz	tafazzin [Source:MGI Symbol;Acc:MGI:109626]	protein_coding	12.2495	-0.677569	0.0842601	unchanged	-0.342249	0.391662	unchanged	0.174961	0.89108	unchanged	0.428304	0.41189	unchanged	0.469679	0.288658	unchanged	-0.406304	1	unchanged	-0.0573027	0.945488	unchanged	0.263986	0.662433	unchanged
ENSMUSG00000010025	chr11	61223416	61267464	-	Aldh3a2	aldehyde dehydrogenase family 3, subfamily A2 [Source:MGI Symbol;Acc:MGI:1353452]	protein_coding	15.8388	1.12913	5.05073e-05	Up	1.27909	2.9886e-07	Up	-0.422687	0.595667	unchanged	-0.421607	0.203635	unchanged	0.975082	0.000444282	unchanged	0.319239	1	unchanged	-0.014539	0.978254	unchanged	-0.30916	0.364901	unchanged
ENSMUSG00000010045	chr9	107533944	107538673	+	Tmem115	transmembrane protein 115 [Source:MGI Symbol;Acc:MGI:1930765]	protein_coding	21.9371	-0.805879	0.000459518	unchanged	0.205234	0.452474	unchanged	-0.193661	0.759252	unchanged	0.225912	0.528153	unchanged	0.087228	0.822629	unchanged	0.07005	1	unchanged	0.0322068	0.954282	unchanged	0.466682	0.123735	unchanged
ENSMUSG00000010047	chr9	107567944	107572779	+	Hyal2	hyaluronoglucosaminidase 2 [Source:MGI Symbol;Acc:MGI:1196334]	protein_coding	22.8882	-1.0901	0.000168061	Down	-0.186754	0.591032	unchanged	-0.409815	0.497867	unchanged	-0.159664	0.766364	unchanged	0.0400857	0.941466	unchanged	0.319058	1	unchanged	0.322228	0.496041	unchanged	-0.143347	0.791475	unchanged
ENSMUSG00000010048	chr9	107587641	107593385	+	Ifrd2	interferon-related developmental regulator 2 [Source:MGI Symbol;Acc:MGI:1316708]	protein_coding	18.5941	-0.349495	0.187306	unchanged	0.57644	0.0121498	unchanged	-0.388398	0.433148	unchanged	0.0581565	0.902623	unchanged	0.334963	0.322707	unchanged	-0.137632	1	unchanged	-0.515982	0.0975353	unchanged	-0.0180485	0.974381	unchanged
ENSMUSG00000010051	chr9	107576926	107581710	+	Hyal1	hyaluronoglucosaminidase 1 [Source:MGI Symbol;Acc:MGI:96298]	protein_coding	4.87899	1.18742	0.0370514	Up	-0.814169	0.284965	unchanged	1.09196	0.266555	unchanged	0.217686	0.79905	unchanged	1.08175	0.14953	unchanged	0.42408	1	unchanged	-0.134534	0.941042	unchanged	0.179211	0.90246	unchanged
ENSMUSG00000010054	chr9	107563254	107566112	+	Tusc2	tumor suppressor 2, mitochondrial calcium regulator [Source:MGI Symbol;Acc:MGI:1931086]	protein_coding	27.7292	-0.871604	6.34135e-05	unchanged	0.0578262	0.848745	unchanged	0.292204	0.51022	unchanged	0.651962	0.00993463	unchanged	0.845639	0.000268973	unchanged	-0.0615239	1	unchanged	0.217843	0.557906	unchanged	0.651404	0.0175006	unchanged
ENSMUSG00000010057	chr9	107542225	107545706	+	Nprl2	NPR2 like, GATOR1 complex subunit [Source:MGI Symbol;Acc:MGI:1914482]	protein_coding	6.20325	0.169298	0.72499	unchanged	0.0227401	0.967885	unchanged	-0.377113	0.722538	unchanged	-0.241541	0.68877	unchanged	-0.66983	0.153575	unchanged	0.266664	1	unchanged	-0.0986776	0.905187	unchanged	0.363129	0.476047	unchanged
ENSMUSG00000010064	chr9	107650633	107669530	-	Slc38a3	solute carrier family 38, member 3 [Source:MGI Symbol;Acc:MGI:1923507]	protein_coding	0.629575	0	1	unchanged	0.575524	0.910718	unchanged	0	NA	unchanged	0	1	unchanged	-1.14485	0.832169	unchanged	0.404352	1	unchanged	-0.260619	NA	unchanged	-1.19196	NA	unchanged
ENSMUSG00000010067	chr9	107551554	107562267	+	Rassf1	Ras association (RalGDS/AF-6) domain family member 1 [Source:MGI Symbol;Acc:MGI:1928386]	protein_coding	13.7458	1.2372	0.00297808	Up	0.776245	0.0224988	unchanged	0.0431565	0.986958	unchanged	-0.221635	0.713607	unchanged	1.0126	0.00207607	Up	-0.111272	1	unchanged	0.53727	0.232112	unchanged	0.223676	0.653419	unchanged
ENSMUSG00000010080	chr11	94489598	94499974	-	Epn3	epsin 3 [Source:MGI Symbol;Acc:MGI:1919139]	protein_coding	7.92272	-1.70203	0.104214	unchanged	-0.414558	0.77284	unchanged	-0.286433	0.936074	unchanged	2.15543	0.0572705	unchanged	3.6123	7.96e-06	Up	0.366589	1	unchanged	3.09159	0.0117351	Up	-0.194333	0.914027	unchanged
ENSMUSG00000010095	chr19	8706881	8723369	-	Slc3a2	solute carrier family 3 (activators of dibasic and neutral amino acid transport), member 2 [Source:MGI Symbol;Acc:MGI:96955]	protein_coding	212	-0.42487	0.0322502	unchanged	0.232982	0.272869	unchanged	-0.0257714	0.976498	unchanged	-0.142486	0.631255	unchanged	-0.559439	0.0057257	unchanged	0.0166451	1	unchanged	-0.00324956	0.996331	unchanged	-0.503826	0.0257182	unchanged
ENSMUSG00000010097	chr19	8757072	8770922	+	Nxf1	nuclear RNA export factor 1 [Source:MGI Symbol;Acc:MGI:1858330]	protein_coding	86.5106	0.322674	0.0146854	unchanged	-0.58555	2.69999e-06	unchanged	-0.0412081	0.943145	unchanged	-0.136297	0.449835	unchanged	-0.288352	0.0865578	unchanged	0.00416947	1	unchanged	0.051082	0.85275	unchanged	-0.173568	0.386935	unchanged
ENSMUSG00000010110	chr19	8741412	8756069	+	Stx5a	syntaxin 5A [Source:MGI Symbol;Acc:MGI:1928483]	protein_coding	37.8321	0.190438	0.391001	unchanged	1.25251	1.15155e-11	Up	-0.0394091	0.961607	unchanged	1.00409	1.9598e-08	Up	0.852833	1.48e-05	unchanged	0.28865	1	unchanged	0.00848672	0.984577	unchanged	0.18157	0.519813	unchanged
ENSMUSG00000010142	chr11	61126754	61149372	+	Tnfrsf13b	tumor necrosis factor receptor superfamily, member 13b [Source:MGI Symbol;Acc:MGI:1889411]	protein_coding	0.950145	-1.2304	0.33585	unchanged	1.23061	0.188249	unchanged	0.474932	NA	unchanged	-0.662459	0.755358	unchanged	-1.05375	0.503325	unchanged	-0.959697	1	unchanged	-1.06148	NA	unchanged	-1.51732	0.212378	unchanged
ENSMUSG00000010154	chr8	123332712	123369515	+	Spire2	spire type actin nucleation factor 2 [Source:MGI Symbol;Acc:MGI:2446256]	protein_coding	1.00294	-2.92733	0.00338892	Down	-2.94227	0.00382691	Down	-0.177123	NA	unchanged	1.0187	0.545743	unchanged	-0.78418	0.657022	unchanged	-0.239068	1	unchanged	0.100054	NA	unchanged	-0.516409	0.819728	unchanged
ENSMUSG00000010277	chr11	78261751	78290623	+	2610507B11Rik	RIKEN cDNA 2610507B11 gene [Source:MGI Symbol;Acc:MGI:1919753]	protein_coding	30.6415	1.40404	1.30023e-15	Up	-0.519811	0.00180658	unchanged	-0.402414	0.335944	unchanged	-0.687686	0.000144913	unchanged	-0.20773	0.495472	unchanged	-0.161679	1	unchanged	0.0101286	0.980123	unchanged	-0.03602	0.930107	unchanged
ENSMUSG00000010290	chr1	43098709	43115947	+	AI597479	expressed sequence AI597479 [Source:MGI Symbol;Acc:MGI:2138299]	protein_coding	22.459	-1.13636	9.571e-09	Down	-0.911852	3.3235e-07	unchanged	-0.0807546	0.906997	unchanged	-0.134082	0.73602	unchanged	-0.242836	0.413239	unchanged	-0.198962	1	unchanged	-0.243342	0.496327	unchanged	-0.0214046	0.961696	unchanged
ENSMUSG00000010307	chr7	47050600	47054777	+	Tmem86a	transmembrane protein 86A [Source:MGI Symbol;Acc:MGI:1915143]	protein_coding	19.7717	0.741492	0.0833016	unchanged	0.159269	0.784057	unchanged	0.268408	0.851629	unchanged	2.08645	2.37917e-08	Up	4.21512	1.25e-24	Up	0.256084	1	unchanged	1.97904	8.50776e-06	Up	2.62181	1.44353e-08	Up
ENSMUSG00000010342	chr11	87405064	87555823	+	Tex14	testis expressed gene 14 [Source:MGI Symbol;Acc:MGI:1933227]	protein_coding	2.91094	0.829535	0.237134	unchanged	0.647147	0.369197	unchanged	-0.720615	0.744051	unchanged	-1.81484	0.0492283	Down	-3.14851	0.00125151	Down	-0.189387	1	unchanged	-1.15321	0.291028	unchanged	1.93644	0.0309424	Up
ENSMUSG00000010358	chr11	101448406	101458698	+	Ifi35	interferon-induced protein 35 [Source:MGI Symbol;Acc:MGI:1917360]	protein_coding	10.2322	-0.749168	0.108737	unchanged	-0.206834	0.720796	unchanged	-0.330482	0.800598	unchanged	-0.465892	0.495046	unchanged	-0.623314	0.28905	unchanged	0.42659	1	unchanged	0.171101	0.853087	unchanged	-0.0552891	0.956198	unchanged
ENSMUSG00000010362	chr11	101627194	101636100	+	Rdm1	RAD52 motif 1 [Source:MGI Symbol;Acc:MGI:1913849]	protein_coding	49.336	0.0646209	0.878792	unchanged	0.409746	0.205977	unchanged	0.430169	0.496847	unchanged	0.215051	0.633195	unchanged	0.111814	0.80983	unchanged	0.211029	1	unchanged	-0.119134	0.841329	unchanged	0.269554	0.553501	unchanged
ENSMUSG00000010376	chr14	55662262	55672124	-	Nedd8	neural precursor cell expressed, developmentally down-regulated gene 8 [Source:MGI Symbol;Acc:MGI:97301]	protein_coding	135.42	0.28582	0.00767407	unchanged	-0.474878	1.77074e-06	unchanged	-0.22972	0.226901	unchanged	-0.0564589	0.746343	unchanged	0.0562293	0.746999	unchanged	0.0263475	1	unchanged	-0.0347599	0.877546	unchanged	-0.0062855	0.978477	unchanged
ENSMUSG00000010392	chr11	76726601	76763579	-	Gosr1	golgi SNAP receptor complex member 1 [Source:MGI Symbol;Acc:MGI:1858260]	protein_coding	44.0227	-0.23926	0.128229	unchanged	-0.0437318	0.814454	unchanged	0.0108536	0.992073	unchanged	0.302792	0.0824436	unchanged	-0.159498	0.423463	unchanged	-0.0135883	1	unchanged	0.213042	0.316142	unchanged	-0.234659	0.229183	unchanged
ENSMUSG00000010406	chr14	54426908	54429756	+	Mrpl52	mitochondrial ribosomal protein L52 [Source:MGI Symbol;Acc:MGI:1916086]	protein_coding	205.631	-0.868294	2.60773e-13	unchanged	0.563893	4.17912e-06	unchanged	-0.182105	0.491819	unchanged	0.28892	0.0534749	unchanged	0.123753	0.45465	unchanged	-0.00549619	1	unchanged	0.1118	0.61151	unchanged	-0.0117473	0.963599	unchanged
ENSMUSG00000010453	chr1	36335729	36369181	-	Kansl3	KAT8 regulatory NSL complex subunit 3 [Source:MGI Symbol;Acc:MGI:1918055]	protein_coding	24.8931	0.458033	0.0458633	unchanged	-0.0475133	0.885532	unchanged	-0.0736178	0.936222	unchanged	-0.767724	0.00180158	unchanged	-0.913691	0.00312993	unchanged	-0.269575	1	unchanged	-0.266037	0.493196	unchanged	-0.177336	0.652556	unchanged
ENSMUSG00000010517	chr4	109676587	109963960	+	Faf1	Fas-associated factor 1 [Source:MGI Symbol;Acc:MGI:109419]	protein_coding	106.768	0.549451	7.00233e-05	unchanged	-0.64589	6.76753e-07	unchanged	-0.148146	0.70347	unchanged	0.081417	0.715327	unchanged	0.50628	0.000588588	unchanged	-0.154009	1	unchanged	-0.162051	0.487191	unchanged	-0.0269217	0.934968	unchanged
ENSMUSG00000010529	chr12	111484608	111485823	-	Gm266	predicted gene 266 [Source:MGI Symbol;Acc:MGI:2685112]	protein_coding	0.168823	0	NA	unchanged	0.936196	NA	unchanged	0	NA	unchanged	0	NA	unchanged	0.297839	NA	unchanged	-0.316993	1	unchanged	-0.260619	NA	unchanged	0.571404	NA	unchanged
ENSMUSG00000010538	chr3	88282756	88296999	-	Tsacc	TSSK6 activating co-chaperone [Source:MGI Symbol;Acc:MGI:1924177]	protein_coding	4.23134	-1.22602	0.0469594	Down	-0.724281	0.140912	unchanged	0.0412109	0.988773	unchanged	0.167274	0.898909	unchanged	-0.975119	0.115242	unchanged	-0.265619	1	unchanged	0.721306	0.310704	unchanged	-0.178719	0.850271	unchanged
ENSMUSG00000010554	chr11	74770829	74828525	+	Mettl16	methyltransferase like 16 [Source:MGI Symbol;Acc:MGI:1914743]	protein_coding	37.1168	0.547373	0.000358844	unchanged	-0.11728	0.529565	unchanged	-0.0472848	0.943749	unchanged	-0.0652626	0.800582	unchanged	0.0655028	0.842886	unchanged	0.169821	1	unchanged	-0.38517	0.0894903	unchanged	-0.325863	0.171691	unchanged
ENSMUSG00000010592	chr17	50279394	50293636	-	Dazl	deleted in azoospermia-like [Source:MGI Symbol;Acc:MGI:1342328]	protein_coding	4.69254	0.287816	0.815508	unchanged	-0.924005	0.325698	unchanged	-0.621155	0.849342	unchanged	-2.18611	0.0927882	unchanged	-2.28025	0.0605026	unchanged	-1.70555	1	unchanged	-1.07921	0.474014	unchanged	-3.17001	0.00137087	Down
ENSMUSG00000010607	chr9	22156845	22158358	+	Pigyl	phosphatidylinositol glycan anchor biosynthesis, class Y-like [Source:MGI Symbol;Acc:MGI:1913518]	protein_coding	98.2008	0.375542	0.105331	unchanged	1.3928	4.24975e-12	Up	0.408069	0.30603	unchanged	-0.162559	0.622076	unchanged	-0.833372	6.89e-05	unchanged	0.295591	1	unchanged	-0.142078	0.713208	unchanged	0.0896622	0.812964	unchanged
ENSMUSG00000010608	chr12	83631235	83683123	+	Rbm25	RNA binding motif protein 25 [Source:MGI Symbol;Acc:MGI:1914289]	protein_coding	144.706	1.42663	1.12784e-30	Up	-0.0445959	0.801979	unchanged	0.107833	0.804524	unchanged	-0.00695756	0.98742	unchanged	0.232701	0.156676	unchanged	-0.224865	1	unchanged	0.225	0.249903	unchanged	0.083941	0.724776	unchanged
ENSMUSG00000010609	chr1	180227003	180263438	-	Psen2	presenilin 2 [Source:MGI Symbol;Acc:MGI:109284]	protein_coding	2.92099	1.5911	0.0590762	unchanged	0.907753	0.113826	unchanged	-0.266932	0.949003	unchanged	-0.577295	0.559429	unchanged	-0.0131558	0.991559	unchanged	-0.804954	1	unchanged	-0.112065	0.919947	unchanged	-0.167384	0.85638	unchanged
ENSMUSG00000010651	chr9	119148022	119157093	-	Acaa1b	acetyl-Coenzyme A acyltransferase 1B [Source:MGI Symbol;Acc:MGI:3605455]	protein_coding	1.82429	2.17464	0.0361085	Up	1.50411	0.0441135	Up	-0.353123	0.943937	unchanged	-1.22604	0.268902	unchanged	-2.36309	0.0257287	Down	-0.703355	1	unchanged	-0.923768	0.39571	unchanged	-0.324968	0.783372	unchanged
ENSMUSG00000010660	chr9	119071526	119093502	-	Plcd1	phospholipase C, delta 1 [Source:MGI Symbol;Acc:MGI:97614]	protein_coding	81.9605	-2.68157	6.2606e-26	Down	-1.78486	8.18837e-14	Down	-0.250729	0.705292	unchanged	0.0764313	0.895194	unchanged	0.121955	0.77138	unchanged	-0.0208382	1	unchanged	0.824414	0.00827207	unchanged	0.92016	0.00133338	unchanged
ENSMUSG00000010663	chr19	10182887	10196877	+	Fads1	fatty acid desaturase 1 [Source:MGI Symbol;Acc:MGI:1923517]	protein_coding	18.9091	0.512708	0.384542	unchanged	1.41933	0.00863181	Up	0.470934	0.742747	unchanged	-1.46459	0.0194548	Down	-2.43696	2.58e-06	Down	0.515575	1	unchanged	-0.888654	0.247559	unchanged	-1.51802	0.0126678	Down
ENSMUSG00000010721	chr5	29229801	29378390	-	Lmbr1	limb region 1 [Source:MGI Symbol;Acc:MGI:1861746]	protein_coding	7.46853	0.461844	0.267661	unchanged	0.232182	0.592597	unchanged	-0.563282	0.560563	unchanged	0.516983	0.232138	unchanged	-0.241212	0.634642	unchanged	-0.385266	1	unchanged	0.276802	0.661016	unchanged	-0.407387	0.463704	unchanged
ENSMUSG00000010751	chr7	143634805	143649661	-	Tnfrsf22	tumor necrosis factor receptor superfamily, member 22 [Source:MGI Symbol;Acc:MGI:1930270]	protein_coding	1.78891	0.952047	0.371025	unchanged	0.856345	0.265384	unchanged	-1.66356	0.49251	unchanged	-2.47505	0.0364384	Down	-3.191	0.00252979	Down	0.409313	1	unchanged	-0.772851	0.514694	unchanged	-0.746243	0.471394	unchanged
ENSMUSG00000010755	chr7	143557229	143600090	-	Cars	cysteinyl-tRNA synthetase [Source:MGI Symbol;Acc:MGI:1351477]	protein_coding	40.2174	2.13833	8.03091e-17	Up	0.593518	0.0191631	unchanged	0.126519	0.917786	unchanged	-0.45778	0.118224	unchanged	-1.67825	5.59e-11	Down	0.0689835	1	unchanged	-0.179071	0.696077	unchanged	-0.526807	0.0755952	unchanged
ENSMUSG00000010760	chr7	143501544	143503150	-	Phlda2	pleckstrin homology like domain, family A, member 2 [Source:MGI Symbol;Acc:MGI:1202307]	protein_coding	22.3216	-3.0211	0.000539545	Down	-1.41381	0.0234345	Down	0.665639	0.613284	unchanged	0.318629	0.874894	unchanged	-0.311464	0.783345	unchanged	0.148112	1	unchanged	-0.312282	0.825546	unchanged	-1.1945	0.111546	unchanged
ENSMUSG00000010796	chr6	18050963	18109061	-	Asz1	ankyrin repeat, SAM and basic leucine zipper domain containing 1 [Source:MGI Symbol;Acc:MGI:1921318]	protein_coding	5.39102	-0.587654	0.449567	unchanged	-1.30531	0.0344103	Down	0.126091	0.962327	unchanged	0.359245	0.744963	unchanged	-0.625804	0.510381	unchanged	-0.175616	1	unchanged	-0.0305317	0.984116	unchanged	-0.120104	0.938407	unchanged
ENSMUSG00000010830	chr15	79516410	79527739	+	Kdelr3	KDEL (Lys-Asp-Glu-Leu) endoplasmic reticulum protein retention receptor 3 [Source:MGI Symbol;Acc:MGI:2145953]	protein_coding	10.7416	-2.13131	1.57065e-06	Down	-0.782419	0.101151	unchanged	0.498739	0.588476	unchanged	1.09353	0.0496783	Up	-0.445665	0.519882	unchanged	0.567613	1	unchanged	0.40464	0.624868	unchanged	0.425765	0.565546	unchanged
ENSMUSG00000010911	chr2	103073674	103092644	+	Apip	APAF1 interacting protein [Source:MGI Symbol;Acc:MGI:1926788]	protein_coding	20.6283	1.7654	7.08489e-11	Up	1.3271	3.80012e-08	Up	-0.317848	0.748644	unchanged	-0.760514	0.00536525	unchanged	-0.585854	0.0242356	unchanged	0.0268108	1	unchanged	-0.0789155	0.863846	unchanged	-0.166798	0.629505	unchanged
ENSMUSG00000010914	chr2	103021074	103073513	-	Pdhx	pyruvate dehydrogenase complex, component X [Source:MGI Symbol;Acc:MGI:1351627]	protein_coding	23.8066	-0.0580029	0.827233	unchanged	-0.91372	4.95853e-06	unchanged	-0.108237	0.876096	unchanged	-0.306701	0.231484	unchanged	-0.37565	0.228133	unchanged	-0.0632506	1	unchanged	0.018109	0.973574	unchanged	-0.131004	0.752113	unchanged
ENSMUSG00000010936	chr8	110618584	110720398	+	Vac14	Vac14 homolog (S. cerevisiae) [Source:MGI Symbol;Acc:MGI:2157980]	protein_coding	46.4263	-0.13411	0.49675	unchanged	1.02982	6.96704e-12	Up	-0.457163	0.0745235	unchanged	-0.271033	0.218898	unchanged	-0.10153	0.649667	unchanged	0.0761435	1	unchanged	-0.416394	0.032176	unchanged	-0.6159	0.000449384	unchanged
ENSMUSG00000011034	chr5	33104218	33162870	+	Slc5a1	solute carrier family 5 (sodium/glucose cotransporter), member 1 [Source:MGI Symbol;Acc:MGI:107678]	protein_coding	0.308917	0	NA	unchanged	0	1	unchanged	0	NA	unchanged	0.419346	NA	unchanged	-0.784176	NA	unchanged	0.404351	1	unchanged	0	NA	unchanged	0	NA	unchanged
ENSMUSG00000011096	chr7	44848990	44855421	+	Akt1s1	AKT1 substrate 1 (proline-rich) [Source:MGI Symbol;Acc:MGI:1914855]	protein_coding	123.69	-1.23673	4.12019e-28	Down	-0.568621	8.24488e-07	unchanged	-0.104348	0.745096	unchanged	0.0277288	0.908737	unchanged	0.267211	0.0803935	unchanged	-0.194651	1	unchanged	-0.290972	0.08563	unchanged	-0.0575187	0.812109	unchanged
ENSMUSG00000011114	chr9	37648762	37657312	-	Tbrg1	transforming growth factor beta regulated gene 1 [Source:MGI Symbol;Acc:MGI:1100877]	protein_coding	155.28	0.0690432	0.723068	unchanged	0.620903	1.40672e-05	unchanged	-0.315101	0.231391	unchanged	0.129219	0.555262	unchanged	0.628231	2e-05	unchanged	0.00979711	1	unchanged	0.213783	0.330482	unchanged	0.437864	0.0091278	unchanged
ENSMUSG00000011148	chr12	112620044	112641360	+	Adssl1	adenylosuccinate synthetase like 1 [Source:MGI Symbol;Acc:MGI:87947]	protein_coding	1.56783	-0.919629	0.358715	unchanged	0.516613	0.539679	unchanged	0.652606	0.72459	unchanged	1.06503	0.360544	unchanged	-0.0628333	0.983152	unchanged	0.276302	1	unchanged	0.450034	0.708966	unchanged	-1.30493	0.206652	unchanged
ENSMUSG00000011158	chr12	112960084	113000704	-	Brf1	BRF1, RNA polymerase III transcription initiation factor 90 kDa subunit [Source:MGI Symbol;Acc:MGI:1919558]	protein_coding	14.0686	0.65371	0.00878017	unchanged	0.208726	0.469036	unchanged	0.190881	0.814647	unchanged	-0.568653	0.047863	unchanged	-0.413673	0.221347	unchanged	-0.211765	1	unchanged	0.17462	0.700006	unchanged	-0.306753	0.369563	unchanged
ENSMUSG00000011179	chr12	17544793	17551505	+	Odc1	ornithine decarboxylase, structural 1 [Source:MGI Symbol;Acc:MGI:97402]	protein_coding	935.535	-1.37661	4.51737e-11	Down	-2.48412	3.48874e-34	Down	-0.687957	0.0274742	unchanged	-1.16213	2.61609e-07	Down	-0.422919	0.0953093	unchanged	-0.0239531	1	unchanged	0.260616	0.4659	unchanged	-0.00185421	0.998041	unchanged
ENSMUSG00000011254	chr11	45946842	45955494	-	Thg1l	tRNA-histidine guanylyltransferase 1-like (S. cerevisiae) [Source:MGI Symbol;Acc:MGI:1913878]	protein_coding	13.9979	0.130898	0.799632	unchanged	0.243396	0.591377	unchanged	0.355115	0.724601	unchanged	-0.758632	0.105656	unchanged	-0.8199	0.0792757	unchanged	0.0271177	1	unchanged	-0.768594	0.157085	unchanged	-0.146518	0.850601	unchanged
ENSMUSG00000011256	chr11	46055991	46147343	+	Adam19	a disintegrin and metallopeptidase domain 19 (meltrin beta) [Source:MGI Symbol;Acc:MGI:105377]	protein_coding	19.5366	3.39579	8.91309e-12	Up	4.86379	9.22104e-17	Up	0.567279	0.718267	unchanged	-2.57554	1.7724e-07	Down	-0.911763	0.0565188	unchanged	0.290437	1	unchanged	-1.67009	0.00133648	Down	-0.992258	0.0759148	unchanged
ENSMUSG00000011257	chr4	123262350	123298925	+	Pabpc4	poly(A) binding protein, cytoplasmic 4 [Source:MGI Symbol;Acc:MGI:2385206]	protein_coding	509.347	-1.68316	1.68122e-56	Down	-1.68666	1.40888e-58	Down	0.249207	0.180593	unchanged	0.603249	3.76231e-07	unchanged	0.810751	2.49e-12	unchanged	-0.115131	1	unchanged	0.203902	0.22241	unchanged	0.223425	0.146146	unchanged
ENSMUSG00000011263	chr7	19463330	19496762	+	Exoc3l2	exocyst complex component 3-like 2 [Source:MGI Symbol;Acc:MGI:1921713]	protein_coding	18.4779	-4.39901	8.70329e-11	Down	-2.60019	0.000140235	Down	0.480442	0.815972	unchanged	-0.0641385	0.97784	unchanged	-0.460217	0.707679	unchanged	-0.171818	1	unchanged	-1.09935	0.374602	unchanged	-2.23621	0.106303	unchanged
[truncated: 14,643 more rows]
